# Supplementary material for: Facile synthesis of diverse hetero polyaromatic hydrocarbons (PAHs) via the styryl Diels–Alder reaction of conjugated diynes
Source: Royal Society of Chemistry journal article supplement (doi:10.1039/d2qo00644h), 2022-01-01

SUPPORTING INFORMATION

**Facile Synthesis of Diverse Hetero Polyaromatic Hydrocarbons  
(PAHs) via Styryl Diels-Alder Reaction of Conjugated Diynes**

Jingwen Wei,<sup>a</sup> Mengjia Liu,<sup>a</sup> Xiaohan Ye,<sup>a</sup> Shuyao Zhang,<sup>a</sup> Elaine Sun,<sup>a</sup> Chuan Shan,<sup>a</sup> Lukasz Wojtas,<sup>a</sup> Xiaodong Shi\*,<sup>a</sup>

<sup>a</sup>*Department of Chemistry, University of South Florida, Tampa, Florida 33620, United States*

|                                            |     |
|--------------------------------------------|-----|
| I. General Methods and Materials           | S2  |
| II. General Procedures                     | S2  |
| III. Condition Optimization                | S9  |
| IV. Optical Properties                     | S10 |
| V. ORTEP Drawing of the Crystal Structures | S11 |
| VII. Compounds Characterization            | S20 |
| VIII. NMR Spectra Data                     | S47 |

# I. General Methods and Materials

All of the reactions dealing with air and/or moisture-sensitive compounds were carried out under an atmosphere of argon using oven/flame-dried glassware and standard syringe/septa techniques. Unless otherwise noted, all commercial reagents and solvents were obtained from the commercial provider and used without further purification.  $^1\text{H}$  NMR,  $^{13}\text{C}$  NMR, and  $^{19}\text{F}$  NMR spectra were recorded on Bruker Avance NEO-600 MHz and NEO-400 MHz spectrometers. Chemical shifts were reported relative to internal tetramethylsilane ( $\delta$  0.00 ppm) or  $\text{CDCl}_3$  ( $\delta$  7.26 ppm) for  $^1\text{H}$  and  $\text{CDCl}_3$  ( $\delta$  77.00 ppm) for  $^{13}\text{C}$ . Flash column chromatography was performed on 230-430 mesh silica gel. Analytical thin layer chromatography was performed with precoated glass baked plates (250 $\mu$ ) and visualized by fluorescence and by charring after treatment with potassium permanganate stain. Chirality determination was measured in Agilent 1260 infinity HPLC system. HRMS were recorded on Agilent 6320 TOF MS/Agilent 1200 HPLC spectrometer and an Agilent 7890 GC-MS QTOF 7200 and 6540 LC/QTOF spectrometer in the mass-spec facility in the University of South Florida.

## II. General Procedures

### 2.1 General procedure for the synthesis of 3a-3v

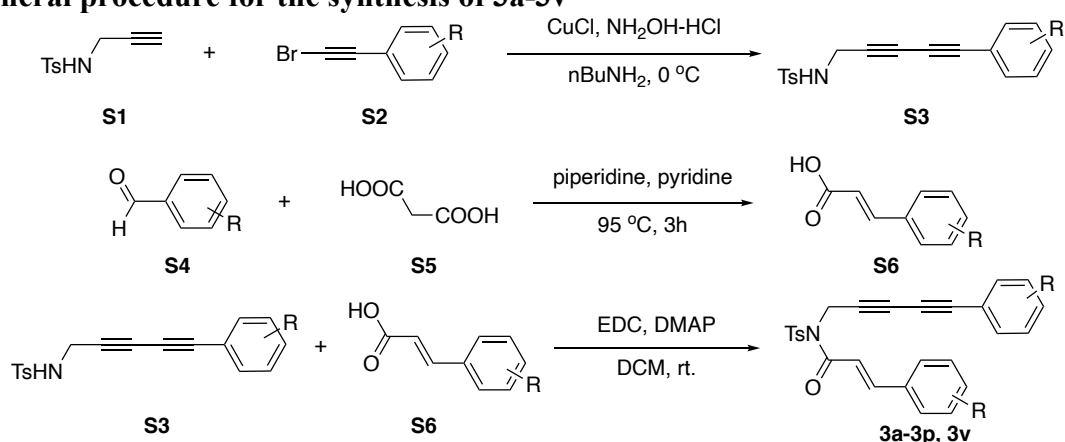

#### Method A: Synthesis of diynes S3

To a round bottom flask with CuCl (1.1 equiv.) add 30% (v/v) nBuNH<sub>2</sub> (0.25 M) aqueous solution at 0 °C. Fill flask with argon and add NH<sub>2</sub>OH·HCl until the blue color disappeared. Refill flask with argon again. A solution of terminal alkyne S1 (1 equiv.) in DCM (1 M) (was then added, followed by the slow addition of a solution of bromoalkyne S2 (2 equiv.) in DCM (1 M) over 5 minutes. The reaction mixture was stirred until terminal alkyne disappear on TLC, quenched with saturated aqueous NH<sub>4</sub>Cl and extracted with EtOAc for three times. The combined organic layers were washed with brine, dried over Na<sub>2</sub>SO<sub>4</sub>, and concentrated under reduced pressure. The crude product was purified by column chromatography on silica gel to give the desired product.

#### Method B: Synthesis of cinnamic acid S6

To a solution of aryl formaldehyde S4 (1.0 equiv) and malonic acid S5 (1.2 equiv) in dry pyridine (0.1 M) was added slowly of piperidine (0.05 equiv.) at room temperature. Then warm the mixture to 95°C for 3h. The solvent was then poured into a beaker with 1M cold hydrochloric

acid, and the crude products were collected by filtration. Products are further dried by lyophilizer.

### Method C: Synthesis of 3a-3v

To a round bottom flask with diynes **S3** (1 equiv.), cinnamic acid **S6** (1.5 equiv.), 4-dimethylaminopyridine (0.1 equiv.) in anhydrous DCM at room temperature add EDC (2 equiv.) slowly. Track the reaction by TLC. The reaction was quenched with water and extracted with EtOAc for three times. The solvent was then removed under reduced pressure, and the crude product was purified by column chromatography on silica gel to afford the desired products **3a-3v**.

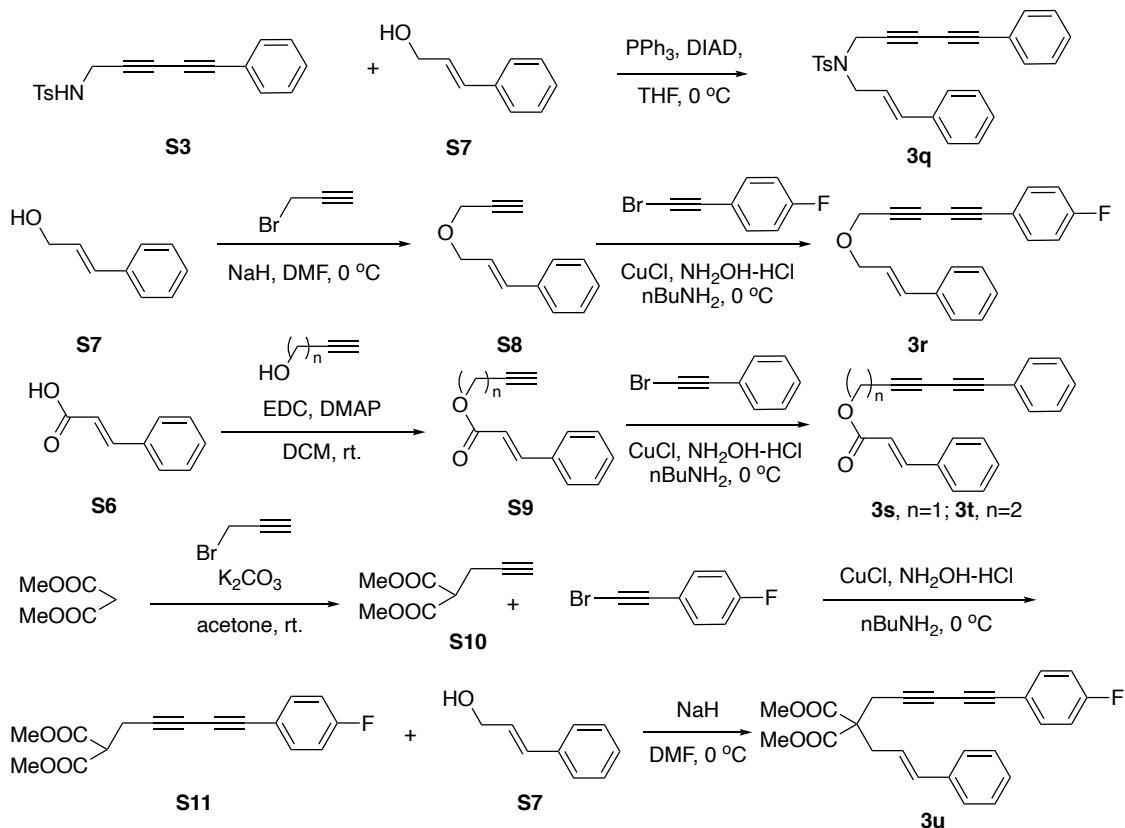

### Method C: Synthesis of 3q

To a solution of amide **S3** (1.0 equiv.),  $\text{PPh}_3$  (2.0 equiv.), cinnamic alcohol **S7** (2.0 equiv.) in anhydrous THF (0.1 M) under argon at  $0\text{ }^\circ\text{C}$  was added slowly of DIAD (2.2 equiv.). Then warm the mixture to room temperature for 3h. The solvent was then removed under reduced pressure, and the crude product was purified by column chromatography on silica gel to afford the desired product **3q**.

### Method D: Synthesis of 3r

To a round bottom flask with **S7** (1 equiv.), propargyl bromide (1.2 equiv.) in anhydrous DMF at  $0\text{ }^\circ\text{C}$  add NaH (1.2 equiv, 60 % dispersion in mineral oil) slowly. After stirring for 30 min, the reaction solution was warmed up the room temperature for 4 h. The reaction was quenched with water and extracted with EtOAc for three times. The solvent was then removed under reduced pressure, and the crude product was purified by column chromatography on silica gel to afford the desired product **S8**. Treat **S8** with **method A** to produce the desired product **3r**.

### Method E: Synthesis of 3s and 3t

To a round bottom flask with alcohol (1 equiv.), cinnamic acid **S6** (1.5 equiv.), 4-dimethylaminopyridine (0.1 equiv.) in anhydrous DCM at room temperature add EDC (2 equiv.) slowly. Track the reaction by TLC. The reaction was quenched with water and extracted with EtOAc for three times. The solvent was then removed under reduced pressure, and the crude product was purified by column chromatography on silica gel to afford the desired products **S9**. Treat **S9** with **method A** to produce the desired product **3s** and **3t**.

### Method F: Synthesis of 3u

To a round bottom flask with dimethyl malonate (1 equiv.), propargyl bromide (1.2 equiv.) in anhydrous acetone at room temperature add  $K_2CO_3$  (5 equiv.). After stirring for 12 h, the reaction was quenched with water and extracted with EtOAc for three times. The solvent was then removed under reduced pressure, and the crude product was purified by column chromatography on silica gel to afford the desired product **S10**. Treat **S10** with **method A** to produce the desired product **S11**. Then treat **S11** with **method C** to produce the desired product **3u**.

### 2.2 Procedure for 1a

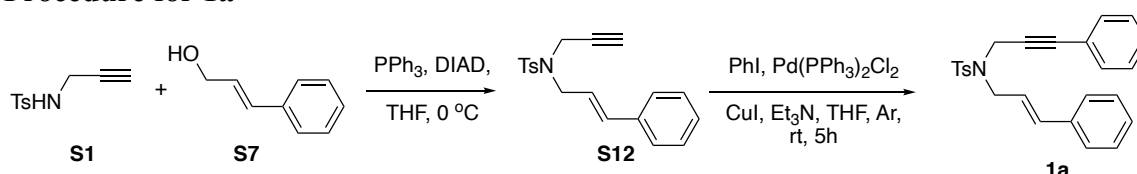

To a solution of amide **S1** (1.0 equiv.),  $PPh_3$  (2.0 equiv.), cinnamic alcohol **S7** (2.0 equiv.) in anhydrous THF (0.1 M) under argon at 0 °C was added slowly of DIAD (2.2 equiv.). Then warm the mixture to room temperature for 3h. The solvent was then removed under reduced pressure, and the crude product was purified by column chromatography on silica gel to afford the desired product **S12**.

To a solution of amide **S12** (1.0 equiv.),  $Pd(PPh_3)_2Cl_2$  (0.1 equiv.),  $CuI$  (0.05 equiv.) in anhydrous THF under argon at 0 °C was added  $Et_3N$  (5 equiv.), followed adding  $PhI$  (1.5 equiv.). Then stir the mixture at room temperature for 3h. The solvent was then removed under reduced pressure, and the crude product was purified by column chromatography on silica gel to afford the desired product **1a**.

### 2.3 Procedure for 1ac(1ad)

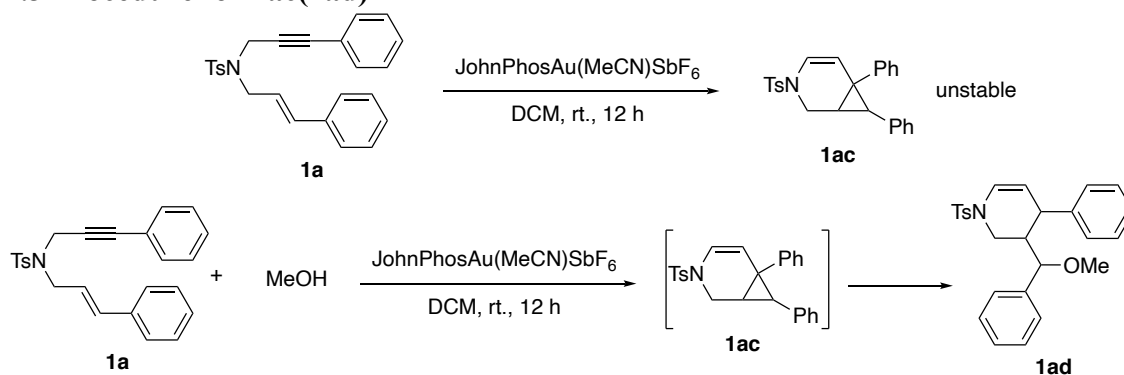

To a solution of amide **1a** (1.0 equiv in anhydrous DCM (0.1 M) at room temperature was added  $JohnPhosAu(MeCN)SbF_6$  (0.1 equiv.). After 12 h, the reaction is messy because of the

decomposition of **1ac**. The product **1ac** is not stable and easily decompose during separation. We use MeOH as nucleophile trapping **1ac** to produce product **1ad**. To a solution of amide **1a** (1.0 equiv.) and MeOH (10 equiv.) in anhydrous DCM (0.1 M) at room temperature was added JohnPhosAu(MeCN)SbF<sub>6</sub> (0.1 equiv.). The solvent was then removed under reduced pressure, and the crude product was purified by column chromatography on silica gel to afford the desired product **1ad**.

## 2.4 Procedure for 2a

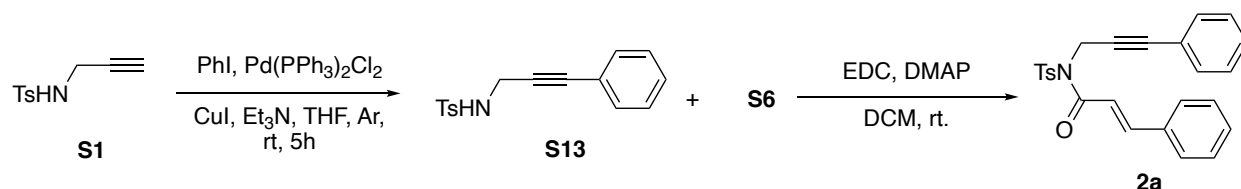

To a solution of amide **S1** (1.0 equiv.), Pd(PPh<sub>3</sub>)<sub>2</sub>Cl<sub>2</sub> (0.1 equiv.), CuI (0.05 equiv.) in anhydrous THF under argon at 0 °C was added Et<sub>3</sub>N (5 equiv.), followed adding PhI (1.5 equiv.). Then stir the mixture at room temperature for 3h. The solvent was then removed under reduced pressure, and the crude product was purified by column chromatography on silica gel to afford the desired product **S13**.

To a round bottom flask with amine **S13** (1 equiv.), cinnamic acid **S6** (1.5 equiv.), 4-dimethylaminopyridine (0.1 equiv.) in anhydrous DCM at room temperature add EDC (2 equiv.) slowly. Track the reaction by TLC. The reaction was quenched with water and extracted with EtOAc for three times. The solvent was then removed under reduced pressure, and the crude product was purified by column chromatography on silica gel to afford the desired product **2a**.

## 2.5 Procedure for 2ab,2ea

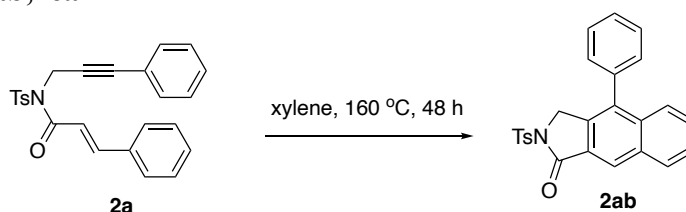

The resulting mixture of **2a** (0.2mmol) in xylene (10 mL) in a 20 mL vial was heated under 160 °C for 48 h in dark. Track the reaction by TLC. The solvent was then removed under reduced pressure, and the crude product was purified by column chromatography on silica gel to afford the desired product **2ab**.

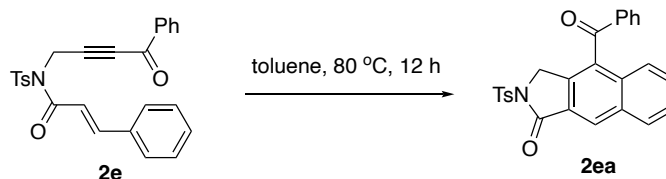

The resulting mixture of **2e** (0.2mmol) in toluene (10 mL) in a 20 mL vial was heated under 80 °C for 12 h dark. The solvent was then removed under reduced pressure, and the crude product was purified by column chromatography on silica gel to afford the desired product **2ea** with 58% conversion and 53% yield.

## 2.6 Procedure for 2b-2e

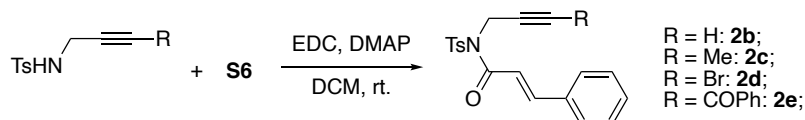

To a round bottom flask with amine (1 equiv.), cinnamic acid **S6** (1.5 equiv.), 4-dimethylaminopyridine (0.1 equiv.) in anhydrous DCM at room temperature add EDC (2 equiv.) slowly. Track the reaction by TLC. The reaction was quenched with water and extracted with EtOAc for three times. The solvent was then removed under reduced pressure, and the crude product was purified by column chromatography on silica gel to afford the desired product **2b-2e**.

## 2.7 General procedure for the synthesis of 4a-4s and 6a

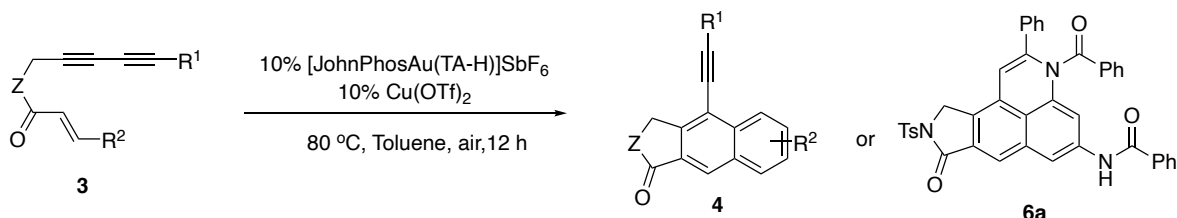

To a 20 mL vial with **3** (0.2mmol) in toluene (10 mL) was added 10% JohnPhosAu(TA-H)SbF<sub>6</sub> (17 mg), 10% Cu(OTf)<sub>2</sub> (7.2mg) subsequently. The resulting mixture was heated under 80 °C for 12 h in air under dark. Track the reaction by TLC. The solvent was then removed under reduced pressure, and the crude product was purified by column chromatography on silica gel to afford the desired product **4a-4s** or **6a**.

## 2.8 Procedure for the synthesis of 5aa and 5ab

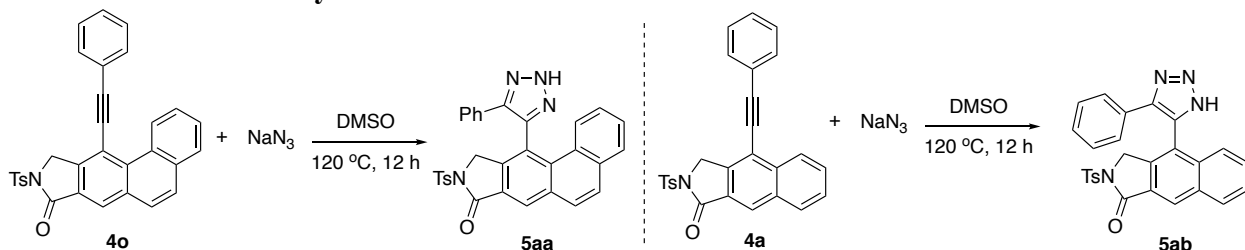

To a round bottom flask with **4o** or **4a** (1 equiv.) in DMSO (0.1 M) was added NaN<sub>3</sub> (2 equiv.) slowly at room temperature. Then warm the mixture to 120°C and stir for 12h. The reaction was quenched with water and extracted with EtOAc for three times. The solvent was then removed under reduced pressure, and the crude product was purified by column chromatography on silica gel to afford the desired product **5aa** or **5ab**. Both **5aa** and **5ab** have poor solubility in CDCl<sub>3</sub>, *d*<sub>6</sub>-DMSO. We used CDCl<sub>3</sub>:CD<sub>3</sub>OD (10:1) as solvent for NMR.

## 2.9 Procedure for the synthesis of 5a-5d

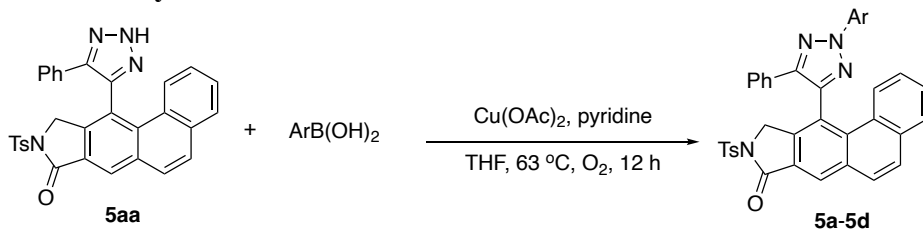

To a round bottom flask successively added triazole **5aa** (1 equiv.), arylboronic acid (2 equiv.), THF (0.1M), pyridine (2 equiv.) and Cu(OAc)<sub>2</sub> (0.1 equiv.) at room temperature. The bottle was

equipped with an oxygen balloon above. Then warm the mixture to 63°C and stir for 12h. Track the reaction by TLC. The solvent was then removed under reduced pressure, and the crude product was purified by column chromatography on silica gel to afford the desired products **5a-5d**.

### 2.10 Procedure for the synthesis of **7a-7d**

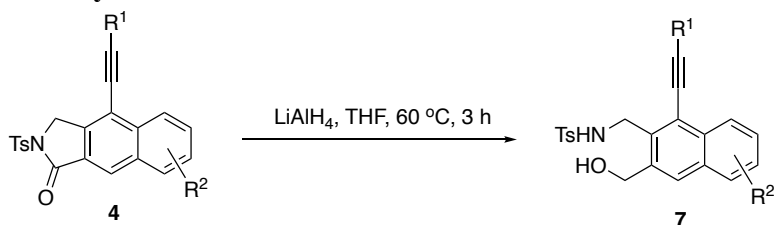

To a round bottom flask with **4** (1 equiv.) in dry THF (0.1 M) was added LiAlH<sub>4</sub> (2 equiv.) slowly at room temperature. Then warm the mixture to 60°C and stir for 3h. Track the reaction by TLC. The reaction was quenched with water and extracted with EtOAc for three times. The solvent was then removed under reduced pressure, and the crude product was purified by column chromatography on silica gel to afford the desired products **7a-7d**.

### 2.11 Procedure for the synthesis of **8a-8d**

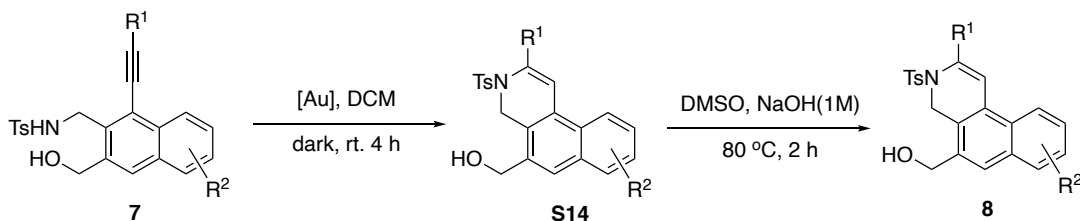

To a round bottom flask with **7a**, **7b**, **7d** (1 equiv.) in DCM (0.1 M) was added JohnPhosAu(MeCN)SbF<sub>6</sub> (0.1 equiv.) at room temperature in dark. (**7c** was added PPh<sub>3</sub>AuNTf<sub>2</sub>) at room temperature in dark). Then stir the mixture for 4 h. The solvent was then removed under reduced pressure to get products **S14**. Without purification, to the flask with **S14** was added DMSO and NaOH (1M aq., 3 equiv.) at room temperature. Then warm the mixture to 80°C and stir for 2 h. Track the reaction by TLC. The reaction was quenched with water and extracted with EtOAc for three times. The solvent was then removed under reduced pressure, and the crude product was purified by column chromatography on silica gel to afford the desired products **8a-8d**.

### 2.11 Procedure for the **2a-2e** ISDDA reaction

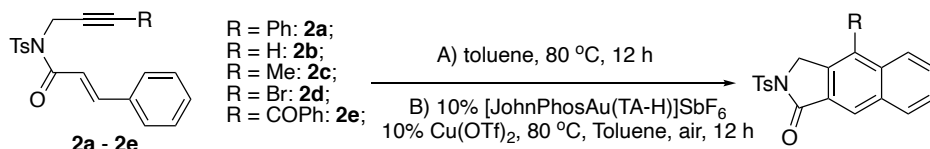

Condition A: The resulting mixture of **2a-2e** (0.2mmol) in toluene (10 mL) in a 20 mL vial was heated under 80 °C for 12 h dark. **2a-2d** have no conversion. **2e** afford the desired product **2ea** with 58% conversion and 53% yield.

Condition B: To a 20 mL vial with **2a-2e** (0.2mmol) in toluene (10 mL) was added 10% JohnPhosAu(TA-H)SbF<sub>6</sub> (17 mg), 10% Cu(OTf)<sub>2</sub> (7.2mg) subsequently. The resulting mixture

was heated under 80 °C for 12 h in air under dark. **2a** have no conversion. **2b** and **2c** starting materials decomposed and no clear products are identified. For **2d**, head-to-head coupling products are detected as literature reported.<sup>1</sup> **2e** afford the desired product **2ea** with 100% conversion and 40% yield.

#### Reference

1 M. Kreuzahler and G. Haberhauer, Cyclopropenylmethyl Cation: A Concealed Intermediate in Gold(I)-Catalyzed Reactions, *Angew. Chem. Int. Ed.*, 2020, **59**, 17739-17749.



### III. Condition Optimization

#### 3.1 Optimization condition table<sup>[a][b]</sup>

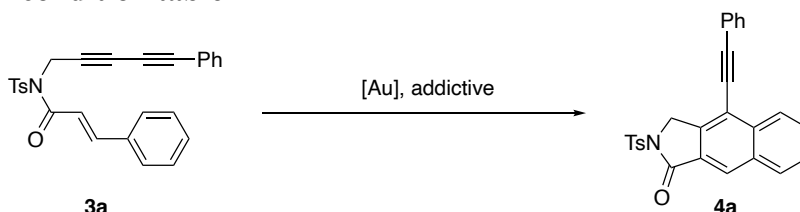

| Entry | Au Catalyst (10%)                                   | Additive (10%)                     | Temp. (°C) | Solvents | Yield (%)<br>2a |
|-------|-----------------------------------------------------|------------------------------------|------------|----------|-----------------|
| 1     | -                                                   | -                                  | 80         | toluene  | 55              |
| 2     | JohnPhos(TA-H)AuSbF <sub>6</sub>                    | -                                  | 80         | toluene  | 84              |
| 3     | JohnPhos(TA-H)AuSbF <sub>6</sub>                    | Cu(OTf) <sub>2</sub>               | 80         | toluene  | 95              |
| 4     | JohnPhos(TA-H)AuSbF <sub>6</sub>                    | Ga(OTf) <sub>3</sub>               | 80         | toluene  | 14              |
| 6     | JohnPhos(TA-H)AuSbF <sub>6</sub>                    | Zn(OTf) <sub>2</sub>               | 80         | toluene  | 77              |
| 7     | JohnPhos(TA-H)AuSbF <sub>6</sub>                    | Fe(OTf) <sub>3</sub>               | 80         | toluene  | 5               |
| 8     | JohnPhos(TA-H)AuSbF <sub>6</sub>                    | CuCl                               | 80         | toluene  | 77              |
| 9     | JohnPhos(TA-H)AuSbF <sub>6</sub>                    | CuCl <sub>2</sub>                  | 80         | toluene  | 80              |
| 10    | JohnPhos(TA-H)AuSbF <sub>6</sub>                    | Cu(OAc) <sub>2</sub>               | 80         | toluene  | 72              |
| 11    | JohnPhos(TA-H)AuSbF <sub>6</sub>                    | Cu(acac) <sub>2</sub>              | 80         | toluene  | 65              |
| 12    | JohnPhos(TA-H)AuSbF <sub>6</sub>                    | CuSO <sub>4</sub>                  | 80         | toluene  | 89              |
| 13    | JohnPhos(TA-H)AuSbF <sub>6</sub>                    | CuOTf                              | 80         | toluene  | 84              |
| 14    | JohnPhos(TA-H)AuSbF <sub>6</sub>                    | CuI                                | 80         | toluene  | 84              |
| 15    | PPh <sub>3</sub> AuNTf <sub>2</sub>                 | -                                  | 80         | toluene  | 69              |
| 16    | PPh <sub>3</sub> AuCl                               | AgSbF <sub>6</sub>                 | 80         | toluene  | 34              |
| 17    | PPh <sub>3</sub> (TA-H)AuSbF <sub>6</sub>           | -                                  | 80         | toluene  | 75              |
| 18    | IPrAuNTf <sub>2</sub>                               | -                                  | 80         | toluene  | 51              |
| 19    | JohnPhosAuCl                                        | AgSbF <sub>6</sub>                 | 80         | toluene  | 60              |
| 20    | XPhos(TA-H)AuSbF <sub>6</sub>                       | -                                  | 80         | toluene  | 68              |
| 21    | -                                                   | Ga(OTf) <sub>3</sub>               | 80         | toluene  | 22              |
| 22    | -                                                   | Cu(OTf) <sub>2</sub>               | 80         | toluene  | 46              |
| 23    | -                                                   | Zn(OTf) <sub>2</sub>               | 80         | toluene  | 52              |
| 24    | -                                                   | CuSO <sub>4</sub>                  | 80         | toluene  | 54              |
| 25    | -                                                   | AgSbF <sub>6</sub>                 | 80         | toluene  | 48              |
| 26    | JohnphosAuNTf <sub>2</sub>                          | -                                  | 80         | toluene  | 76              |
| 27    | XphosAuNTf <sub>2</sub>                             | -                                  | 80         | toluene  | 65              |
| 28    | JohnPhos(MeCN)AuSbF <sub>6</sub>                    | -                                  | 80         | toluene  | 17              |
| 29    | JohnPhos(2,4-NO <sub>2</sub> -TA)AuSbF <sub>6</sub> | -                                  | 80         | toluene  | 77              |
| 30    | 5% JohnPhos(TA-H)AuSbF <sub>6</sub>                 | 5% Cu(OTf) <sub>2</sub>            | 80         | toluene  | 75              |
| 31    | JohnPhos(TA-H)AuSbF <sub>6</sub>                    | Cu(OTf) <sub>2</sub>               | 80         | MeCN     | 50              |
| 32    | JohnPhos(TA-H)AuSbF <sub>6</sub>                    | Cu(OTf) <sub>2</sub>               | 80         | DCE      | 24              |
| 33    | JohnPhos(TA-H)AuSbF <sub>6</sub>                    | Cu(OTf) <sub>2</sub>               | 80         | DMSO     | 60              |
| 34    | JohnPhos(TA-H)AuSbF <sub>6</sub>                    | Cu(OTf) <sub>2</sub>               | 80         | DMF      | 67              |
| 35    | JohnPhos(TA-H)AuSbF <sub>6</sub>                    | Cu(OTf) <sub>2</sub>               | rt.        | toluene  | 0               |
| 36    | JohnPhos(TA-H)AuSbF <sub>6</sub>                    | Cu(OTf) <sub>2</sub>               | 60         | toluene  | 26(conv.30%)    |
| 37    | JohnPhos(TA-H)AuSbF <sub>6</sub>                    | Cu(OTf) <sub>2</sub> (under light) | 80         | toluene  | 88              |
| 38    | JohnPhos(TA-H)AuSbF <sub>6</sub>                    | Cu(OTf) <sub>2</sub> (under argon) | 80         | toluene  | 27              |

<sup>a</sup>Standard reaction conditions: to a solution of **3a** (0.2mmol) in toluene (10 mL), 10% JohnPhosAu(TA-H)SbF<sub>6</sub> (17 mg), 10% Cu(OTf)<sub>2</sub> (7.2mg) was added subsequently. The resulting mixture was heated under 80 °C for 12 h in air under dark. <sup>b</sup>isolated yields

## IV. Optical Properties

**Fluorescence detection Procedures:** A series of stock solution of compound **8a-8d** ( $10^{-5}$  mol/L) was prepared by dissolving the corresponding amount of compound powder in DCE, which was stored in the dark. For fluorescence detection, 5mL stock solutions were used. The fluorescence spectra of mixed solutions were recorded with the corresponding excitation wavelength at room temperature (298 K).

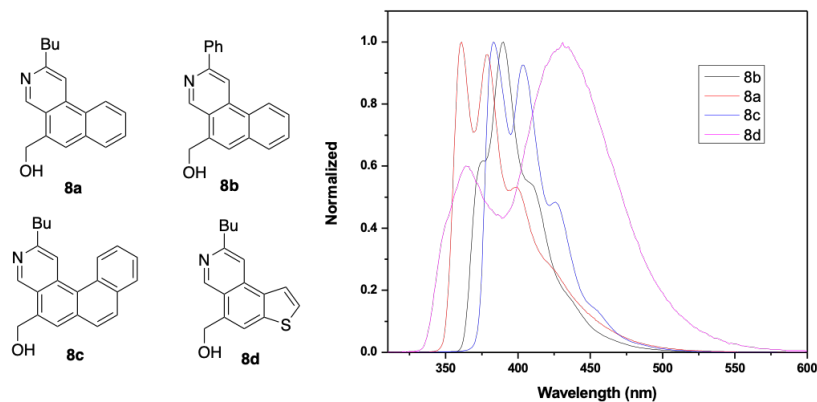

| Name | $\lambda^{ex}$ (nm) | $\lambda^{em}$ (nm) | $\Delta\lambda$ (nm) |
|------|---------------------|---------------------|----------------------|
| 8a   | 254                 | 360&379             | 125                  |
| 8c   | 286                 | 384&406             | 120                  |
| 8d   | 248                 | 366&432             | 184                  |
| 8b   | 287                 | 370                 | 83                   |

## V. ORTEP Drawing of the Crystal Structure

X-ray diffraction data were measured on Bruker D8 Venture PHOTON II CMOS diffractometer equipped with a Cu K $\alpha$  INCOATEC ImuS micro-focus source ( $\lambda = 1.54178 \text{ \AA}$ ). Indexing was performed using APEX4 [1] (Difference Vectors method). Data integration and reduction were performed using SaintPlus [2]. Absorption correction was performed by multi-scan method implemented in SADABS [3]. Space group was determined using XPREP implemented in APEX3 [1]. Structure was solved using SHELXT [4] and refined using SHELXL-2018/3 [5] (full-matrix least-squares on F2) through OLEX2 interface program [6]. Ellipsoid plot was done with Platon [7]. **5ab**, **6a**: Hydrogen atoms of -NH groups were found from difference Fourier map and was freely refined. **6a**: Disordered chloroform molecule were refined with restraints. All remaining hydrogen atoms were refined using riding model. Data and refinement conditions are shown in **Tables S1 - S4**.

[1] Bruker (2022). APEX4. Bruker AXS LLC, Madison, Wisconsin, USA.

[2] Bruker SAINT. Bruker AXS LLC, Madison, Wisconsin, USA.

[3] Krause, L., Herbst-Irmer, R., Sheldrick, G. M., Stalke, D. (2015).

"Comparison of silver and molybdenum microfocus X-ray sources for single-crystal structure determination" *J. Appl. Cryst.* 48, 3-10.

[4] Sheldrick, G. M. (2015). "SHELXT - Integrated space-group and crystal-structure determination", *Acta Cryst.* A71, 3-8.

[5] Sheldrick, G. M. (2015) "Crystal structure refinement with SHELXL", *Acta Cryst.*, C71, 3-8

[6] Dolomanov, O.V.; Bourhis, L.J.; Gildea, R.J.; Howard, J.A.K.; Puschmann, H., OLEX2: A complete structure solution, refinement and analysis program (2009). *J. Appl. Cryst.*, 42, 339-341

[7] A.L.Spek, The Program PLATON is designed as a Multipurpose Crystallographic Tool.

1980-2021 A.L.Spek, Utrecht University, Utrecht, The Netherlands. *Acta Cryst.* 2020, E76, 1-11

**Table S1 Crystal data and structure refinement for 4j.**

|                                             |                                                               |
|---------------------------------------------|---------------------------------------------------------------|
| Identification code                         | 4j                                                            |
| Empirical formula                           | C <sub>27</sub> H <sub>17</sub> BrFNO <sub>3</sub> S          |
| Formula weight                              | 534.39                                                        |
| Temperature/K                               | 100.00                                                        |
| Crystal system                              | monoclinic                                                    |
| Space group                                 | P2 <sub>1</sub> /n                                            |
| a/Å                                         | 7.9493(2)                                                     |
| b/Å                                         | 24.1157(5)                                                    |
| c/Å                                         | 11.4002(2)                                                    |
| α/°                                         | 90                                                            |
| β/°                                         | 91.3000(10)                                                   |
| γ/°                                         | 90                                                            |
| Volume/Å <sup>3</sup>                       | 2184.89(8)                                                    |
| Z                                           | 4                                                             |
| ρ <sub>calc</sub> /cm <sup>3</sup>          | 1.625                                                         |
| μ/mm <sup>-1</sup>                          | 3.806                                                         |
| F(000)                                      | 1080.0                                                        |
| Crystal size/mm <sup>3</sup>                | 0.2 × 0.05 × 0.03                                             |
| Radiation                                   | CuKα (λ = 1.54178)                                            |
| 2θ range for data collection/°              | 7.332 to 159.172                                              |
| Index ranges                                | -9 ≤ h ≤ 10, -30 ≤ k ≤ 30, -14 ≤ l ≤ 13                       |
| Reflections collected                       | 52092                                                         |
| Independent reflections                     | 4705 [R <sub>int</sub> = 0.0530, R <sub>sigma</sub> = 0.0201] |
| Data/restraints/parameters                  | 4705/0/308                                                    |
| Goodness-of-fit on F <sup>2</sup>           | 1.057                                                         |
| Final R indexes [I >= 2σ (I)]               | R <sub>1</sub> = 0.0290, wR <sub>2</sub> = 0.0702             |
| Final R indexes [all data]                  | R <sub>1</sub> = 0.0339, wR <sub>2</sub> = 0.0733             |
| Largest diff. peak/hole / e Å <sup>-3</sup> | 0.33/-0.48                                                    |

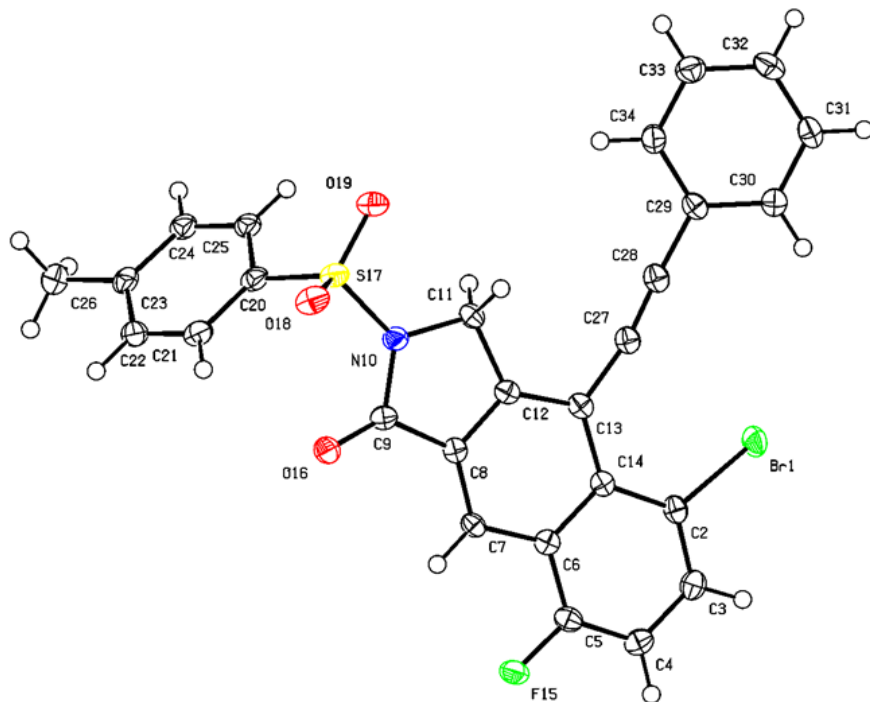

**Figure S1.** Ellipsoid plot of **4j**. Anisotropic displacement parameters were drawn at 50% probability level.  
CCDC: 2161060

**Table S2 Crystal data and structure refinement for 4s.**

|                                             |                                                               |
|---------------------------------------------|---------------------------------------------------------------|
| Identification code                         | 4s                                                            |
| Empirical formula                           | C <sub>20</sub> H <sub>12</sub> O <sub>2</sub>                |
| Formula weight                              | 284.30                                                        |
| Temperature/K                               | 100.00                                                        |
| Crystal system                              | monoclinic                                                    |
| Space group                                 | P2 <sub>1</sub> /c                                            |
| a/Å                                         | 16.0281(2)                                                    |
| b/Å                                         | 5.29640(10)                                                   |
| c/Å                                         | 16.7488(2)                                                    |
| α/°                                         | 90                                                            |
| β/°                                         | 99.9850(10)                                                   |
| γ/°                                         | 90                                                            |
| Volume/Å <sup>3</sup>                       | 1400.29(4)                                                    |
| Z                                           | 4                                                             |
| ρ <sub>calc</sub> /cm <sup>3</sup>          | 1.349                                                         |
| μ/mm <sup>-1</sup>                          | 0.690                                                         |
| F(000)                                      | 592.0                                                         |
| Crystal size/mm <sup>3</sup>                | 0.26 × 0.07 × 0.03                                            |
| Radiation                                   | CuKα (λ = 1.54178)                                            |
| 2θ range for data collection/°              | 5.598 to 160.1                                                |
| Index ranges                                | -20 ≤ h ≤ 20, -6 ≤ k ≤ 6, -21 ≤ l ≤ 21                        |
| Reflections collected                       | 26828                                                         |
| Independent reflections                     | 3037 [R <sub>int</sub> = 0.0426, R <sub>sigma</sub> = 0.0206] |
| Data/restraints/parameters                  | 3037/0/199                                                    |
| Goodness-of-fit on F <sup>2</sup>           | 1.056                                                         |
| Final R indexes [I >= 2σ (I)]               | R <sub>1</sub> = 0.0359, wR <sub>2</sub> = 0.0946             |
| Final R indexes [all data]                  | R <sub>1</sub> = 0.0402, wR <sub>2</sub> = 0.0989             |
| Largest diff. peak/hole / e Å <sup>-3</sup> | 0.20/-0.24                                                    |

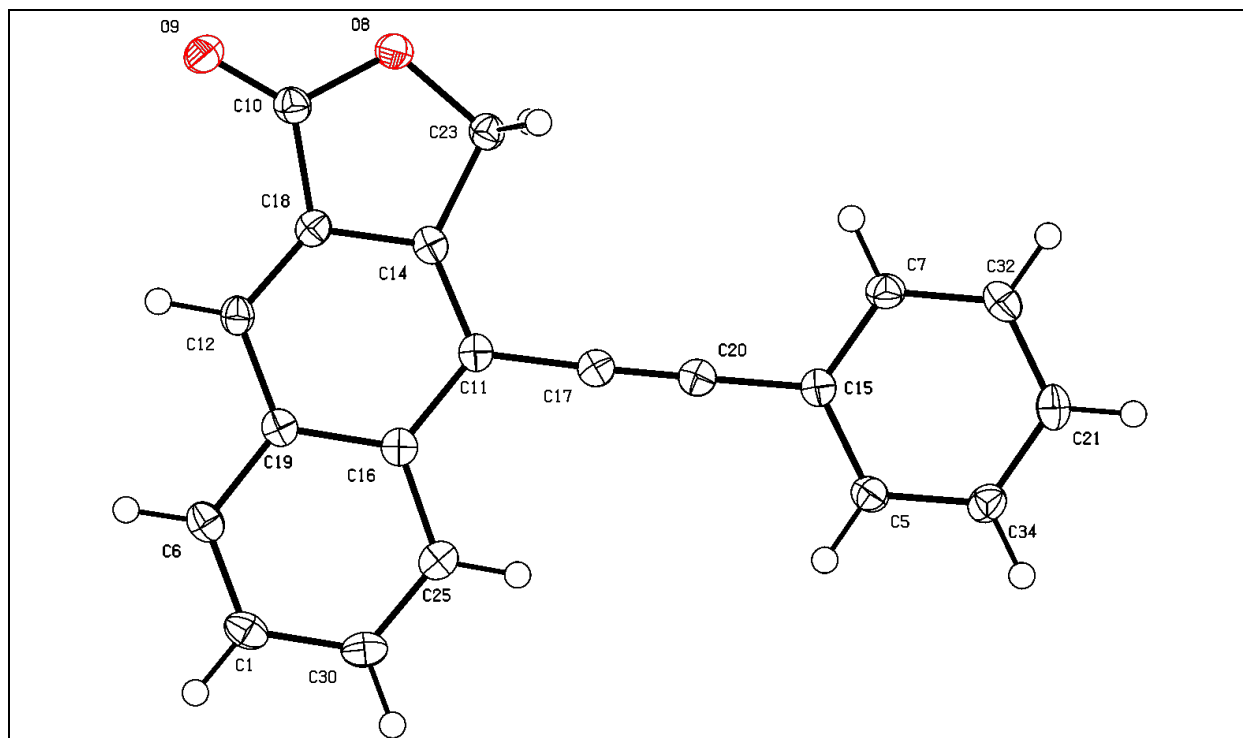

**Figure S2.** Ellipsoid plot of **4s**. Anisotropic displacement parameters were drawn at 50% probability level.  
CCDC: 2161061

| <b>Table S3 Crystal data and structure refinement for 5ab.</b> |                                                                 |
|----------------------------------------------------------------|-----------------------------------------------------------------|
| Identification code                                            | 5ab                                                             |
| Empirical formula                                              | C <sub>27</sub> H <sub>20</sub> N <sub>4</sub> O <sub>3</sub> S |
| Formula weight                                                 | 480.53                                                          |
| Temperature/K                                                  | 296.00                                                          |
| Crystal system                                                 | monoclinic                                                      |
| Space group                                                    | P2 <sub>1</sub> /c                                              |
| a/Å                                                            | 9.2159(2)                                                       |
| b/Å                                                            | 24.1709(5)                                                      |
| c/Å                                                            | 21.1041(4)                                                      |
| α/°                                                            | 90                                                              |
| β/°                                                            | 101.4372(7)                                                     |
| γ/°                                                            | 90                                                              |
| Volume/Å <sup>3</sup>                                          | 4607.73(16)                                                     |
| Z                                                              | 8                                                               |
| ρ <sub>calc</sub> /cm <sup>3</sup>                             | 1.385                                                           |
| μ/mm <sup>-1</sup>                                             | 1.565                                                           |
| F(000)                                                         | 2000.0                                                          |
| Crystal size/mm <sup>3</sup>                                   | 0.19 × 0.16 × 0.04                                              |
| Radiation                                                      | CuKα (λ = 1.54178)                                              |
| 2θ range for data collection/°                                 | 5.624 to 160.73                                                 |
| Index ranges                                                   | -11 ≤ h ≤ 11, -29 ≤ k ≤ 30, -26 ≤ l ≤ 26                        |
| Reflections collected                                          | 99565                                                           |
| Independent reflections                                        | 10021 [R <sub>int</sub> = 0.0503, R <sub>sigma</sub> = 0.0250]  |
| Data/restraints/parameters                                     | 10021/0/641                                                     |
| Goodness-of-fit on F <sup>2</sup>                              | 1.044                                                           |
| Final R indexes [I >= 2σ (I)]                                  | R <sub>1</sub> = 0.0430, wR <sub>2</sub> = 0.1153               |
| Final R indexes [all data]                                     | R <sub>1</sub> = 0.0522, wR <sub>2</sub> = 0.1242               |
| Largest diff. peak/hole / e Å <sup>-3</sup>                    | 0.31/-0.48                                                      |



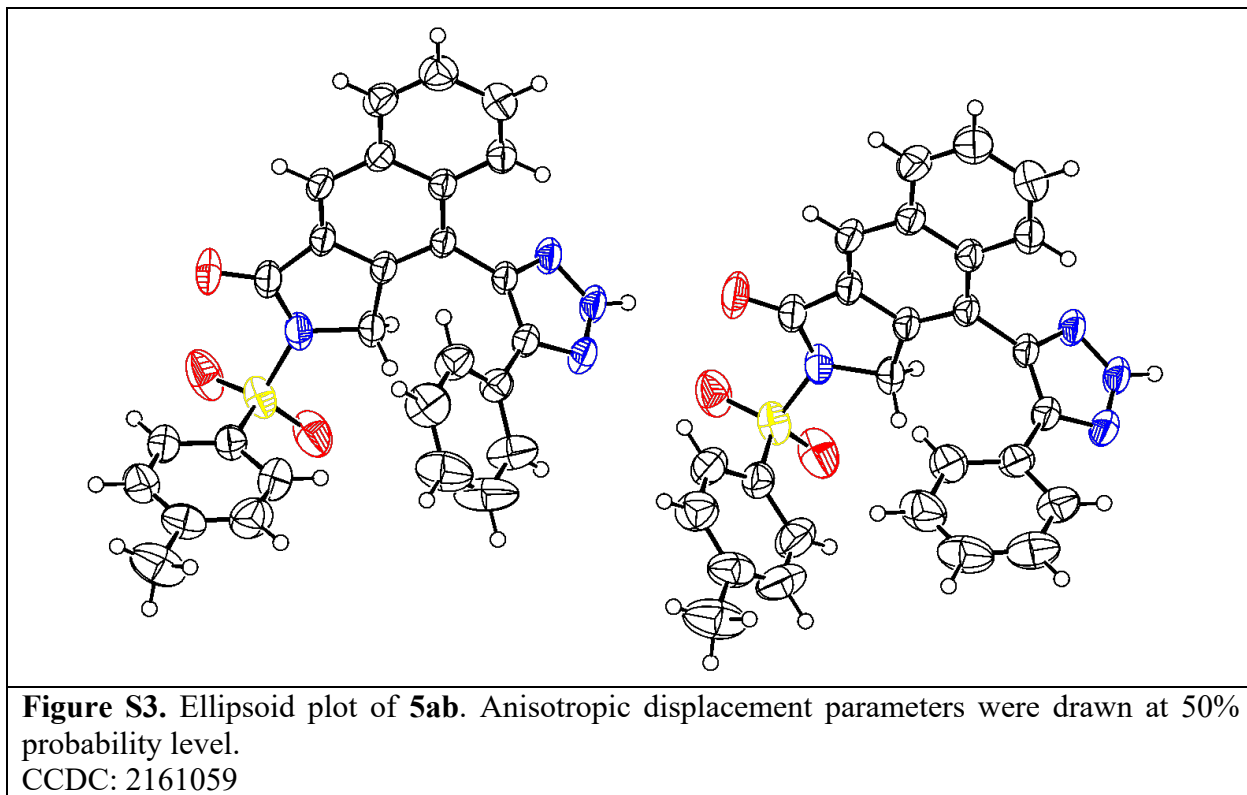

**Table S4 Crystal data and structure refinement for 6a.**

|                                             |                                                                                                                                                         |
|---------------------------------------------|---------------------------------------------------------------------------------------------------------------------------------------------------------|
| Identification code                         | 6a                                                                                                                                                      |
| Empirical formula                           | C <sub>45.91</sub> H <sub>38.84</sub> Cl <sub>1.83</sub> N <sub>3</sub> O <sub>7</sub> S                                                                |
| Moiety formula                              | C <sub>41</sub> H <sub>29</sub> N <sub>3</sub> O <sub>5</sub> S, C <sub>4</sub> H <sub>8</sub> O <sub>2</sub> , 0.916(CH <sub>2</sub> Cl <sub>2</sub> ) |
| Formula weight                              | 841.72                                                                                                                                                  |
| Temperature/K                               | 100.00                                                                                                                                                  |
| Crystal system                              | triclinic                                                                                                                                               |
| Space group                                 | P-1                                                                                                                                                     |
| a/Å                                         | 10.6653(3)                                                                                                                                              |
| b/Å                                         | 12.1532(3)                                                                                                                                              |
| c/Å                                         | 16.9707(5)                                                                                                                                              |
| α/°                                         | 70.450(1)                                                                                                                                               |
| β/°                                         | 89.007(1)                                                                                                                                               |
| γ/°                                         | 74.967(1)                                                                                                                                               |
| Volume/Å <sup>3</sup>                       | 1996.1(1)                                                                                                                                               |
| Z                                           | 2                                                                                                                                                       |
| ρ <sub>calc</sub> /cm <sup>3</sup>          | 1.400                                                                                                                                                   |
| μ/mm <sup>-1</sup>                          | 2.327                                                                                                                                                   |
| F(000)                                      | 877.0                                                                                                                                                   |
| Crystal size/mm <sup>3</sup>                | 0.2 × 0.13 × 0.03                                                                                                                                       |
| Radiation                                   | CuKα (λ = 1.54178)                                                                                                                                      |
| 2θ range for data collection/°              | 5.542 to 158.934                                                                                                                                        |
| Index ranges                                | -13 ≤ h ≤ 12, -15 ≤ k ≤ 15, -21 ≤ l ≤ 21                                                                                                                |
| Reflections collected                       | 40341                                                                                                                                                   |
| Independent reflections                     | 8344 [R <sub>int</sub> = 0.0364, R <sub>sigma</sub> = 0.0240]                                                                                           |
| Data/restraints/parameters                  | 8344/10/568                                                                                                                                             |
| Goodness-of-fit on F <sup>2</sup>           | 1.045                                                                                                                                                   |
| Final R indexes [I ≥ 2σ (I)]                | R <sub>1</sub> = 0.0367, wR <sub>2</sub> = 0.0946                                                                                                       |
| Final R indexes [all data]                  | R <sub>1</sub> = 0.0402, wR <sub>2</sub> = 0.0977                                                                                                       |
| Largest diff. peak/hole / e Å <sup>-3</sup> | 0.45/-0.48                                                                                                                                              |

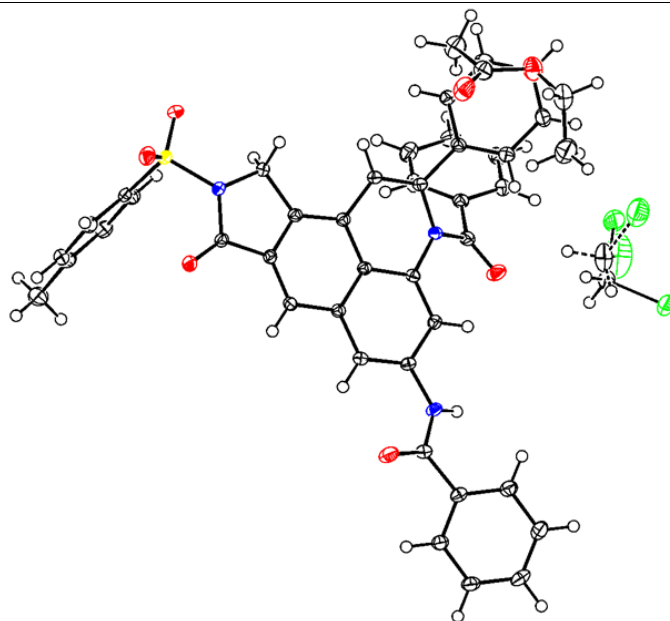

**Figure S4.** Ellipsoid plot of **6a**. Anisotropic displacement parameters were drawn at 50% probability level. Chloroform molecule is disordered.  
CCDC: 2161058

## VI. Compound Characterization

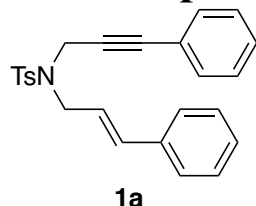

### *N*-cinnamyl-4-methyl-*N*-(3-phenylprop-2-yn-1-yl)benzenesulfonamide

**1a** was prepared following the Procedure 2.2 and purified by column chromatography (Hexane: Ethyl acetate = 10:1) in 75% yield as white solid.

**<sup>1</sup>H NMR** (600 MHz; CDCl<sub>3</sub>): δ 7.80 (dd, *J* = 8.4, 1.8 Hz, 2H), 7.36-7.23 (m, 10H), 7.09-7.07 (m, 2H), 6.61 (d, *J* = 15.8 Hz, 1H), 6.16 (dt, *J* = 15.8, 6.8 Hz, 1H), 4.34 (s, 2H), 4.06-4.05 (m, 2H), 2.35 (s, 3H).

**<sup>13</sup>C NMR** (151 MHz; CDCl<sub>3</sub>): δ 143.5, 136.17, 136.03, 134.9, 131.5, 129.6, 128.6, 128.4, 128.14, 128.06, 127.87, 126.6, 123.1, 122.2, 85.8, 81.8, 48.9, 36.9, 21.4

**HRMS** *m/z* (ESI) calcd. for C<sub>25</sub>H<sub>24</sub>NO<sub>2</sub>S<sup>+</sup> (M+H)<sup>+</sup> 402.1523, found 402.1540

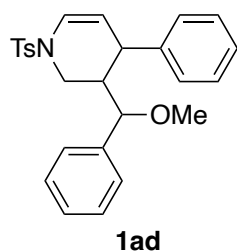

### 3-(methoxy(phenyl)methyl)-4-phenyl-1-tosyl-1,2,3,4-tetrahydropyridine

**1ad** was prepared following the Procedure 2.3 and purified by column chromatography (Hexane: Ethyl acetate = 10:1) in 85% yield as white solid.

**<sup>1</sup>H NMR** (600 MHz; CDCl<sub>3</sub>): δ 7.72 (d, *J* = 8.3 Hz, 2H), 7.34 (d, *J* = 7.9 Hz, 2H), 7.03-6.98 (m, 8H), 6.83-6.81 (m, 2H), 5.68 (t, *J* = 3.3 Hz, 1H), 4.31 (d, *J* = 7.4 Hz, 1H), 4.02 (td, *J* = 11.4, 3.7 Hz, 2H), 3.52 (dt, *J* = 16.9, 2.6 Hz, 1H), 3.12 (s, 4H), 2.77 (dd, *J* = 11.2, 3.6 Hz, 1H), 2.44 (s, 3H).

**<sup>13</sup>C NMR** (151 MHz; CDCl<sub>3</sub>): δ 143.6, 141.0, 139.0, 138.5, 133.2, 129.7, 127.78, 127.73, 127.4, 126.4, 126.2, 122.8, 83.2, 57.0, 45.6, 44.74, 44.58, 21.5

**HRMS** *m/z* (ESI) calcd. for C<sub>26</sub>H<sub>28</sub>NO<sub>3</sub>S<sup>+</sup> (M+H)<sup>+</sup> 434.1785, found 434.1785

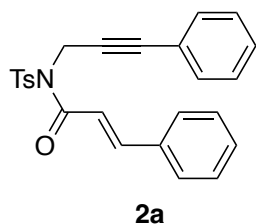

### *N*-(3-phenylprop-2-yn-1-yl)-*N*-tosylcinnamamide

**2a** was prepared following the Procedure 2.4 and purified by column chromatography (Hexane: Ethyl acetate = 5:1) in 83% yield as white solid.

**<sup>1</sup>H NMR** (600 MHz; CDCl<sub>3</sub>): δ 7.98 (d, *J* = 8.4 Hz, 2H), 7.71 (d, *J* = 15.4 Hz, 1H), 7.52-7.51 (m, 2H), 7.40-7.37 (m, 3H), 7.34 (dt, *J* = 6.1, 1.9 Hz, 2H), 7.32-7.27 (m, 4H), 4.98 (s, 2H), 2.37 (s, 3H).

**<sup>13</sup>C NMR** (151 MHz; CDCl<sub>3</sub>): δ 165.3, 146.6, 145.0, 136.7, 134.4, 131.8, 130.7, 129.7, 129.0, 128.59, 128.40, 128.24, 128.0, 122.3, 117.6, 84.3, 83.8, 36.3, 21.6

**HRMS** *m/z* (ESI) calcd. for C<sub>25</sub>H<sub>22</sub>NO<sub>3</sub>S<sup>+</sup> (M+H)<sup>+</sup> 416.1315, found 416.1311

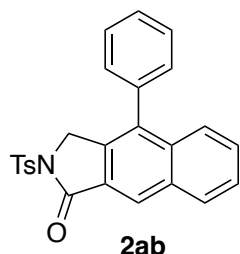

**4-phenyl-2-tosyl-2,3-dihydro-1H-benzo[f]isoindol-1-one**

**2ab** was prepared following the General Procedure 2.5 and purified by column chromatography (Hexane: Ethyl acetate = 5:1) in 45% yield as white solid.

**<sup>1</sup>H NMR** (600 MHz; CDCl<sub>3</sub>): δ 8.40 (s, 1H), 8.03 (d, *J* = 8.3 Hz, 3H), 7.72 (d, *J* = 8.2 Hz, 1H), 7.58-7.52 (m, 5H), 7.34 (t, *J* = 8.5 Hz, 4H), 4.80 (s, 2H), 2.42 (s, 3H).

**<sup>13</sup>C NMR** (151 MHz; CDCl<sub>3</sub>): δ 166.2, 145.2, 135.8, 135.41, 135.37, 134.9, 133.36, 133.30, 130.0, 129.8, 129.4, 129.1, 128.8, 128.5, 128.2, 127.4, 126.7, 126.0, 125.6, 49.6, 21.7

**HRMS** *m/z* (ESI) calcd. for C<sub>25</sub>H<sub>20</sub>NO<sub>3</sub>S<sup>+</sup> (M+H)<sup>+</sup> 414.1159, found 414.1182

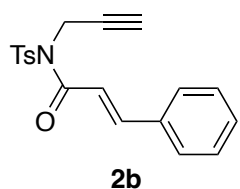

**N-(prop-2-yn-1-yl)-N-tosylcinnamamide**

**2b** was prepared following the General Procedure 2.6 and purified by column chromatography (Hexane: Ethyl acetate = 5:1) in 92% yield as white solid.

**<sup>1</sup>H NMR** (600 MHz; CDCl<sub>3</sub>): δ 7.93-7.92 (m, 2H), 7.69 (d, *J* = 15.4 Hz, 1H), 7.50-7.48 (m, 2H), 7.39 (td, *J* = 3.9, 2.5 Hz, 3H), 7.29 (q, *J* = 12.1 Hz, 3H), 4.75 (d, *J* = 2.4 Hz, 2H), 2.40 (s, 3H), 2.31 (t, *J* = 2.4 Hz, 1H).

**<sup>13</sup>C NMR** ((151 MHz; CDCl<sub>3</sub>): δ 165.2, 146.7, 145.2, 136.5, 134.3, 130.8, 129.8, 129.0, 128.4, 127.9, 117.4, 78.4, 72.6, 35.4, 21.7

**HRMS** *m/z* (ESI) calcd. for C<sub>19</sub>H<sub>18</sub>NO<sub>3</sub>S<sup>+</sup> (M+H)<sup>+</sup> 340.1002, found 340.0989

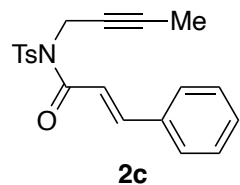

**N-(but-2-yn-1-yl)-N-tosylcinnamamide**

**2c** was prepared following the General Procedure 2.6 and purified by column chromatography (Hexane: Ethyl acetate = 5:1) in 83% yield as white solid.

<sup>1</sup>H NMR (600 MHz; CDCl<sub>3</sub>): δ 7.93 (d, *J* = 8.4 Hz, 2H), 7.68 (d, *J* = 15.4 Hz, 1H), 7.50 (dd, *J* = 6.5, 3.0 Hz, 2H), 7.39 (dt, *J* = 5.3, 2.8 Hz, 3H), 7.30 (d, *J* = 8.4 Hz, 2H), 7.26 (s, 1H), 4.70 (q, *J* = 2.3 Hz, 2H), 2.41 (s, 3H), 1.79 (t, *J* = 2.3 Hz, 3H).

<sup>13</sup>C NMR (151 MHz; CDCl<sub>3</sub>): δ 165.4, 146.4, 144.9, 136.7, 134.4, 130.7, 129.6, 128.9, 128.4, 128.0, 117.6, 80.7, 73.8, 36.1, 21.6, 3.6

HRMS *m/z* (ESI) calcd. for C<sub>20</sub>H<sub>20</sub>NO<sub>3</sub>S<sup>+</sup> (M+H)<sup>+</sup> 354.1159, found 354.1179

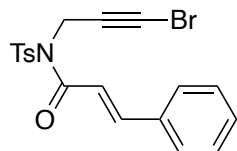

**2d**

#### *N*-(3-bromoprop-2-yn-1-yl)-*N*-tosylcinnamamide

**2d** was prepared following the General Procedure 2.6 and purified by column chromatography (Hexane: Ethyl acetate = 5:1) in 75% yield as white solid.

<sup>1</sup>H NMR (600 MHz; CDCl<sub>3</sub>): δ 7.88 (d, *J* = 8.4 Hz, 2H), 7.69 (d, *J* = 15.4 Hz, 1H), 7.52-7.50 (m, 2H), 7.40 (dq, *J* = 5.0, 2.5 Hz, 3H), 7.36 (d, *J* = 15.4 Hz, 1H), 7.32 (d, *J* = 8.2 Hz, 2H), 4.75 (s, 2H), 2.41 (s, 3H).

<sup>13</sup>C NMR (151 MHz; CDCl<sub>3</sub>): δ 165.2, 146.8, 145.2, 136.4, 134.3, 130.8, 129.8, 129.0, 128.4, 127.8, 117.4, 74.7, 44.6, 36.5, 21.7

HRMS *m/z* (ESI) calcd. for C<sub>19</sub>H<sub>17</sub>BrNO<sub>3</sub>S<sup>+</sup> (M+H)<sup>+</sup> 418.0108, found 418.0105

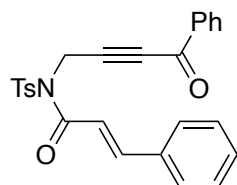

**2e**

#### *N*-(4-oxo-4-phenylbut-2-yn-1-yl)-*N*-tosylcinnamamide

**2e** was prepared following the General Procedure 2.6 and purified by column chromatography (Hexane: Ethyl acetate = 5:1) in 85% yield as white solid.

<sup>1</sup>H NMR (600 MHz; CDCl<sub>3</sub>): δ 8.02-8.01 (m, 2H), 7.94-7.92 (m, 2H), 7.73 (d, *J* = 15.5 Hz, 1H), 7.61-7.58 (m, 1H), 7.54-7.53 (m, 2H), 7.46-7.41 (m, 6H), 7.28-7.26 (m, 2H), 5.01 (s, 2H), 2.33 (s, 3H).

<sup>13</sup>C NMR (151 MHz; CDCl<sub>3</sub>): δ 177.1, 165.2, 147.1, 145.6, 136.29, 136.14, 134.28, 134.24, 130.9, 130.1, 129.6, 129.0, 128.59, 128.49, 127.8, 117.3, 88.6, 81.8, 35.7, 21.6

HRMS *m/z* (ESI) calcd. for C<sub>26</sub>H<sub>22</sub>NO<sub>4</sub>S<sup>+</sup> (M+H)<sup>+</sup> 444.1265, found 444.1275

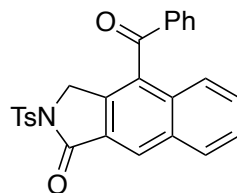

**2ea**

#### 4-benzoyl-2-tosyl-2,3-dihydro-1*H*-benzo[*f*]isoindol-1-one

**2ea** was prepared following the General Procedure 2.5 and purified by column chromatography (Hexane: Ethyl acetate = 5:1) in 53% yield (58% conversion) as white solid.

**<sup>1</sup>H NMR** (600 MHz; CDCl<sub>3</sub>): δ 8.50 (s, 1H), 8.06 (d, *J* = 8.1 Hz, 1H), 8.02 (d, *J* = 8.4 Hz, 2H), 7.80-7.78 (m, 2H), 7.70-7.66 (m, 2H), 7.59-7.55 (m, 2H), 7.49 (t, *J* = 7.8 Hz, 2H), 7.34 (d, *J* = 8.2 Hz, 2H), 4.88 (s, 2H), 2.42 (s, 3H).

**<sup>13</sup>C NMR** (151 MHz; CDCl<sub>3</sub>): δ 196.3, 165.3, 145.5, 136.6, 135.1, 134.7, 133.5, 133.26, 133.06, 132.5, 130.3, 129.94, 129.82, 129.64, 129.2, 128.2, 128.0, 127.6, 127.3, 125.8, 49.0, 21.7

**HRMS** *m/z* (ESI) calcd. for C<sub>26</sub>H<sub>20</sub>NO<sub>4</sub>S<sup>+</sup> (M+H)<sup>+</sup> 442.1108, found 442.1120

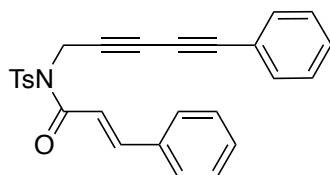

**3a**

***N*-(5-phenylpenta-2,4-diyne-1-yl)-*N*-tosylcinnamamide**

**3a** was prepared following the General Procedure 2.1 and purified by column chromatography (Hexane: Ethyl acetate = 5:1) in 84% yield as yellow solid.

**<sup>1</sup>H NMR** (600 MHz; CDCl<sub>3</sub>): δ 7.93 (d, *J* = 6.9 Hz, 2H), 7.71 (dd, *J* = 15.4, 0.9 Hz, 1H), 7.52 (dd, *J* = 5.2, 2.0 Hz, 2H), 7.47 (d, *J* = 8.1 Hz, 2H), 7.41-7.31 (m, 9H), 4.89 (d, *J* = 1.3 Hz, 2H), 2.39 (s, 3H).

**<sup>13</sup>C NMR** (151 MHz; CDCl<sub>3</sub>): δ 165.2, 146.9, 145.4, 136.3, 134.3, 132.6, 130.9, 129.9, 129.5, 129.0, 128.5, 127.9, 121.3, 117.3, 77.9, 73.3, 69.1, 36.4, 21.7

**HRMS** *m/z* (ESI) calcd. for C<sub>27</sub>H<sub>22</sub>NO<sub>3</sub>S<sup>+</sup> (M+H)<sup>+</sup> 440.1315, found 440.1313

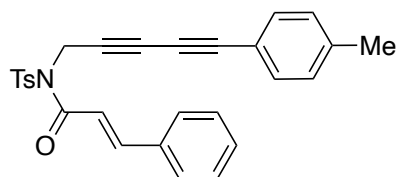

**3b**

***N*-(5-(*p*-tolyl)penta-2,4-diyne-1-yl)-*N*-tosylcinnamamide**

**3b** was prepared following the General Procedure 2.1 and purified by column chromatography (Hexane: Ethyl acetate = 5:1) in 85% yield as white solid.

**<sup>1</sup>H NMR** (600 MHz; CDCl<sub>3</sub>): δ 7.92 (d, *J* = 8.4 Hz, 2H), 7.70 (d, *J* = 15.4 Hz, 1H), 7.52 (dd, *J* = 6.5, 2.9 Hz, 2H), 7.40 (dd, *J* = 5.1, 1.7 Hz, 3H), 7.35 (q, *J* = 11.5 Hz, 5H), 7.13 (d, *J* = 8.1 Hz, 2H), 4.88 (s, 2H), 2.39 (s, 3H), 2.36 (s, 3H).

**<sup>13</sup>C NMR** (151 MHz; CDCl<sub>3</sub>): δ 165.2, 146.8, 145.3, 139.8, 136.4, 134.3, 132.6, 130.8, 129.9, 129.2, 129.0, 128.5, 127.9, 118.2, 117.4, 78.2, 76.7, 72.7, 69.3, 36.4, 21.68, 21.64

**HRMS** *m/z* (ESI) calcd. for C<sub>28</sub>H<sub>24</sub>NO<sub>3</sub>S<sup>+</sup> (M+H)<sup>+</sup> 454.1472, found 454.1500

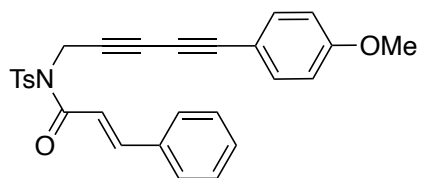

**3c**

***N*-(5-(4-methoxyphenyl)penta-2,4-diyne-1-yl)-*N*-tosylcinnamamide**

**3c** was prepared following the General Procedure 2.1 and purified by column chromatography (Hexane: Ethyl acetate = 5:1) in 80% yield as white solid.

**<sup>1</sup>H NMR** (600 MHz; CDCl<sub>3</sub>): δ 7.93-7.92 (m, 2H), 7.70 (d, *J* = 15.4 Hz, 1H), 7.52-7.51 (m, 2H), 7.43-7.40 (m, 5H), 7.35-7.32 (m, 3H), 6.85-6.83 (m, 2H), 4.88 (s, 2H), 3.82 (s, 3H), 2.39 (s, 3H).

**<sup>13</sup>C NMR** (151 MHz; CDCl<sub>3</sub>): δ 165.2, 160.5, 146.8, 145.2, 136.4, 134.35, 134.28, 130.8, 129.9, 129.0, 128.5, 127.9, 117.4, 114.2, 113.2, 78.1, 76.4, 72.2, 69.4, 55.4, 36.4, 21.7

**HRMS** *m/z* (ESI) calcd. for C<sub>28</sub>H<sub>24</sub>NO<sub>4</sub>S<sup>+</sup> (M+H)<sup>+</sup> 470.1421, found 470.1443

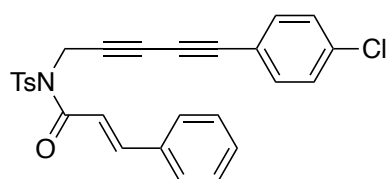

**3d**

***N*-(5-(4-chlorophenyl)penta-2,4-diyne-1-yl)-*N*-tosylcinnamamide**

**3d** was prepared following the General Procedure 2.1 and purified by column chromatography (Hexane: Ethyl acetate = 5:1) in 82% yield as white solid.

**<sup>1</sup>H NMR** (600 MHz; CDCl<sub>3</sub>): δ 7.92-7.90 (m, 2H), 7.71 (d, *J* = 15.4 Hz, 1H), 7.52 (dd, *J* = 7.2, 2.3 Hz, 2H), 7.42-7.39 (m, 5H), 7.37-7.29 (m, 5H), 4.88 (s, 2H), 2.40 (s, 3H).

**<sup>13</sup>C NMR** (151 MHz; CDCl<sub>3</sub>): δ 165.2, 146.9, 145.3, 136.4, 135.6, 134.3, 133.8, 130.8, 129.9, 129.00, 128.88, 128.5, 127.8, 119.8, 117.3, 77.7, 76.6, 74.3, 68.8, 36.4, 21.7

**HRMS** *m/z* (ESI) calcd. for C<sub>27</sub>H<sub>21</sub>ClNO<sub>3</sub>S<sup>+</sup> (M+H)<sup>+</sup> 474.0926, found 474.0949

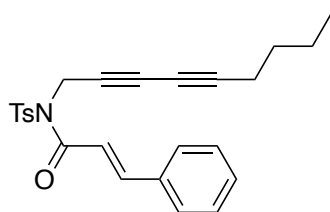

**3e**

***N*-(nona-2,4-diyne-1-yl)-*N*-tosylcinnamamide**

**3e** was prepared following the General Procedure 2.1 and purified by column chromatography (Hexane: Ethyl acetate = 5:1) in 90% yield as white solid.

**<sup>1</sup>H NMR** (600 MHz; CDCl<sub>3</sub>): δ 7.91 (d, *J* = 8.4 Hz, 2H), 7.68 (d, *J* = 15.4 Hz, 1H), 7.50 (dd, *J* = 7.1, 2.3 Hz, 2H), 7.40 (m, 3H), 7.31 (d, *J* = 8.1 Hz, 2H), 7.27 (d, *J* = 13.9 Hz, 1H), 4.79 (s, 2H), 2.41 (s, 3H), 2.26 (t, *J* = 7.0 Hz, 2H), 1.52-1.48 (m, 2H), 1.41 (ddd, *J* = 8.1, 7.0, 6.8 Hz, 2H), 0.91 (t, *J* = 7.3 Hz, 3H).

**<sup>13</sup>C NMR** (151 MHz; CDCl<sub>3</sub>): δ 165.2, 146.7, 145.1, 136.4, 134.3, 130.8, 129.8, 129.0, 128.4, 127.9, 117.4, 81.1, 70.0, 69.6, 64.5, 36.2, 30.1, 21.9, 21.7, 18.9, 13.5



HRMS m/z (ESI) calcd. for C<sub>25</sub>H<sub>26</sub>NO<sub>3</sub>S<sup>+</sup> (M+H)<sup>+</sup> 420.1628, found 420.1627

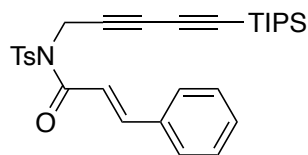

**3f**

***N*-tosyl-*N*-(5-(triisopropylsilyl)penta-2,4-diyne-1-yl)cinnamamide**

**3f** was prepared following the General Procedure 2.1 and purified by column chromatography (Hexane: Ethyl acetate = 5:1) in 79% yield as white solid.

<sup>1</sup>H NMR (600 MHz; CDCl<sub>3</sub>): δ 7.91 (d, *J* = 8.4 Hz, 2H), 7.70 (d, *J* = 15.4 Hz, 1H), 7.52 (dd, *J* = 7.2, 2.3 Hz, 2H), 7.41-7.36 (m, 4H), 7.31 (d, *J* = 8.1 Hz, 2H), 4.82 (s, 2H), 2.40 (s, 3H), 1.08 (s, 21H).

<sup>13</sup>C NMR (151 MHz; CDCl<sub>3</sub>): δ 165.2, 146.9, 145.2, 136.3, 134.3, 130.8, 129.8, 129.0, 128.5, 127.9, 117.4, 88.9, 84.2, 71.1, 69.7, 36.1, 21.6, 18.5, 11.2

HRMS m/z (ESI) calcd. for C<sub>30</sub>H<sub>38</sub>NO<sub>3</sub>SSi<sup>+</sup> (M+H)<sup>+</sup> 520.2337, found 520.2331

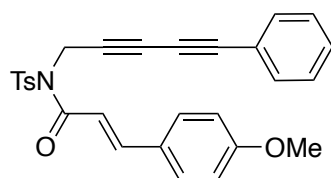

**3g**

***(E)*-3-(4-methoxyphenyl)-*N*-(5-phenylpenta-2,4-diyne-1-yl)-*N*-tosylacrylamide**

**3g** was prepared following the General Procedure 2.1 and purified by column chromatography (Hexane: Ethyl acetate = 5:1) in 76% yield as white solid.

<sup>1</sup>H NMR (600 MHz; CDCl<sub>3</sub>): δ 7.92 (d, *J* = 8.4 Hz, 2H), 7.68 (d, *J* = 15.4 Hz, 1H), 7.48 (dd, *J* = 8.4, 1.4 Hz, 4H), 7.34-7.32 (m, 5H), 7.21 (d, *J* = 15.3 Hz, 1H), 6.91 (d, *J* = 8.8 Hz, 2H), 4.88 (s, 2H), 3.85 (s, 3H), 2.39 (s, 3H).

<sup>13</sup>C NMR (151 MHz; CDCl<sub>3</sub>): δ 165.4, 161.9, 146.8, 145.2, 136.5, 132.6, 130.3, 129.8, 129.4, 128.4, 127.9, 127.1, 121.4, 114.7, 114.4, 77.8, 73.4, 72.5, 69.0, 55.4, 36.3, 21.7

HRMS m/z (ESI) calcd. for C<sub>28</sub>H<sub>24</sub>NO<sub>4</sub>S<sup>+</sup> (M+H)<sup>+</sup> 470.1421, found 470.1392

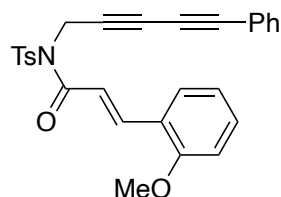

**3h**

***(E)*-3-(2-methoxyphenyl)-*N*-(5-phenylpenta-2,4-diyne-1-yl)-*N*-tosylacrylamide**

**3h** was prepared following the General Procedure 2.1 and purified by column chromatography (Hexane: Ethyl acetate = 5:1) in 75% yield as colorless oil.

<sup>1</sup>H NMR (600 MHz; CDCl<sub>3</sub>): δ 7.98-7.93 (m, 3H), 7.51 (d, *J* = 15.5 Hz, 1H), 7.47 (t, *J* = 7.4 Hz, 3H), 7.37 (t, *J* = 7.5 Hz, 2H), 7.33-7.31 (m, 4H), 6.97 (t, *J* = 7.5 Hz, 1H), 6.92 (d, *J* = 8.3 Hz, 1H), 4.89 (s, 2H), 3.90 (s, 3H), 2.39 (s, 3H).

$^{13}\text{C}$  NMR (151 MHz;  $\text{CDCl}_3$ ):  $\delta$  165.8, 158.9, 145.1, 142.8, 136.5, 132.6, 132.0, 130.2, 129.8, 129.4, 128.4, 128.0, 123.3, 121.4, 120.8, 118.0, 111.2, 77.8, 77.3, 73.4, 69.0, 55.5, 36.4, 21.7  
HRMS  $m/z$  (ESI) calcd. for  $\text{C}_{28}\text{H}_{24}\text{NO}_4\text{S}^+$  ( $\text{M}+\text{H}$ ) $^+$  470.1421, found 470.1439

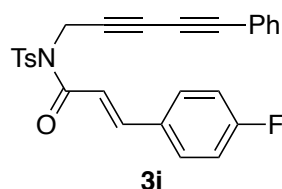

**(E)-3-(4-fluorophenyl)-N-(5-phenylpenta-2,4-diyne-1-yl)-N-tosylacrylamide**

**3i** was prepared following the General Procedure 2.1 and purified by column chromatography (Hexane: Ethyl acetate = 5:1) in 92% yield as white solid.

$^1\text{H}$  NMR (600 MHz;  $\text{CDCl}_3$ ):  $\delta$  7.91 (d,  $J$  = 8.4 Hz, 2H), 7.67 (d,  $J$  = 15.4 Hz, 1H), 7.52-7.50 (m, 2H), 7.48-7.47 (m, 2H), 7.39-7.27 (m, 6H), 7.11-7.08 (m, 2H), 4.87 (s, 2H), 2.40 (s, 3H).

$^{13}\text{C}$  NMR (151 MHz;  $\text{CDCl}_3$ ):  $\delta$  165.09, 164.31 ( $J$  = 252.5 Hz), 145.43 ( $J$  = 20.6 Hz), 136.3, 132.6, 130.61 ( $J$  = 3.6 Hz), 130.39 ( $J$  = 8.7 Hz), 129.9, 129.4, 128.5, 127.8, 121.3, 117.17 ( $J$  = 1.8 Hz), 116.28, 116.13, 77.9, 77.0, 73.3, 69.1, 36.4, 21.7

$^{19}\text{F}$  NMR (564 MHz;  $\text{CDCl}_3$ ):  $\delta$  -108.48

HRMS  $m/z$  (ESI) calcd. for  $\text{C}_{27}\text{H}_{21}\text{FNO}_3\text{S}^+$  ( $\text{M}+\text{H}$ ) $^+$  458.1221, found 458.1221

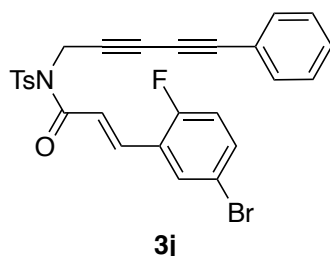

**(E)-3-(5-bromo-2-fluorophenyl)-N-(5-phenylpenta-2,4-diyne-1-yl)-N-tosylacrylamide**

**3j** was prepared following the General Procedure 2.1 and purified by column chromatography (Hexane: Ethyl acetate = 5:1) in 78% yield as white solid.

$^1\text{H}$  NMR (600 MHz;  $\text{CDCl}_3$ ):  $\delta$  7.93-7.92 (m, 2H), 7.68 (d,  $J$  = 15.6 Hz, 1H), 7.58 (dd,  $J$  = 6.4, 2.4 Hz, 1H), 7.47 (ddt,  $J$  = 8.4, 6.6, 1.7 Hz, 3H), 7.42 (d,  $J$  = 15.6 Hz, 1H), 7.38 (t,  $J$  = 7.5 Hz, 3H), 7.32 (td,  $J$  = 7.4, 1.3 Hz, 2H), 7.01 (dd,  $J$  = 10.0, 8.9 Hz, 1H), 4.89 (s, 2H), 2.42 (s, 3H).

$^{13}\text{C}$  NMR (151 MHz;  $\text{CDCl}_3$ ):  $\delta$  164.7, 160.42 (d,  $J$  = 255.2 Hz), 145.5, 137.7, 136.2, 134.67 (d,  $J$  = 8.8 Hz), 132.6, 132.17 (d,  $J$  = 3.1 Hz), 130.0, 129.4, 128.5, 127.9, 124.43 (d,  $J$  = 13.0 Hz), 121.42 (d,  $J$  = 7.6 Hz), 121.28, 118.09 (d,  $J$  = 23.3 Hz), 117.10 (d,  $J$  = 3.2 Hz), 77.9, 73.2, 69.2, 36.4, 21.7

$^{19}\text{F}$  NMR (564 MHz;  $\text{CDCl}_3$ ):  $\delta$  -115.5

HRMS  $m/z$  (ESI) calcd. for  $\text{C}_{27}\text{H}_{20}\text{BrFNO}_3\text{S}^+$  ( $\text{M}+\text{H}$ ) $^+$  536.0326, found 536.0309

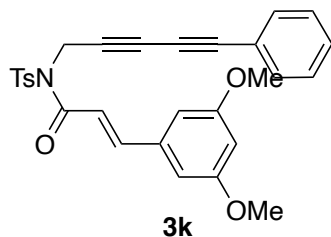

**(E)-3-(3,5-dimethoxyphenyl)-N-(5-phenylpenta-2,4-diyne-1-yl)-N-tosylacrylamide**

**3k** was prepared following the General Procedure 2.1 and purified by column chromatography (Hexane: Ethyl acetate = 5:1) in 83% yield as white solid.

<sup>1</sup>H NMR (600 MHz; CDCl<sub>3</sub>): δ 7.94 (d, *J* = 8.4 Hz, 2H), 7.64 (d, *J* = 15.4 Hz, 1H), 7.51-7.49 (m, 2H), 7.40-7.31 (m, 6H), 6.67 (d, *J* = 2.2 Hz, 2H), 6.54 (t, *J* = 2.2 Hz, 1H), 4.90 (s, 2H), 3.84 (s, 6H), 2.43 (s, 3H).

<sup>13</sup>C NMR (151 MHz; CDCl<sub>3</sub>): δ 165.1, 161.0, 146.8, 145.3, 136.35, 136.21, 132.6, 129.9, 129.4, 128.4, 127.9, 121.3, 118.0, 106.43, 106.37, 102.9, 77.9, 73.3, 69.1, 55.51, 55.46, 36.4, 21.7

HRMS *m/z* (ESI) calcd. for C<sub>29</sub>H<sub>26</sub>NO<sub>5</sub>S+ (M+H)<sup>+</sup> 500.1527, found 500.1520

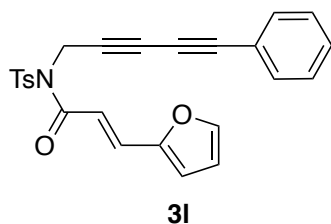

**(E)-3-(furan-2-yl)-N-(5-phenylpenta-2,4-diyne-1-yl)-N-tosylacrylamide**

**3l** was prepared following the General Procedure 2.1 and purified by column chromatography (Hexane: Ethyl acetate = 5:1) in 82% yield as white solid.

<sup>1</sup>H NMR (600 MHz; CDCl<sub>3</sub>): δ 7.95 (d, *J* = 8.4 Hz, 2H), 7.53 (d, *J* = 1.3 Hz, 1H), 7.49-7.45 (m, 3H), 7.38-7.31 (m, 5H), 7.19 (d, *J* = 15.1 Hz, 1H), 6.65 (d, *J* = 3.4 Hz, 1H), 6.49 (dd, *J* = 3.4, 1.8 Hz, 1H), 4.89 (s, 2H), 2.41 (s, 3H).

<sup>13</sup>C NMR (151 MHz; CDCl<sub>3</sub>): δ 165.1, 151.0, 145.40, 145.20, 136.3, 132.9, 132.6, 129.8, 129.4, 128.49, 128.45, 128.1, 121.3, 116.5, 114.5, 112.6, 77.8, 77.1, 73.3, 69.0, 36.3, 21.7

HRMS *m/z* (ESI) calcd. for C<sub>25</sub>H<sub>20</sub>NO<sub>4</sub>S+ (M+H)<sup>+</sup> 430.1108, found 430.1102

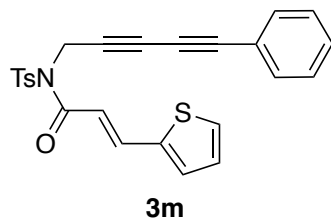

**(E)-N-(5-phenylpenta-2,4-diyne-1-yl)-3-(thiophen-2-yl)-N-tosylacrylamide**

**3m** was prepared following the General Procedure 2.1 and purified by column chromatography (Hexane: Ethyl acetate = 5:1) in 85% yield as white solid.

<sup>1</sup>H NMR (600 MHz; CDCl<sub>3</sub>): δ 7.94-7.93 (m, 2H), 7.80 (d, *J* = 15.1 Hz, 1H), 7.49-7.47 (m, 2H), 7.42 (d, *J* = 5.1 Hz, 1H), 7.37-7.31 (m, 5H), 7.27 (s, 1H), 7.12 (d, *J* = 15.1 Hz, 1H), 7.06 (dd, *J* = 5.1, 3.7 Hz, 1H), 4.89 (s, 2H), 2.40 (s, 3H).

$^{13}\text{C}$  NMR (151 MHz;  $\text{CDCl}_3$ ):  $\delta$  164.9, 145.3, 139.7, 139.2, 136.4, 132.6, 132.1, 129.9, 129.40, 129.35, 128.44, 128.34, 127.9, 121.3, 116.0, 77.8, 77.1, 73.3, 69.0, 36.2, 21.7

HRMS  $m/z$  (ESI) calcd. for  $\text{C}_{25}\text{H}_{20}\text{NO}_3\text{S}_2^+$  ( $\text{M}+\text{H}$ ) $^+$  446.0880, found 446.0878

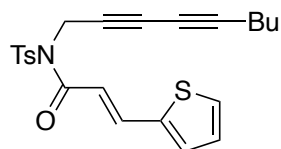

**3n**

**(E)-N-(nona-2,4-diyn-1-yl)-3-(thiophen-2-yl)-N-tosylacrylamide**

**3n** was prepared following the General Procedure 2.1 and purified by column chromatography (Hexane: Ethyl acetate = 5:1) in 85% yield as white solid.

$^1\text{H}$  NMR (600 MHz;  $\text{CDCl}_3$ ):  $\delta$  7.93-7.91 (m, 2H), 7.77 (d,  $J = 15.1$  Hz, 1H), 7.42 (d,  $J = 5.1$  Hz, 1H), 7.33 (d,  $J = 8.1$  Hz, 2H), 7.25 (d,  $J = 3.6$  Hz, 1H), 7.08-7.05 (m, 2H), 4.79 (s, 2H), 2.41 (s, 3H), 2.27 (t,  $J = 7.0$  Hz, 2H), 1.52-1.48 (m, 2H), 1.42 (td,  $J = 8.2, 5.7$  Hz, 2H), 0.92 (t,  $J = 7.3$  Hz, 3H).

$^{13}\text{C}$  NMR (151 MHz;  $\text{CDCl}_3$ ):  $\delta$  164.8, 145.1, 139.7, 139.0, 136.4, 132.0, 129.8, 129.3, 128.3, 128.0, 116.0, 81.0, 70.1, 69.5, 64.5, 36.1, 30.1, 21.9, 21.7, 18.9, 13.5

HRMS  $m/z$  (ESI) calcd. for  $\text{C}_{23}\text{H}_{24}\text{NO}_3\text{S}_2^+$  ( $\text{M}+\text{H}$ ) $^+$  426.1193, found 426.1199

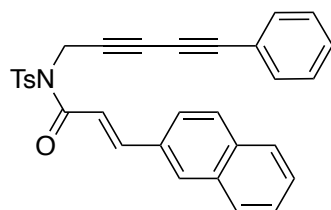

**3o**

**(E)-3-(naphthalen-2-yl)-N-(5-phenylpenta-2,4-diyn-1-yl)-N-tosylacrylamide**

**3o** was prepared following the General Procedure 2.1 and purified by column chromatography (Hexane: Ethyl acetate = 10:1) in 73% yield as white solid.

$^1\text{H}$  NMR (600 MHz;  $\text{CDCl}_3$ ):  $\delta$  7.95 (d,  $J = 8.4$  Hz, 2H), 7.91 (s, 1H), 7.86 (q,  $J = 8.0$  Hz, 4H), 7.66 (dd,  $J = 8.6, 1.3$  Hz, 1H), 7.55-7.51 (m, 2H), 7.49-7.46 (m, 3H), 7.38-7.31 (m, 5H), 4.91 (s, 2H), 2.38 (s, 3H).

$^{13}\text{C}$  NMR (151 MHz;  $\text{CDCl}_3$ ):  $\delta$  165.3, 147.0, 145.3, 136.4, 134.5, 133.2, 132.6, 131.8, 130.8, 129.9, 129.4, 128.85, 128.72, 128.4, 127.91, 127.81, 127.6, 126.9, 123.5, 121.3, 117.5, 77.9, 77.1, 73.3, 69.1, 36.4, 21.7.

HRMS  $m/z$  (ESI) calcd. for  $\text{C}_{31}\text{H}_{24}\text{NO}_3\text{S}^+$  ( $\text{M}+\text{H}$ ) $^+$  490.1471, found 490.1465

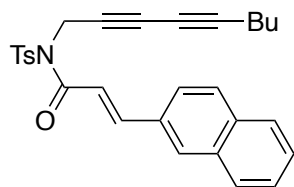

**3p**

**(E)-3-(naphthalen-2-yl)-N-(nona-2,4-diyn-1-yl)-N-tosylacrylamide**

**3p** was prepared following the General Procedure 2.1 and purified by column chromatography (Hexane: Ethyl acetate = 10:1) in 83% yield as white solid.

**<sup>1</sup>H NMR** (600 MHz; CDCl<sub>3</sub>): δ 7.94 (d, *J* = 8.4 Hz, 2H), 7.90 (s, 1H), 7.85 (dt, *J* = 12.9, 8.1 Hz, 4H), 7.65 (dd, *J* = 8.6, 1.6 Hz, 1H), 7.55-7.51 (m, 2H), 7.41 (d, *J* = 15.4 Hz, 1H), 7.32 (d, *J* = 8.2 Hz, 2H), 4.82 (s, 2H), 2.40 (s, 3H), 2.27 (t, *J* = 7.0 Hz, 2H), 1.53-1.48 (m, 2H), 1.44-1.38 (m, 2H), 0.91 (t, *J* = 7.3 Hz, 3H).

**<sup>13</sup>C NMR** (151 MHz; CDCl<sub>3</sub>): δ 165.2, 146.8, 145.2, 136.4, 134.4, 133.2, 131.8, 130.7, 129.8, 128.83, 128.71, 127.96, 127.81, 127.6, 126.9, 123.5, 117.4, 81.1, 70.0, 69.6, 64.5, 36.2, 30.1, 21.9, 21.7, 18.9, 13.5

**HRMS** *m/z* (ESI) calcd. for C<sub>29</sub>H<sub>28</sub>NO<sub>3</sub>S<sup>+</sup> (M+H)<sup>+</sup> 470.1785, found 470.1807

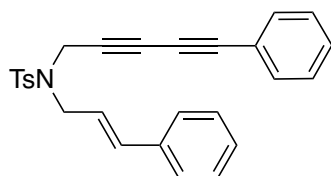

**3q**

***N*-cinnamyl-4-methyl-*N*-(5-phenylpenta-2,4-diyne-1-yl)benzenesulfonamide**

**3q** was prepared following the General Procedure 2.1 and purified by column chromatography (Hexane: Ethyl acetate = 10:1) in 86% yield as white solid.

**<sup>1</sup>H NMR** (600 MHz; CDCl<sub>3</sub>): δ 7.79-7.78 (m, 2H), 7.47-7.45 (m, 2H), 7.40-7.30 (m, 9H), 7.27 (t, *J* = 1.3 Hz, 1H), 6.60 (d, *J* = 15.8 Hz, 1H), 6.10 (dt, *J* = 15.8, 6.9 Hz, 1H), 4.26 (s, 2H), 4.00 (dd, *J* = 6.8, 0.7 Hz, 2H), 2.41 (s, 3H).

**<sup>13</sup>C NMR** (151 MHz, CDCl<sub>3</sub>): δ 143.9, 136.1, 135.6, 135.2, 132.5, 129.7, 129.4, 128.64, 128.49, 128.1, 127.8, 126.6, 122.8, 121.3, 77.4, 75.6, 73.1, 70.4, 49.1, 36.9, 21.6.

**HRMS** *m/z* (ESI) calcd. for C<sub>27</sub>H<sub>24</sub>NO<sub>2</sub>S<sup>+</sup> (M+H)<sup>+</sup> 426.1522, found 426.1525

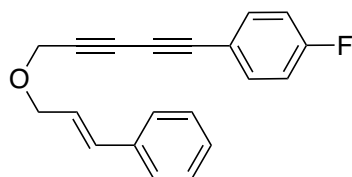

**3r**

**1-(5-(cinnamyloxy)penta-1,3-diyne-1-yl)-4-fluorobenzene**

**3r** was prepared following the General Procedure 2.1 and purified by column chromatography (Hexane: Ethyl acetate = 5:1) in 72% yield as white solid.

**<sup>1</sup>H NMR** (600 MHz; CDCl<sub>3</sub>): δ 7.50-7.47 (m, 2H), 7.40 (d, *J* = 7.4 Hz, 2H), 7.33-7.31 (m, 2H), 7.26-7.24 (m, 1H), 7.03-7.01 (m, 2H), 6.67 (d, *J* = 15.9 Hz, 1H), 6.28 (dt, *J* = 15.9, 6.2 Hz, 1H), 4.34 (s, 2H), 4.27 (dd, *J* = 6.2, 1.3 Hz, 2H).

**<sup>13</sup>C NMR** (151 MHz, CDCl<sub>3</sub>): δ 163.06 (d, *J* = 251.6 Hz), 136.5, 134.67 (d, *J* = 8.3 Hz), 133.7, 128.6, 127.9, 126.6, 124.9, 117.6, 115.88 (d, *J* = 22.0 Hz), 78.8, 73.2, 70.9, 70.4, 70.2, 57.7

**<sup>19</sup>F NMR** (564 MHz, Chloroform-*d*) δ -108.4

**HRMS** *m/z* (ESI) calcd. for C<sub>20</sub>H<sub>16</sub>FO<sup>+</sup> (M+H)<sup>+</sup> 291.1180, found 291.1188

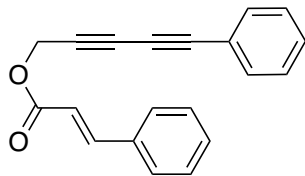

**3s**

**5-phenylpenta-2,4-diyne-1-yl cinnamate**

**3s** was prepared following the General Procedure 2.1 and purified by column chromatography (Hexane: Ethyl acetate = 5:1) in 90% yield as white solid.

<sup>1</sup>H NMR (600 MHz; CDCl<sub>3</sub>): δ 7.76 (d, *J* = 16.0 Hz, 1H), 7.54 (dd, *J* = 6.7, 2.9 Hz, 2H), 7.50-7.49 (m, 2H), 7.41-7.39 (m, 3H), 7.38-7.36 (m, 1H), 7.33-7.31 (m, 2H), 6.47 (d, *J* = 16.0 Hz, 1H), 4.96 (s, 2H).

<sup>13</sup>C NMR (151 MHz; CDCl<sub>3</sub>): δ 166.0, 146.1, 134.2, 132.7, 130.6, 129.5, 129.0, 128.5, 128.2, 121.2, 116.9, 78.8, 76.3, 73.1, 71.3, 52.7

HRMS *m/z* (ESI) calcd. for C<sub>20</sub>H<sub>15</sub>O<sub>2</sub><sup>+</sup> (M+H)<sup>+</sup> 287.1067, found 287.1075

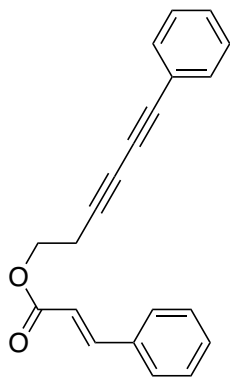

**3t**

**6-phenylhexa-3,5-diyne-1-yl cinnamate**

**3t** was prepared following the General Procedure 2.1 and purified by column chromatography (Hexane: Ethyl acetate = 5:1) in 76% yield as white solid.

<sup>1</sup>H NMR (600 MHz; CDCl<sub>3</sub>): δ 7.73 (d, *J* = 16.0 Hz, 1H), 7.55-7.53 (m, 2H), 7.48 (dd, *J* = 8.2, 1.3 Hz, 2H), 7.39 (t, *J* = 3.2 Hz, 3H), 7.35-7.29 (m, 3H), 6.47 (d, *J* = 16.0 Hz, 1H), 4.35 (t, *J* = 6.7 Hz, 2H), 2.79 (t, *J* = 6.7 Hz, 2H).

<sup>13</sup>C NMR (151 MHz; CDCl<sub>3</sub>): δ 145.5, 134.3, 132.6, 130.4, 129.06, 128.91, 128.4, 128.2, 121.7, 117.6, 79.9, 75.5, 74.0, 66.6, 61.9, 20.3

HRMS *m/z* (ESI) calcd. for C<sub>21</sub>H<sub>17</sub>O<sub>2</sub><sup>+</sup> (M+H)<sup>+</sup> 301.1224, found 301.1220

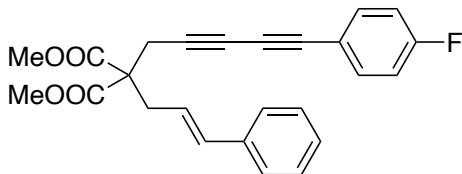

**3u**

**dimethyl 2-cinnamyl-2-(5-(4-fluorophenyl)penta-2,4-diyne-1-yl)malonate**

**3u** was prepared following the General Procedure 2.1 and purified by column chromatography (Hexane: Ethyl acetate = 5:1) in 78% yield as colorless oil.

<sup>1</sup>H NMR (600 MHz; CDCl<sub>3</sub>): δ 7.47 (ddd, *J* = 9.5, 5.1, 2.4 Hz, 2H), 7.35-7.34 (m, 2H), 7.31-7.28 (m, 2H), 7.24-7.21 (m, 1H), 7.01 (ddt, *J* = 8.7, 6.7, 2.2 Hz, 2H), 6.55 (d, *J* = 15.7 Hz, 1H), 6.02 (dt, *J* = 15.6, 7.7 Hz, 1H), 3.78 (s, 6H), 3.03 (s, 2H), 2.99 (dd, *J* = 7.7, 1.0 Hz, 2H).

<sup>13</sup>C NMR (151 MHz; CDCl<sub>3</sub>): δ 169.9, 162.82 (*J* = 251.0 Hz), 136.9, 134.9, 134.63, 134.58, 128.5, 127.6, 126.4, 122.9, 115.82 (*J* = 21.8 Hz), 78.5, 74.6, 73.8, 68.0, 57.4, 53.0, 36.3, 24.2

<sup>19</sup>F NMR (564 MHz; CDCl<sub>3</sub>): δ -108.82

HRMS *m/z* (ESI) calcd. for C<sub>25</sub>H<sub>22</sub>FO<sub>4</sub><sup>+</sup> (M+H)<sup>+</sup> 405.1497, found 405.1518

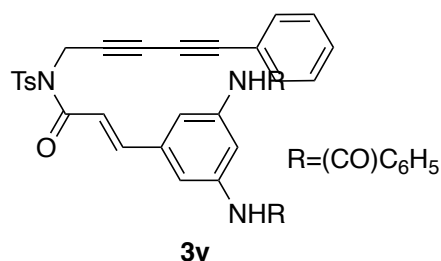

**(*E*)-*N,N'*-(5-(3-((4-methyl-*N*-(5-phenylpenta-2,4-diyne-1-yl)phenyl)sulfonamido)-3-oxoprop-1-en-1-yl)-1,3-phenylene)dibenzamide**

**3v** was prepared following the General Procedure 2.1 and purified by column chromatography (Hexane: Ethyl acetate = 5:1) in 65% yield as white solid.

<sup>1</sup>H NMR (600 MHz; CDCl<sub>3</sub>): δ 8.18 (s, 3H), 7.98 (d, *J* = 8.4 Hz, 2H), 7.88-7.87 (m, 4H), 7.62 (d, *J* = 1.8 Hz, 2H), 7.54 (t, *J* = 7.4 Hz, 3H), 7.48-7.46 (m, 6H), 7.38-7.36 (m, 3H), 7.33-7.31 (m, 3H), 4.87 (s, 2H), 2.39 (s, 3H).

<sup>13</sup>C NMR (151 MHz; CDCl<sub>3</sub>): δ 166.09, 166.07, 164.9, 145.8, 145.4, 139.2, 136.1, 135.7, 134.4, 132.6, 132.1, 130.1, 129.4, 128.8, 128.4, 128.0, 127.18, 127.14, 121.3, 118.5, 116.02, 115.99, 114.4, 77.9, 77.1, 73.3, 69.1, 36.3, 31.6, 21.7

HRMS *m/z* (ESI) calcd. for C<sub>41</sub>H<sub>32</sub>N<sub>3</sub>O<sub>5</sub>S<sup>+</sup> (M+H)<sup>+</sup> 678.2058, found 678.2047

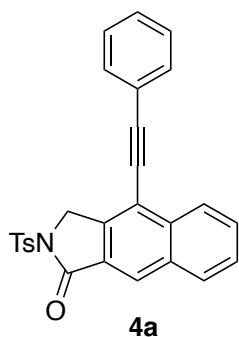

**4-(phenylethynyl)-2-tosyl-2,3-dihydro-1*H*-benzo[*f*]isoindol-1-one**

**4a** was prepared following the General Procedure 2.7 and purified by column chromatography (Hexane: Ethyl acetate = 5:1) in 90% yield as white solid.

<sup>1</sup>H NMR (600 MHz; CDCl<sub>3</sub>): δ 8.45 (d, *J* = 8.4 Hz, 1H), 8.30 (s, 1H), 8.09 (d, *J* = 8.4 Hz, 2H), 7.99 (d, *J* = 8.2 Hz, 1H), 7.72 (ddd, *J* = 8.3, 6.9, 1.3 Hz, 1H), 7.69-7.68 (m, 2H), 7.62-7.59 (m, 1H), 7.45 (dd, *J* = 6.4, 2.7 Hz, 3H), 7.36 (d, *J* = 8.2 Hz, 2H), 5.15 (s, 2H), 2.42 (s, 3H).

<sup>13</sup>C NMR (151 MHz; CDCl<sub>3</sub>): δ 165.8, 145.4, 138.1, 135.7, 135.4, 132.8, 131.9, 130.3, 129.8, 129.6, 129.3, 128.7, 128.2, 127.6, 127.4, 126.04, 126.03, 122.3, 116.5, 100.9, 82.6, 49.9, 21.7

HRMS *m/z* (ESI) calcd. for C<sub>27</sub>H<sub>20</sub>NO<sub>3</sub>S<sup>+</sup> (M+H)<sup>+</sup> 438.1159, found 438.1141

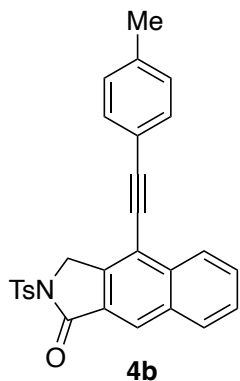

**4-(*p*-tolylethynyl)-2-tosyl-2,3-dihydro-1*H*-benzo[*f*]isoindol-1-one**

**4b** was prepared following the General Procedure 2.7 and purified by column chromatography (Hexane: Ethyl acetate = 5:1) in 92% yield as white solid.

<sup>1</sup>H NMR (600 MHz; CDCl<sub>3</sub>): δ 8.45 (d, *J* = 8.4 Hz, 1H), 8.29 (s, 1H), 8.09 (d, *J* = 8.3 Hz, 2H), 7.98 (d, *J* = 8.2 Hz, 1H), 7.71 (t, *J* = 7.6 Hz, 1H), 7.59 (dd, *J* = 17.8, 7.8 Hz, 3H), 7.35 (d, *J* = 8.2 Hz, 2H), 7.25 (d, *J* = 6.3 Hz, 2H), 5.15 (s, 2H), 2.43 (d, *J* = 9.2 Hz, 6H).

<sup>13</sup>C NMR (151 MHz; CDCl<sub>3</sub>): δ 165.8, 145.3, 139.7, 137.9, 135.6, 135.4, 132.8, 131.8, 130.2, 129.8, 129.48, 129.40, 128.2, 127.6, 127.3, 126.1, 125.8, 119.2, 116.7, 101.2, 82.1, 49.9, 21.70, 21.66

HRMS *m/z* (ESI) calcd. for C<sub>28</sub>H<sub>22</sub>NO<sub>3</sub>S<sup>+</sup> (M+H)<sup>+</sup> 452.1315, found 452.1301

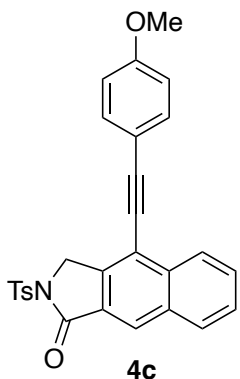

**4-((4-methoxyphenyl)ethynyl)-2-tosyl-2,3-dihydro-1*H*-benzo[*f*]isoindol-1-one**

**4c** was prepared following the General Procedure 2.7 and purified by column chromatography (Hexane: Ethyl acetate = 5:1) in 89% yield as white solid.

<sup>1</sup>H NMR (600 MHz; CDCl<sub>3</sub>): δ 8.44 (d, *J* = 8.4 Hz, 1H), 8.27 (s, 1H), 8.09 (d, *J* = 8.4 Hz, 2H), 7.97 (d, *J* = 8.2 Hz, 1H), 7.70 (ddd, *J* = 8.3, 7.0, 1.2 Hz, 1H), 7.62-7.58 (m, 3H), 7.35 (d, *J* = 8.3 Hz, 2H), 6.97-6.96 (m, 2H), 5.14 (s, 2H), 3.89 (s, 3H), 2.42 (s, 3H).

<sup>13</sup>C NMR (151 MHz; CDCl<sub>3</sub>): δ 165.9, 160.4, 145.3, 137.7, 135.59, 135.41, 133.4, 132.8, 130.2, 129.8, 129.4, 128.2, 127.5, 127.3, 126.1, 125.6, 116.9, 114.3, 101.2, 81.5, 55.4, 50.0, 21.7

HRMS *m/z* (ESI) calcd. for C<sub>28</sub>H<sub>22</sub>NO<sub>4</sub>S<sup>+</sup> (M+H)<sup>+</sup> 468.1265, found 468.1255



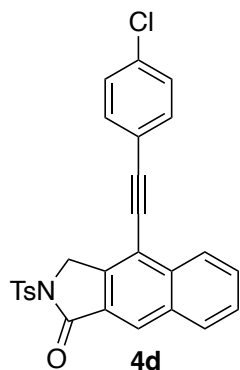

**4-((4-chlorophenyl)ethynyl)-2-tosyl-2,3-dihydro-1H-benzo[f]isoindol-1-one**

**4d** was prepared following the General Procedure 2.7 and purified by column chromatography (Hexane: Ethyl acetate = 5:1) in 83% yield as white solid.

<sup>1</sup>H NMR (600 MHz; CDCl<sub>3</sub>): δ 8.42 (d, *J* = 8.5 Hz, 1H), 8.32 (s, 1H), 8.09 (d, *J* = 8.3 Hz, 2H), 8.00 (dd, *J* = 8.0, 4.2 Hz, 1H), 7.73 (t, *J* = 7.6 Hz, 1H), 7.62 (t, *J* = 6.6 Hz, 3H), 7.43 (d, *J* = 8.2 Hz, 2H), 7.36 (d, *J* = 8.2 Hz, 2H), 5.15 (s, 2H), 2.42 (s, 3H).

<sup>13</sup>C NMR (151 MHz; CDCl<sub>3</sub>): δ 165.7, 145.4, 138.2, 135.61, 135.47, 135.33, 133.1, 132.8, 130.4, 129.83, 129.68, 129.0, 128.2, 127.61, 127.43, 126.3, 125.9, 120.7, 116.1, 99.6, 83.6, 49.9, 21.7

HRMS *m/z* (ESI) calcd. for C<sub>27</sub>H<sub>19</sub>ClNO<sub>3</sub>S<sup>+</sup> (M+H)<sup>+</sup> 472.0769, found 472.0797

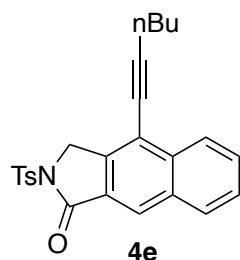

**4-(hex-1-yn-1-yl)-2-tosyl-2,3-dihydro-1H-benzo[f]isoindol-1-one**

**4e** was prepared following the General Procedure 2.7 and purified by column chromatography (Hexane: Ethyl acetate = 5:1) in 78% yield as white solid.

<sup>1</sup>H NMR (600 MHz; CDCl<sub>3</sub>): δ 8.35 (d, *J* = 8.3 Hz, 1H), 8.25 (s, 1H), 8.07 (d, *J* = 7.8 Hz, 2H), 7.95 (d, *J* = 8.1 Hz, 1H), 7.68 (t, *J* = 7.4 Hz, 1H), 7.57 (t, *J* = 7.2 Hz, 1H), 7.35 (d, *J* = 7.8 Hz, 2H), 5.06 (s, 2H), 2.65 (t, *J* = 6.9 Hz, 2H), 2.42 (s, 3H), 1.74 (q, *J* = 7.1 Hz, 2H), 1.60 (t, *J* = 7.6 Hz, 2H), 1.03 (t, *J* = 7.2 Hz, 3H).

<sup>13</sup>C NMR (151 MHz; CDCl<sub>3</sub>): δ 165.9, 145.3, 137.8, 136.0, 135.4, 132.8, 130.2, 129.8, 129.3, 128.2, 127.4, 127.1, 126.1, 125.2, 117.4, 102.8, 74.2, 50.0, 30.9, 22.2, 21.7, 19.6, 13.7

HRMS *m/z* (ESI) calcd. for C<sub>25</sub>H<sub>24</sub>NO<sub>3</sub>S<sup>+</sup> (M+H)<sup>+</sup> 418.1472, found 418.1437

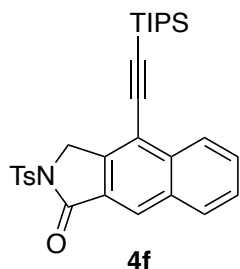

**2-tosyl-4-((triisopropylsilyl)ethynyl)-2,3-dihydro-1H-benzo[f]isoindol-1-one**

**4f** was prepared following the General Procedure 2.7 and purified by column chromatography (Hexane: Ethyl acetate = 5:1) in 76% yield as white solid.

$^1\text{H NMR}$  (600 MHz;  $\text{CDCl}_3$ ):  $\delta$  8.41 (d,  $J = 8.4$  Hz, 1H), 8.32 (s, 1H), 8.07 (d,  $J = 8.3$  Hz, 2H), 7.99 (d,  $J = 8.2$  Hz, 1H), 7.72 (dd,  $J = 8.2, 7.1$  Hz, 1H), 7.60 (t,  $J = 7.5$  Hz, 1H), 7.36 (d,  $J = 8.3$  Hz, 2H), 5.08 (s, 2H), 2.42 (s, 3H), 1.23 (d,  $J = 5.4$  Hz, 21H).

$^{13}\text{C NMR}$  (151 MHz;  $\text{CDCl}_3$ ):  $\delta$  165.7, 145.3, 138.8, 135.9, 135.4, 132.8, 130.3, 129.79, 129.67, 128.3, 127.5, 127.3, 126.13, 126.00, 116.7, 103.9, 99.8, 50.0, 21.7, 18.8, 11.3

**HRMS**  $m/z$  (ESI) calcd. for  $\text{C}_{30}\text{H}_{36}\text{NO}_3\text{SSi}^+$  ( $\text{M}+\text{H}$ ) $^+$  518.2180, found 518.2173

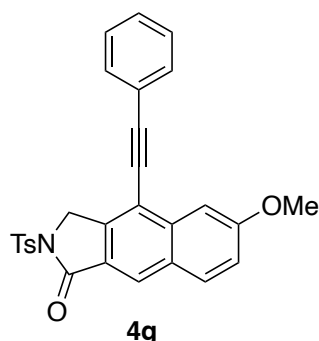

**6-methoxy-4-(phenylethynyl)-2-tosyl-2,3-dihydro-1H-benzo[f]isoindol-1-one**

**4g** was prepared following the General Procedure 2.7 and purified by column chromatography (Hexane: Ethyl acetate = 5:1) in 82% yield as white solid.

$^1\text{H NMR}$  (600 MHz;  $\text{CDCl}_3$ ):  $\delta$  8.22 (s, 1H), 8.08 (d,  $J = 8.2$  Hz, 2H), 7.87 (d,  $J = 9.0$  Hz, 1H), 7.71 (s, 1H), 7.66 (d,  $J = 3.5$  Hz, 2H), 7.45 (t,  $J = 2.5$  Hz, 3H), 7.35 (d,  $J = 8.1$  Hz, 2H), 7.25-7.24 (m, 1H), 5.13 (s, 2H), 4.01 (s, 3H), 2.42 (s, 3H).

$^{13}\text{C NMR}$  (151 MHz;  $\text{CDCl}_3$ ):  $\delta$  165.9, 160.8, 145.2, 139.1, 137.8, 135.5, 131.85, 131.78, 129.8, 129.2, 128.7, 128.33, 128.20, 125.8, 125.4, 122.4, 120.4, 114.6, 104.2, 100.6, 82.8, 55.5, 49.9, 21.7

**HRMS**  $m/z$  (ESI) calcd. for  $\text{C}_{28}\text{H}_{22}\text{NO}_4\text{S}^+$  ( $\text{M}+\text{H}$ ) $^+$  468.1264, found 468.1264

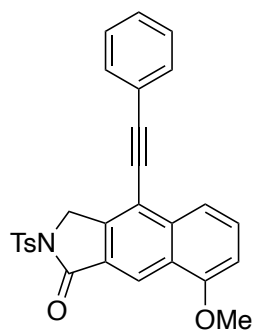

**8-methoxy-4-(phenylethynyl)-2-tosyl-2,3-dihydro-1H-benzo[f]isoindol-1-one**

**4h** was prepared following the General Procedure 2.7 and purified by column chromatography (Hexane: Ethyl acetate = 5:1) in 75% yield as white solid.

$^1\text{H NMR}$  (600 MHz;  $\text{CDCl}_3$ ):  $\delta$  8.70 (s, 1H), 8.08 (d,  $J = 8.3$  Hz, 2H), 7.93 (d,  $J = 8.5$  Hz, 1H), 7.66 (dd,  $J = 6.5, 2.9$  Hz, 2H), 7.58 (t,  $J = 8.1$  Hz, 1H), 7.43 (t,  $J = 3.2$  Hz, 3H), 7.35 (d,  $J = 8.3$  Hz, 2H), 6.87 (d,  $J = 7.7$  Hz, 1H), 5.09 (s, 2H), 4.00 (s, 3H), 2.41 (s, 3H).

$^{13}\text{C}$  NMR (151 MHz;  $\text{CDCl}_3$ ):  $\delta$  165.9, 157.2, 145.3, 138.7, 136.7, 135.5, 131.8, 130.1, 129.8, 129.2, 128.6, 128.2, 126.4, 125.4, 122.4, 121.0, 117.8, 115.6, 105.0, 100.5, 82.9, 55.8, 49.9, 21.7  
HRMS  $m/z$  (ESI) calcd. for  $\text{C}_{28}\text{H}_{22}\text{NO}_4\text{S}^+$  ( $\text{M}+\text{H}$ ) $^+$  468.1264, found 468.1260

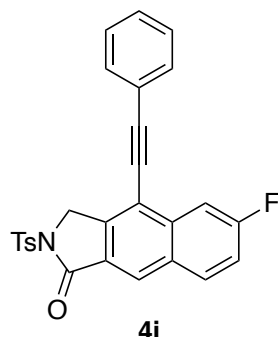

**6-fluoro-4-(phenylethynyl)-2-tosyl-2,3-dihydro-1H-benzo[f]isoindol-1-one**

**4i** was prepared following the General Procedure 2.7 and purified by column chromatography (Hexane: Ethyl acetate = 5:1) in 69% yield as white solid.

$^1\text{H}$  NMR (600 MHz;  $\text{CDCl}_3$ ): 8.32 (s, 1H), 8.09-8.06 (m, 3H), 8.02 (dd,  $J = 9.0, 5.6$  Hz, 1H), 7.68 (dt,  $J = 3.9, 2.7$  Hz, 2H), 7.46 (t,  $J = 3.2$  Hz, 3H), 7.40 (td,  $J = 8.5, 2.1$  Hz, 1H), 7.36 (d,  $J = 8.2$  Hz, 2H), 7.26 (s, 1H), 5.17 (s, 2H), 2.42 (s, 3H).

$^{13}\text{C}$  NMR (151 MHz;  $\text{CDCl}_3$ ):  $\delta$  165.5, 163.00 ( $J = 252.8$  Hz), 145.4, 139.1, 137.20 ( $J = 9.8$  Hz), 135.3, 132.94 ( $J = 9.5$  Hz), 131.9, 129.90, 129.84, 129.5, 128.7, 128.2, 127.29 ( $J = 2.9$  Hz), 125.9, 122.0, 118.10 ( $J = 26.0$  Hz), 116.06, 116.02, 110.01 ( $J = 22.8$  Hz), 101.3, 82.0, 60.4, 49.9, 21.7

$^{19}\text{F}$  NMR (564 MHz;  $\text{CDCl}_3$ ):  $\delta$  -107.19

HRMS  $m/z$  (ESI) calcd. for  $\text{C}_{27}\text{H}_{19}\text{FNO}_3\text{S}^+$  ( $\text{M}+\text{H}$ ) $^+$  456.1065, found 456.1058

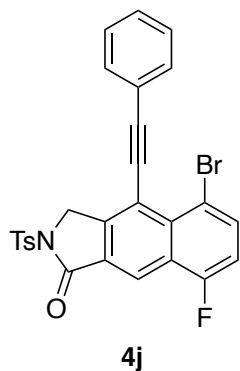

**5-bromo-8-fluoro-4-(phenylethynyl)-2-tosyl-2,3-dihydro-1H-benzo[f]isoindol-1-one**

**4j** was prepared following the General Procedure 2.7 and purified by column chromatography (Hexane: Ethyl acetate = 5:1) in 86% yield as white solid.

$^1\text{H}$  NMR (600 MHz;  $\text{CDCl}_3$ ):  $\delta$  8.60 (s, 1H), 8.09 (d,  $J = 7.9$  Hz, 2H), 7.92 (t,  $J = 6.7$  Hz, 1H), 7.65 (s, 2H), 7.46 (s, 3H), 7.37 (d,  $J = 8.0$  Hz, 2H), 7.11 (t,  $J = 8.7$  Hz, 1H), 5.14 (s, 2H), 2.43 (s, 3H).

$^{13}\text{C}$  NMR (151 MHz;  $\text{CDCl}_3$ ):  $\delta$  164.9, 145.6, 143.0, 135.88, 135.82, 135.1, 131.2, 129.9, 129.5, 128.7, 128.35, 128.30, 122.6, 119.33, 119.28, 115.02, 114.99, 111.50, 111.36, 106.6, 84.1, 50.7, 21.7

$^{19}\text{F}$  NMR (564 MHz;  $\text{CDCl}_3$ ):  $\delta$  -117.2

HRMS  $m/z$  (ESI) calcd. for  $\text{C}_{27}\text{H}_{18}\text{BrFNO}_3\text{S}^+$  ( $\text{M}+\text{H}$ ) $^+$  534.0169, found 534.0169

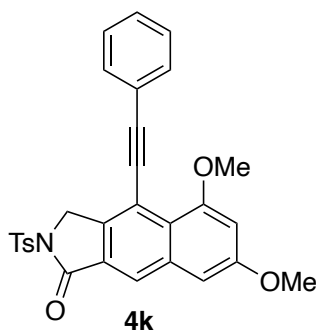

**5,7-dimethoxy-4-(phenylethynyl)-2-tosyl-2,3-dihydro-1H-benzo[f]isoindol-1-one**

**4k** was prepared following the General Procedure 2.7 and purified by column chromatography (Hexane: Ethyl acetate = 5:1) in 74% yield as white solid.

$^1\text{H NMR}$  (600 MHz;  $\text{CDCl}_3$ ):  $\delta$  8.08 (t,  $J = 4.2$  Hz, 3H), 7.63 (dd,  $J = 7.7, 1.6$  Hz, 2H), 7.45-7.42 (m, 3H), 7.36 (d,  $J = 8.2$  Hz, 2H), 6.81 (d,  $J = 2.2$  Hz, 1H), 6.66 (d,  $J = 2.2$  Hz, 1H), 5.08 (s, 2H), 4.02 (s, 3H), 3.92 (s, 3H), 2.42 (s, 3H).

$^{13}\text{C NMR}$  (151 MHz;  $\text{CDCl}_3$ ):  $\delta$  166.0, 158.7, 157.5, 145.3, 137.8, 136.1, 135.4, 131.7, 129.84, 129.80, 128.83, 128.64, 128.59, 128.24, 128.18, 124.1, 123.5, 123.3, 114.0, 101.7, 100.1, 99.6, 86.2, 55.9, 55.5, 50.3, 29.7, 21.7

**HRMS**  $m/z$  (ESI) calcd. for  $\text{C}_{29}\text{H}_{24}\text{NO}_5\text{S}^+$  ( $\text{M}+\text{H}$ ) $^+$  498.1370, found 498.1370

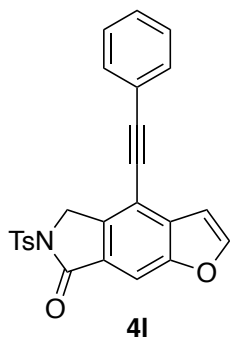

**4-(phenylethynyl)-6-tosyl-5,6-dihydro-7H-furo[2,3-f]isoindol-7-one**

**4l** was prepared following the General Procedure 2.7 and purified by column chromatography (Hexane: Ethyl acetate = 5:1) in 55% yield as white solid.

$^1\text{H NMR}$  (600 MHz;  $\text{CDCl}_3$ ):  $\delta$  8.07 (d,  $J = 8.0$  Hz, 2H), 7.86 (d,  $J = 20.4$  Hz, 2H), 7.62 (d,  $J = 3.5$  Hz, 2H), 7.44 (s, 3H), 7.35 (d,  $J = 7.9$  Hz, 2H), 7.06 (s, 1H), 5.06 (s, 2H), 2.42 (s, 3H).

$^{13}\text{C NMR}$  (151 MHz;  $\text{CDCl}_3$ ):  $\delta$  166.0, 154.5, 149.4, 145.3, 137.4, 135.4, 134.9, 131.9, 129.8, 129.4, 128.6, 128.2, 127.0, 122.0, 111.4, 108.1, 106.6, 98.6, 82.1, 49.4, 21.7

**HRMS**  $m/z$  (ESI) calcd. for  $\text{C}_{25}\text{H}_{18}\text{NO}_4\text{S}^+$  ( $\text{M}+\text{H}$ ) $^+$  428.0952, found 428.0934

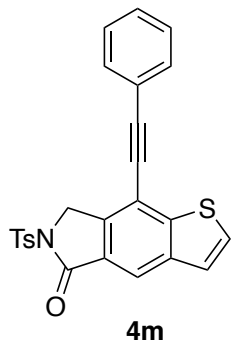

**8-(phenylethynyl)-6-tosyl-6,7-dihydro-5H-thieno[2,3-f]isoindol-5-one**

**4m** was prepared following the General Procedure 2.7 and purified by column chromatography (Hexane: Ethyl acetate = 5:1) in 72% yield as white solid.

<sup>1</sup>H NMR (600 MHz; CDCl<sub>3</sub>): δ 8.25 (s, 1H), 8.07 (d, *J* = 8.0 Hz, 2H), 7.76 (d, *J* = 5.3 Hz, 1H), 7.70 (d, *J* = 5.2 Hz, 1H), 7.64 (d, *J* = 2.6 Hz, 2H), 7.44 (s, 3H), 7.35 (d, *J* = 7.8 Hz, 2H), 5.09 (s, 2H), 2.42 (s, 3H).

<sup>13</sup>C NMR (151 MHz; CDCl<sub>3</sub>): δ 165.7, 145.3, 144.5, 140.2, 138.4, 135.4, 132.4, 131.9, 129.8, 129.4, 128.6, 128.2, 126.7, 123.2, 122.1, 119.5, 113.7, 99.1, 82.7, 49.5, 21.7

HRMS *m/z* (ESI) calcd. for C<sub>25</sub>H<sub>18</sub>NO<sub>3</sub>S<sub>2</sub><sup>+</sup> (M+H)<sup>+</sup> 444.0723, found 444.0708

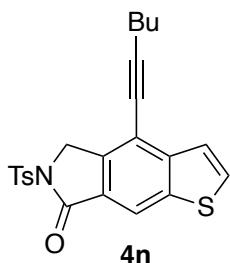

**4-(hex-1-yn-1-yl)-6-tosyl-5,6-dihydro-7H-thieno[2,3-f]isoindol-7-one**

**4n** was prepared following the General Procedure 2.7 and purified by column chromatography (Hexane: Ethyl acetate = 5:1) in 81% yield as white solid.

<sup>1</sup>H NMR (600 MHz; CDCl<sub>3</sub>): δ 8.19 (s, 1H), 8.05 (d, *J* = 8.2 Hz, 2H), 7.70 (d, *J* = 5.5 Hz, 1H), 7.58 (d, *J* = 5.5 Hz, 1H), 7.34 (d, *J* = 8.1 Hz, 2H), 4.98 (s, 2H), 2.59 (t, *J* = 7.1 Hz, 2H), 2.42 (s, 3H), 1.70 (quintet, *J* = 7.3 Hz, 2H), 1.57 (dt, *J* = 14.9, 7.4 Hz, 2H), 1.02 (t, *J* = 7.4 Hz, 3H).

<sup>13</sup>C NMR (151 MHz; CDCl<sub>3</sub>): δ 165.8, 145.2, 144.8, 140.0, 138.3, 135.5, 131.8, 129.8, 128.2, 126.5, 123.2, 118.7, 114.6, 101.0, 74.4, 49.6, 30.8, 22.1, 21.7, 19.5, 13.6

HRMS *m/z* (ESI) calcd. for C<sub>23</sub>H<sub>22</sub>NO<sub>3</sub>S<sub>2</sub><sup>+</sup> (M+H)<sup>+</sup> 424.1036, found 424.1036

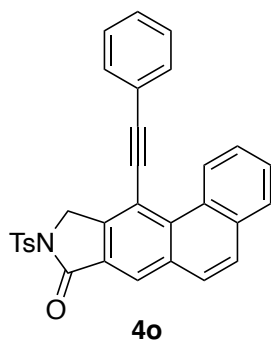

**11-(phenylethynyl)-9-tosyl-9,10-dihydro-8H-naphtho[1,2-f]isoindol-8-one**

**4o** was prepared following the General Procedure 2.7 and purified by column chromatography (Hexane: Ethyl acetate = 5:1) in 75% yield as white solid.

<sup>1</sup>H NMR (600 MHz; CDCl<sub>3</sub>): δ 10.36 (d, *J* = 4.9 Hz, 1H), 8.26 (s, 1H), 8.11 (d, *J* = 8.0 Hz, 2H), 7.93-7.93 (m, 1H), 7.80-7.71 (m, 5H), 7.50 (s, 3H), 7.36 (d, *J* = 8.0 Hz, 2H), 5.13 (s, 2H), 2.42 (s, 3H).

<sup>13</sup>C NMR (151 MHz; CDCl<sub>3</sub>): δ 165.8, 145.3, 142.5, 135.5, 133.9, 133.3, 133.1, 131.6, 130.2, 129.8, 129.5, 128.93, 128.82, 128.73, 128.5, 128.2, 127.8, 127.4, 126.62, 126.56, 125.7, 122.5, 115.0, 102.3, 86.6, 50.7, 21.7

HRMS *m/z* (ESI) calcd. for C<sub>31</sub>H<sub>22</sub>NO<sub>3</sub>S<sup>+</sup> (M+H)<sup>+</sup> 488.1315, found 488.1313

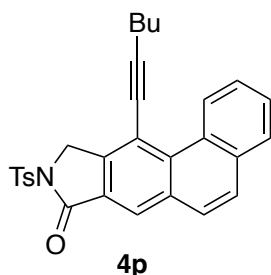**11-(hex-1-yn-1-yl)-9-tosyl-9,10-dihydro-8H-naphtho[1,2-f]isoindol-8-one**

**4p** was prepared following the General Procedure 2.7 and purified by column chromatography (Hexane: Ethyl acetate = 5:1) in 77% yield as white solid.

<sup>1</sup>H NMR (600 MHz; CDCl<sub>3</sub>): δ 10.33 (d, *J* = 8.4 Hz, 1H), 8.15 (s, 1H), 8.09 (d, *J* = 8.4 Hz, 2H), 7.88 (d, *J* = 7.0 Hz, 1H), 7.73-7.63 (m, 4H), 7.36 (d, *J* = 8.3 Hz, 2H), 4.98 (s, 2H), 2.73 (t, *J* = 7.1 Hz, 2H), 2.41 (s, 3H), 1.81 (quintet, *J* = 7.4 Hz, 2H), 1.65 (q, *J* = 7.5 Hz, 2H), 1.07 (t, *J* = 7.4 Hz, 3H).

<sup>13</sup>C NMR (151 MHz; CDCl<sub>3</sub>): δ 165.9, 145.3, 142.5, 135.5, 133.6, 133.22, 133.06, 130.3, 129.8, 128.65, 128.57, 128.28, 128.20, 127.8, 127.2, 126.5, 126.2, 124.9, 115.8, 104.7, 78.2, 50.8, 30.6, 22.3, 21.7, 20.0, 13.7

HRMS *m/z* (ESI) calcd. for C<sub>29</sub>H<sub>26</sub>NO<sub>3</sub>S<sup>+</sup> (M+H)<sup>+</sup> 468.1628, found 468.1629

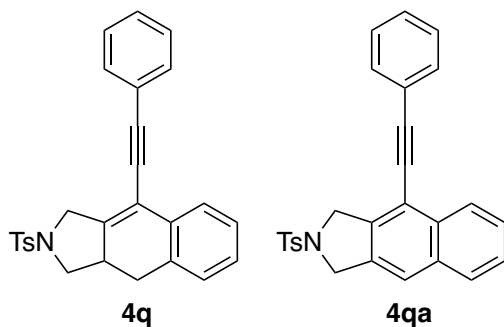**4q: 9-(phenylethynyl)-2-tosyl-2,3,3a,4-tetrahydro-1H-benzo[f]isoindole****4qa: 4-(phenylethynyl)-2-tosyl-2,3-dihydro-1H-benzo[f]isoindole**

**4q:4qa=1:1.2** was prepared following the General Procedure 2.7 and purified by column chromatography (Hexane: Ethyl acetate = 10:1) in 40% yield as white solid.

<sup>1</sup>H NMR (600 MHz; CDCl<sub>3</sub>): δ 8.34 (d, *J* = 8.3 Hz, 1H), 7.84-7.82 (m, 2H), 7.79-7.77 (m, 2H), 7.65-7.63 (m, 2H), 7.60-7.48 (m, 5H), 7.45-7.41 (m, 3H), 7.39-7.32 (m, 5H), 7.25 (t, *J* = 5.5 Hz, 1H), 7.17 (td, *J* = 7.4, 1.1 Hz, 0.7H), 7.10 (d, *J* = 7.4 Hz, 0.7H), 4.90 (s, 2H), 4.79 (d, *J* = 0.7 Hz,

2H), 4.47 (dd,  $J = 16.9, 2.4$  Hz, 0.7H), 4.12 (dd,  $J = 16.9, 3.3$  Hz, 0.7H), 4.03 (dd,  $J = 9.2, 8.0$  Hz, 0.7H), 3.12-3.08 (m, 0.7H), 2.87 (ddd,  $J = 10.9, 9.0, 8.2$  Hz, 1.4H), 2.54 (t,  $J = 15.2$  Hz, 0.7H), 2.43 (s, 2H), 2.39 (s, 3H).

$^{13}\text{C NMR}$  (151 MHz;  $\text{CDCl}_3$ ):  $\delta$  146.5, 143.8, 138.4, 134.2, 133.5, 133.00, 132.92, 132.89, 132.73, 132.65, 131.76, 131.64, 129.91, 129.89, 128.9, 128.67, 128.54, 128.46, 128.2, 127.79, 127.76, 127.74, 127.67, 127.2, 126.9, 126.6, 125.8, 125.0, 122.80, 122.75, 121.6, 115.2, 114.2, 99.2, 96.3, 84.2, 83.7, 54.8, 53.76, 53.74, 51.6, 39.1, 31.7, 21.58, 21.52

**HRMS**  $m/z$  (ESI) calcd. for **4q**:  $\text{C}_{27}\text{H}_{24}\text{NO}_2\text{S}^+$  ( $\text{M}+\text{H}$ ) $^+$  426.1523, found 426.1512; **4qa**:  $\text{C}_{27}\text{H}_{22}\text{NO}_2\text{S}^+$  ( $\text{M}+\text{H}$ ) $^+$  424.1366, found 424.1371

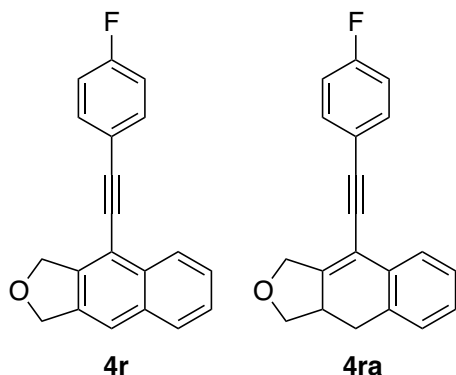

**4r**: 4-((4-fluorophenyl)ethynyl)-1,3-dihydroindolo[2,3-c]naphthalene

**4ra**: 9-((4-fluorophenyl)ethynyl)-1,3,3a,4-tetrahydroindolo[2,3-c]naphthalene

**4r**:**4ra**=7:1 was prepared following the General Procedure 2.7 and purified by column chromatography (Hexane: Ethyl acetate = 10:1) in 32% yield as white solid.

$^1\text{H NMR}$  (600 MHz;  $\text{CDCl}_3$ ):  $\delta$  8.36 (d,  $J = 8.3$  Hz, 1H), 7.84 (d,  $J = 8.1$  Hz, 1H), 7.66 (s, 1H), 7.62-7.59 (m, 2H), 7.57 (ddd,  $J = 8.2, 6.9, 1.3$  Hz, 1H), 7.51 (td,  $J = 7.5, 1.2$  Hz, 1H), 7.11-7.09 (m, 2H), 5.37 (s, 2H), 5.28 (d,  $J = 1.0$  Hz, 2H), 4.82 (dd,  $J = 16.1, 2.1$  Hz, ), 4.72 (d,  $J = 3.2$  Hz, ).

$^{13}\text{C NMR}$  (151 MHz;  $\text{CDCl}_3$ ):  $\delta$  162.82 ( $J = 250.6$  Hz), 141.9, 137.6, 133.62, 133.56, 133.2, 132.8, 128.4, 126.6, 126.3, 125.7, 119.9, 119.16 ( $J = 3.3$  Hz), 115.90, 115.76, 113.1, 97.2, 84.4, 73.53, 73.47

$^{19}\text{F NMR}$  (564 MHz;  $\text{CDCl}_3$ ):  $\delta$  -110.2, -110.7

**HRMS**  $m/z$  (ESI) calcd. for **4r**:  $\text{C}_{20}\text{H}_{14}\text{FO}^+$  ( $\text{M}+\text{H}$ ) $^+$  289.1024, found 289.1017; **4ra**:  $\text{C}_{20}\text{H}_{16}\text{FO}^+$  ( $\text{M}+\text{H}$ ) $^+$  291.1180, found 291.1183

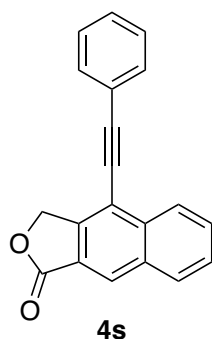

**4-(phenylethynyl)naphtho[2,3-c]furan-1(3H)-one**

**4s** was prepared following the General Procedure 2.7 and purified by column chromatography (Hexane: Ethyl acetate = 5:1) in 75% yield as white solid.

**<sup>1</sup>H NMR** (600 MHz; CDCl<sub>3</sub>): δ 8.51 (d, *J* = 8.5 Hz, 1H), 8.48 (s, 1H), 8.09 (d, *J* = 8.2 Hz, 1H), 7.78 (ddd, *J* = 8.3, 6.9, 1.3 Hz, 1H), 7.68-7.65 (m, 3H), 7.44 (dt, *J* = 4.5, 1.7 Hz, 3H), 5.60 (s, 2H).  
**<sup>13</sup>C NMR** (151 MHz; CDCl<sub>3</sub>): δ 170.7, 143.2, 135.8, 133.2, 131.8, 130.5, 129.8, 129.3, 128.6, 127.4, 127.1, 126.1, 123.3, 122.3, 115.3, 100.6, 82.6, 69.8  
**HRMS** *m/z* (ESI) calcd. for C<sub>20</sub>H<sub>13</sub>O<sub>2</sub><sup>+</sup> (M+H)<sup>+</sup> 285.0911, found 285.0903

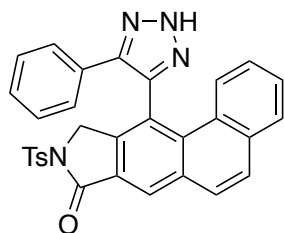

**5aa**

**11-(5-phenyl-2H-1,2,3-triazol-4-yl)-9-tosyl-9,10-dihydro-8H-naphtho[1,2-f]isoindol-8-one**  
**5aa** was prepared following the General Procedure 2.8 and purified by column chromatography (DCM: MeOH = 20:1) in 92% yield as white solid.

**<sup>1</sup>H NMR** (500 MHz; CDCl<sub>3</sub>:CD<sub>3</sub>OD (10:1)): δ 8.43 (s, 1H), 7.90-7.73 (m, 6H), 7.53 (t, *J* = 7.4 Hz, 1H), 7.34-7.11 (m, 8H), 4.68 (d, *J* = 16.2 Hz, 1H), 4.37 (d, *J* = 16.4 Hz, 1H), 2.39 (s, 3H).  
**<sup>13</sup>C NMR** δ (126 MHz; CDCl<sub>3</sub>:CD<sub>3</sub>OD (10:1)): δ 165.9, 145.4, 139.2, 134.9, 134.3, 133.95, 133.88, 129.7, 129.05, 128.93, 128.87, 128.80, 128.78, 128.69, 128.62, 128.0, 127.64, 127.50, 127.1, 126.70, 126.65, 126.3, 40.4, 21.6  
**HRMS** *m/z* (ESI) calcd. for C<sub>31</sub>H<sub>23</sub>N<sub>4</sub>O<sub>3</sub>S<sup>+</sup> (M+H)<sup>+</sup> 531.1486, found 531.1508

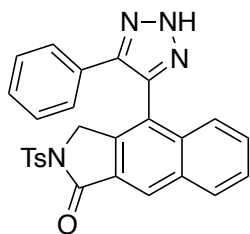

**5ab**

**4-(5-phenyl-2H-1,2,3-triazol-4-yl)-2-tosyl-2,3-dihydro-1H-benzo[f]isoindol-1-one**  
**5ab** was prepared following the General Procedure 2.8 and purified by column chromatography (DCM: MeOH = 20:1) in 90% yield as white solid. **5ab** have poor solubility in CDCl<sub>3</sub> and *d*<sub>6</sub>-DMSO.

**<sup>1</sup>H NMR** (500 MHz; CDCl<sub>3</sub>:CD<sub>3</sub>OD (10:1)): δ 8.47 (s, 1H), 8.05 (d, *J* = 8.0 Hz, 1H), 7.90 (d, *J* = 7.8 Hz, 2H), 7.69 (d, *J* = 8.2 Hz, 1H), 7.54 (dd, *J* = 19.6, 7.5 Hz, 2H), 7.31-7.19 (m, 7H), 4.69 (s, 2H), 2.41 (s, 3H).  
**<sup>13</sup>C NMR** (126 MHz; CDCl<sub>3</sub>:CD<sub>3</sub>OD): δ 166.0, 145.3, 135.5, 135.02, 134.92, 133.3, 130.2, 129.7, 129.5, 128.91, 128.72, 128.69, 128.0, 127.48, 127.30, 127.12, 126.5, 125.5, 21.6  
**HRMS** *m/z* (ESI) calcd. for C<sub>27</sub>H<sub>21</sub>N<sub>4</sub>O<sub>3</sub>S<sup>+</sup> (M+H)<sup>+</sup> 481.1329, found 481.1331



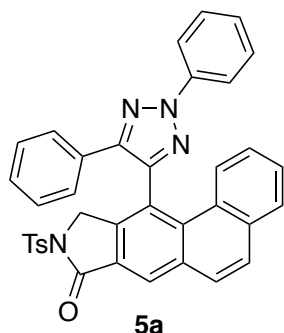

**4-(2,5-diphenyl-2H-1,2,3-triazol-4-yl)-2-tosyl-2,3-dihydro-1H-benzo[f]isoindol-1-one**

**5a** was prepared following the General Procedure 2.9 and purified by column chromatography (Hexane: Ethyl acetate = 3:1) in 92% yield as white solid.

<sup>1</sup>H NMR (600 MHz; CDCl<sub>3</sub>): δ 8.48 (s, 1H), 8.24-8.23 (m, 2H), 7.94 (dd, *J* = 16.0, 8.6 Hz, 3H), 7.89-7.82 (m, 3H), 7.58-7.51 (m, 3H), 7.46-7.42 (m, 3H), 7.29-7.25 (m, 3H), 7.21 (t, *J* = 7.4 Hz, 1H), 7.13 (t, *J* = 7.7 Hz, 2H), 4.79 (d, *J* = 16.3 Hz, 1H), 4.49 (d, *J* = 16.4 Hz, 1H), 2.39 (s, 3H).

<sup>13</sup>C NMR (151 MHz; CDCl<sub>3</sub>): δ 165.6, 146.0, 145.3, 143.7, 139.6, 139.3, 135.2, 134.3, 134.1, 133.8, 129.81, 129.75, 129.5, 129.27, 129.19, 129.04, 128.89, 128.18, 128.10, 128.08, 127.82, 127.76, 127.3, 126.8, 126.6, 126.3, 124.2, 119.0, 49.9, 21.7

HRMS *m/z* (ESI) calcd. for C<sub>37</sub>H<sub>27</sub>N<sub>4</sub>O<sub>3</sub>S<sup>+</sup> (M+H)<sup>+</sup> 607.1799, found 607.1817

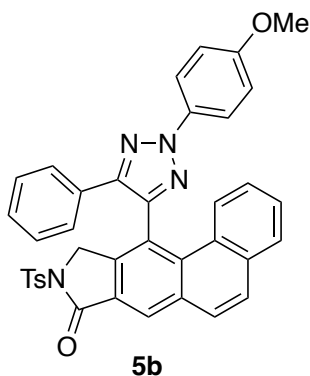

**11-(2-(4-methoxyphenyl)-5-phenyl-2H-1,2,3-triazol-4-yl)-9-tosyl-9,10-dihydro-8H-naphtho[1,2-f]isoindol-8-one**

**5b** was prepared following the General Procedure 2.9 and purified by column chromatography (Hexane: Ethyl acetate = 3:1) in 83% yield as white solid.

<sup>1</sup>H NMR (600 MHz; CDCl<sub>3</sub>): δ 8.48 (s, 1H), 8.14 (d, *J* = 9.0 Hz, 2H), 7.96 (d, *J* = 8.7 Hz, 1H), 7.92 (d, *J* = 8.3 Hz, 2H), 7.89-7.82 (m, 3H), 7.52 (t, *J* = 7.4 Hz, 1H), 7.43 (d, *J* = 7.6 Hz, 2H), 7.29-7.24 (m, 3H), 7.21 (t, *J* = 7.3 Hz, 1H), 7.13 (t, *J* = 7.6 Hz, 2H), 7.06 (d, *J* = 9.0 Hz, 2H), 4.78 (d, *J* = 16.3 Hz, 1H), 4.48 (d, *J* = 16.4 Hz, 1H), 3.90 (s, 3H), 2.39 (s, 3H).

<sup>13</sup>C NMR (151 MHz; CDCl<sub>3</sub>): δ 165.7, 159.5, 145.5, 145.3, 143.1, 139.3, 135.2, 134.4, 134.1, 133.9, 133.4, 129.85, 129.74, 129.4, 129.16, 129.02, 128.88, 128.17, 128.07, 127.79, 127.77, 127.2, 126.80, 126.63, 126.3, 124.4, 120.4, 114.5, 55.7, 50.0, 21.7

HRMS *m/z* (ESI) calcd. for C<sub>38</sub>H<sub>29</sub>N<sub>4</sub>O<sub>4</sub>S<sup>+</sup> (M+H)<sup>+</sup> 637.1905, found 637.1917

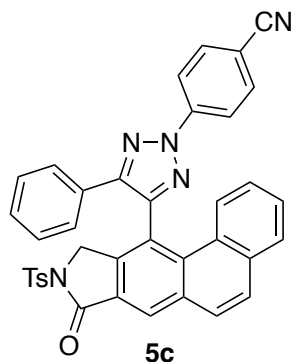

**4-(4-(8-oxo-9-tosyl-9,10-dihydro-8H-naphtho[1,2-f]isoindol-11-yl)-5-phenyl-2H-1,2,3-triazol-2-yl)benzonitrile**

**5c** was prepared following the General Procedure 2.9 and purified by column chromatography (Hexane: Ethyl acetate = 3:1) in 77% yield as white solid.

<sup>1</sup>H NMR (600 MHz; CDCl<sub>3</sub>): δ 8.51 (s, 1H), 8.36 (d, *J* = 8.8 Hz, 2H), 7.93 (d, *J* = 8.4 Hz, 2H), 7.90-7.84 (m, 6H), 7.53 (t, *J* = 7.4 Hz, 1H), 7.41-7.39 (m, 2H), 7.30 (d, *J* = 8.2 Hz, 2H), 7.27-7.23 (m, 2H), 7.14 (t, *J* = 7.8 Hz, 2H), 4.80 (d, *J* = 16.3 Hz, 1H), 4.47 (d, *J* = 16.3 Hz, 1H), 2.40 (s, 3H).

<sup>13</sup>C NMR (151 MHz; CDCl<sub>3</sub>): δ 165.4, 147.4, 145.42, 145.30, 142.1, 139.1, 135.1, 134.4, 134.1, 133.71, 133.66, 129.77, 129.59, 129.56, 129.29, 129.18, 128.99, 128.6, 128.2, 127.91, 127.76, 127.58, 126.8, 126.44, 126.36, 123.5, 119.2, 118.2, 111.4, 49.8, 21.7

<sup>19</sup>F NMR (564 MHz; CDCl<sub>3</sub>): δ -117.2

HRMS *m/z* (ESI) calcd. for C<sub>38</sub>H<sub>26</sub>N<sub>5</sub>O<sub>3</sub>S<sup>+</sup> (M+H)<sup>+</sup> 632.1751, found 632.1752

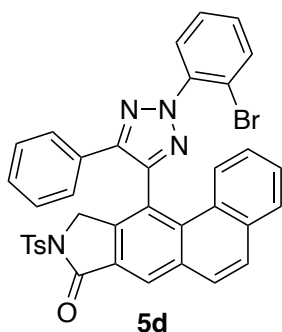

**11-(2-(2-bromophenyl)-5-phenyl-2H-1,2,3-triazol-4-yl)-9-tosyl-9,10-dihydro-8H-naphtho[1,2-f]isoindol-8-one**

**5d** was prepared following the General Procedure 2.9 and purified by column chromatography (Hexane: Ethyl acetate = 3:1) in 45% yield as white solid.

<sup>1</sup>H NMR (600 MHz; CDCl<sub>3</sub>): δ 8.47 (s, 1H), 8.01 (d, *J* = 8.6 Hz, 1H), 7.93 (d, *J* = 8.2 Hz, 2H), 7.87-7.80 (m, 5H), 7.55 (dt, *J* = 17.2, 8.2 Hz, 2H), 7.44-7.39 (m, 3H), 7.30 (t, *J* = 10.3 Hz, 3H), 7.20 (t, *J* = 7.3 Hz, 1H), 7.11 (t, *J* = 7.6 Hz, 2H), 4.88 (d, *J* = 16.3 Hz, 1H), 4.55 (d, *J* = 16.3 Hz, 1H), 2.39 (s, 3H).

<sup>13</sup>C NMR (151 MHz; CDCl<sub>3</sub>): δ 165.6, 146.2, 145.3, 143.8, 139.5, 139.3, 135.2, 134.36, 134.27, 134.03, 133.93, 131.1, 129.78, 129.73, 129.17, 129.08, 129.01, 128.90, 128.37, 128.20, 128.15, 128.12, 127.78, 127.71, 127.3, 126.90, 126.76, 126.4, 123.9, 119.0, 50.1, 21.7

HRMS *m/z* (ESI) calcd. for C<sub>37</sub>H<sub>26</sub>BrN<sub>4</sub>O<sub>3</sub>S<sup>+</sup> (M+H)<sup>+</sup> 685.0904, found 685.0899

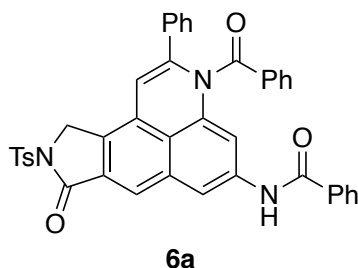

***N*-(3-benzoyl-8-oxo-2-phenyl-9-tosyl-3,8,9,10-tetrahydroisoindolo[4,5,6-*de*]quinolin-5-yl)benzamide**

**6a** was prepared following the General Procedure 2.1 and purified by column chromatography (Hexane: Ethyl acetate = 3:1) in 83% yield as red solid.

<sup>1</sup>H NMR (600 MHz; CDCl<sub>3</sub>): δ 8.30 (d, *J* = 1.6 Hz, 1H), 8.06 (d, *J* = 8.4 Hz, 2H), 8.03 (d, *J* = 1.7 Hz, 1H), 8.00 (s, 1H), 7.90 (d, *J* = 7.4 Hz, 2H), 7.85 (s, 1H), 7.57 (t, *J* = 7.3 Hz, 1H), 7.50 (t, *J* = 7.6 Hz, 2H), 7.42 (d, *J* = 7.4 Hz, 2H), 7.35 (d, *J* = 8.4 Hz, 2H), 7.31 (t, *J* = 7.4 Hz, 1H), 7.17-7.14 (m, 7H), 6.03 (s, 1H), 4.92 (s, 2H), 2.43 (s, 3H).

<sup>13</sup>C NMR (151 MHz; CDCl<sub>3</sub>): δ 172.4, 166.04, 165.89, 145.3, 144.4, 138.7, 138.0, 137.4, 136.3, 135.37, 135.29, 134.6, 132.4, 132.1, 129.80, 129.77, 128.92, 128.86, 128.81, 128.75, 128.34, 128.23, 127.10, 126.98, 126.1, 125.6, 124.2, 121.0, 112.3, 107.3, 105.6, 48.5, 21.7

**HRMS** *m/z* (ESI) calcd. for C<sub>41</sub>H<sub>32</sub>N<sub>3</sub>O<sub>5</sub>S<sup>+</sup> (M+H)<sup>+</sup> 678.2058, found 678.2083

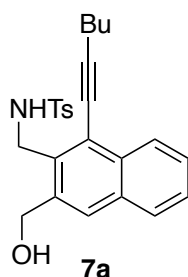

***N*-((1-(hex-1-yn-1-yl)-3-(hydroxymethyl)naphthalen-2-yl)methyl)-4-methylbenzenesulfonamide**

**7a** was prepared following the General Procedure 2.10 and purified by column chromatography (Hexane: Ethyl acetate = 3:1) in 82% yield as white solid.

<sup>1</sup>H NMR (600 MHz; CDCl<sub>3</sub>): δ 8.21 (d, *J* = 8.2 Hz, 1H), 7.74 (dt, *J* = 17.3, 8.6 Hz, 4H), 7.54-7.47 (m, 2H), 7.19 (d, *J* = 8.1 Hz, 2H), 5.42 (t, *J* = 6.5 Hz, 1H), 4.84 (s, 2H), 4.57 (d, *J* = 6.6 Hz, 2H), 2.47 (t, *J* = 7.2 Hz, 2H), 2.33 (s, 3H), 1.64-1.59 (m, 3H), 1.49 (q, *J* = 7.5 Hz, 2H), 0.98 (t, *J* = 7.4 Hz, 3H).

<sup>13</sup>C NMR (151 MHz; CDCl<sub>3</sub>): δ 143.3, 136.7, 136.3, 134.6, 133.2, 132.5, 129.7, 129.4, 128.3, 128.0, 127.13, 127.01, 126.84, 126.45, 126.42, 122.9, 101.3, 76.2, 63.9, 43.5, 30.8, 22.2, 21.4, 19.5, 13.6

**HRMS** *m/z* (ESI) calcd. for C<sub>25</sub>H<sub>26</sub>NO<sub>2</sub>S<sup>+</sup> (M-OH)<sup>+</sup> 404.1679, found 404.1675

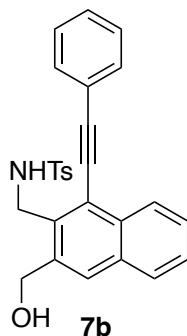

***N*-((3-(hydroxymethyl)-1-(phenylethynyl)naphthalen-2-yl)methyl)-4-methylbenzenesulfonamide**

**7b** was prepared following the General Procedure 2.10 and purified by column chromatography (Hexane: Ethyl acetate = 3:1) in 92% yield as white solid.

<sup>1</sup>H NMR (600 MHz; CDCl<sub>3</sub>): δ 8.33 (d, *J* = 8.3 Hz, 1H), 7.82 (d, *J* = 5.2 Hz, 2H), 7.73 (d, *J* = 8.1 Hz, 2H), 7.57 (dt, *J* = 31.8, 7.4 Hz, 2H), 7.42 (ddd, *J* = 26.8, 14.0, 6.3 Hz, 5H), 7.11 (d, *J* = 8.0 Hz, 2H), 5.34 (s, 2H), 5.02 (t, *J* = 6.2 Hz, 1H), 4.66 (d, *J* = 6.4 Hz, 2H), 2.30 (s, 3H).

<sup>13</sup>C NMR (151 MHz; CDCl<sub>3</sub>): δ 170.6, 143.4, 136.5, 134.9, 133.1, 132.5, 132.3, 131.7, 130.5, 129.6, 129.0, 128.5, 128.3, 127.7, 127.27, 127.11, 126.3, 122.5, 122.2, 99.7, 84.7, 64.4, 43.5, 21.5, 21.1

HRMS *m/z* (ESI) calcd. for C<sub>27</sub>H<sub>22</sub>NO<sub>2</sub>S<sup>+</sup> (M-OH)<sup>+</sup> 424.1366, found 424.1371

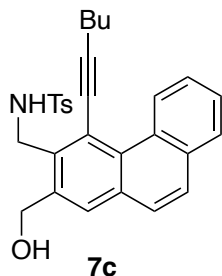

***N*-((4-(hex-1-yn-1-yl)-2-(hydroxymethyl)phenanthren-3-yl)methyl)-4-methylbenzenesulfonamide**

**7c** was prepared following the General Procedure 2.10 and purified by column chromatography (Hexane: Ethyl acetate = 3:1) in 83% yield as white solid.

<sup>1</sup>H NMR (600 MHz; CDCl<sub>3</sub>): δ 10.18 (d, *J* = 8.4 Hz, 1H), 7.85 (dd, *J* = 7.7, 1.2 Hz, 1H), 7.73 (s, 1H), 7.69 (d, *J* = 8.3 Hz, 3H), 7.62-7.56 (m, 3H), 7.11 (d, *J* = 7.9 Hz, 2H), 5.49 (t, *J* = 6.7 Hz, 1H), 4.87 (s, 2H), 4.63 (d, *J* = 6.7 Hz, 2H), 2.59 (d, *J* = 1.4 Hz, 1H), 2.48 (t, *J* = 7.2 Hz, 2H), 2.19 (s, 3H), 1.66-1.63 (m, 2H), 1.54-1.50 (m, 2H), 0.99 (t, *J* = 7.4 Hz, 3H).

<sup>13</sup>C NMR (151 MHz; CDCl<sub>3</sub>): δ 143.3, 137.04, 137.00, 136.83, 133.2, 132.6, 130.3, 129.8, 129.4, 129.2, 128.4, 126.95, 126.90, 126.2, 125.6, 120.8, 102.6, 80.7, 63.5, 53.4, 43.4, 30.3, 22.3, 21.3, 19.8, 13.7

HRMS *m/z* (ESI) calcd. for C<sub>29</sub>H<sub>28</sub>NO<sub>2</sub>S<sup>+</sup> (M-OH)<sup>+</sup> 454.1836, found 454.1830

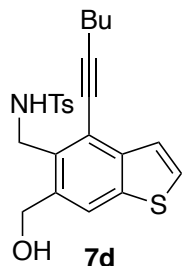

***N*-((4-(hex-1-yn-1-yl)-6-(hydroxymethyl)benzo[*b*]thiophen-5-yl)methyl)-4-methylbenzenesulfonamide**

**7d** was prepared following the General Procedure 2.10 and purified by column chromatography (Hexane: Ethyl acetate = 3:1) in 85% yield as white solid.

<sup>1</sup>H NMR (600 MHz; CDCl<sub>3</sub>): δ 7.74 (s, 1H), 7.71 (d, *J* = 8.2 Hz, 2H), 7.45 (d, *J* = 5.4 Hz, 1H), 7.42-7.41 (m, 1H), 7.19 (d, *J* = 8.0 Hz, 2H), 4.78 (s, 2H), 4.49 (s, 2H), 2.43 (t, *J* = 7.1 Hz, 2H), 2.35 (s, 3H), 1.61-1.56 (m, 2H), 1.51-1.46 (m, 2H), 0.97 (t, *J* = 7.3 Hz, 3H).

<sup>13</sup>C NMR (151 MHz; CDCl<sub>3</sub>): δ 143.2, 141.0, 139.1, 136.7, 135.4, 132.5, 129.7, 129.4, 127.6, 127.1, 126.4, 123.8, 122.6, 119.9, 99.4, 76.6, 63.8, 43.0, 30.8, 22.2, 21.4, 19.4, 13.6

**HRMS** *m/z* (ESI) calcd. for C<sub>23</sub>H<sub>24</sub>NO<sub>2</sub>S<sub>2</sub><sup>+</sup> (M-OH)<sup>+</sup> 410.1243, found 410.1245

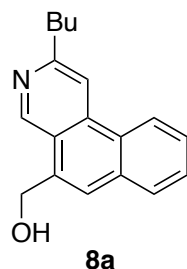

**(2-butylbenzo[*f*]isoquinolin-5-yl)methanol**

**8a** was prepared following the General Procedure 2.11 and purified by column chromatography (Hexane: Ethyl acetate = 2:1) in 63% yield as white solid.

<sup>1</sup>H NMR (600 MHz; CDCl<sub>3</sub>): δ 9.46 (s, 1H), 8.66-8.64 (m, 1H), 8.28 (s, 1H), 7.91-7.89 (m, 1H), 7.80 (s, 1H), 7.71-7.68 (m, 2H), 5.26 (d, *J* = 0.6 Hz, 2H), 3.04 (t, *J* = 7.8 Hz, 2H), 2.61 (s, 3H), 1.87-1.84 (m, 2H), 1.46 (dt, *J* = 14.9, 7.4 Hz, 2H), 0.99 (t, *J* = 7.4 Hz, 3H).

<sup>13</sup>C NMR (151 MHz; CDCl<sub>3</sub>): δ 158.1, 147.6, 136.1, 134.0, 133.2, 128.80, 128.76, 128.5, 127.0, 125.9, 123.17, 123.05, 114.6, 63.0, 41.0, 38.3, 32.4, 22.6, 14.0

**HRMS** *m/z* (ESI) calcd. for C<sub>18</sub>H<sub>20</sub>NO<sup>+</sup> (M+H)<sup>+</sup> 266.1540, found 266.1545

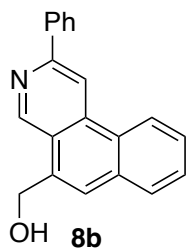

**(2-phenylbenzo[*f*]isoquinolin-5-yl)methanol**

**8b** was prepared following the General Procedure 2.11 and purified by column chromatography (Hexane: Ethyl acetate = 2:1) in 72% yield as white solid.

**<sup>1</sup>H NMR** (600 MHz; CDCl<sub>3</sub>): δ 9.58 (s, 1H), 8.79 (s, 1H), 8.70 (dd, *J* = 5.8, 3.4 Hz, 1H), 8.17 (d, *J* = 7.7 Hz, 2H), 7.89 (dd, *J* = 5.9, 3.2 Hz, 1H), 7.79 (s, 1H), 7.71 (dq, *J* = 6.1, 3.1 Hz, 2H), 7.55 (t, *J* = 7.5 Hz, 2H), 7.48-7.45 (m, 1H), 5.27 (s, 2H).

**<sup>13</sup>C NMR** (151 MHz; CDCl<sub>3</sub>): δ 153.2, 148.1, 139.7, 136.2, 133.9, 133.3, 128.93, 128.91, 128.88, 128.81, 128.75, 127.24, 127.17, 126.6, 124.0, 123.0, 112.7, 63.0

**HRMS** *m/z* (ESI) calcd. for C<sub>20</sub>H<sub>16</sub>NO<sup>+</sup> (M+H)<sup>+</sup> 286.1227, found 286.1286

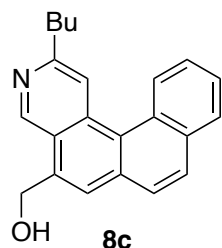

**(2-butyl-naphtho[1,2-f]isoquinolin-5-yl)methanol**

**8c** was prepared following the General Procedure 2.11 and purified by column chromatography (Hexane: Ethyl acetate = 2:1) in 25% yield as white solid.

**<sup>1</sup>H NMR** (600 MHz; CDCl<sub>3</sub>): δ 9.55 (s, 1H), 8.91 (d, *J* = 8.4 Hz, 1H), 8.64 (s, 1H), 8.00 (d, *J* = 7.8 Hz, 1H), 7.92 (d, *J* = 8.5 Hz, 1H), 7.83 (s, 1H), 7.74 (d, *J* = 8.5 Hz, 1H), 7.69-7.67 (m, 1H), 7.63 (t, *J* = 7.3 Hz, 1H), 5.27 (s, 2H), 3.01 (t, *J* = 7.7 Hz, 2H), 1.82 (dt, *J* = 15.2, 7.6 Hz, 2H), 1.44 (dt, *J* = 14.9, 7.4 Hz, 2H), 0.97 (t, *J* = 7.4 Hz, 3H).

**<sup>13</sup>C NMR** (151 MHz; CDCl<sub>3</sub>): δ 156.9, 147.9, 135.33, 135.25, 133.4, 132.9, 130.1, 129.6, 128.9, 127.0, 126.82, 126.67, 126.18, 125.2, 124.1, 119.0, 62.3, 38.1, 32.3, 22.5, 14.0

**HRMS** *m/z* (ESI) calcd. for C<sub>22</sub>H<sub>22</sub>NO<sup>+</sup> (M+H)<sup>+</sup> 316.1696, found 316.1749

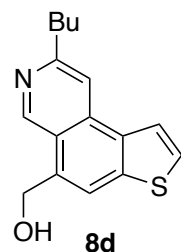

**(8-butylthieno[3,2-f]isoquinolin-5-yl)methanol**

**8d** was prepared following the General Procedure 2.11 and purified by column chromatography (Hexane: Ethyl acetate = 2:1) in 55% yield as white solid.

**<sup>1</sup>H NMR** (600 MHz; CDCl<sub>3</sub>): δ 9.49 (s, 1H), 7.96 (s, 1H), 7.93 (d, *J* = 5.3 Hz, 1H), 7.89 (s, 1H), 7.61 (d, *J* = 5.3 Hz, 1H), 5.25 (s, 2H), 2.99 (t, *J* = 7.8 Hz, 2H), 1.82 (q, *J* = 7.7 Hz, 2H), 1.44 (q, *J* = 7.5 Hz, 2H), 0.97 (t, *J* = 7.4 Hz, 3H).

**<sup>13</sup>C NMR** (151 MHz; CDCl<sub>3</sub>): δ 157.1, 148.3, 140.7, 134.0, 133.60, 133.54, 126.6, 122.2, 121.9, 120.0, 115.2, 62.7, 38.0, 32.3, 22.6, 14.0

**HRMS** *m/z* (ESI) calcd. for C<sub>16</sub>H<sub>18</sub>NOS<sup>+</sup> (M+H)<sup>+</sup> 272.1104, found 272.1186

## VII. NMR Spectra Data





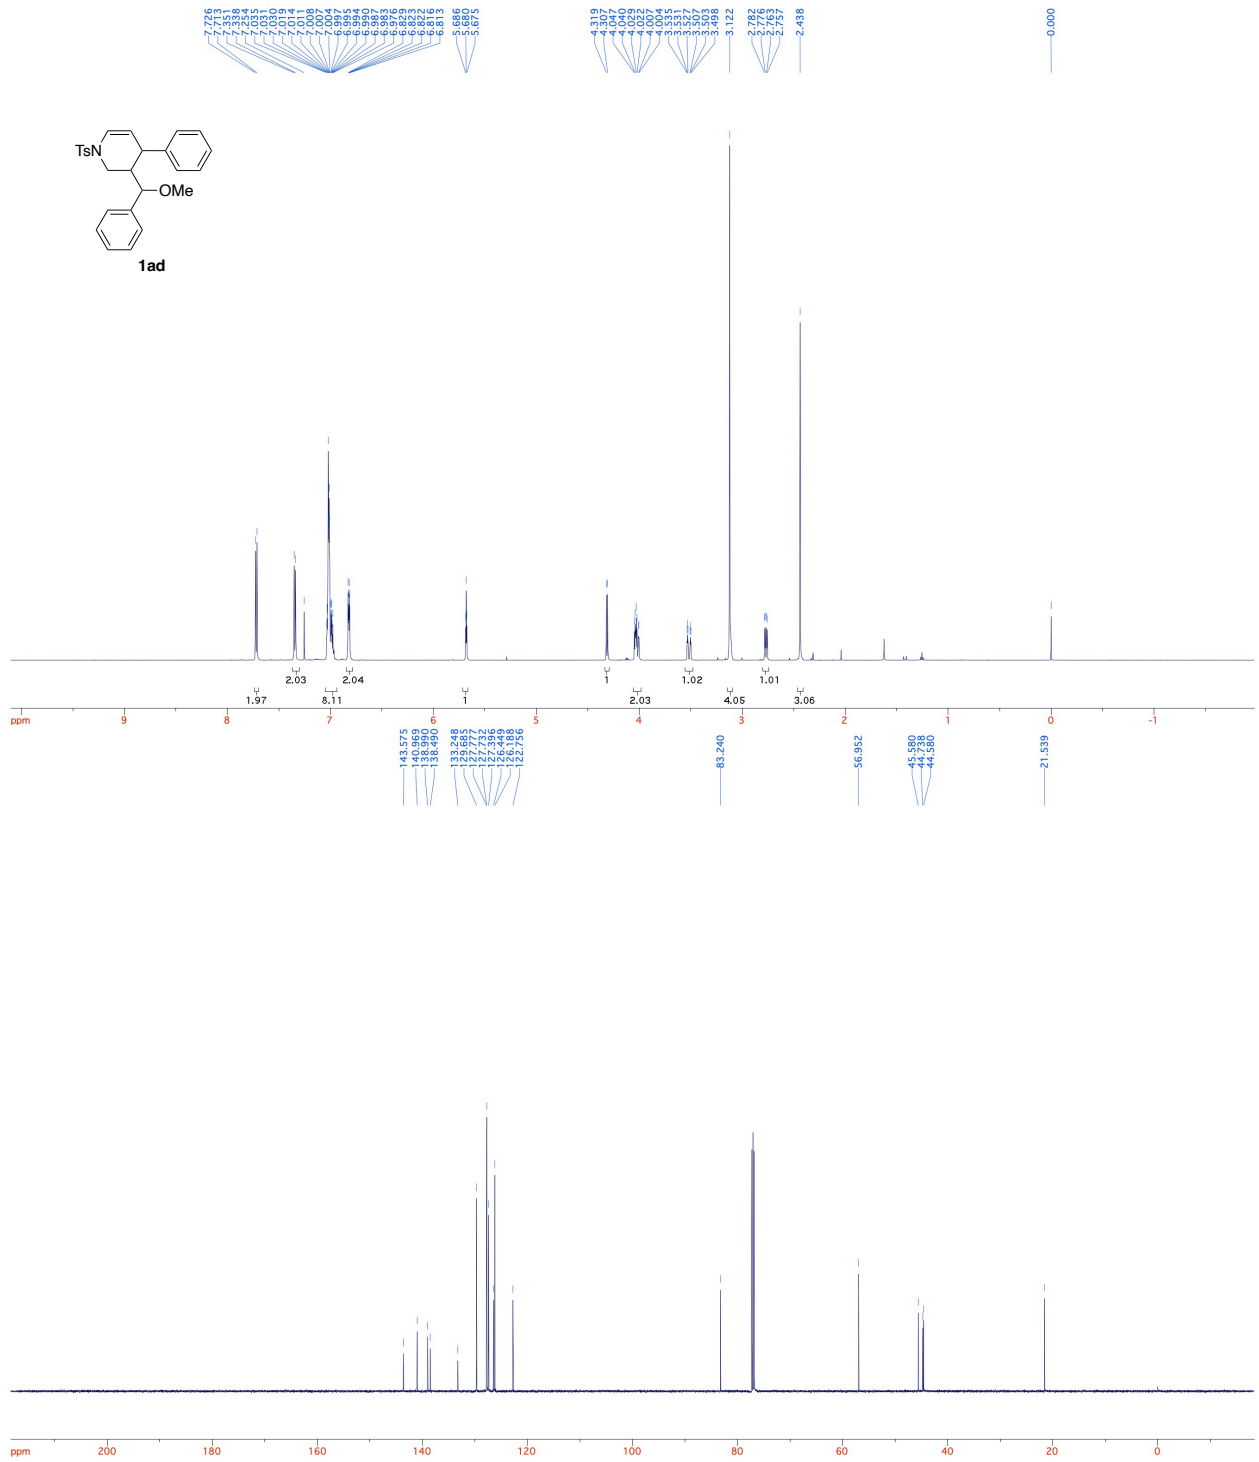



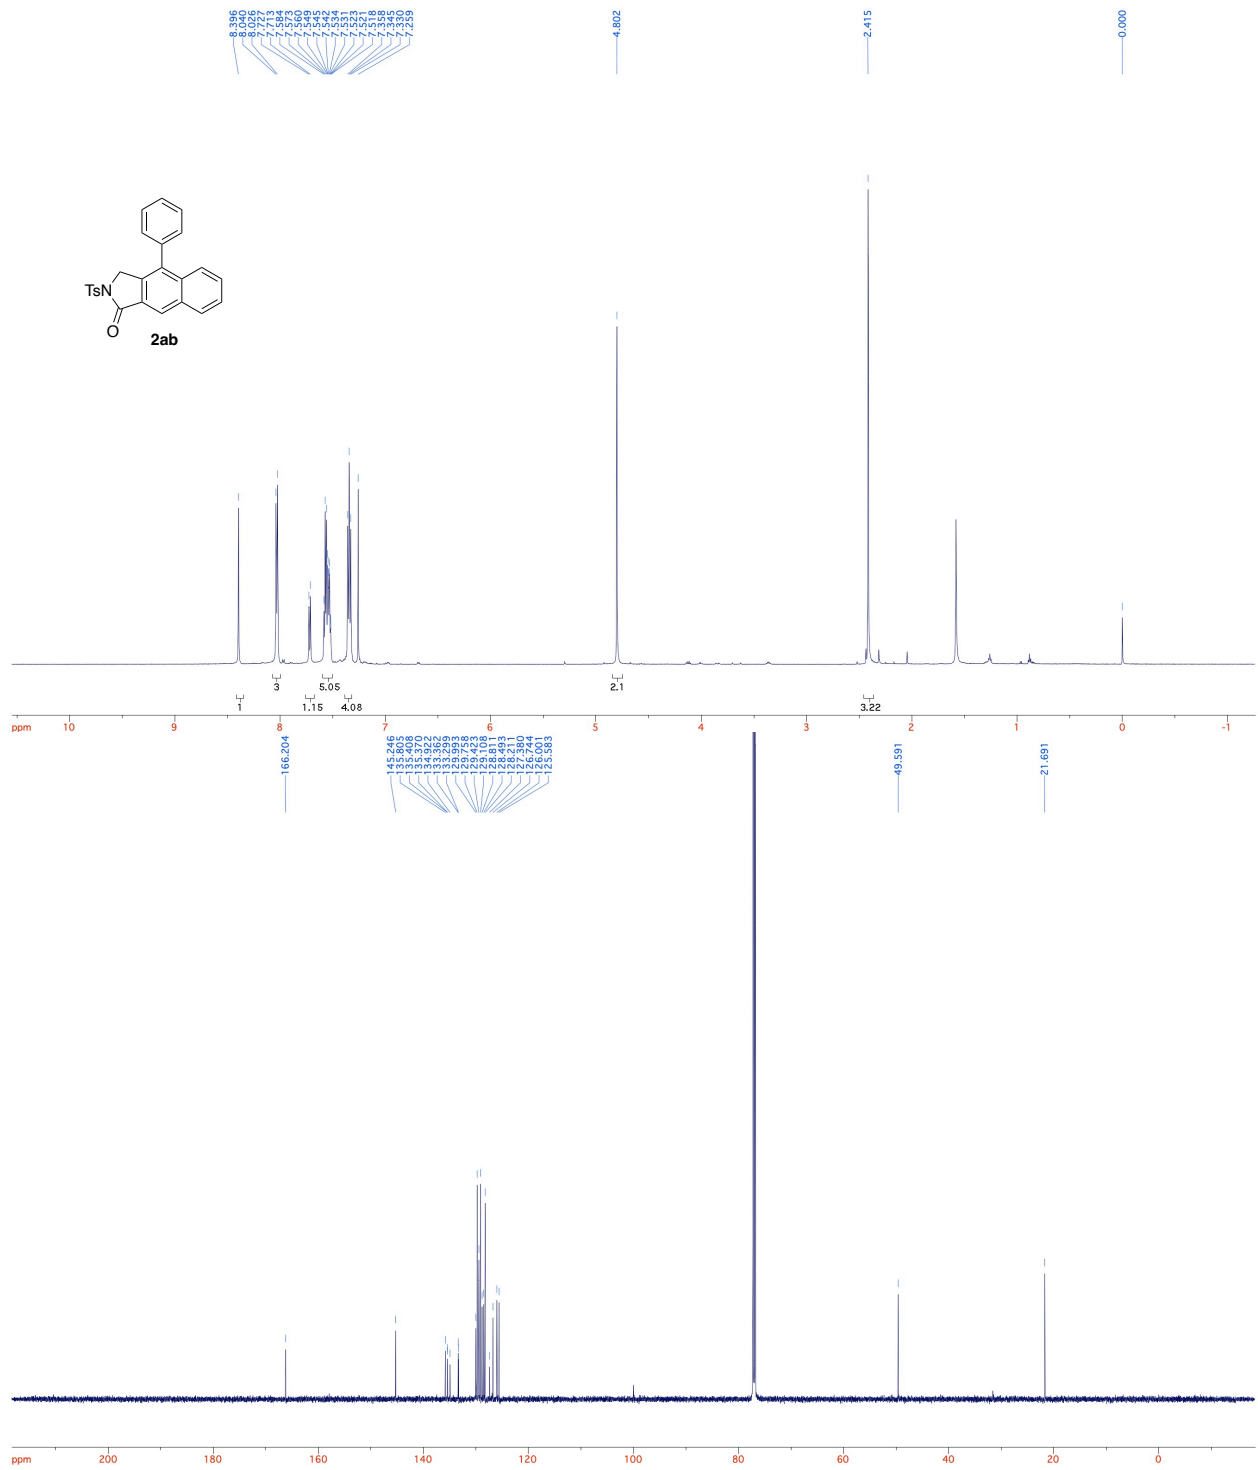

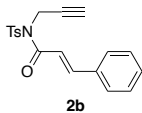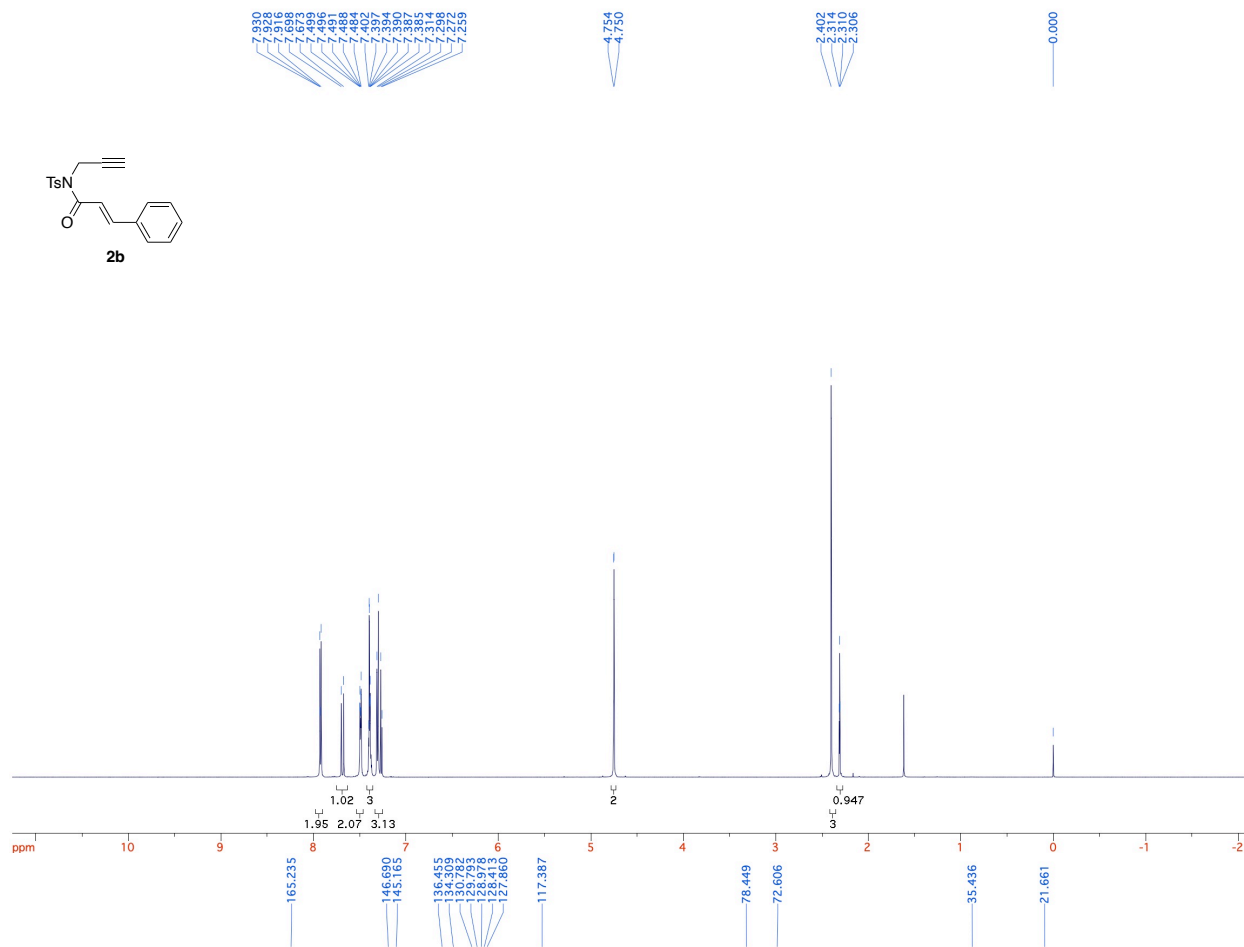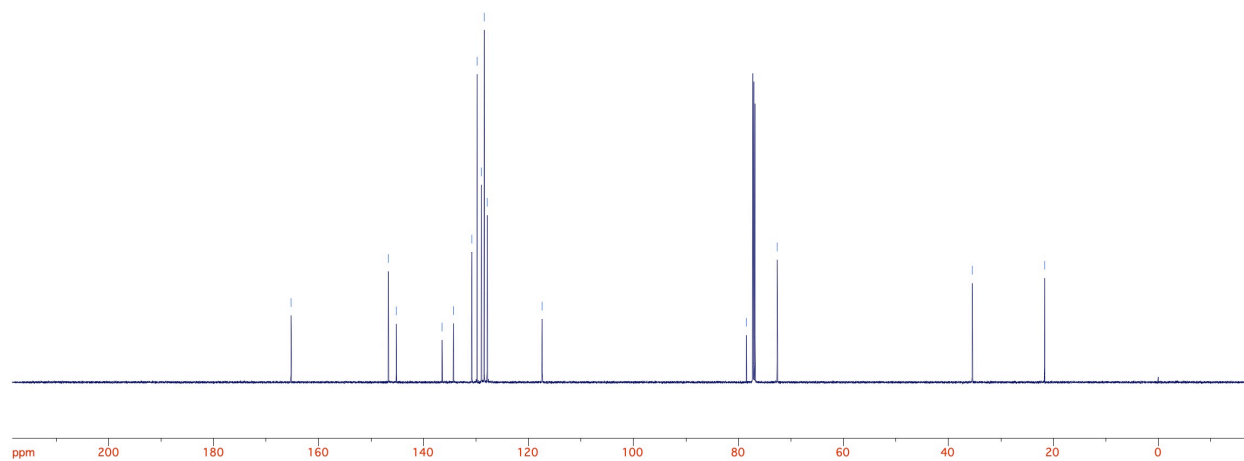

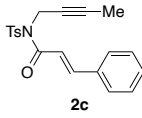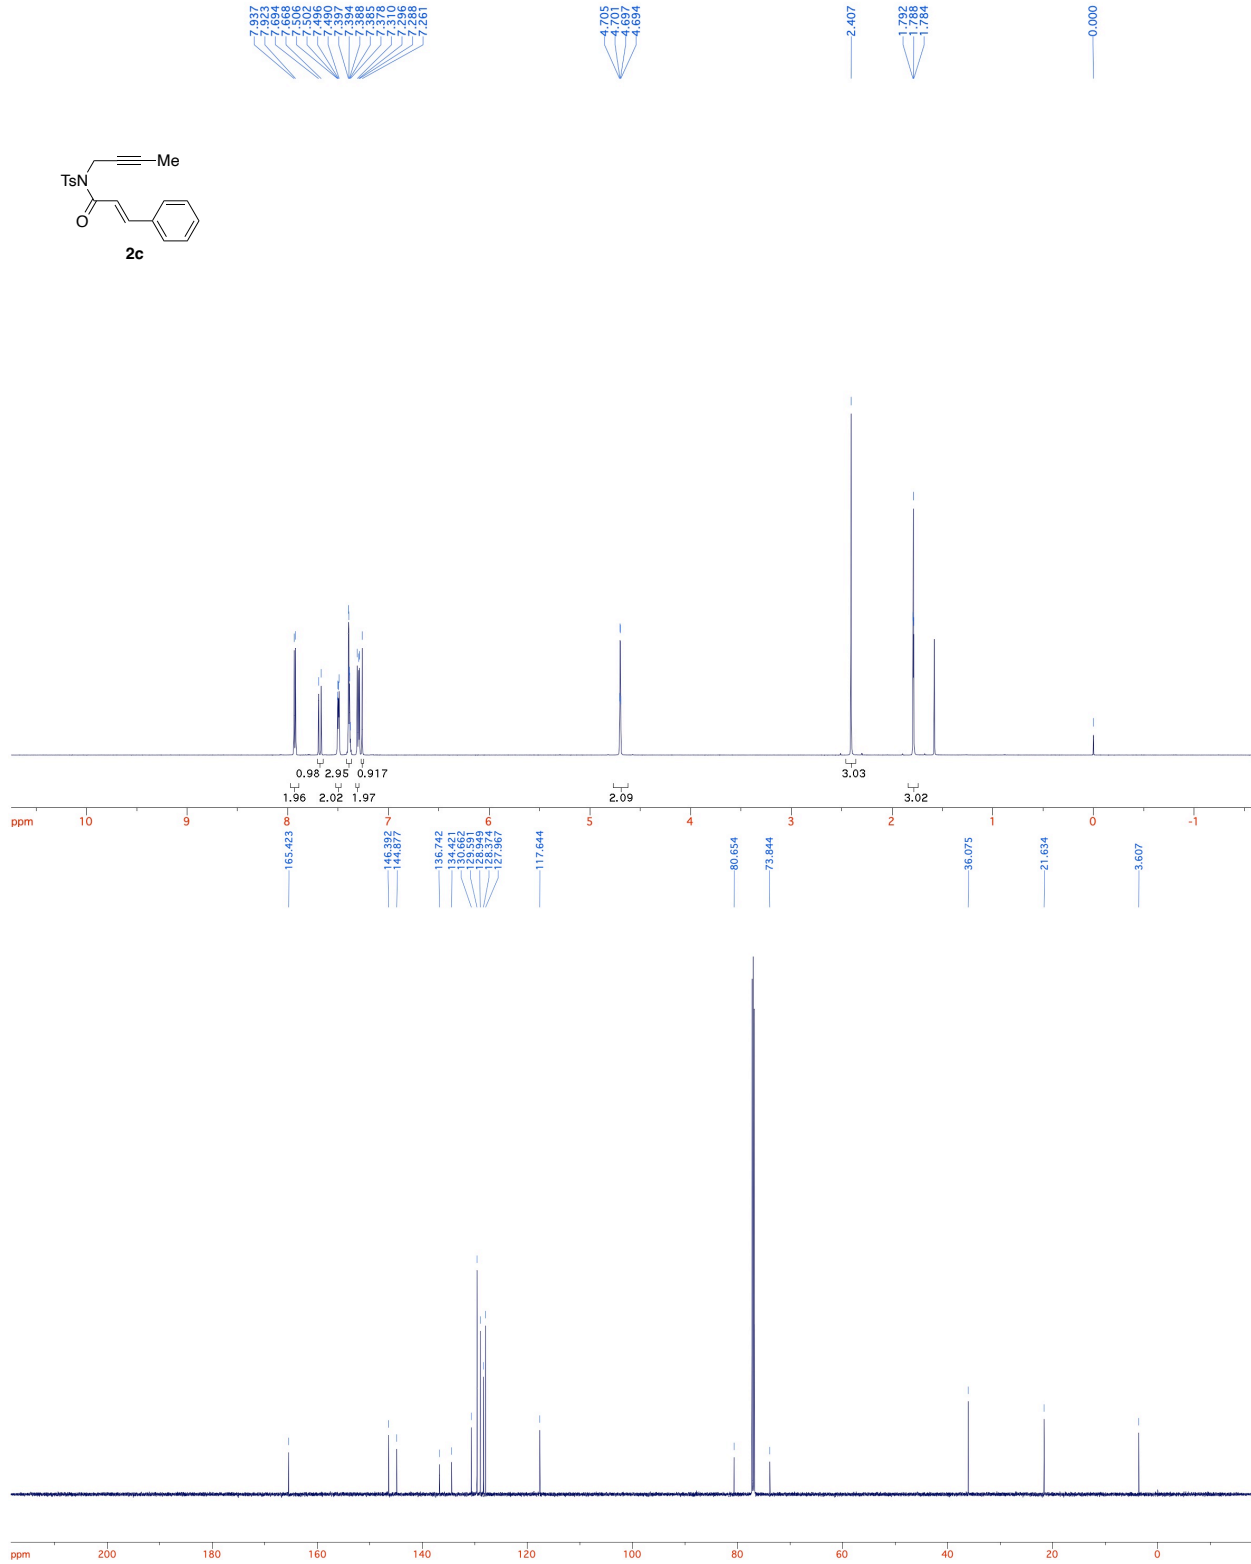

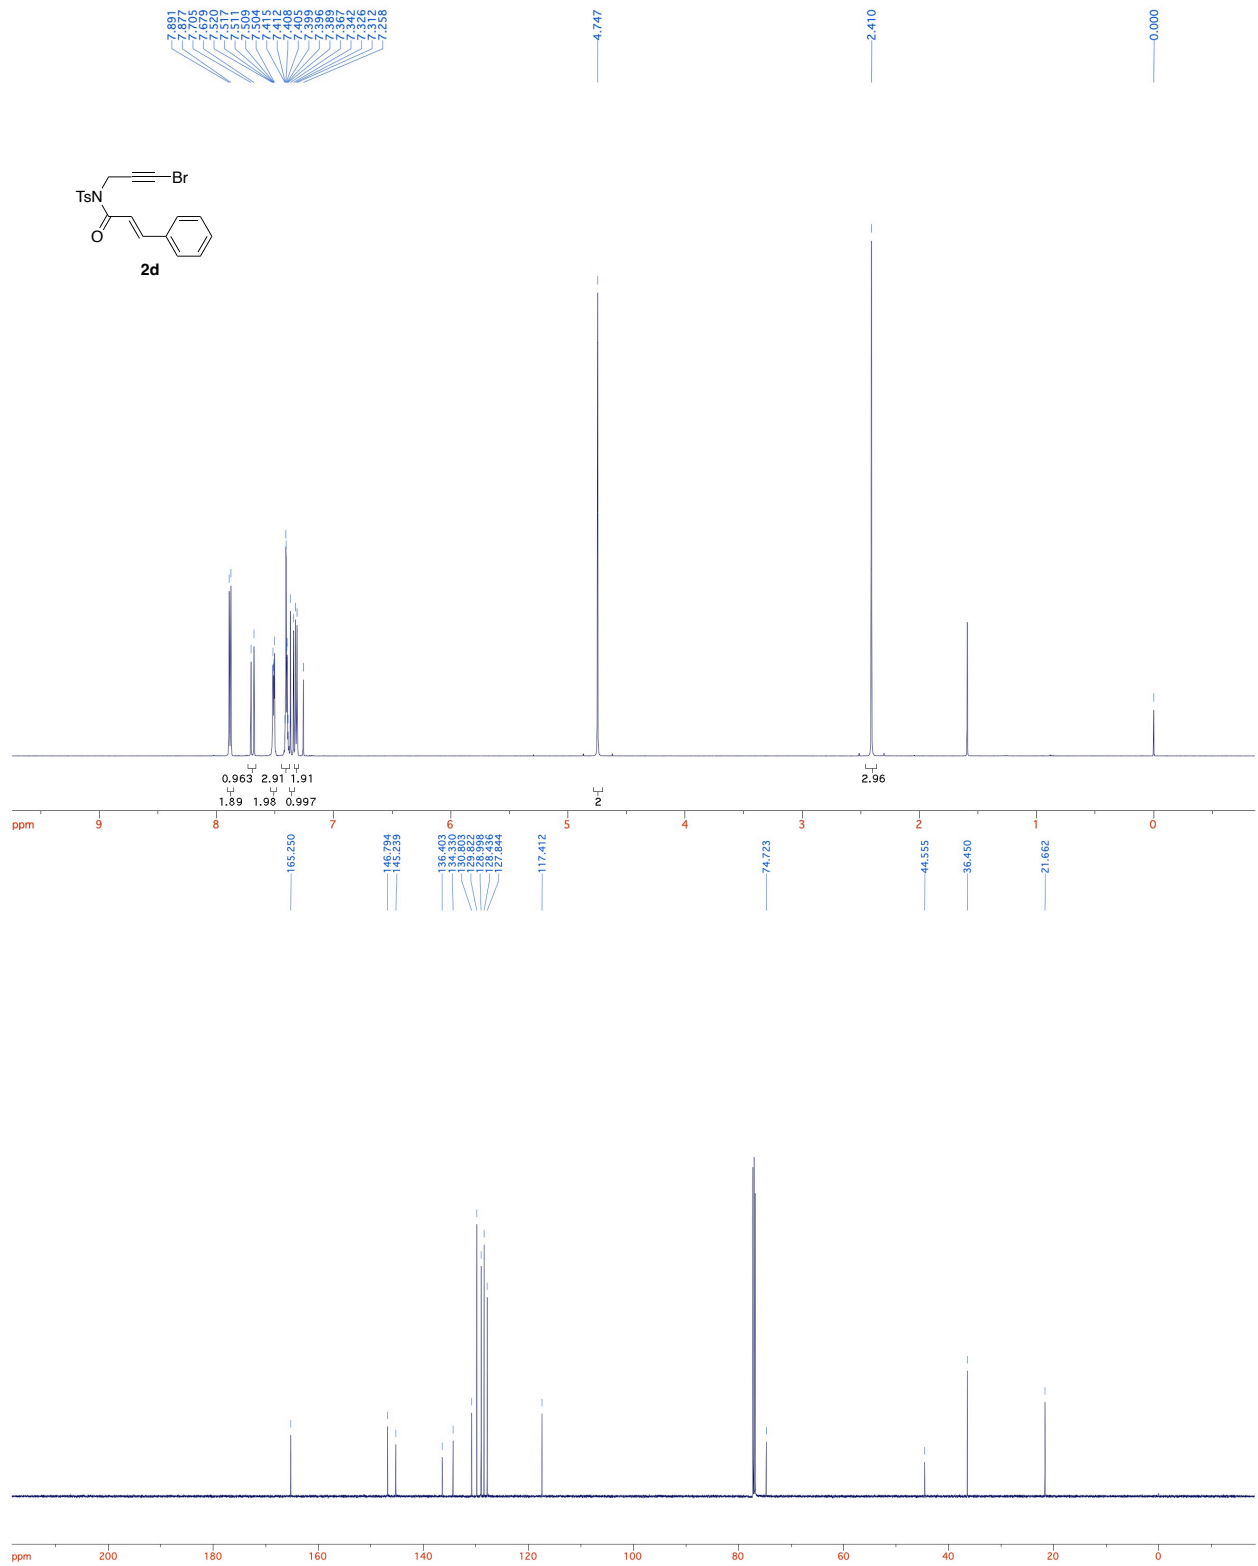

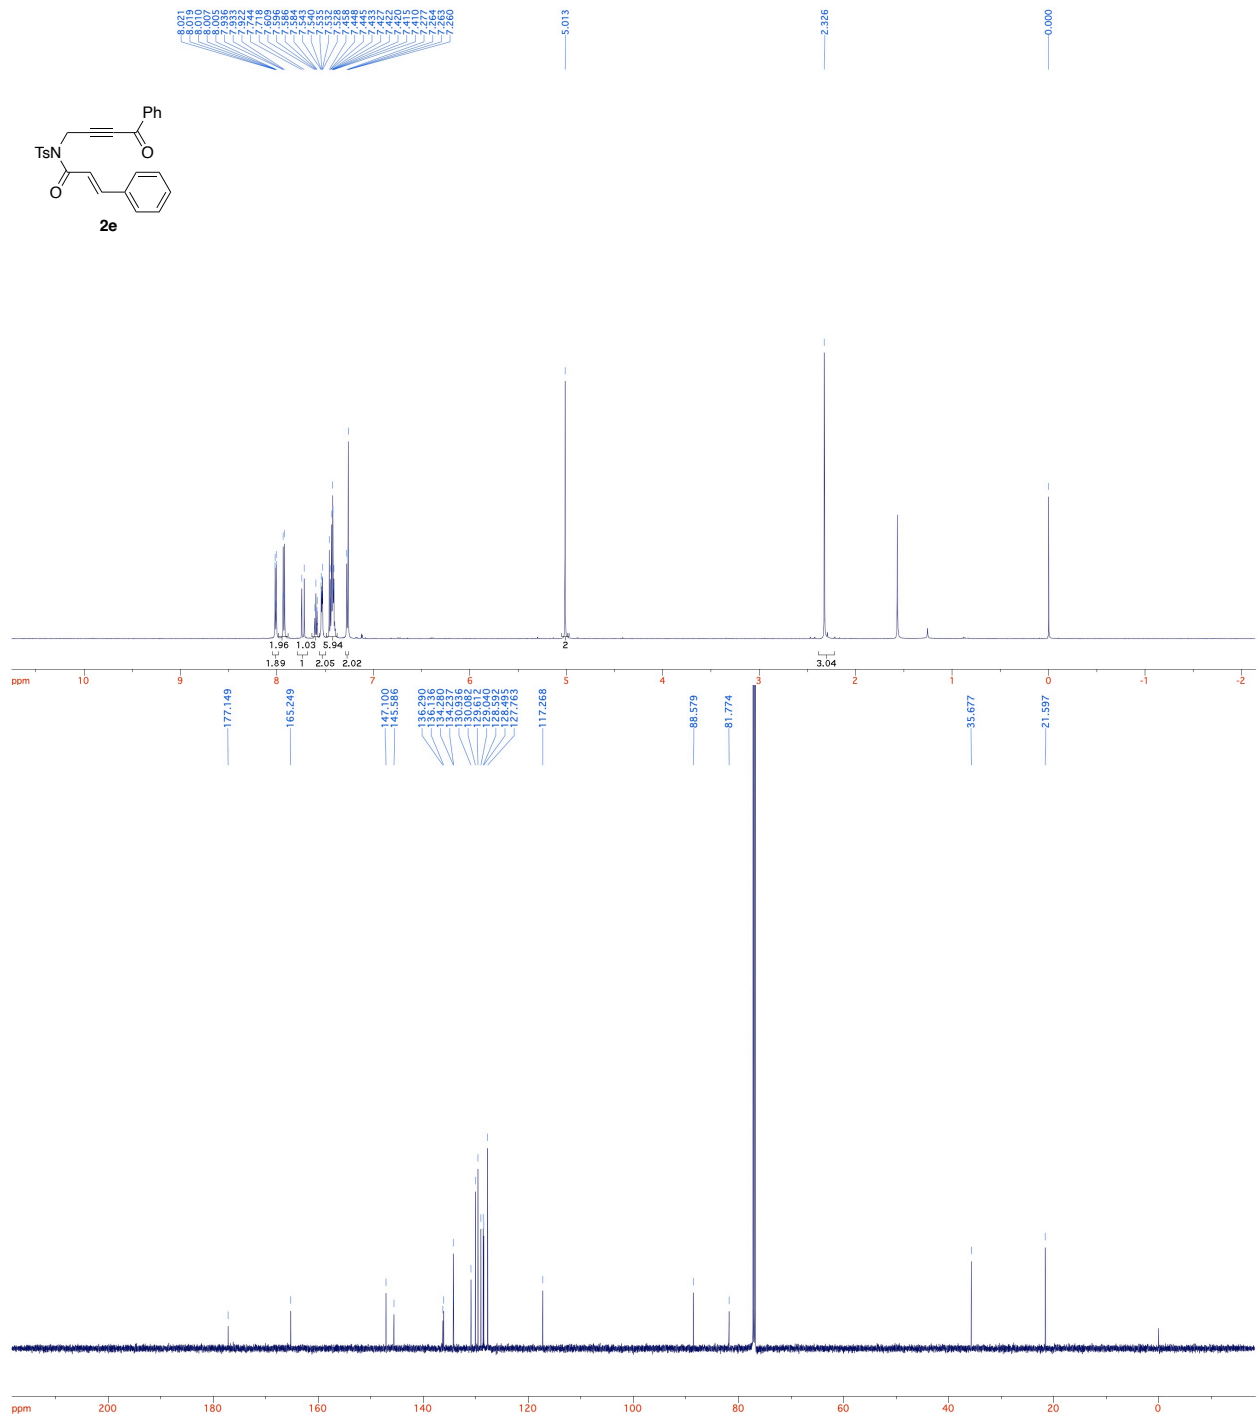

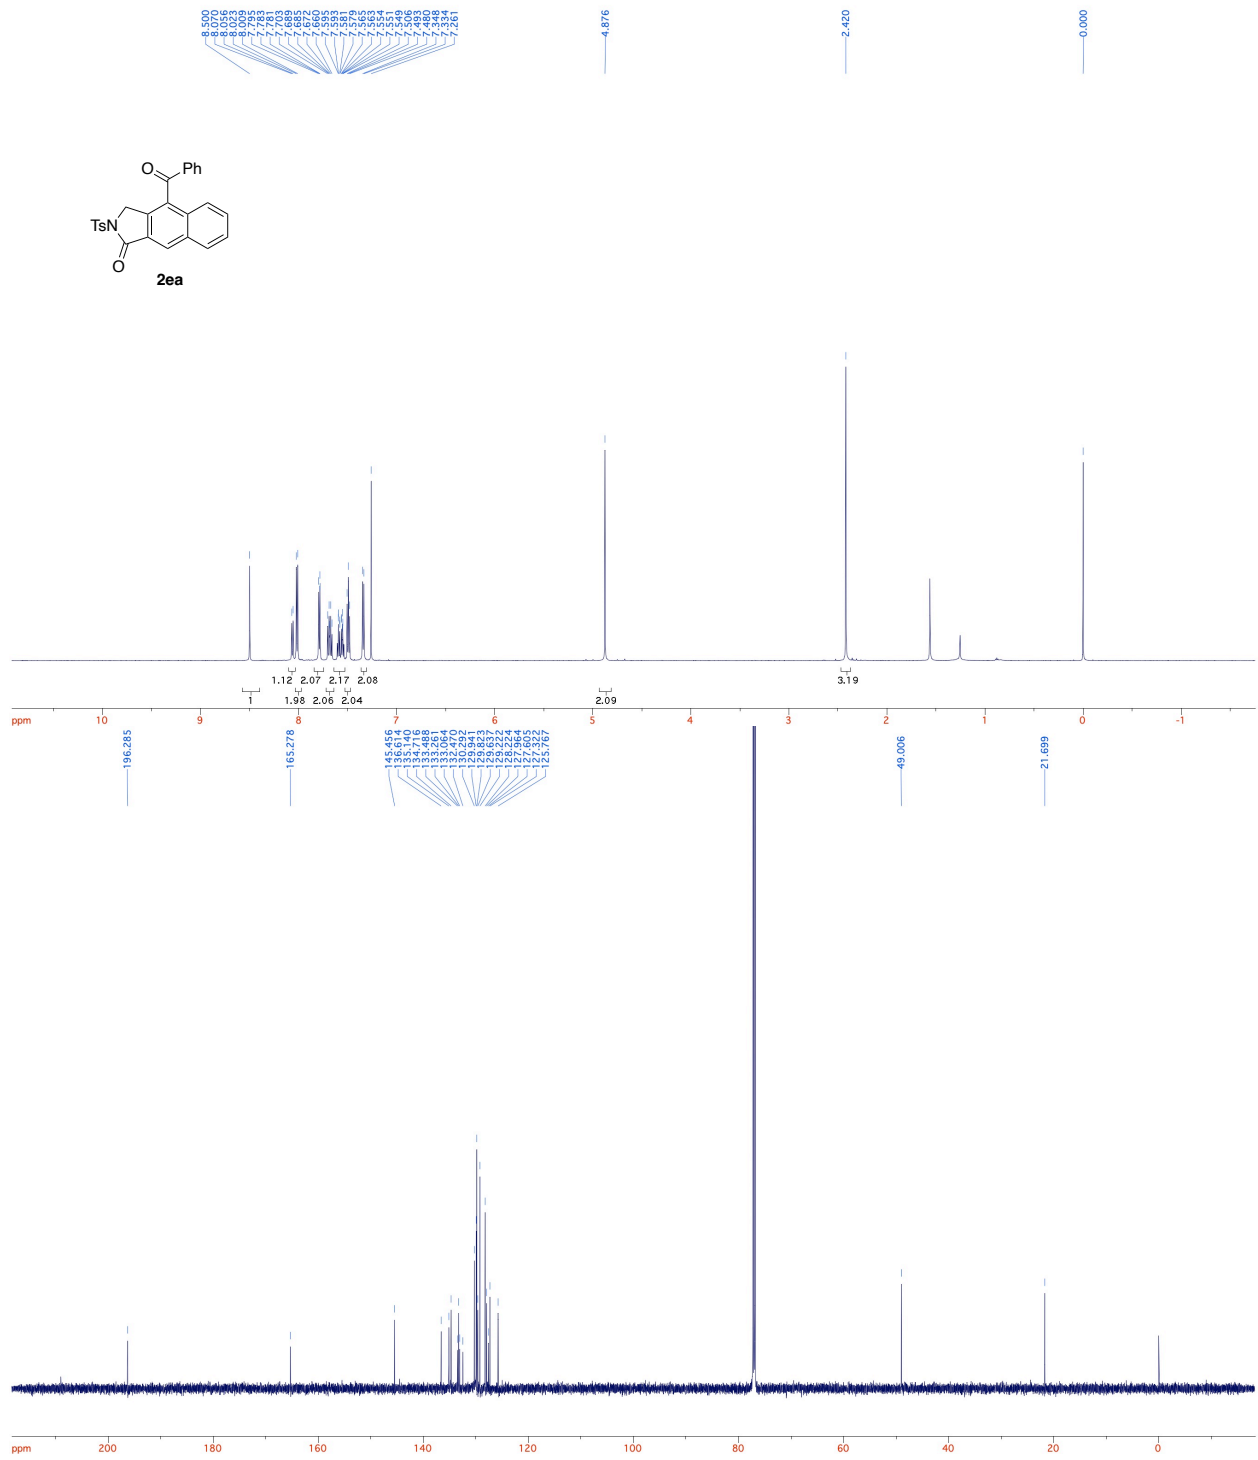



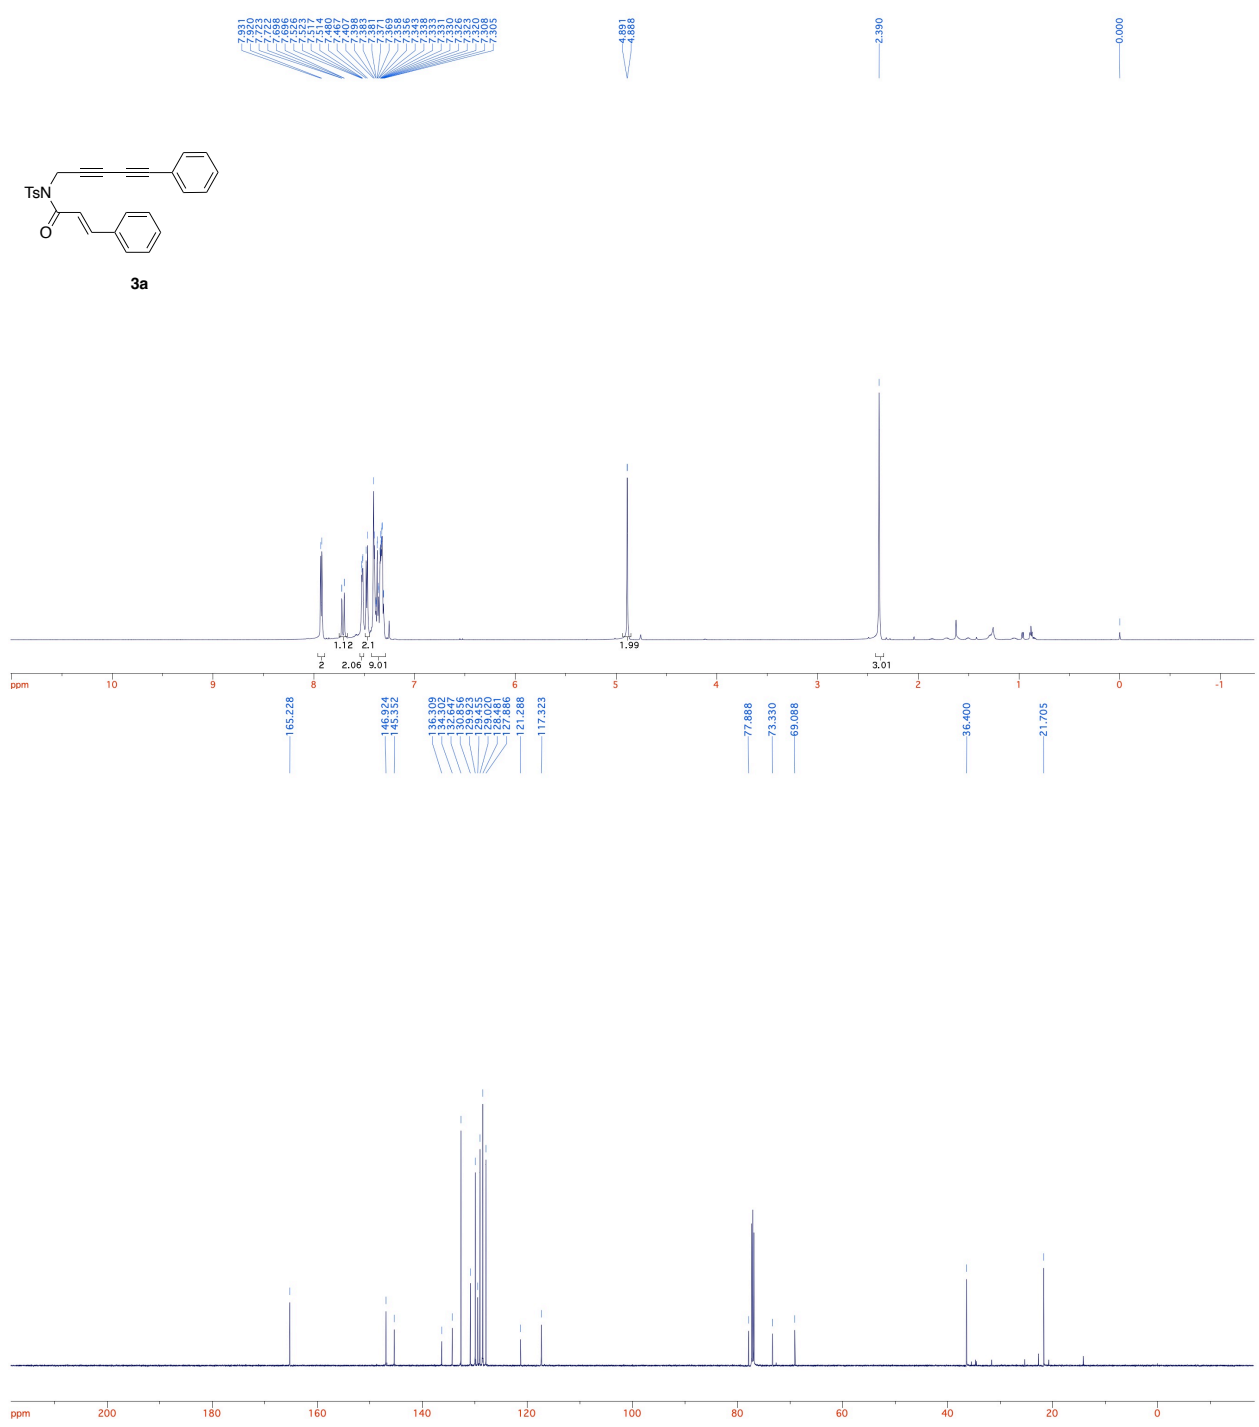

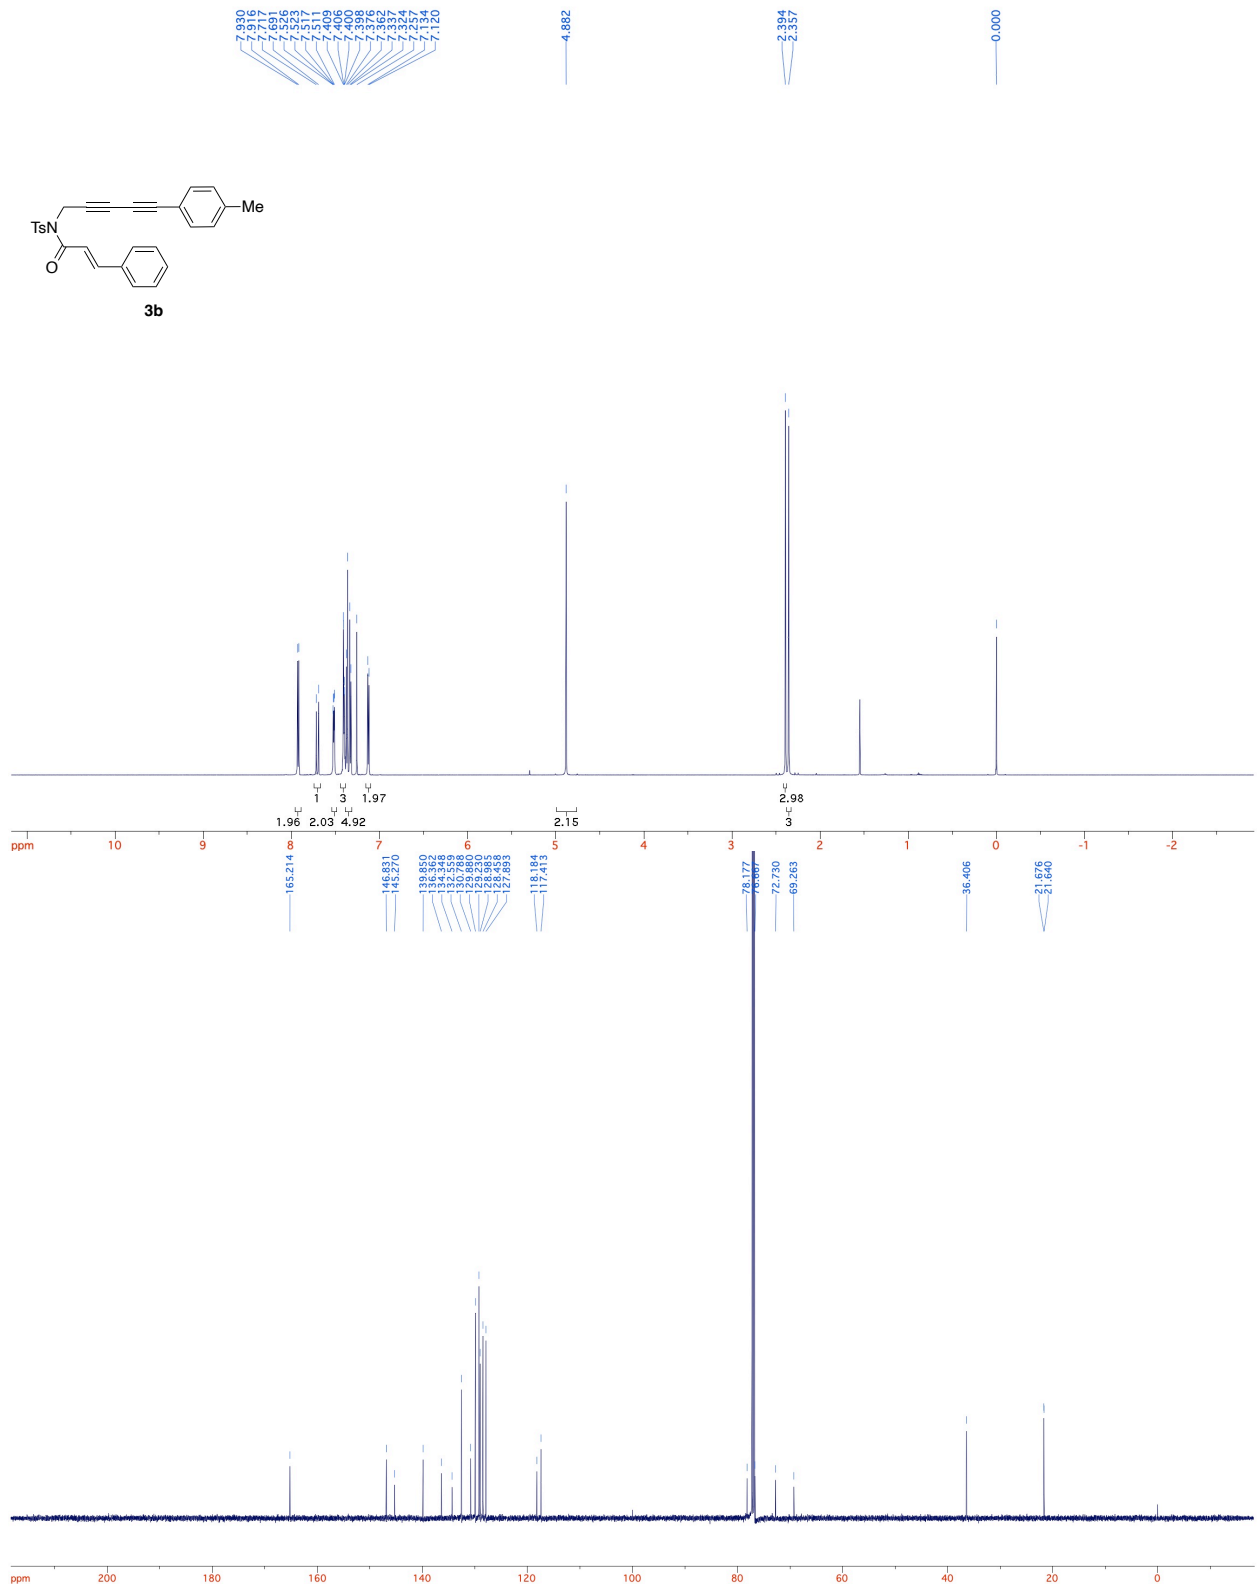

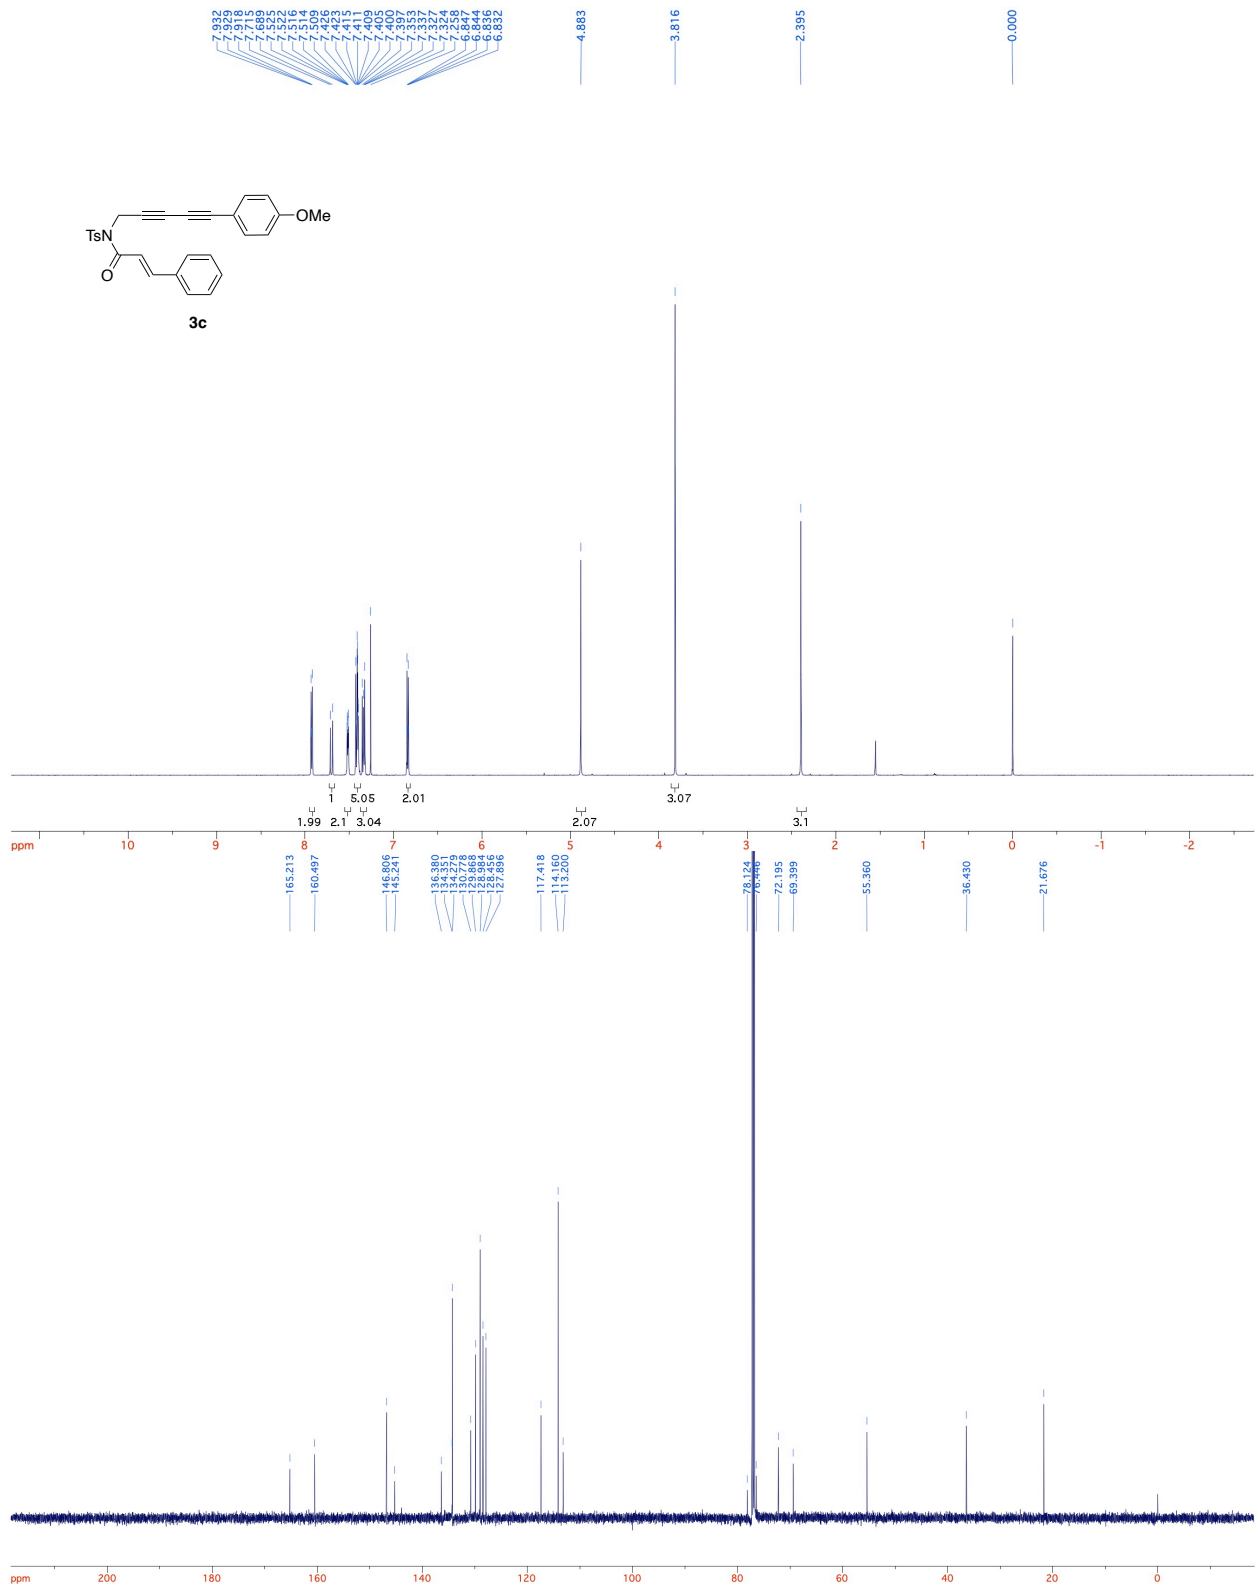

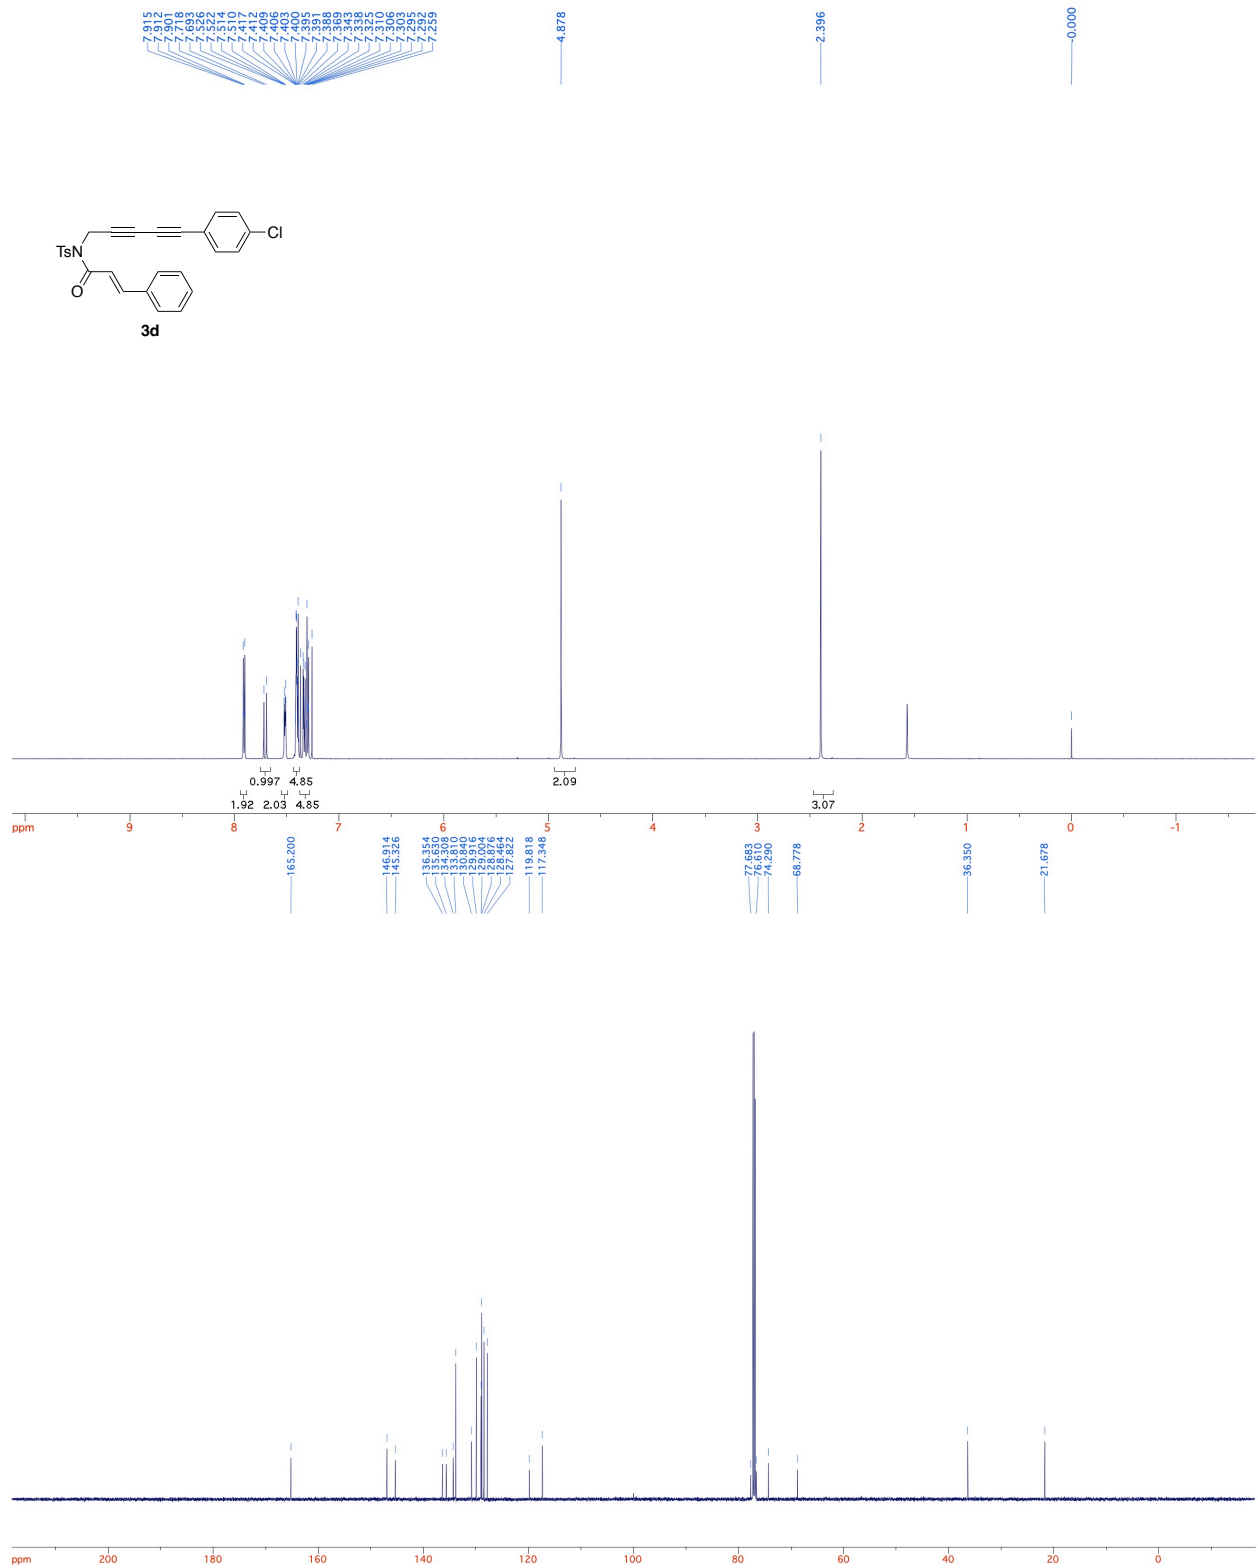

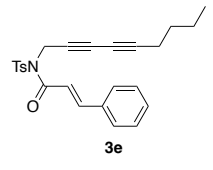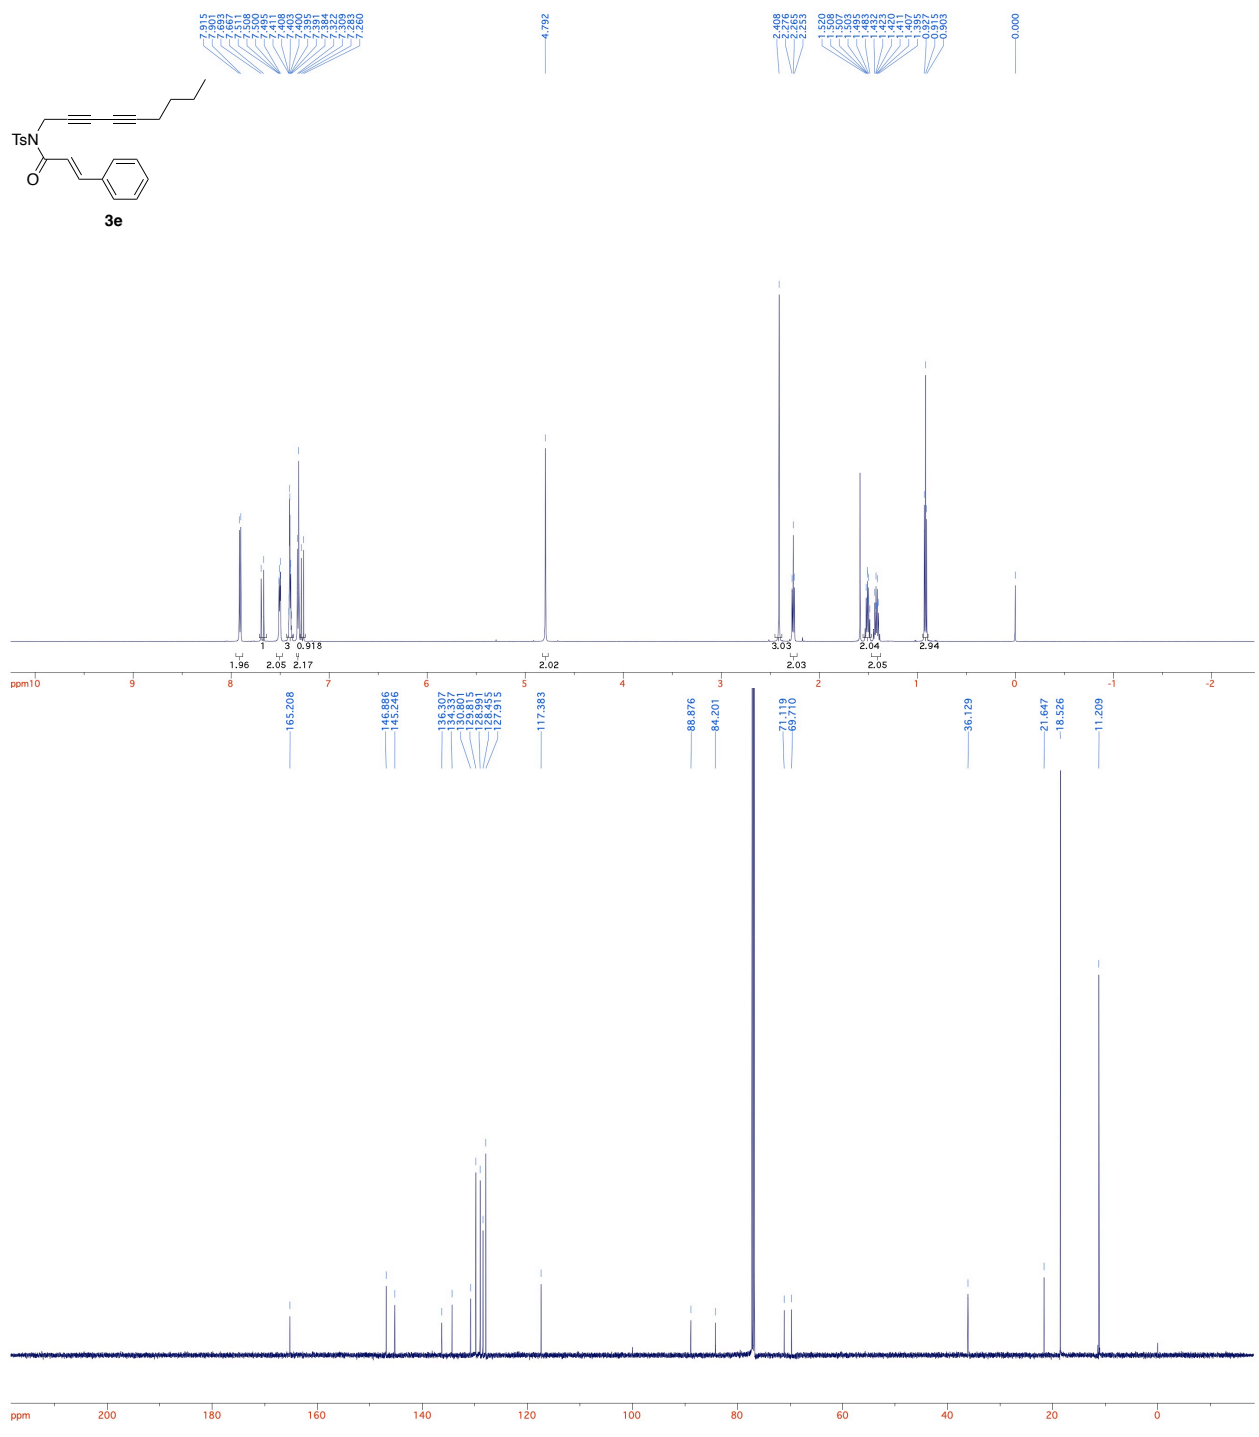

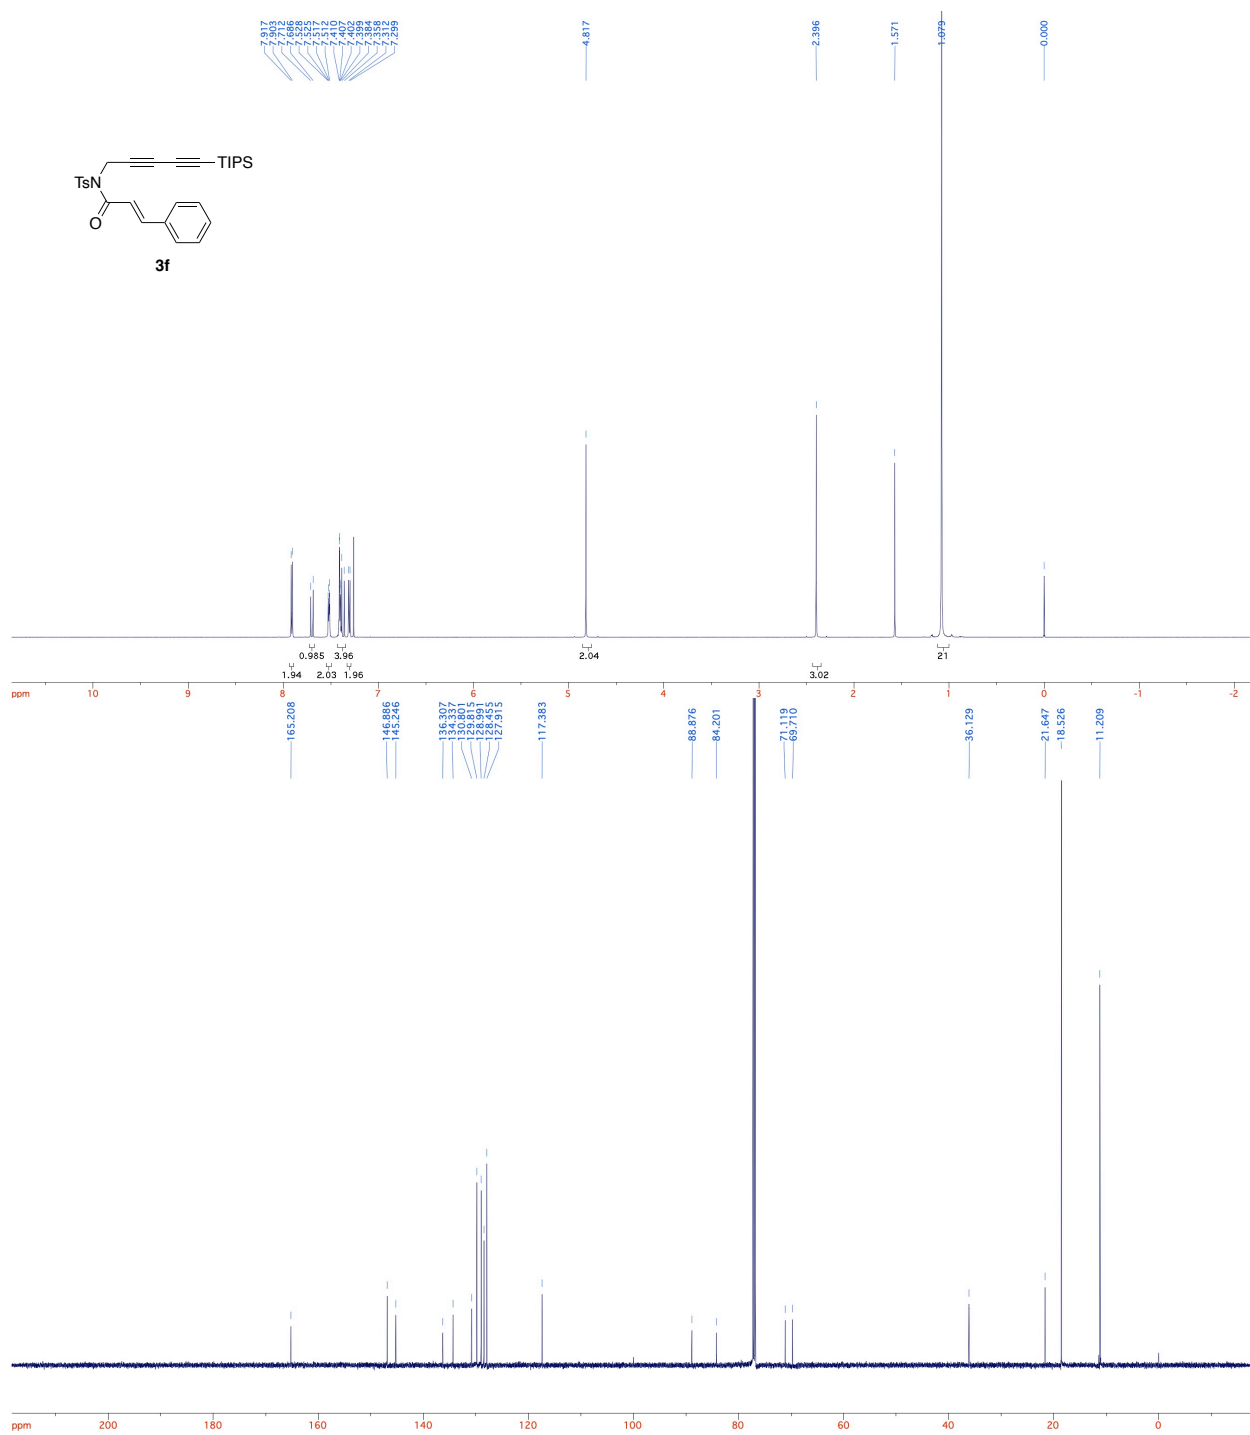

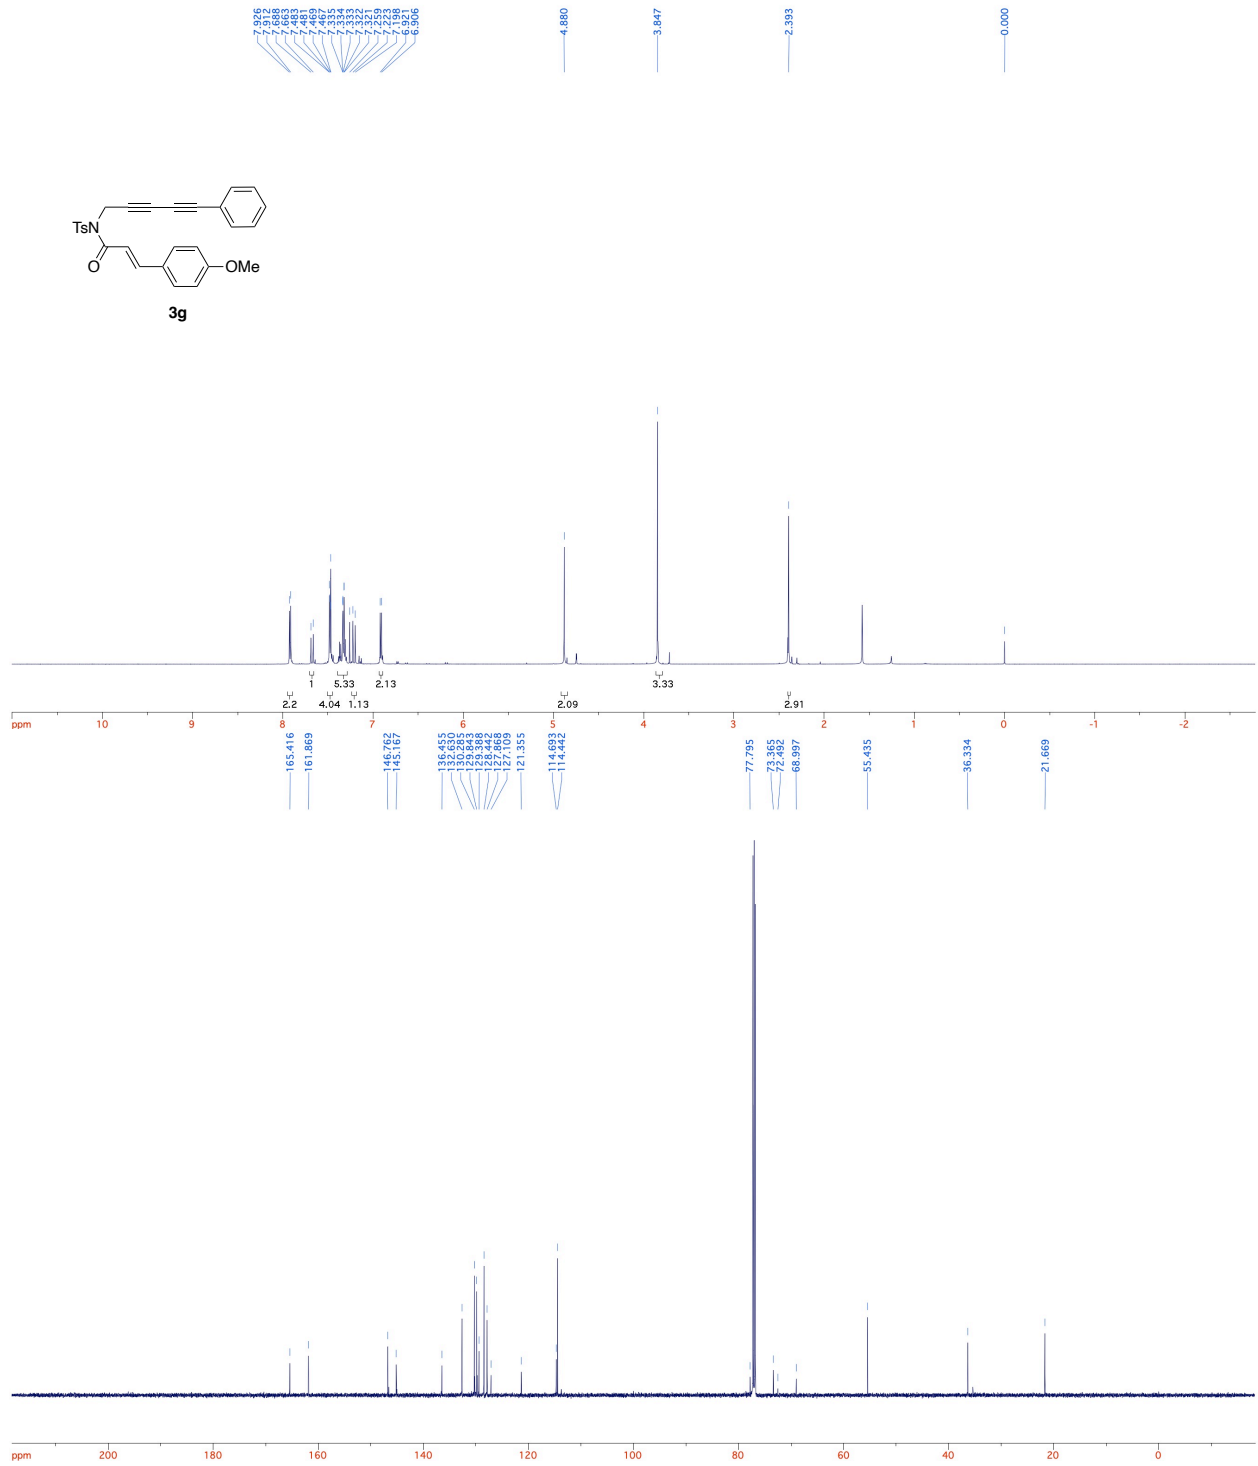

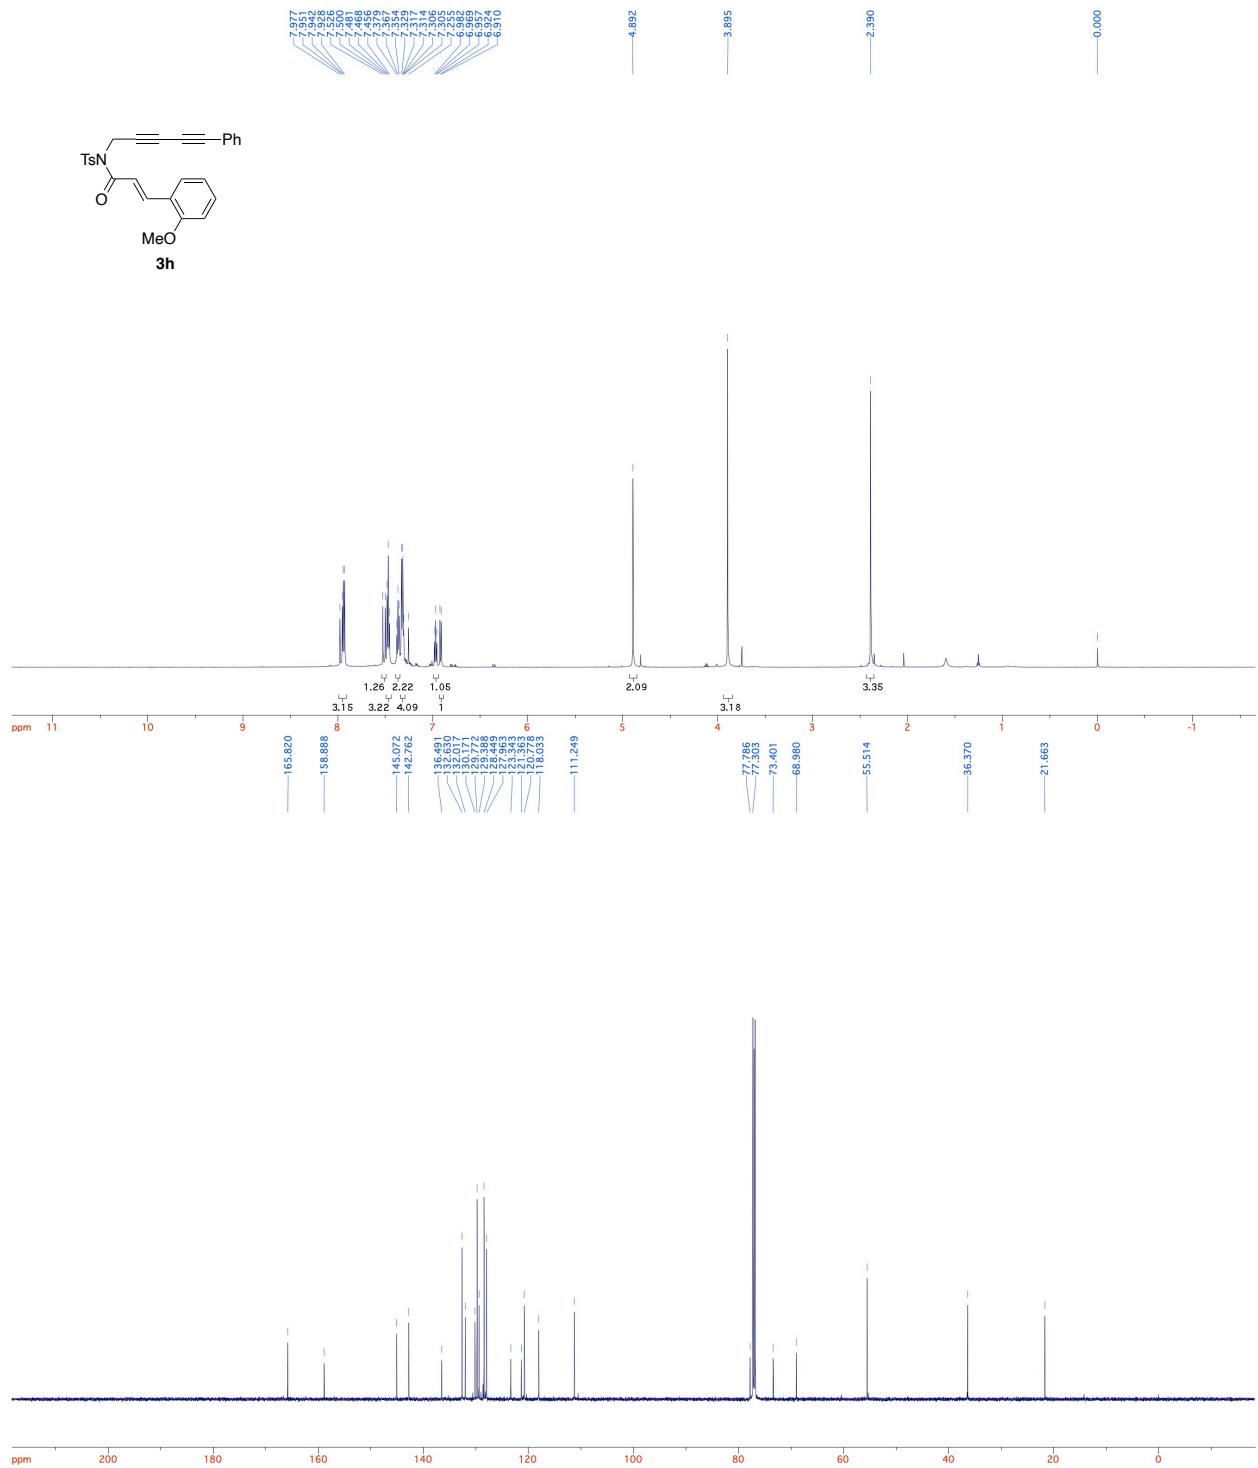



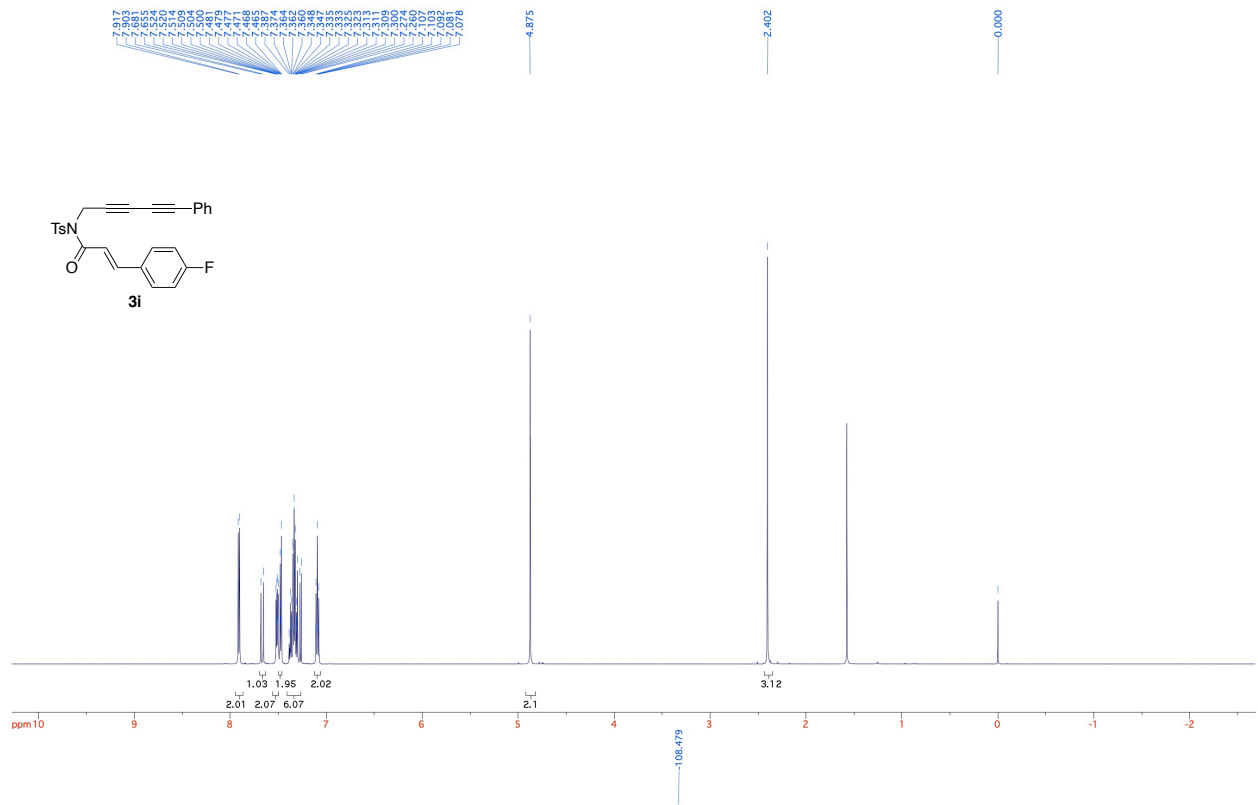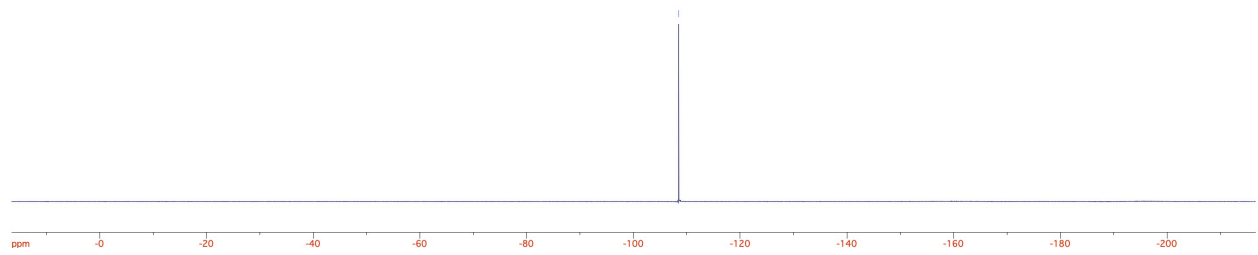



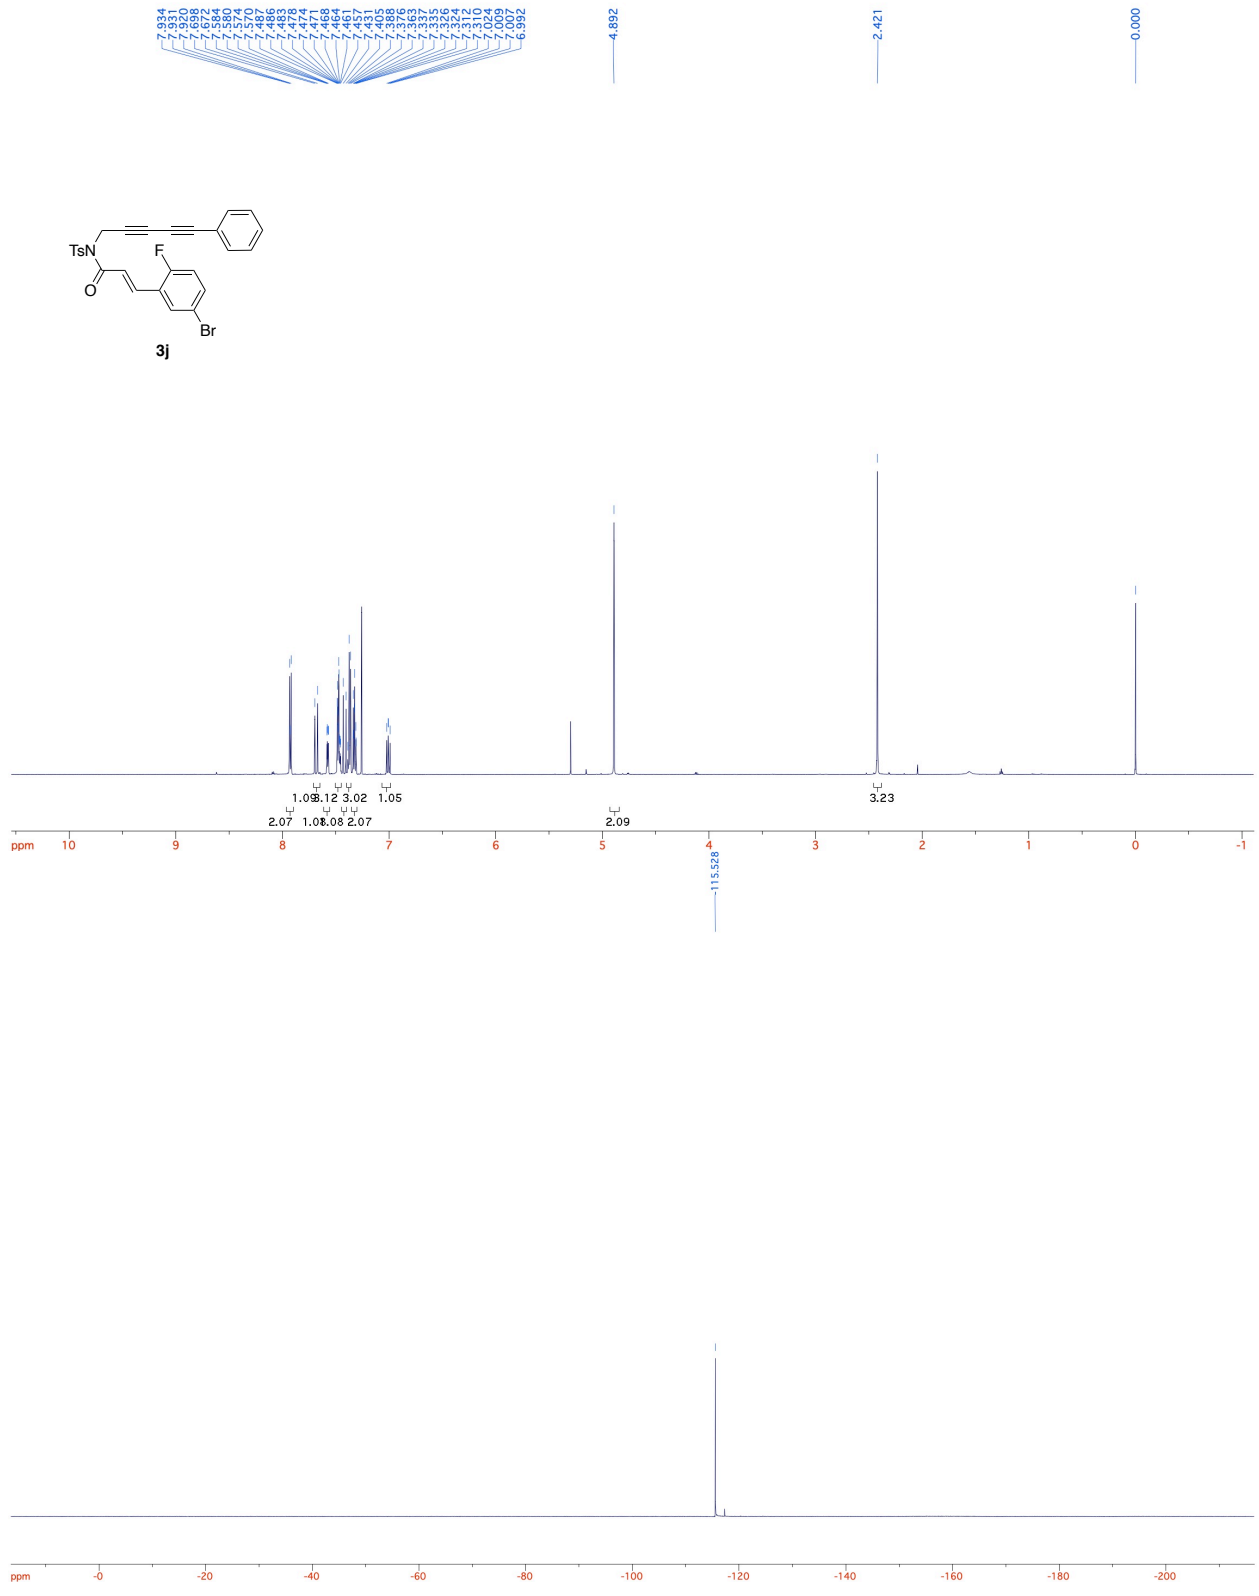

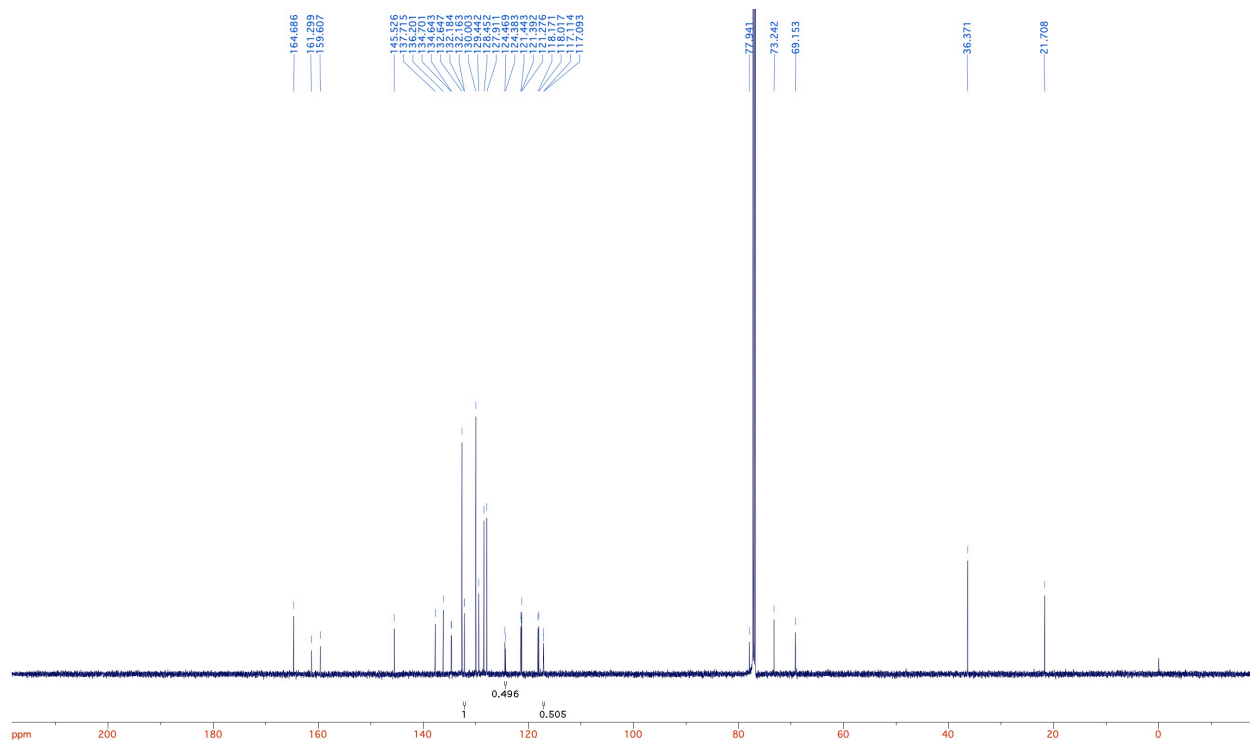

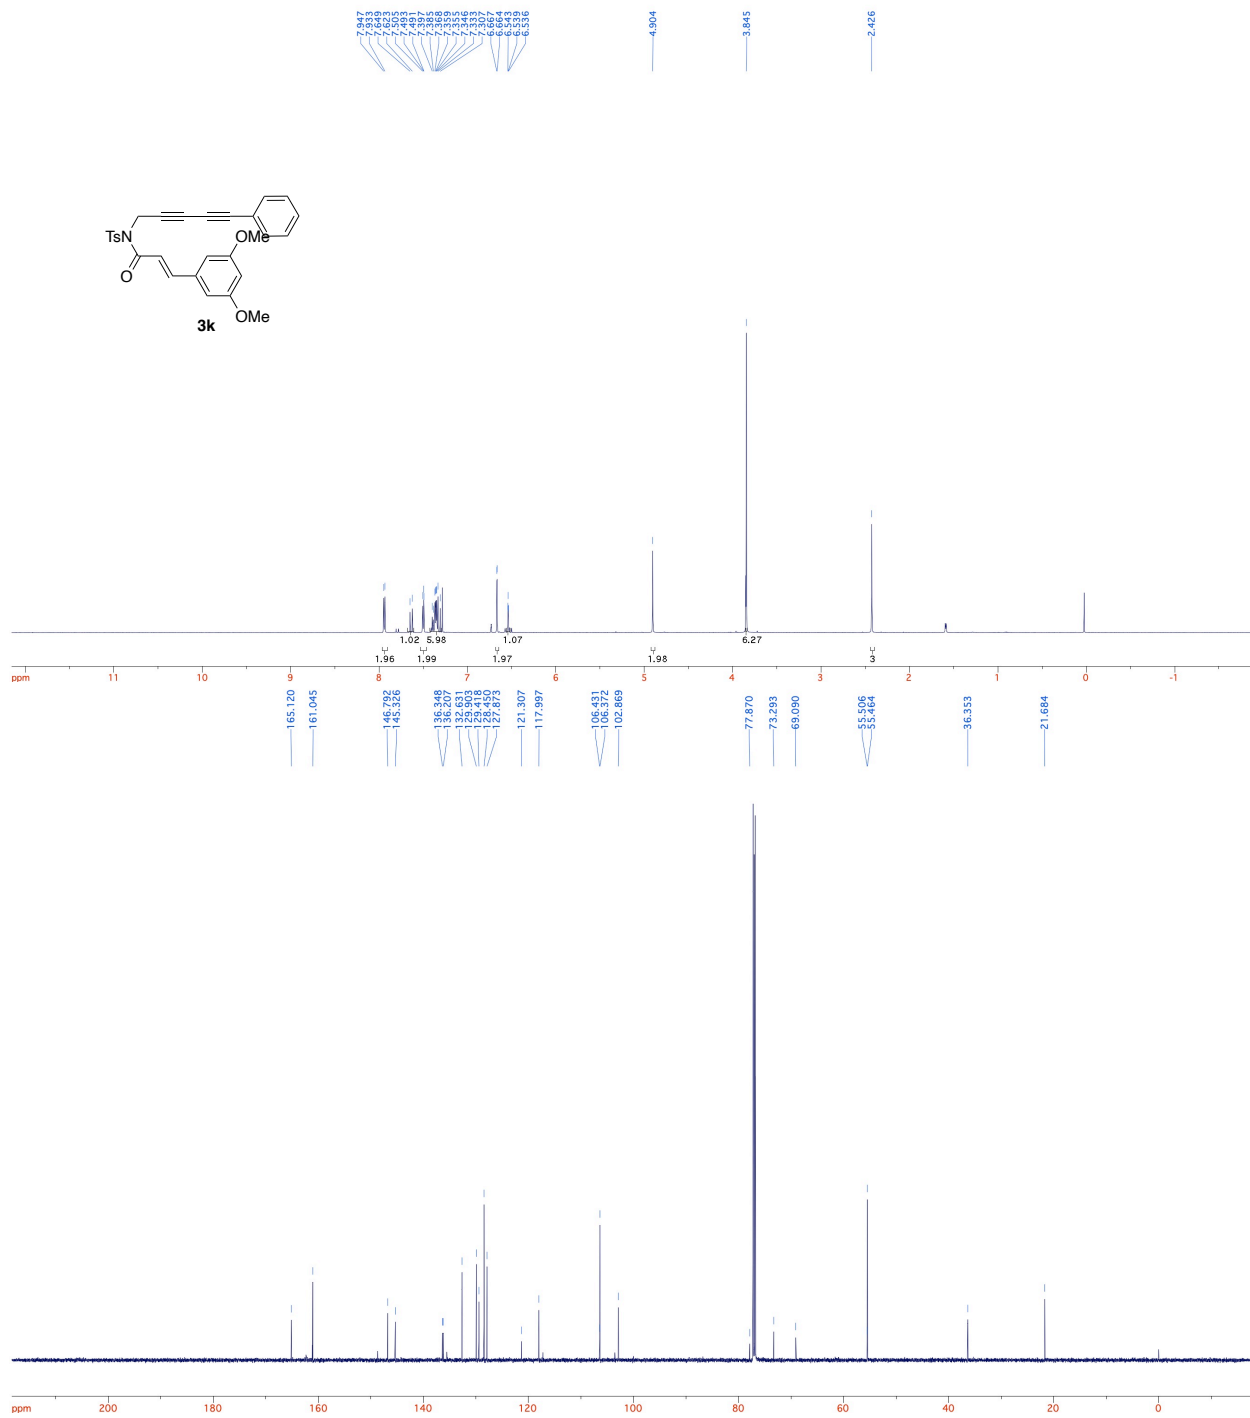



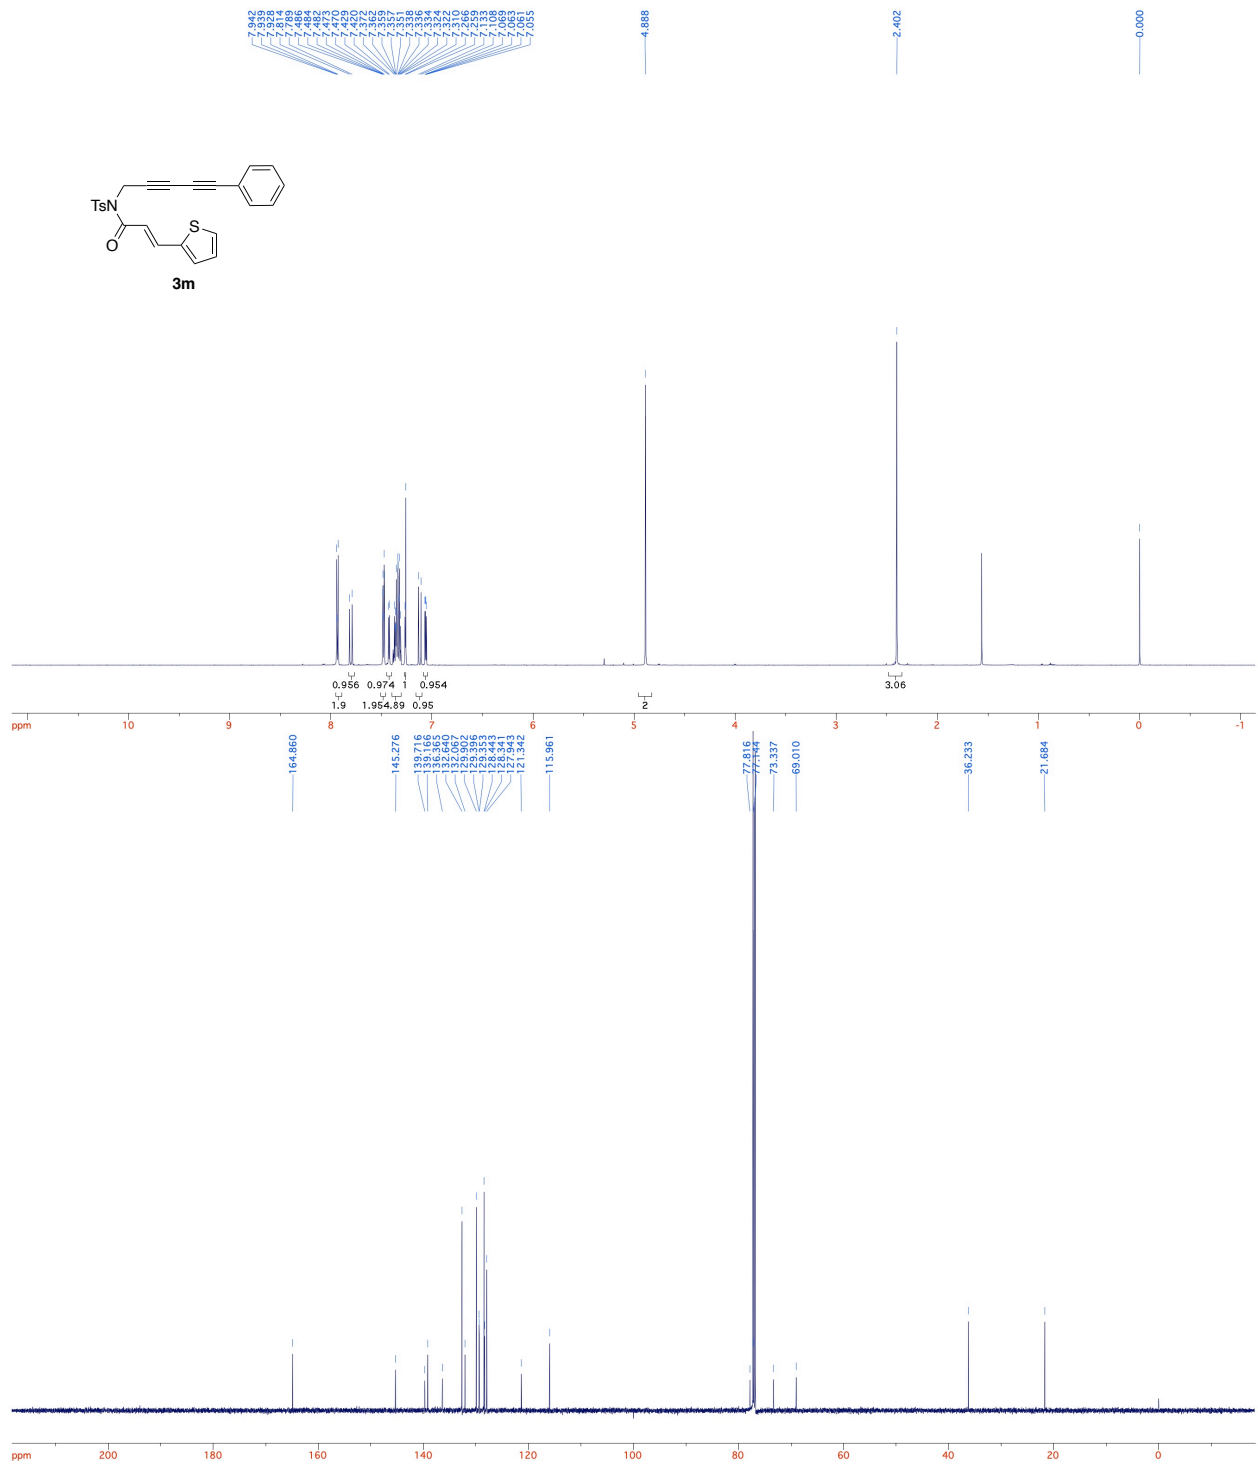

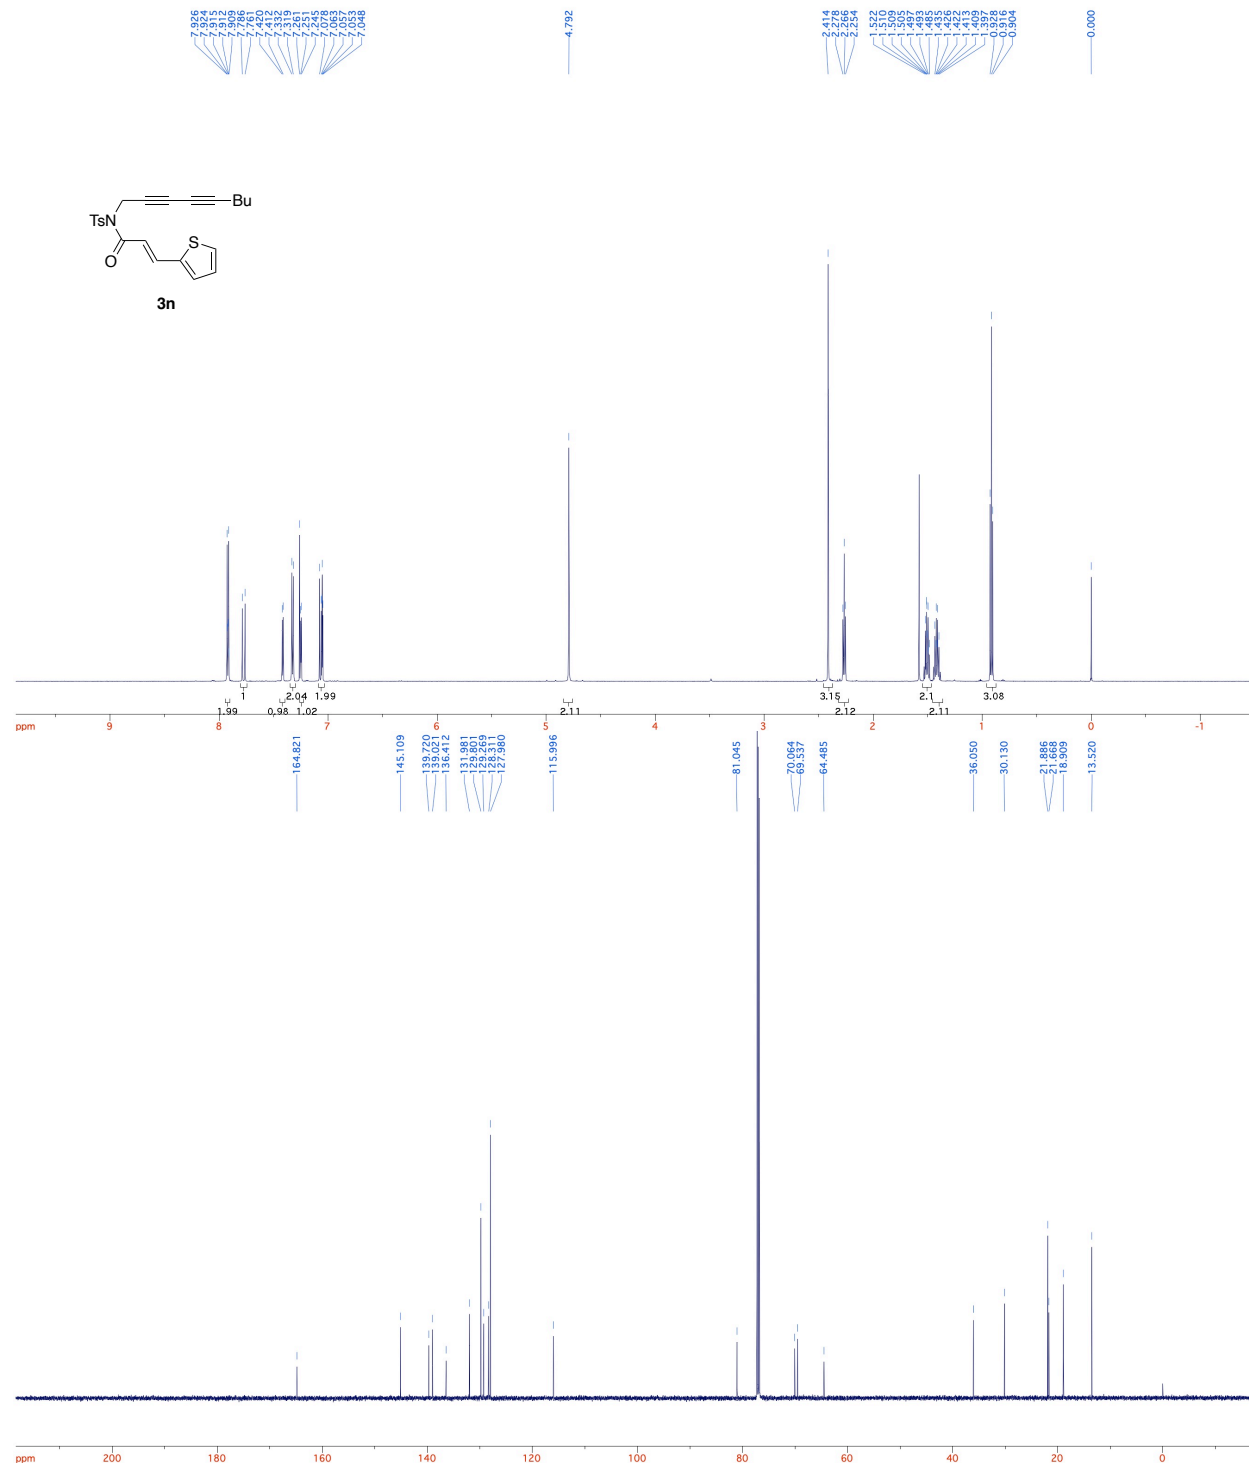



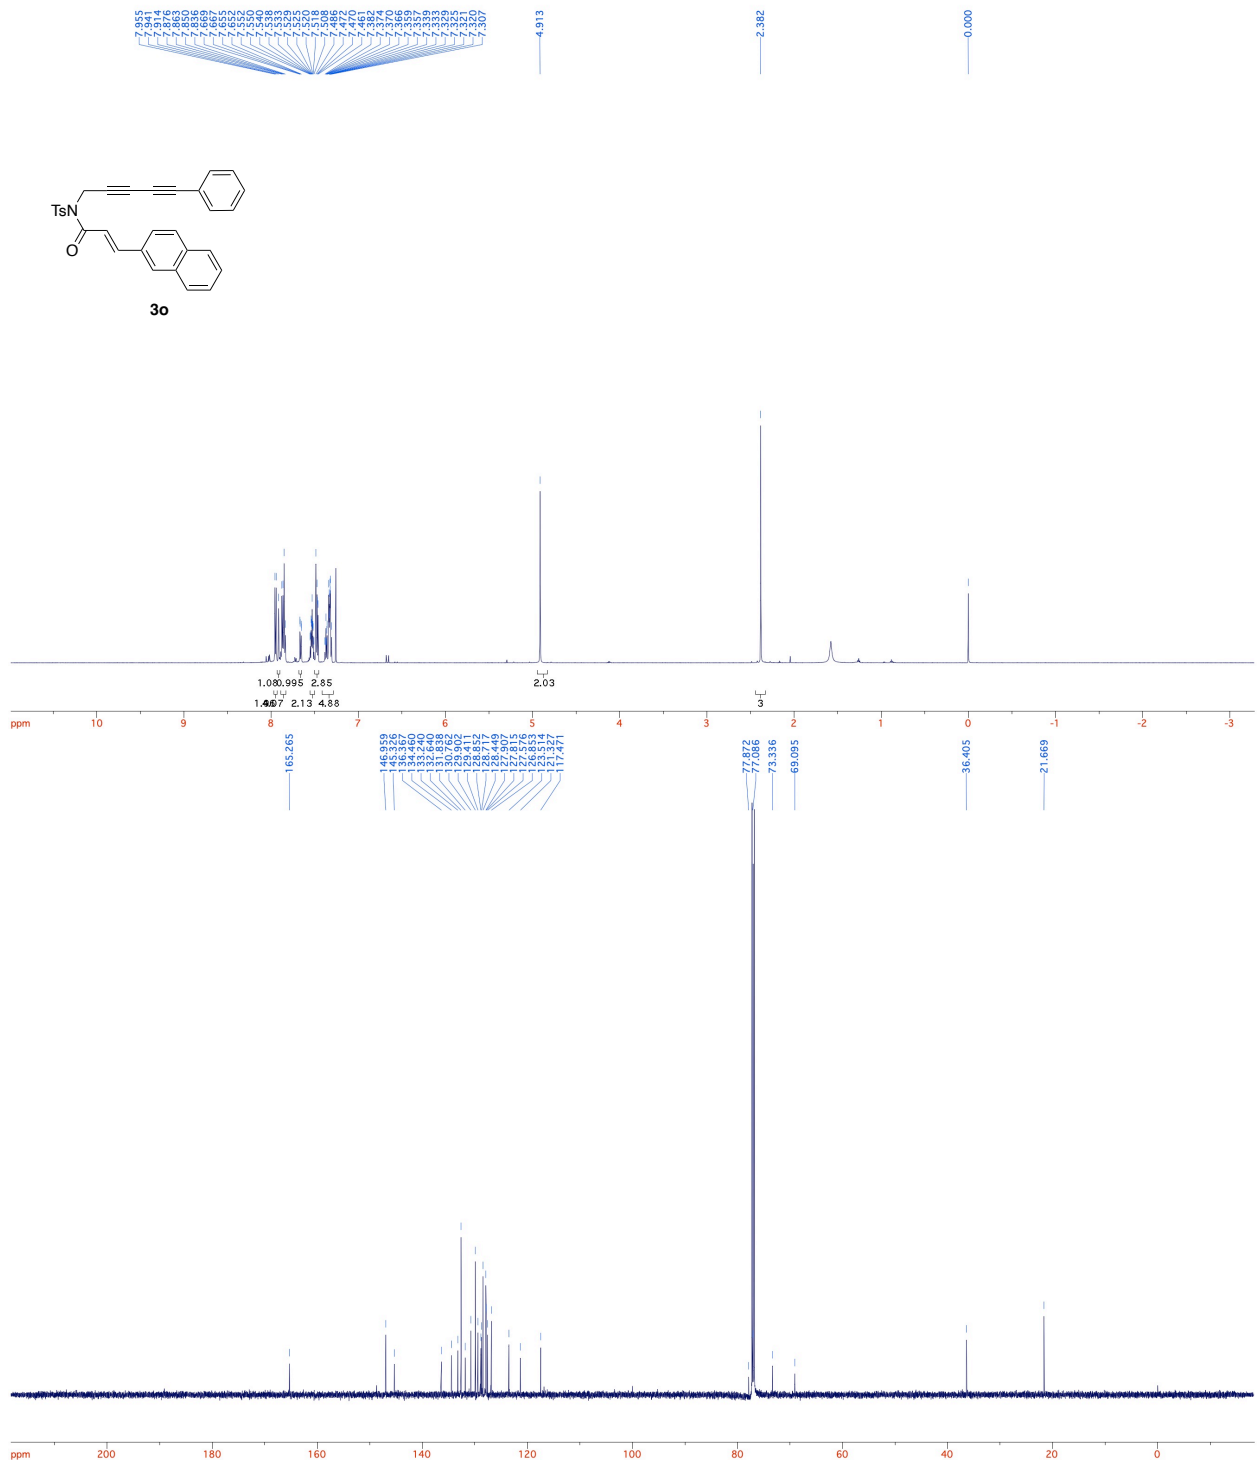

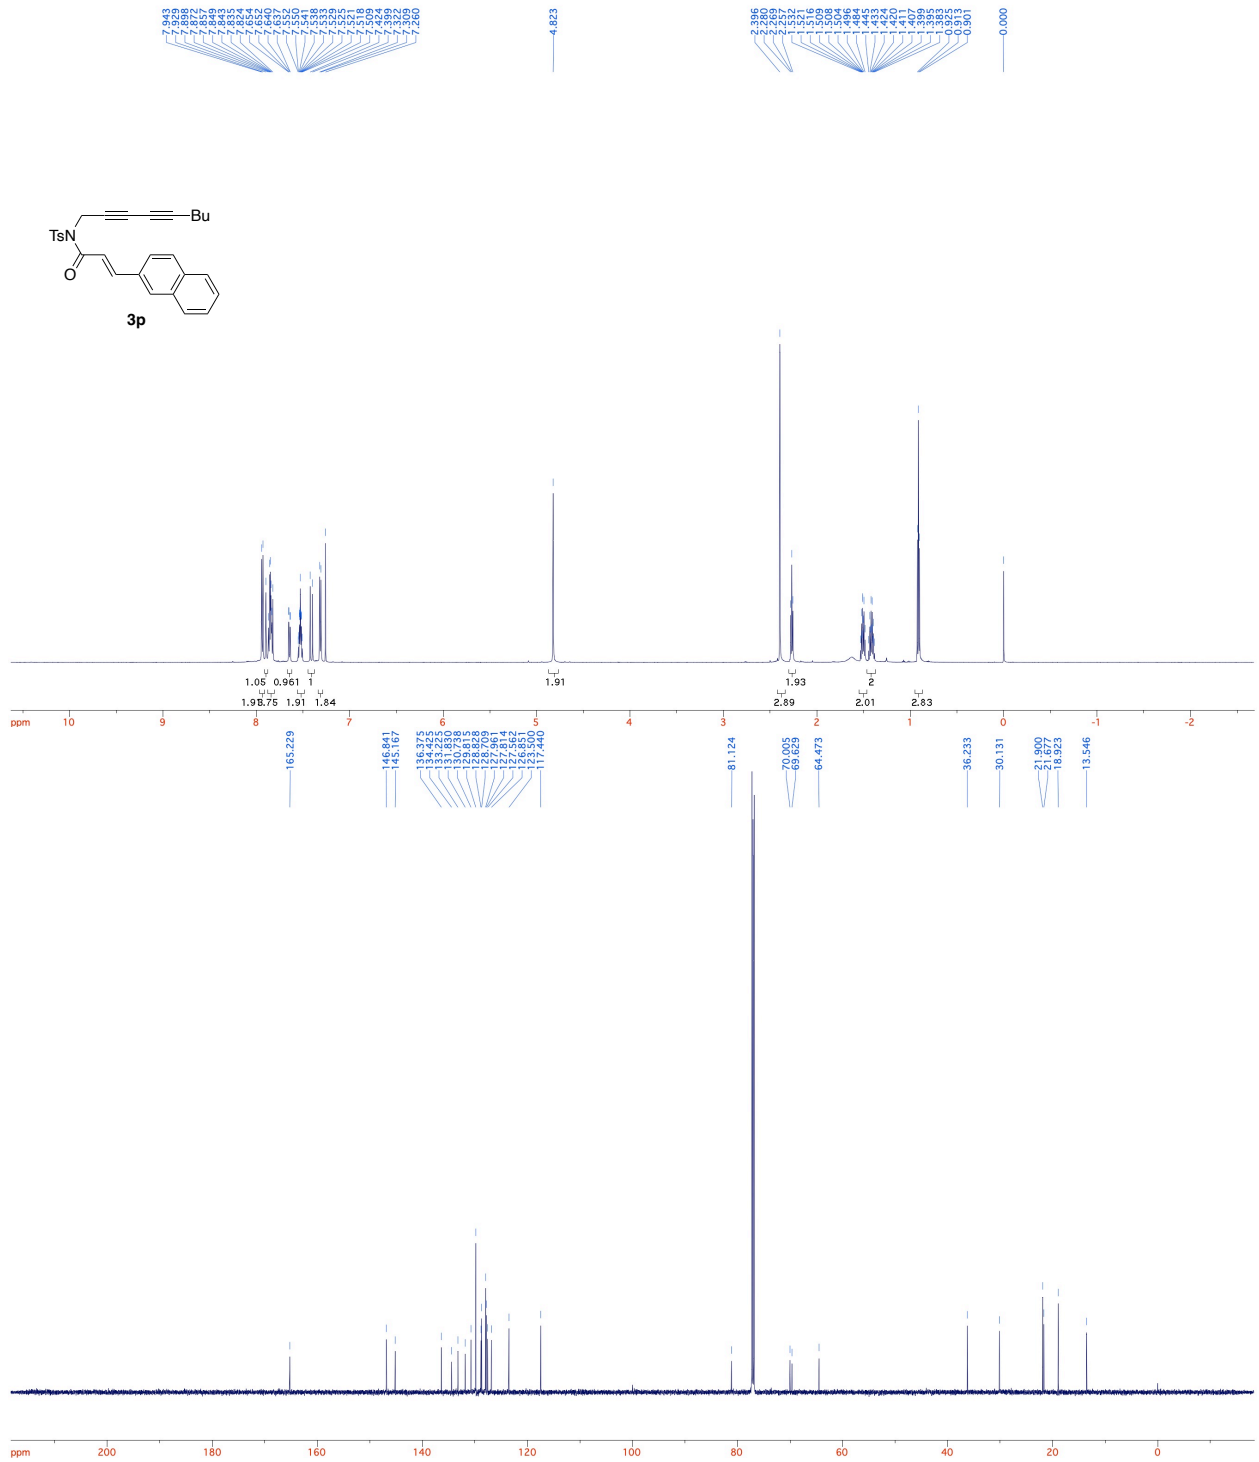

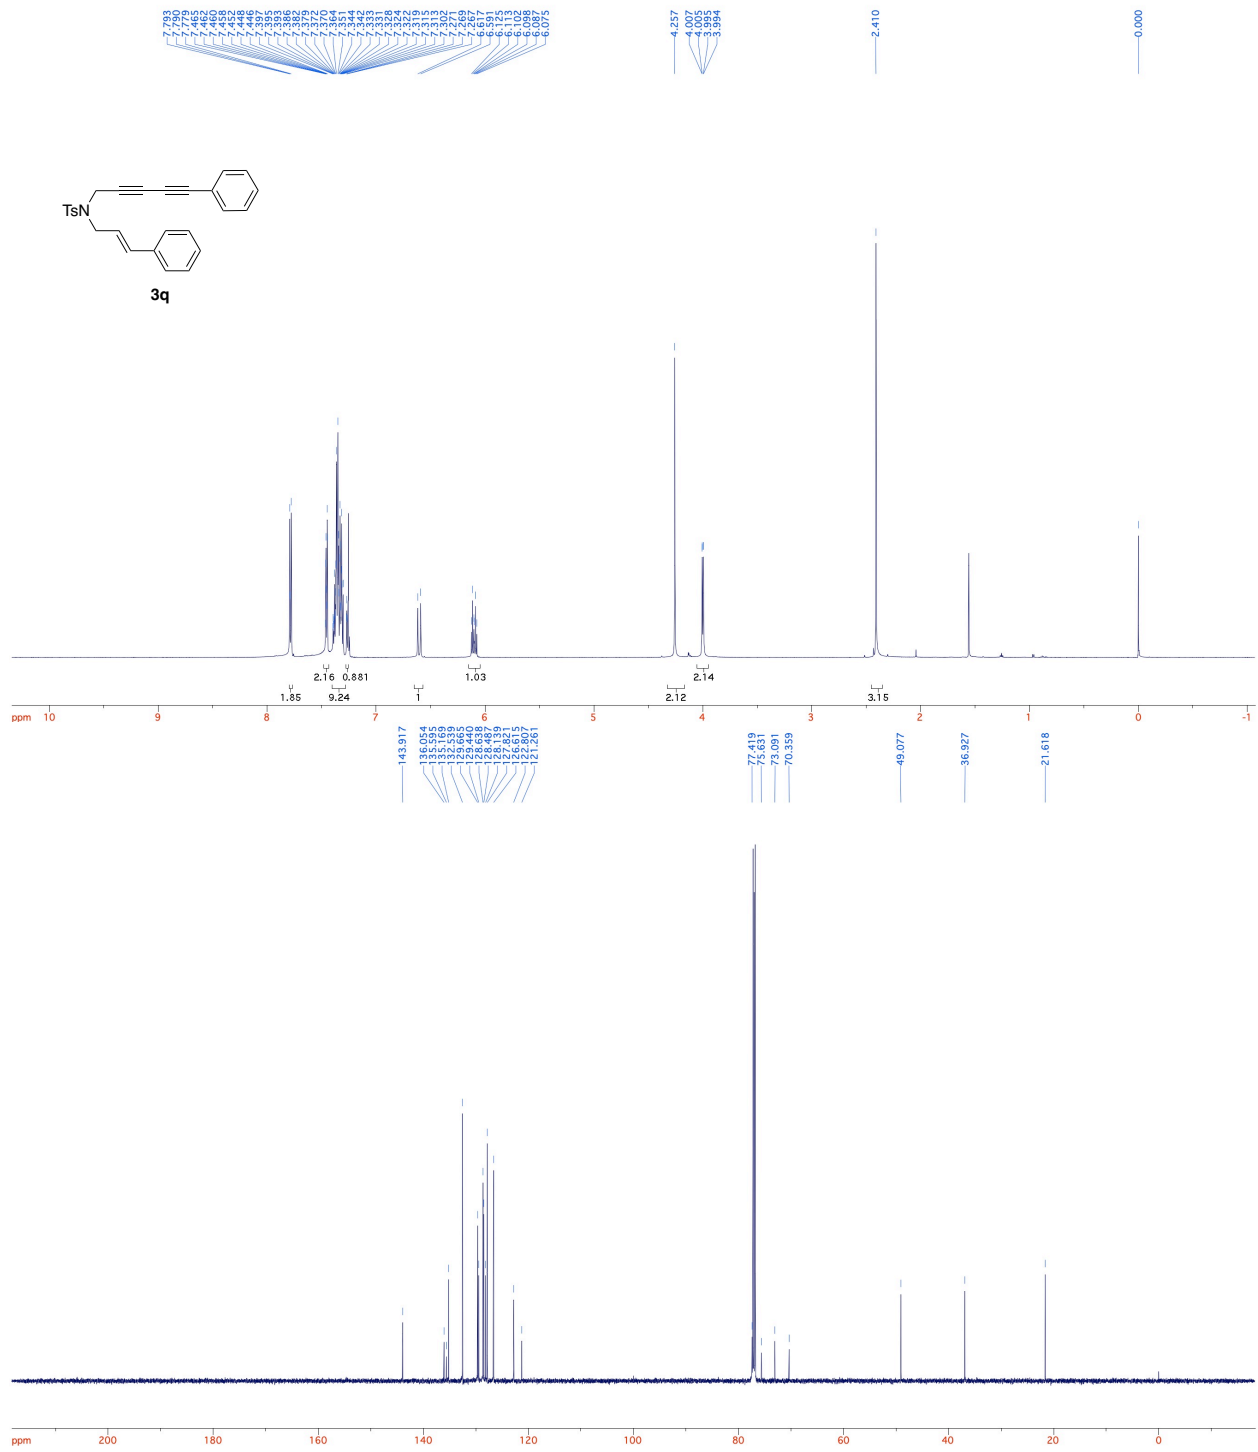

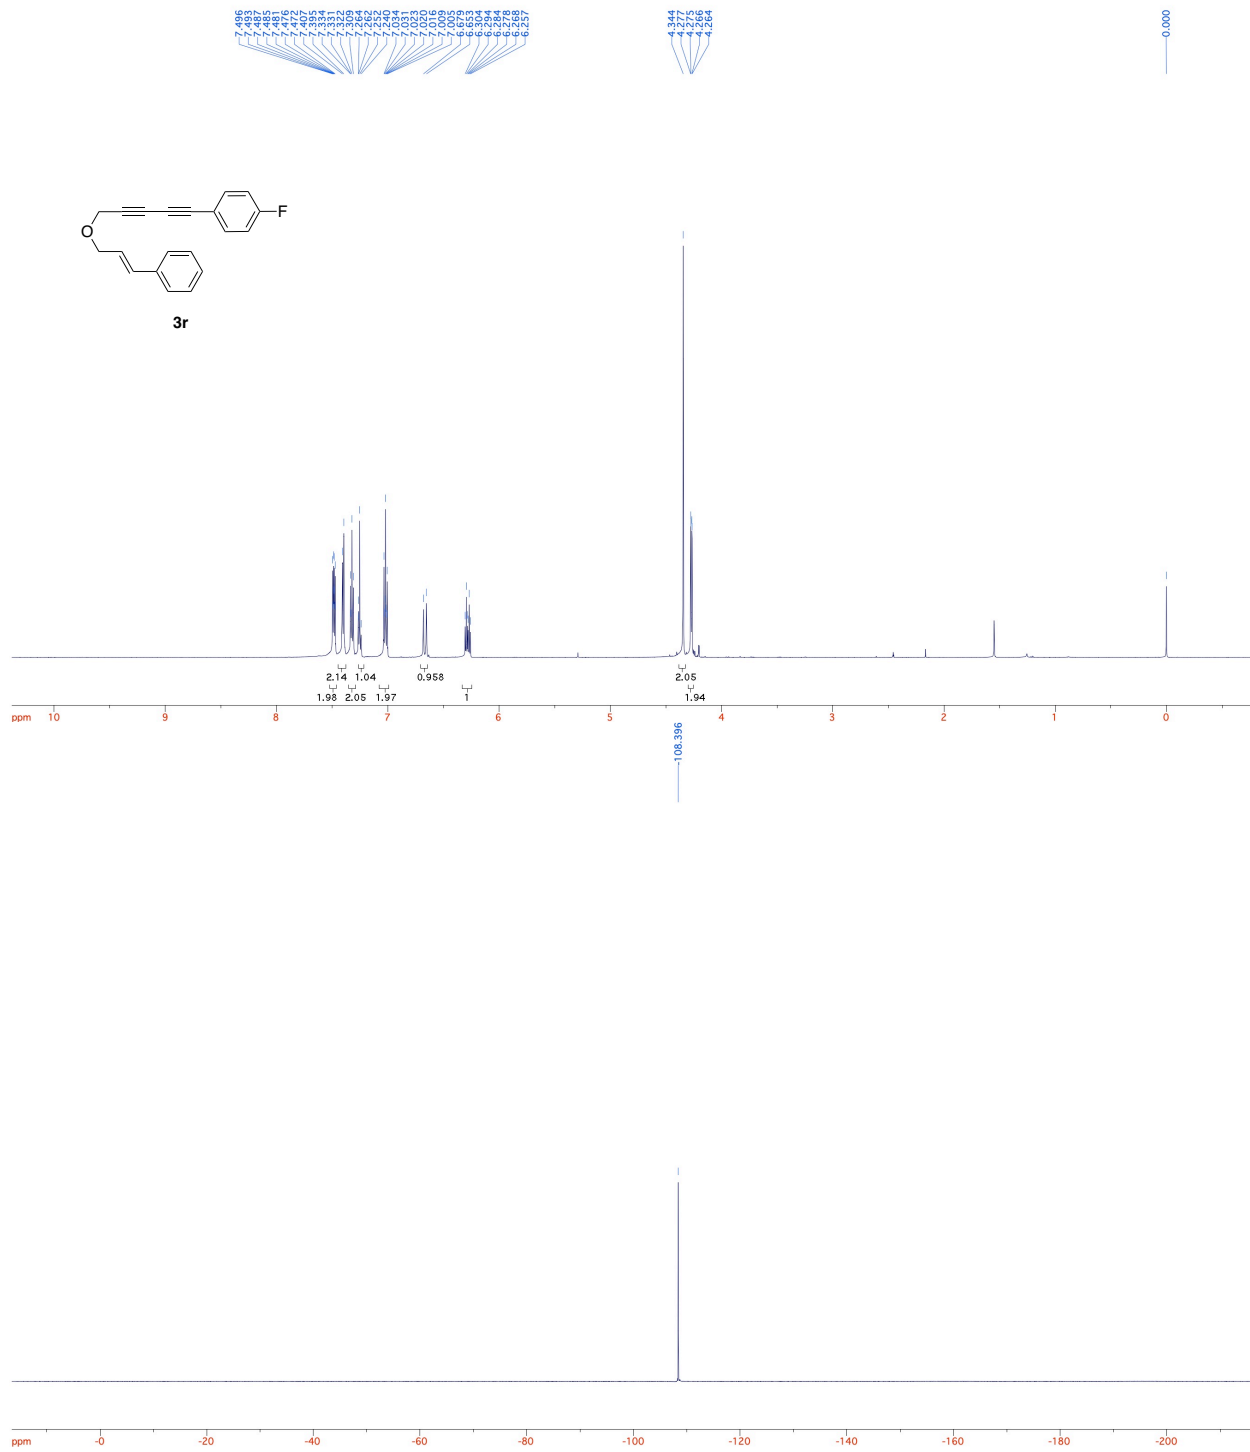

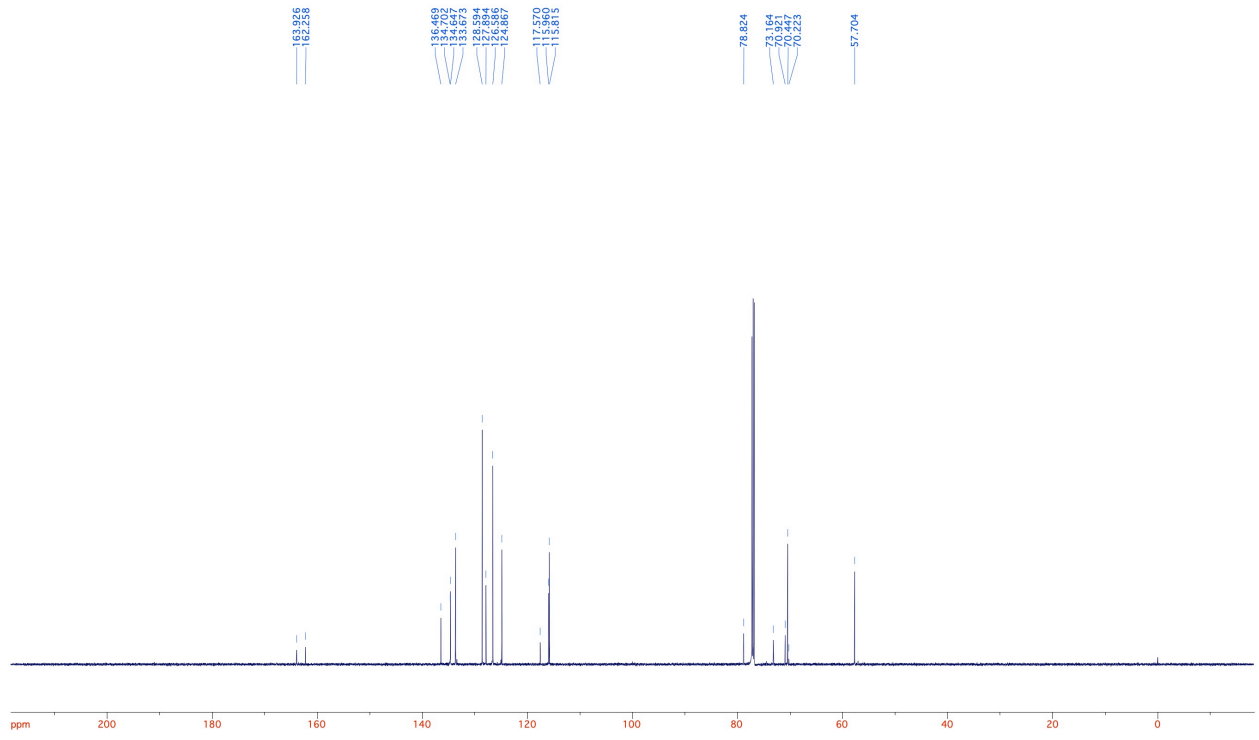

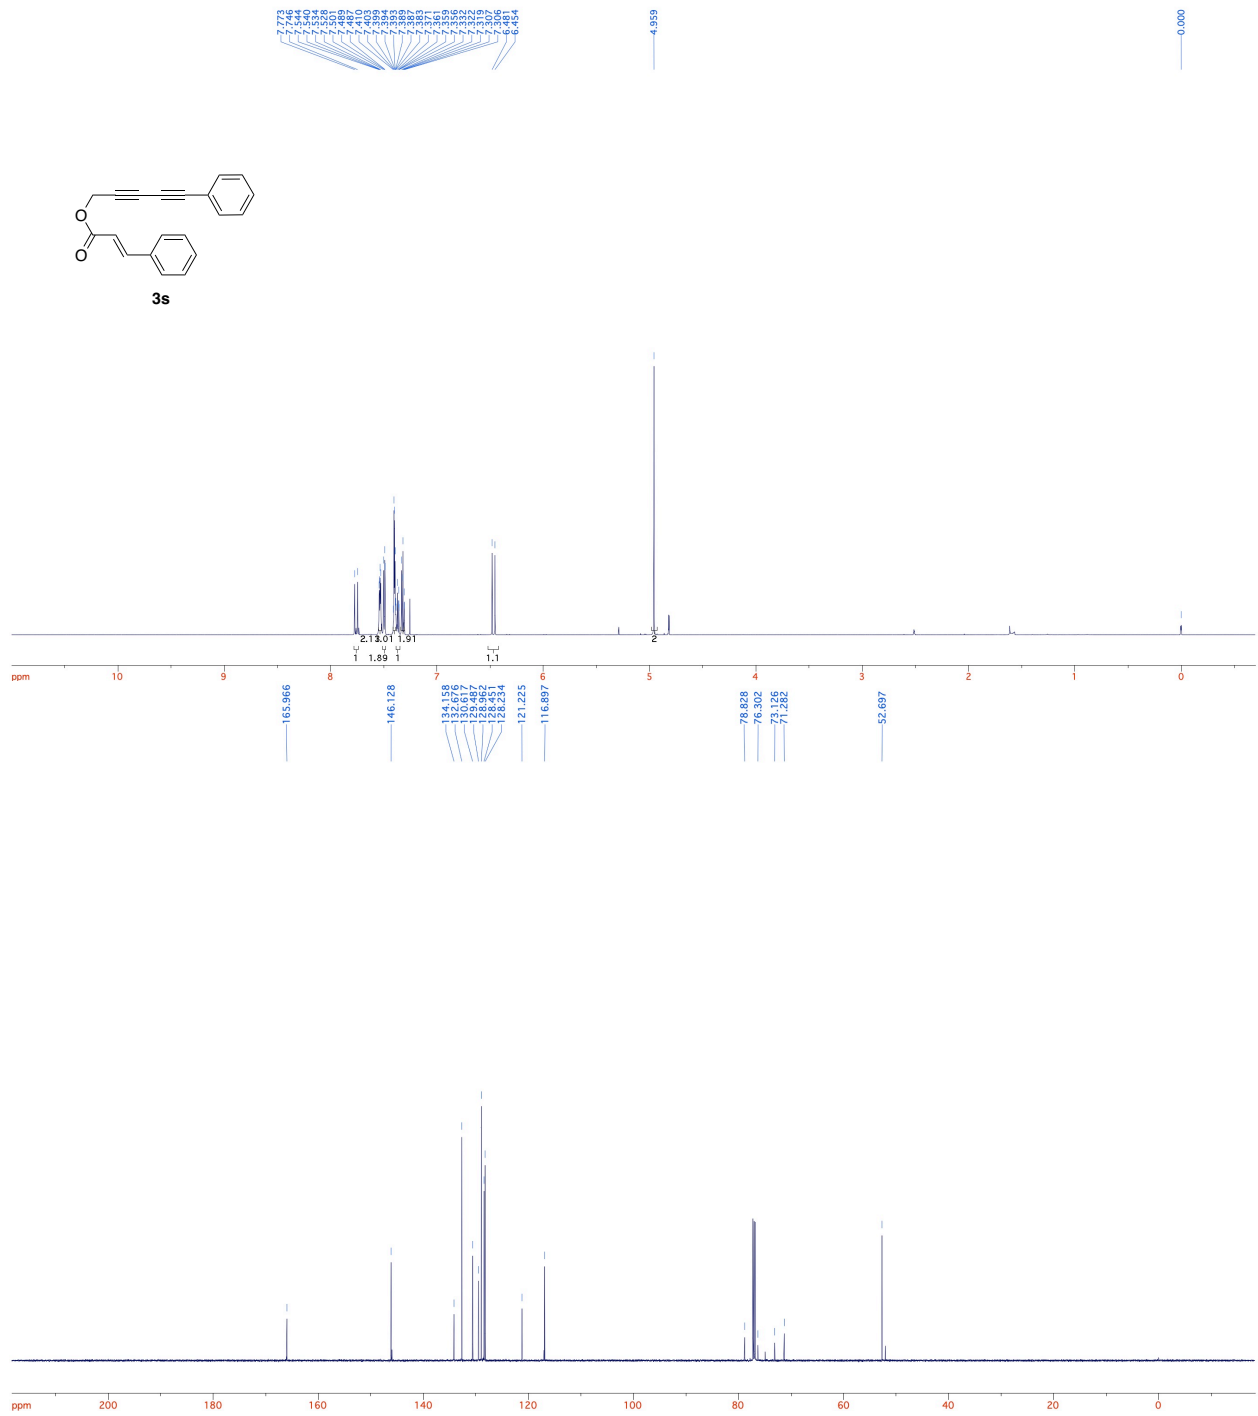

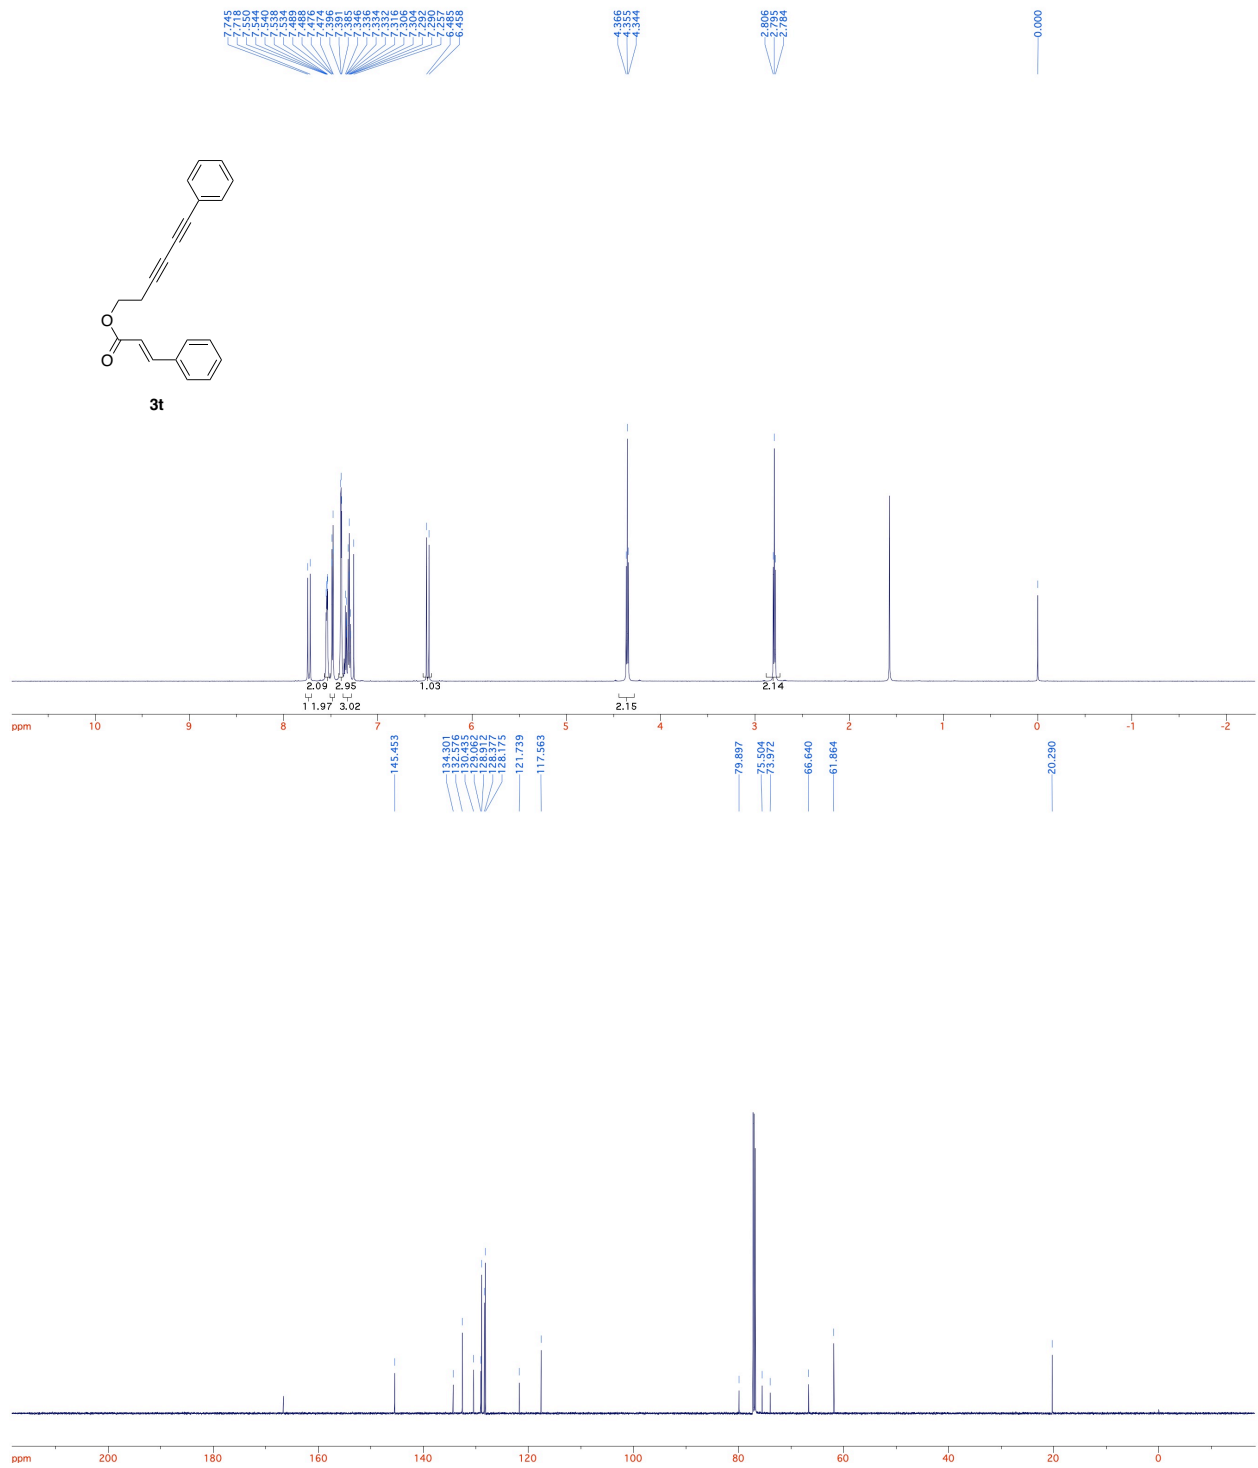

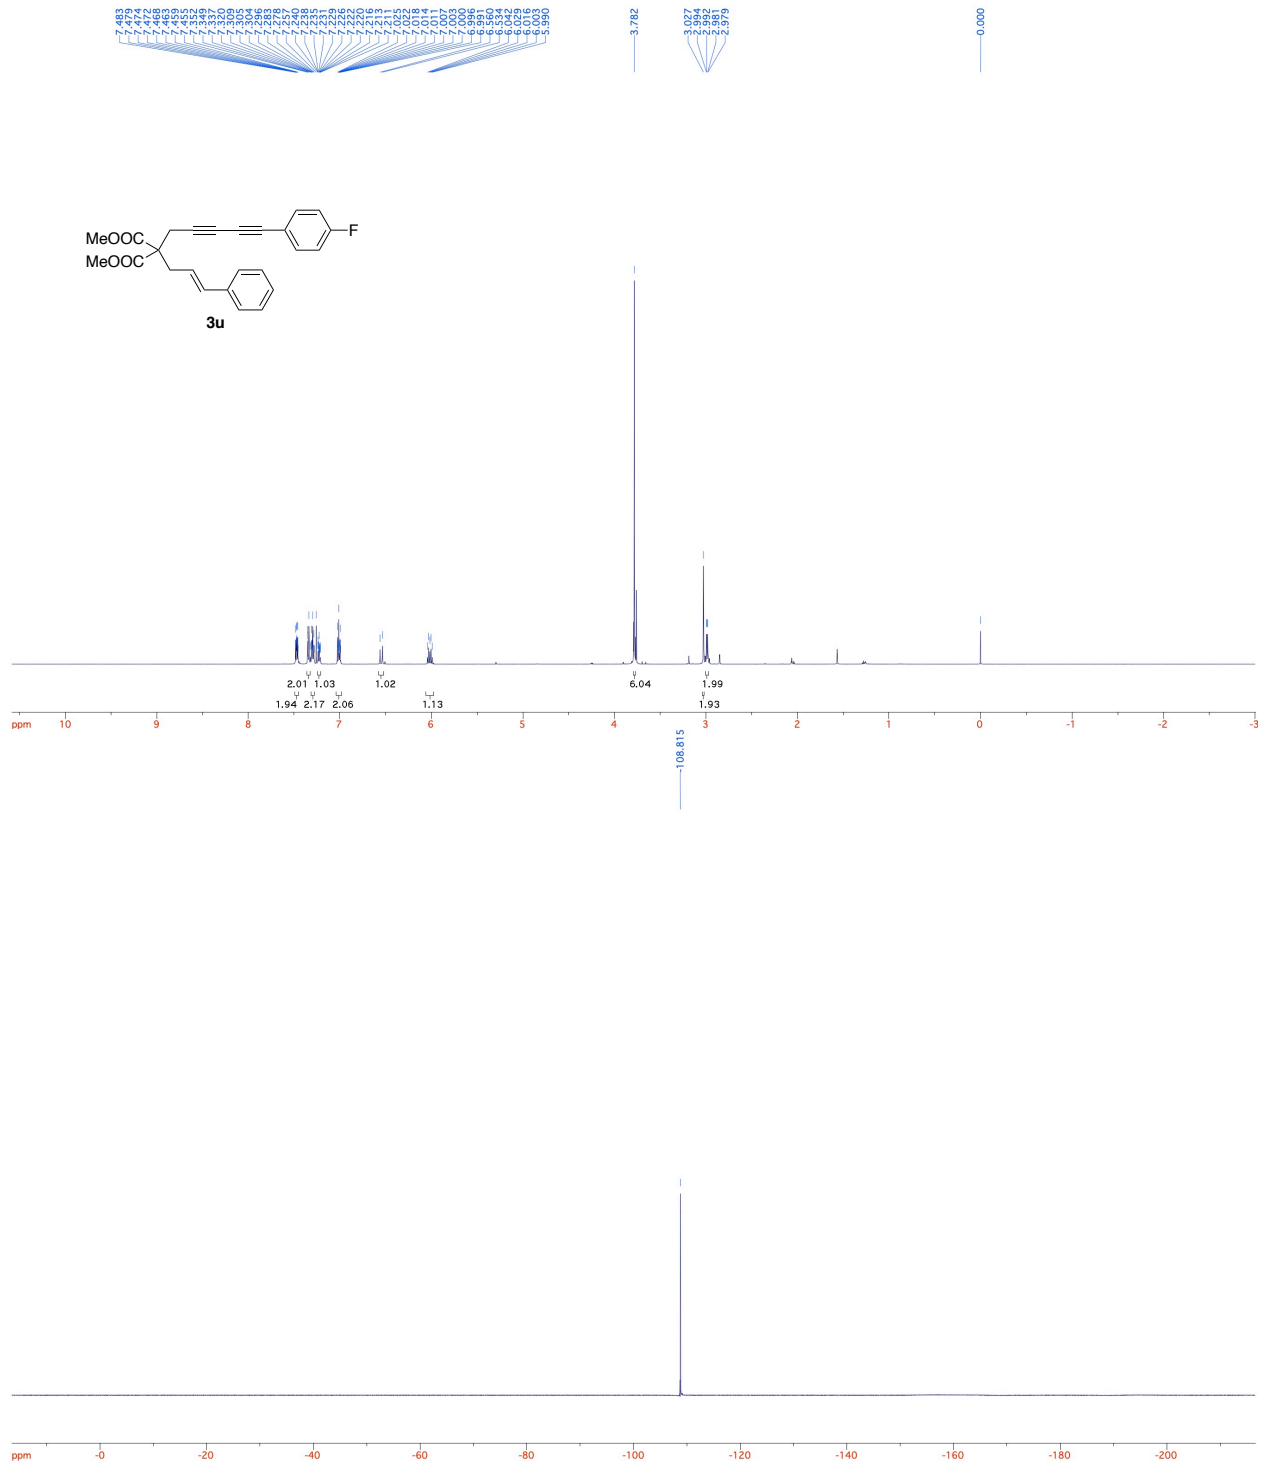



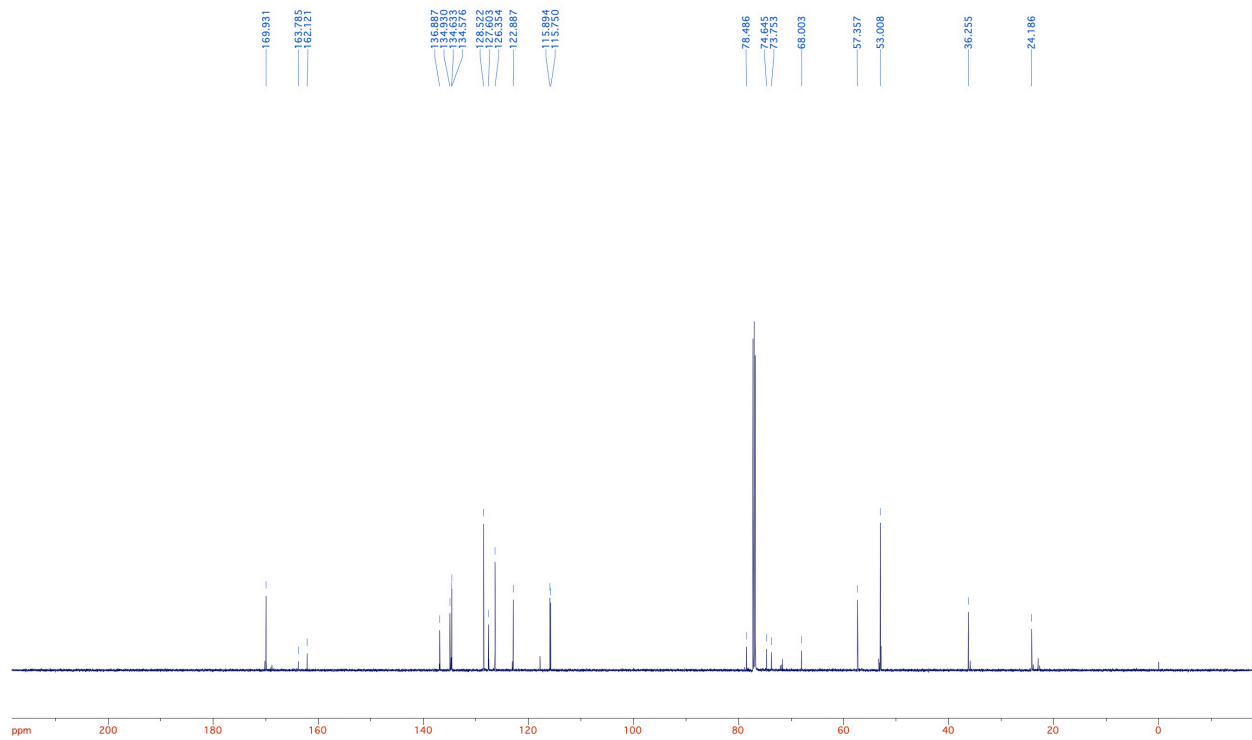

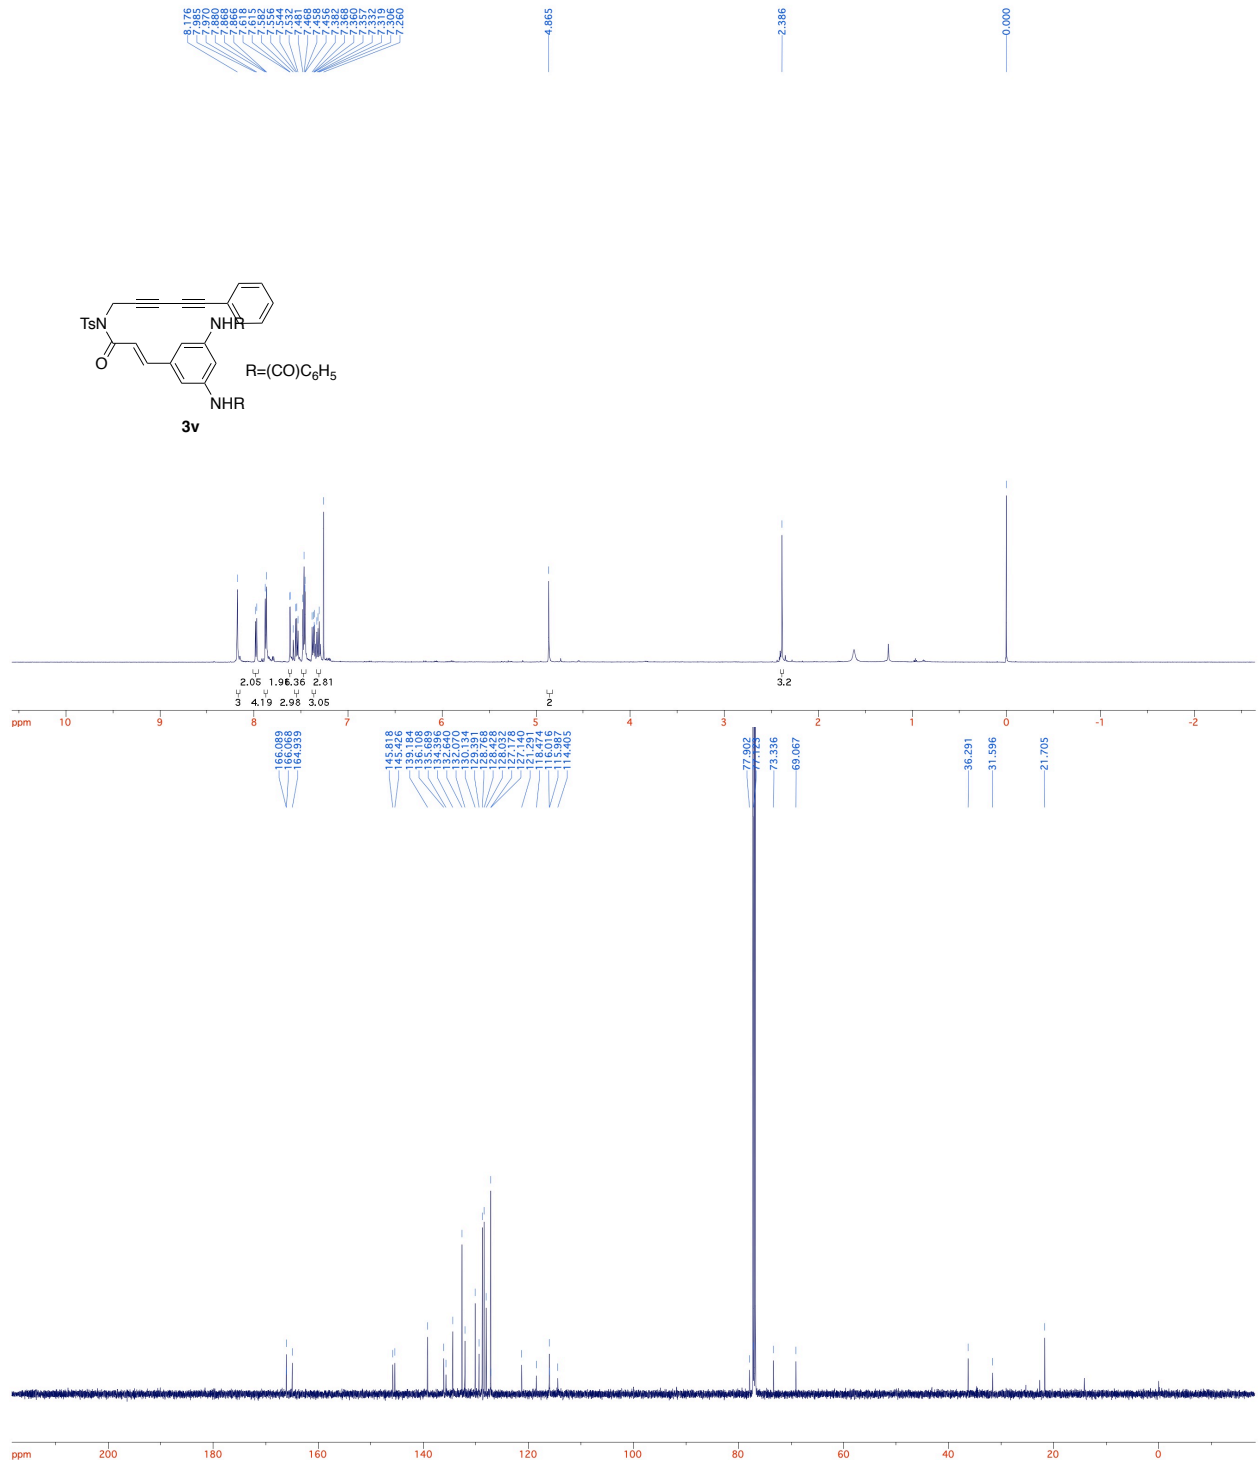

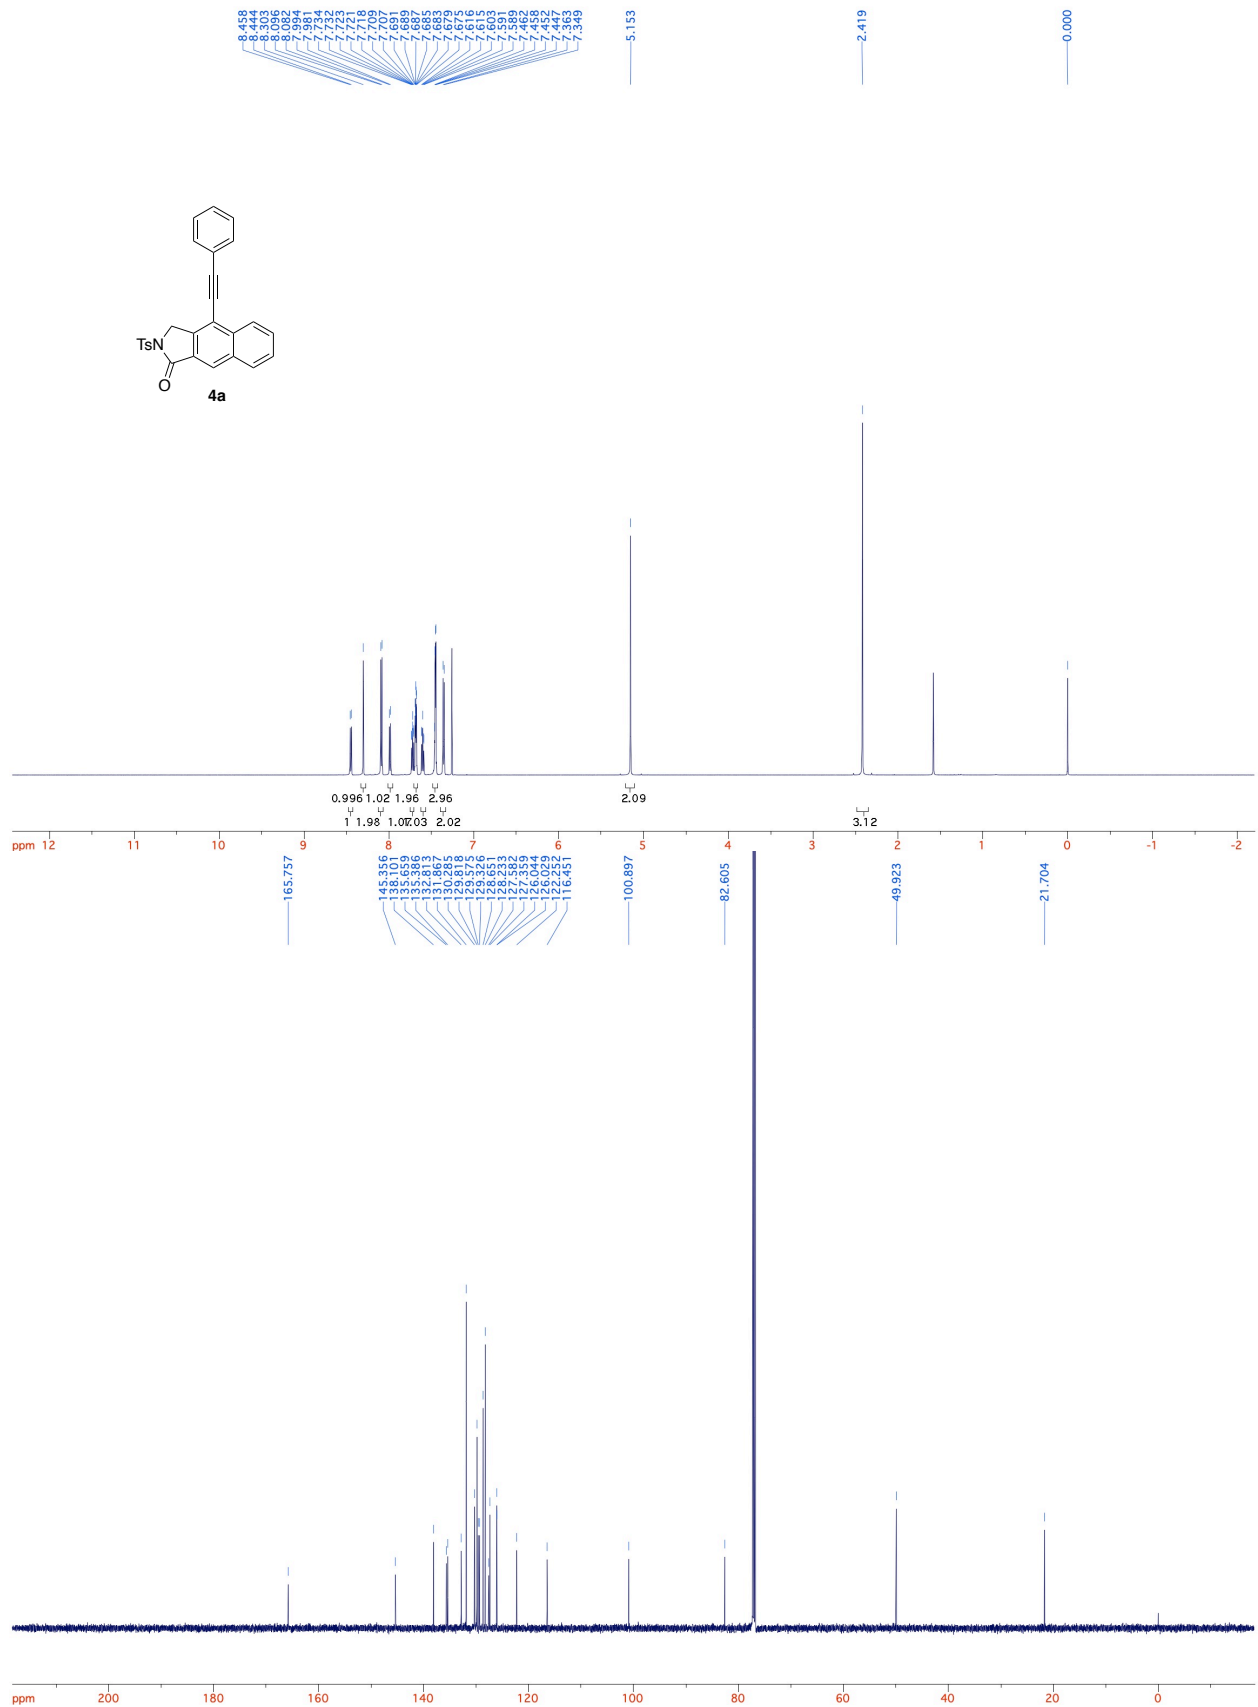

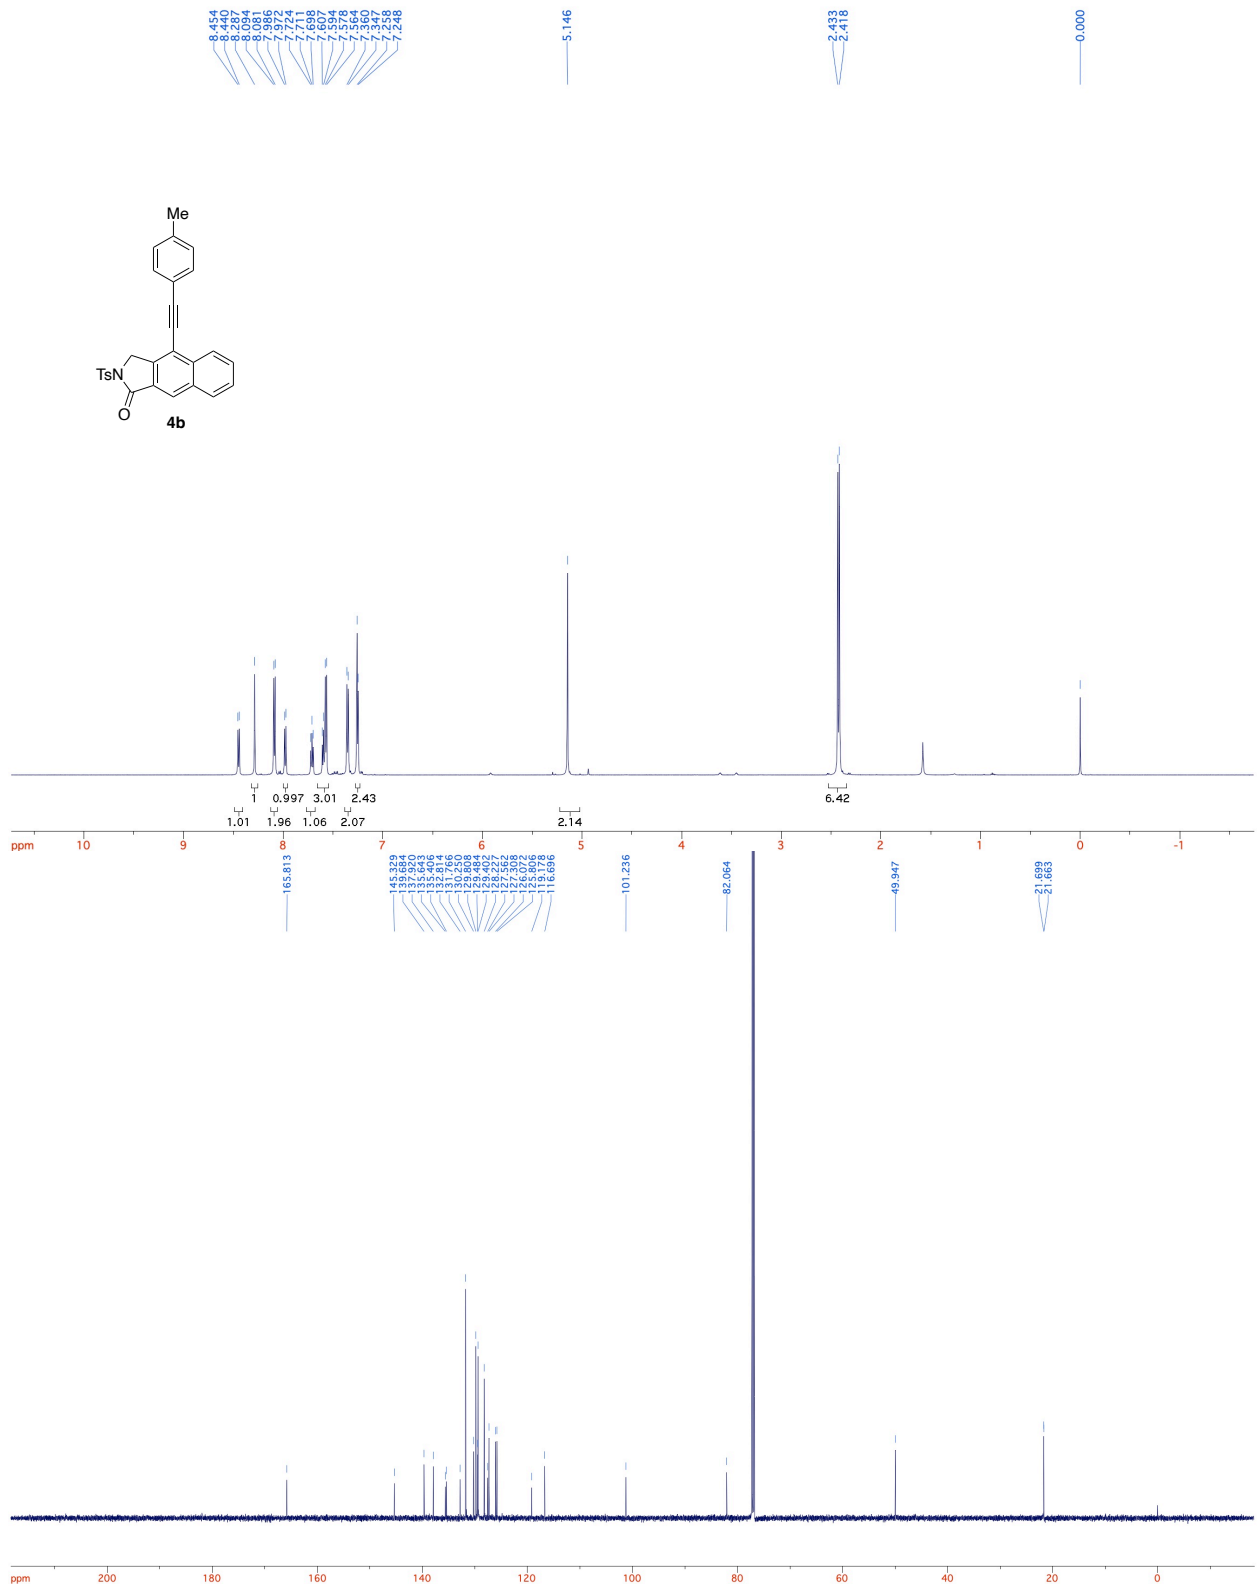

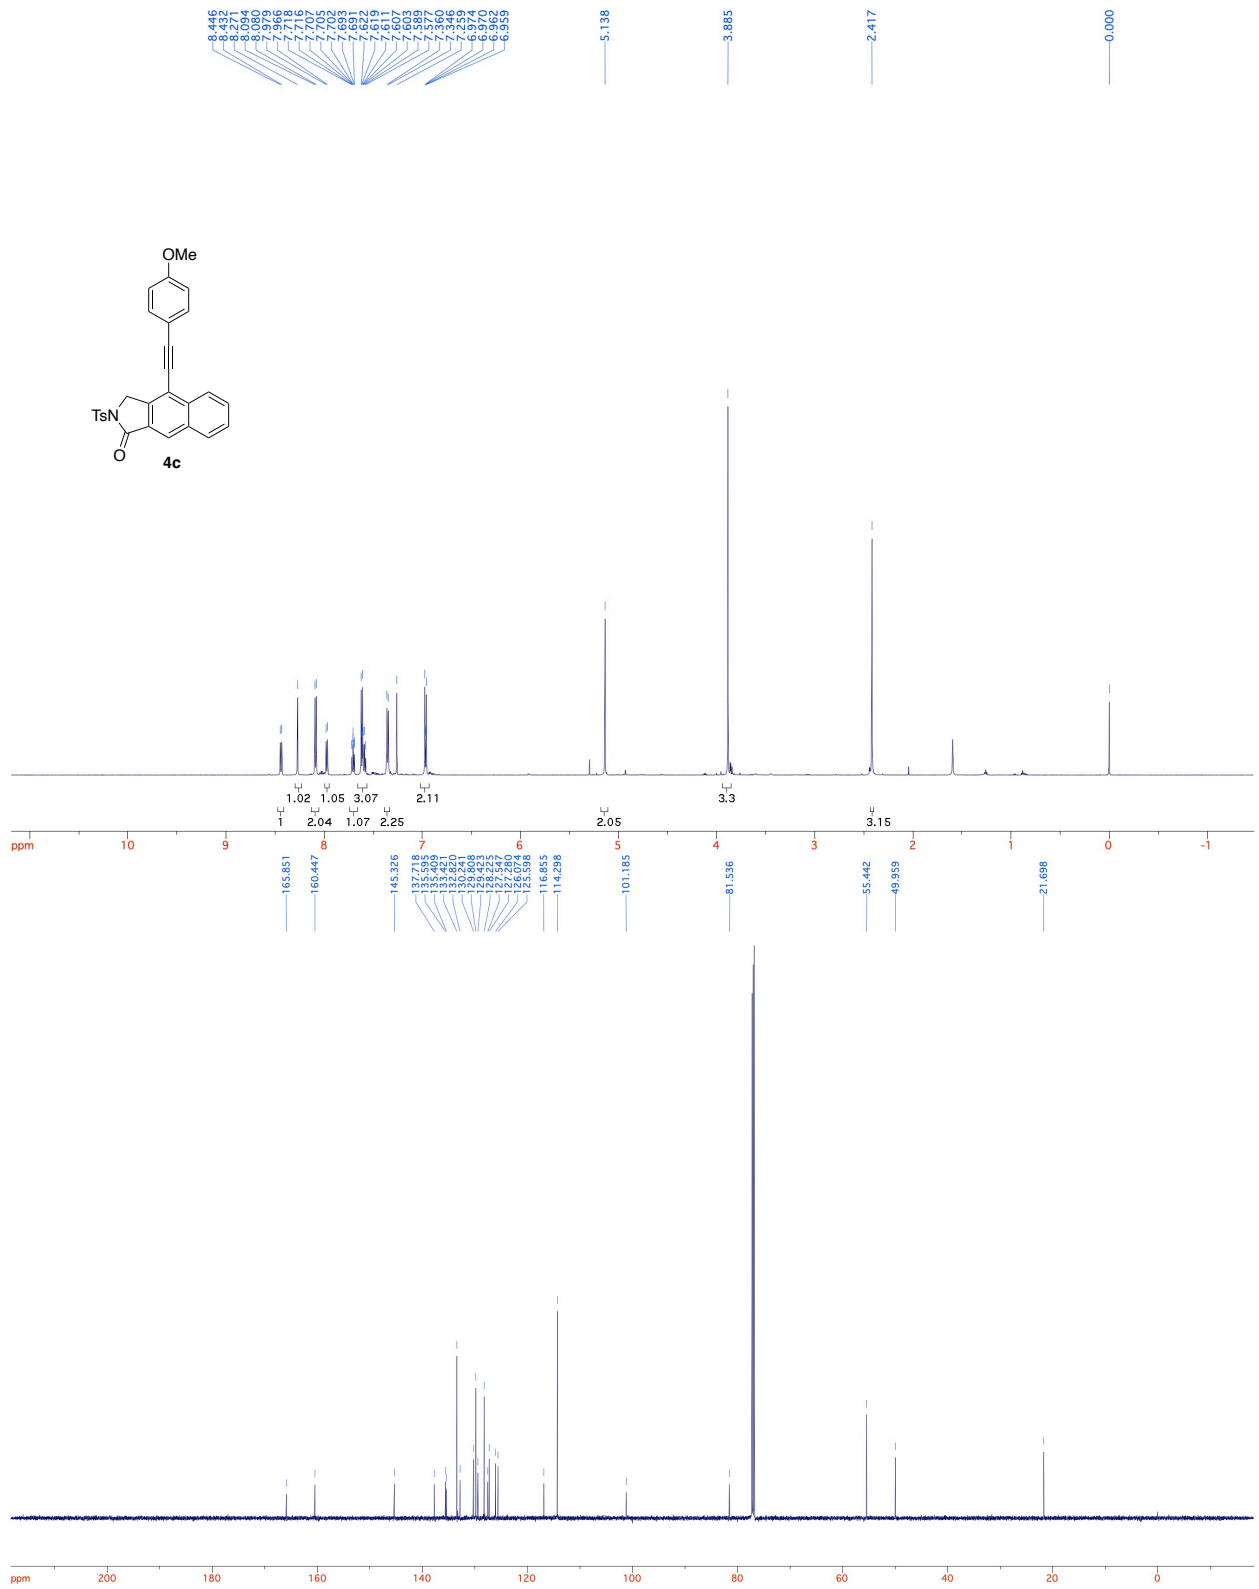

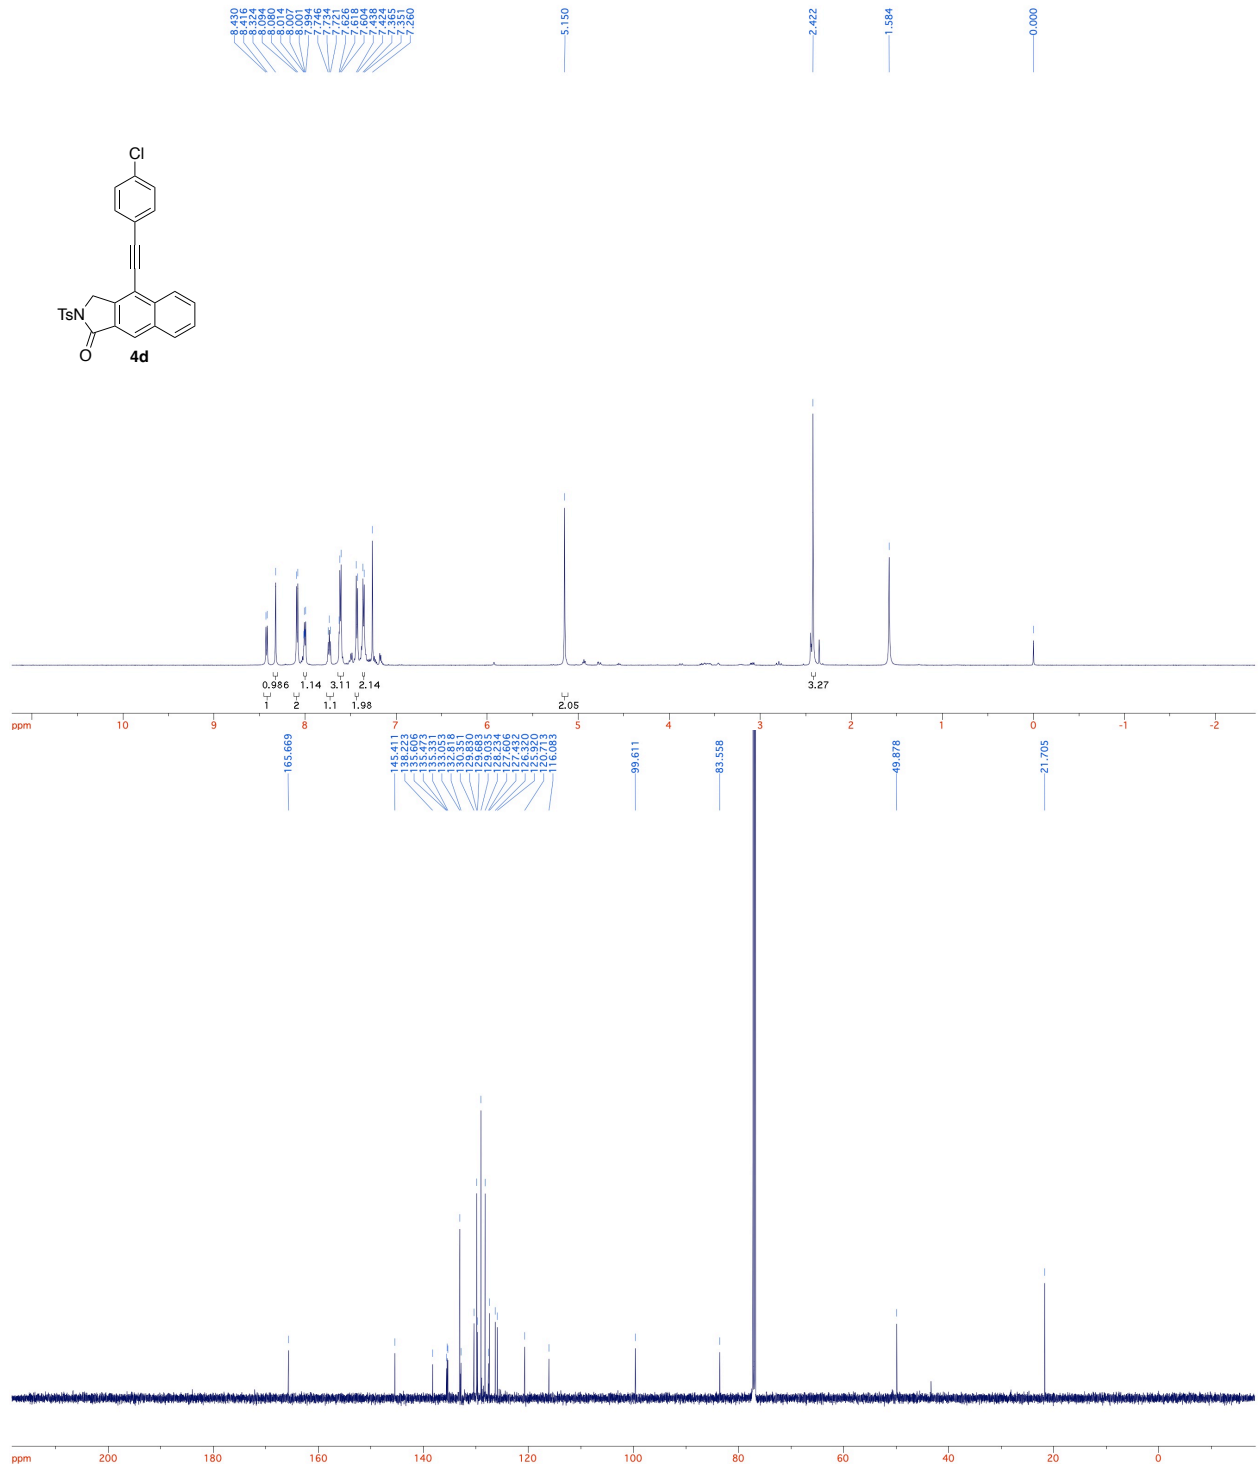

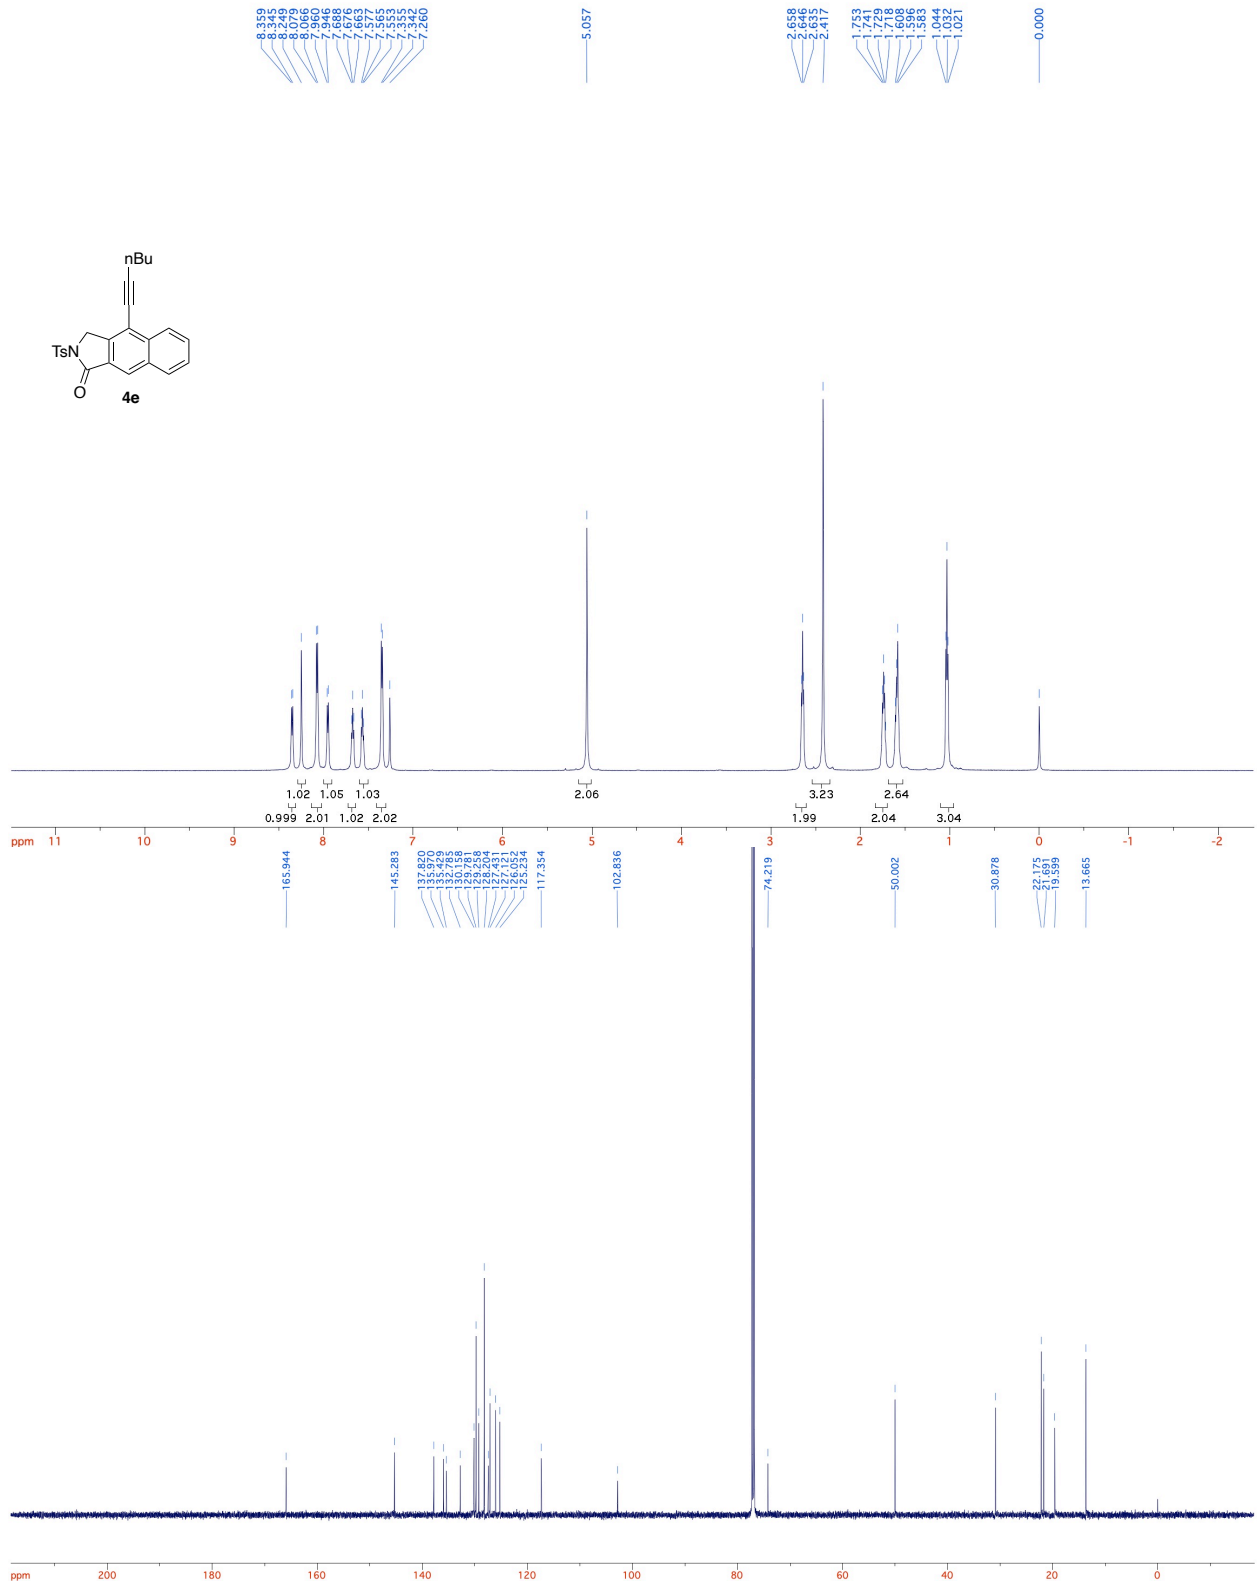

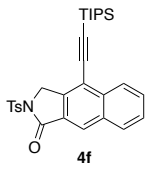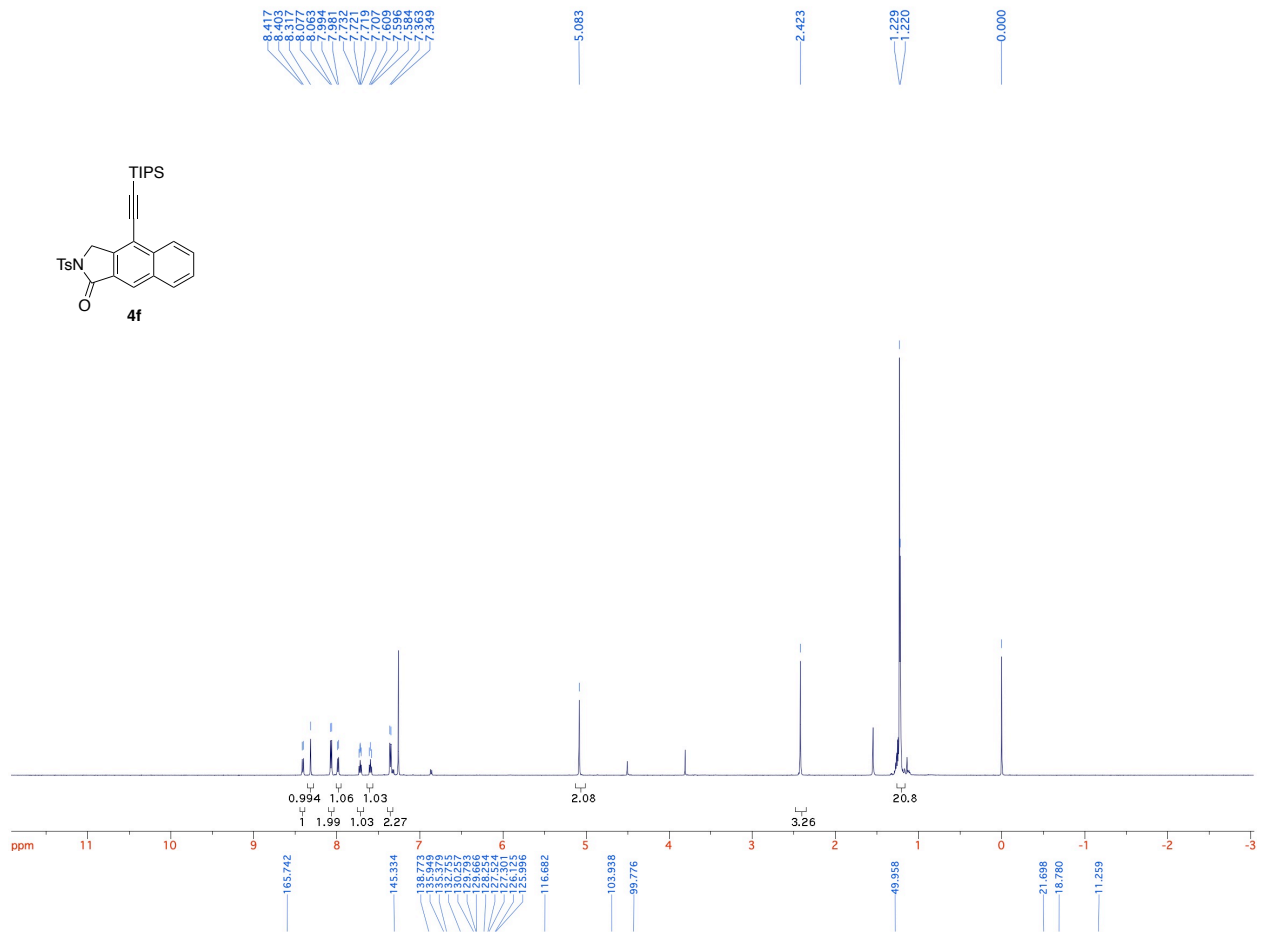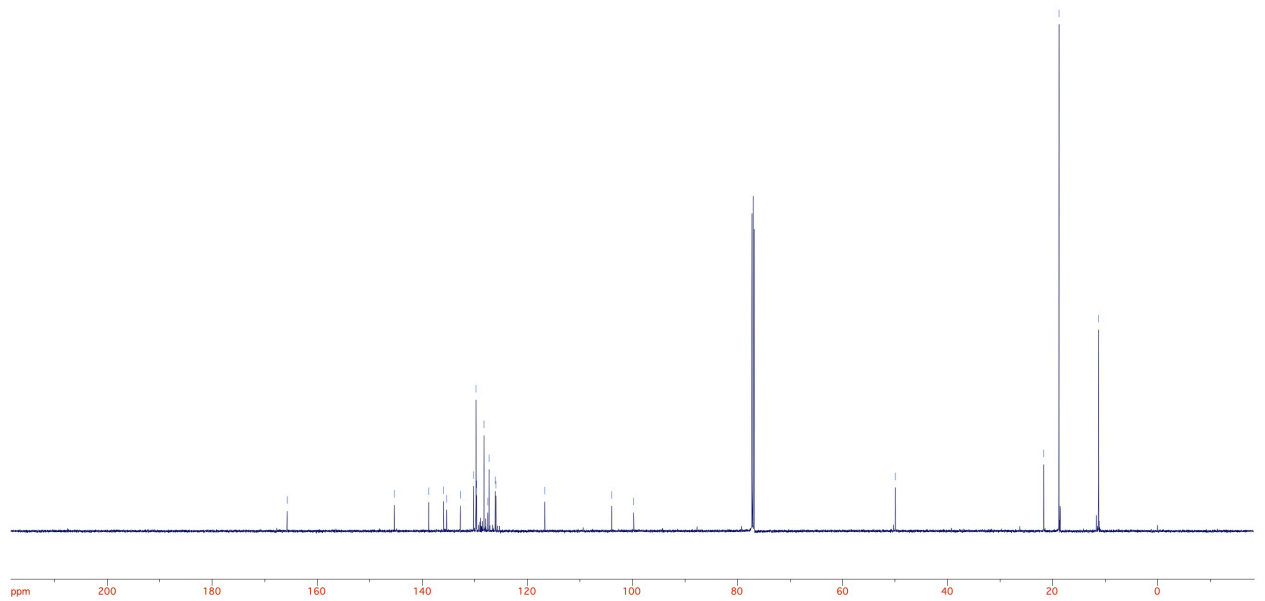





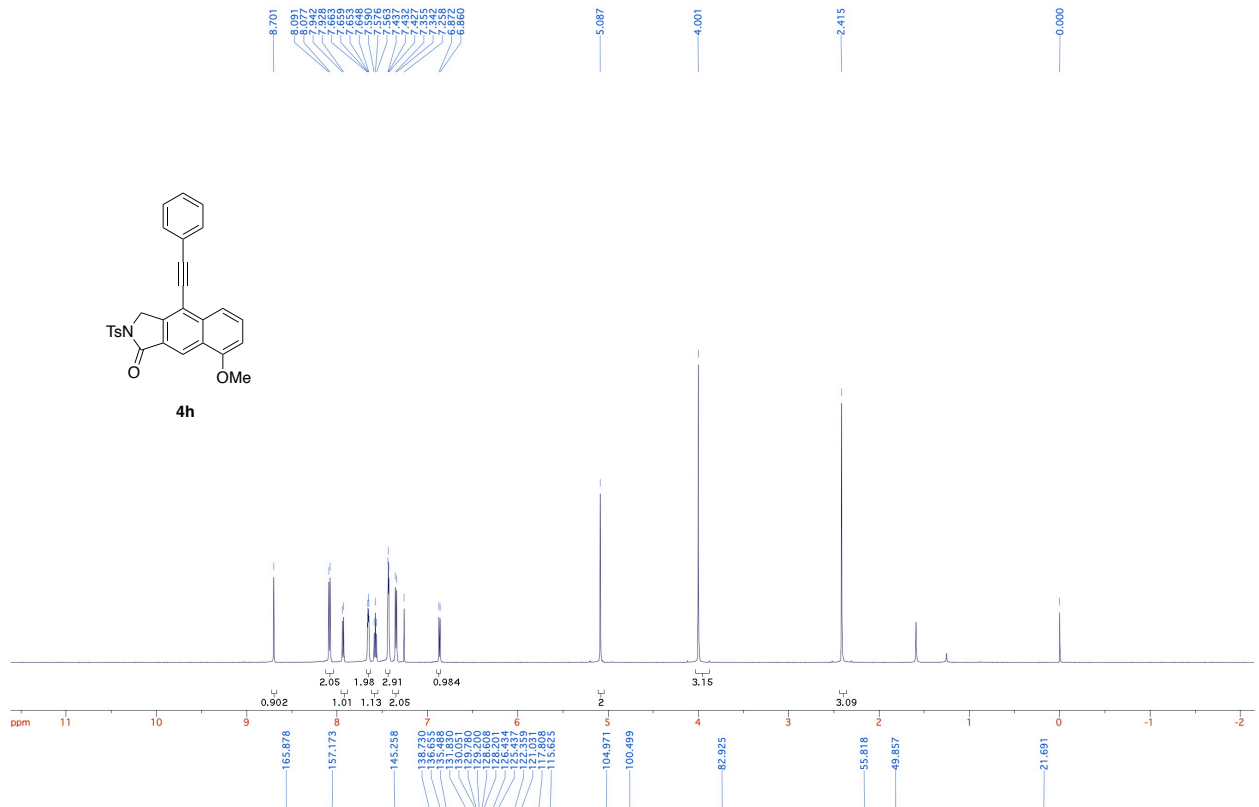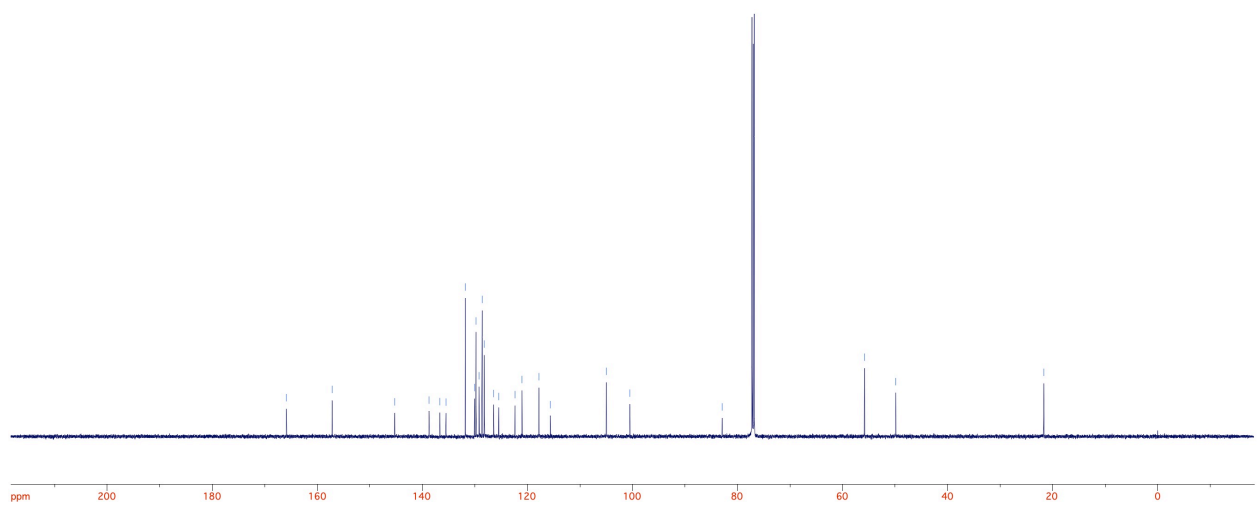

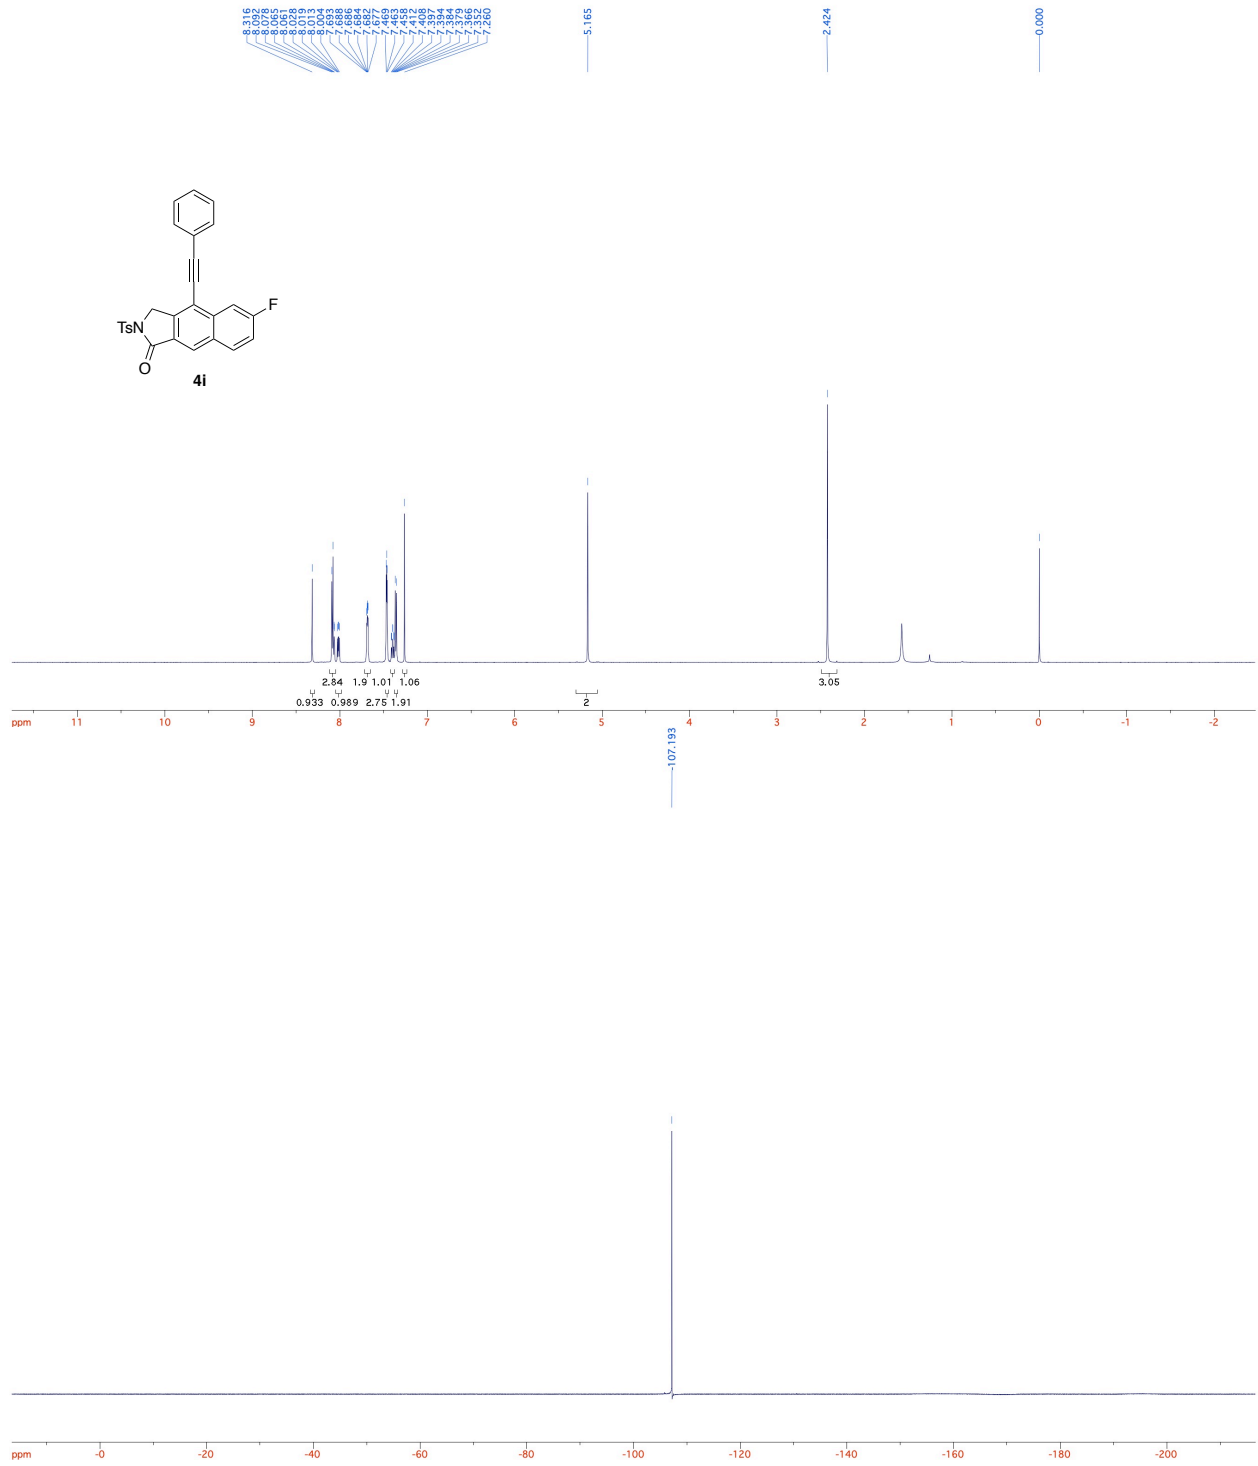

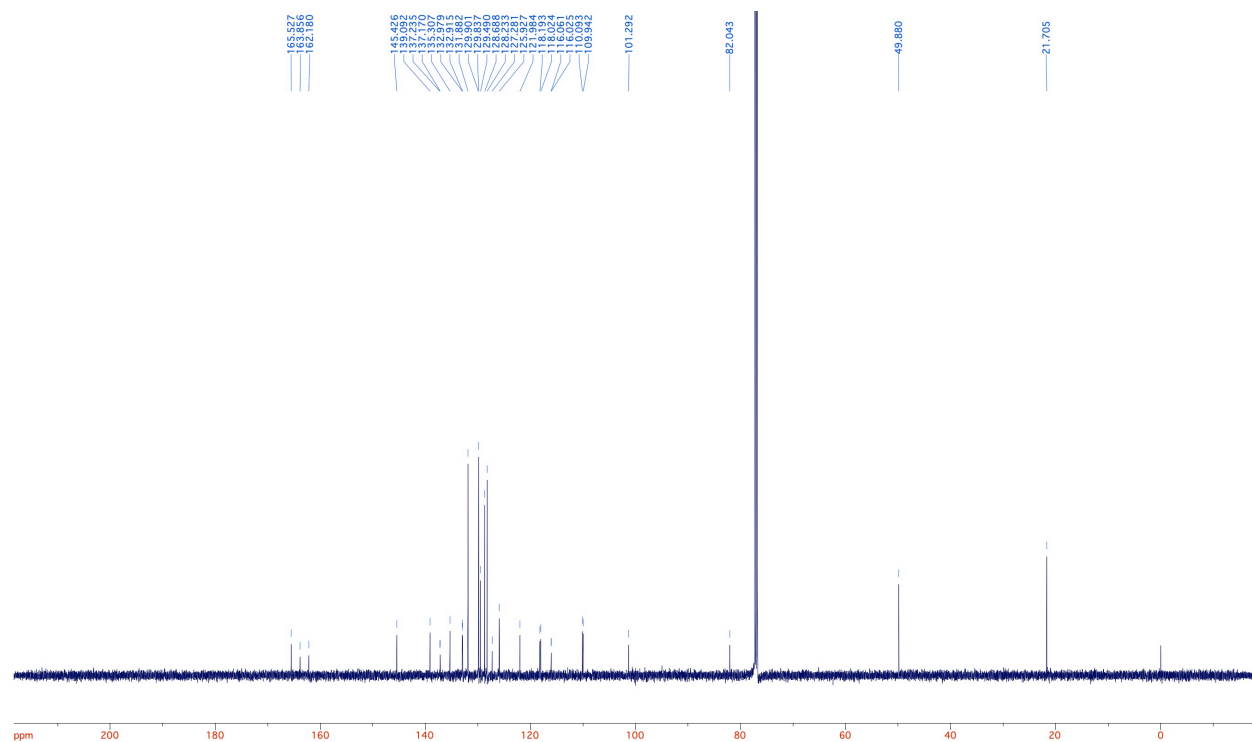

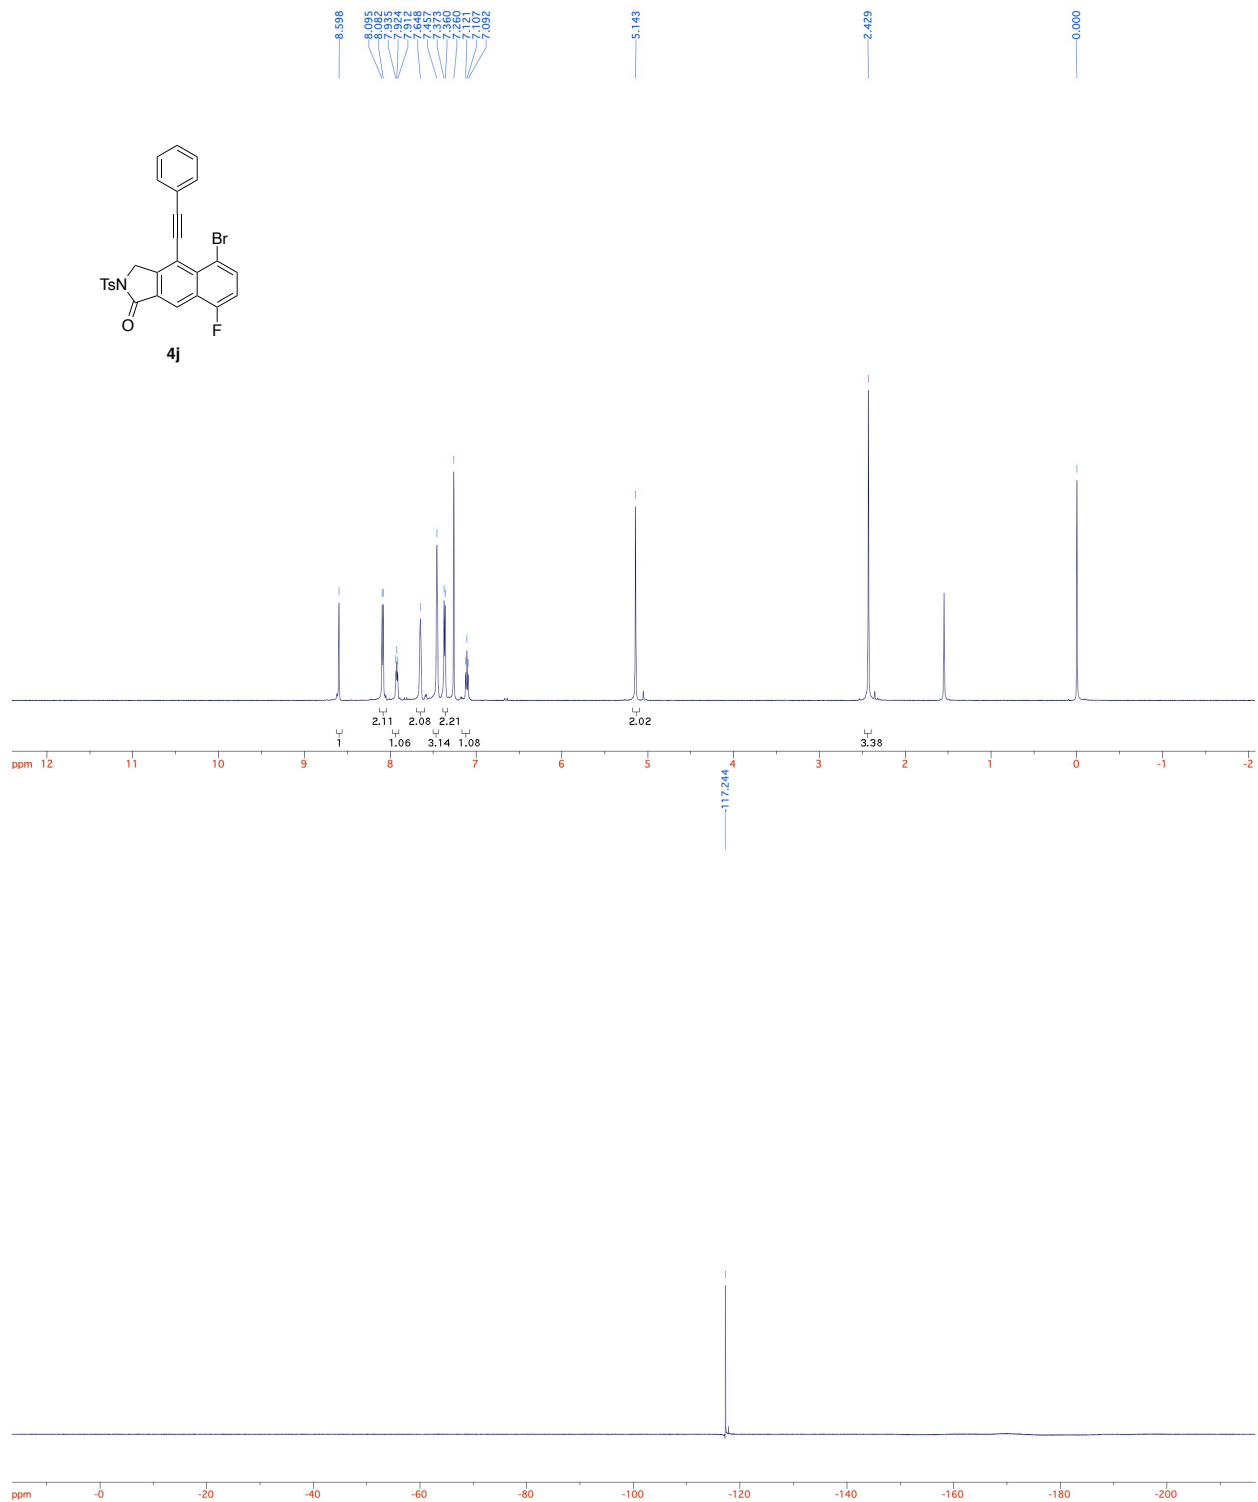

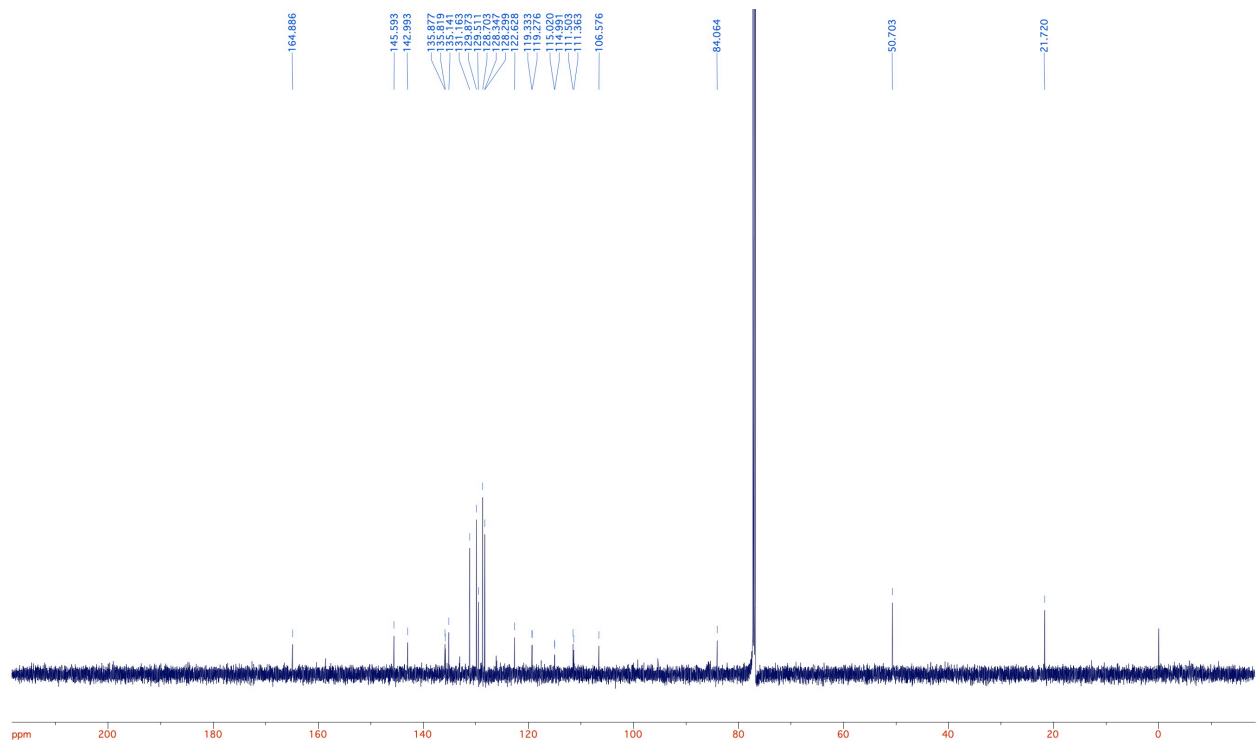

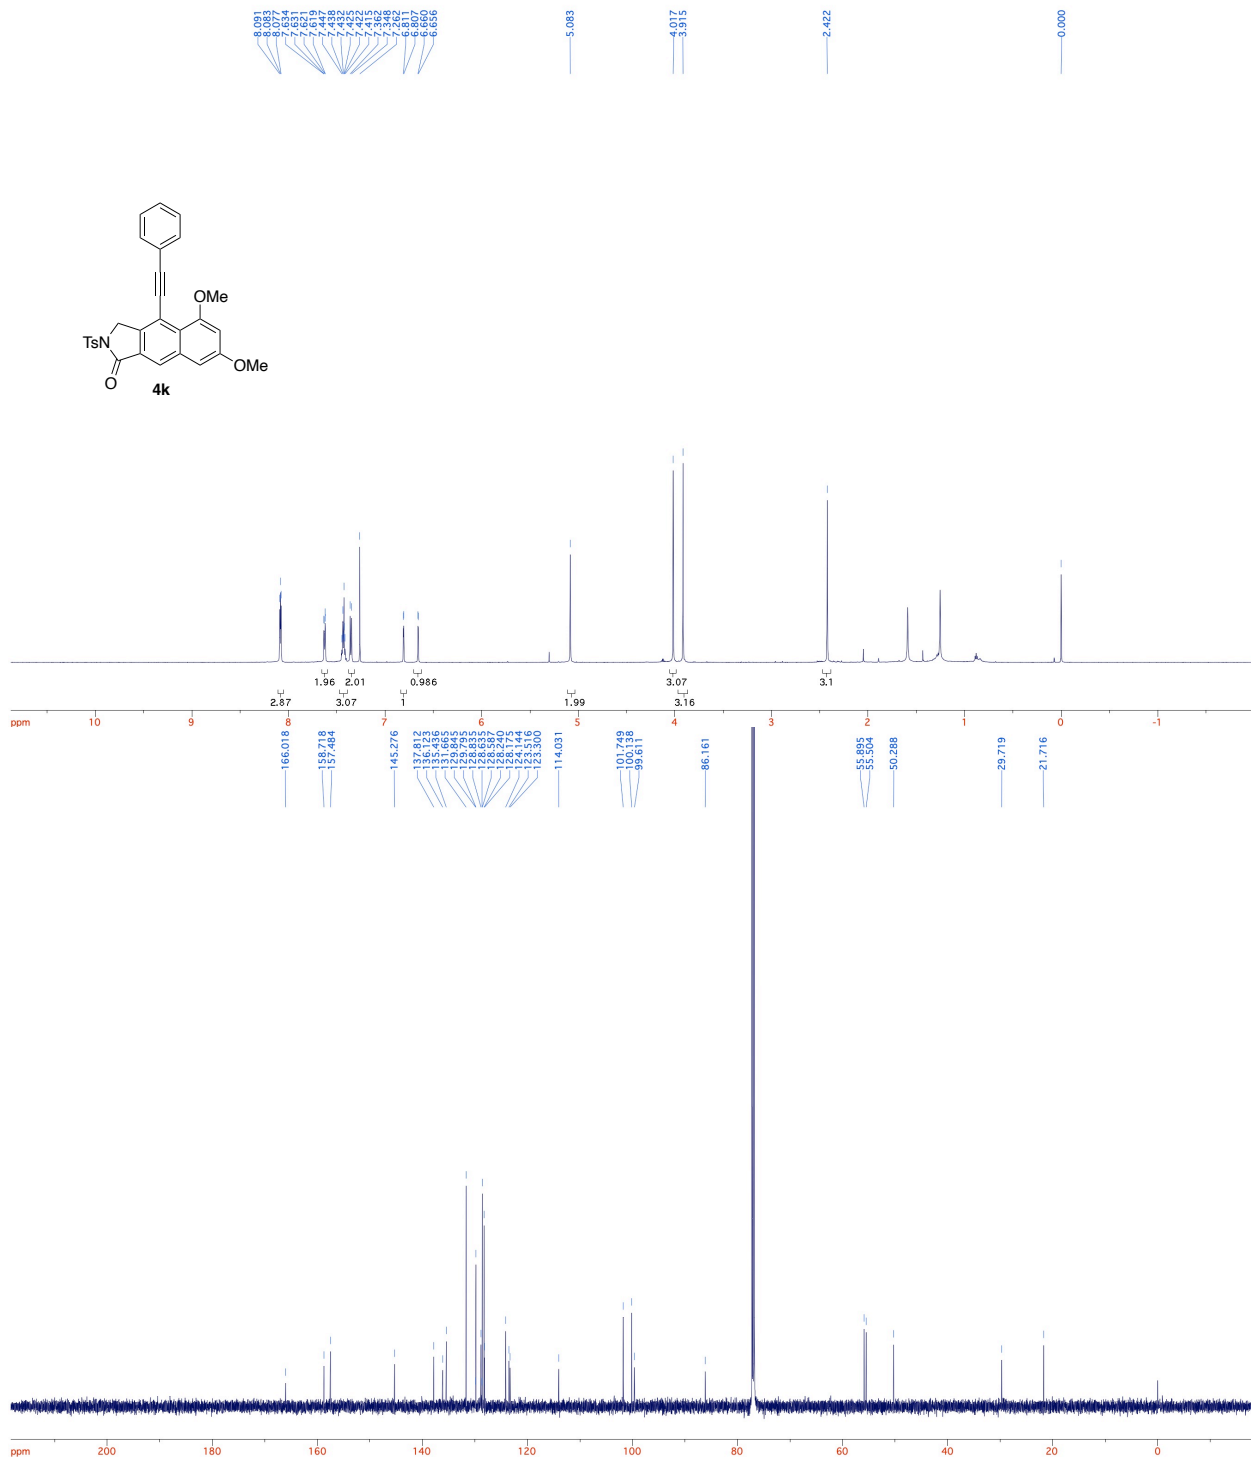

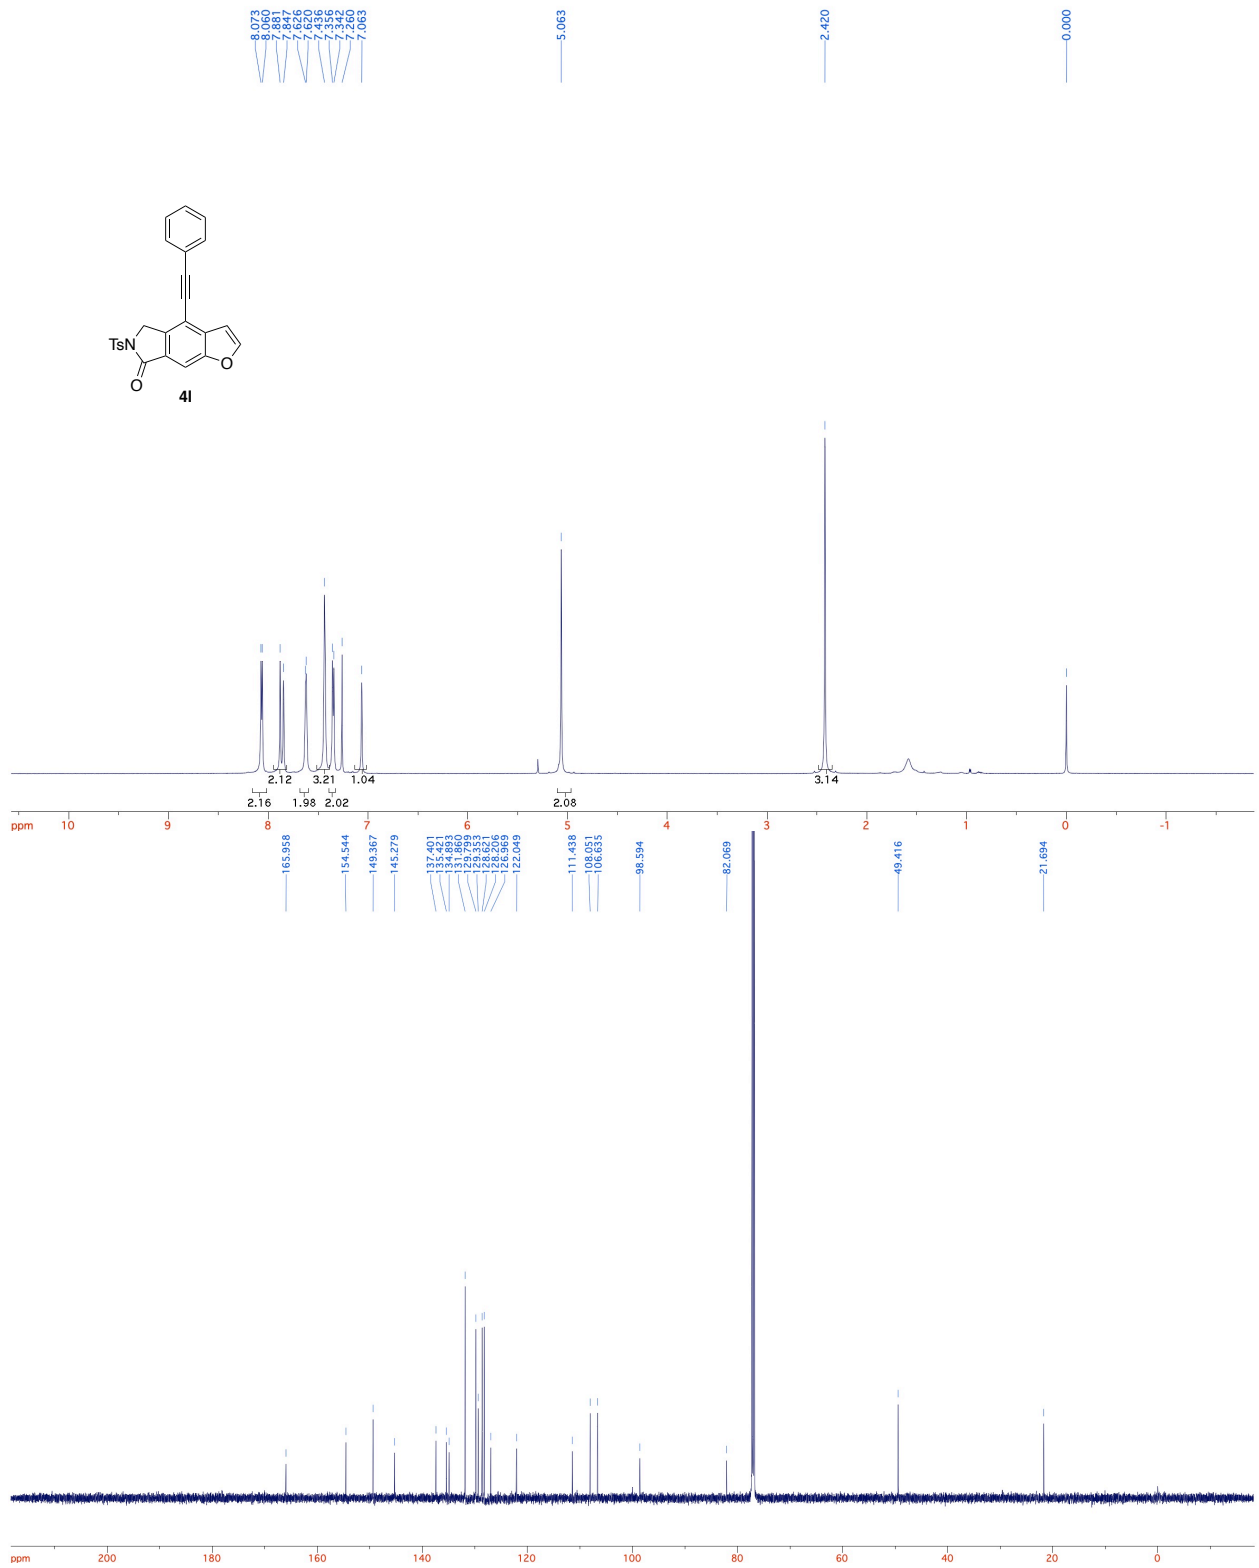



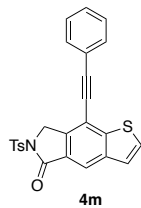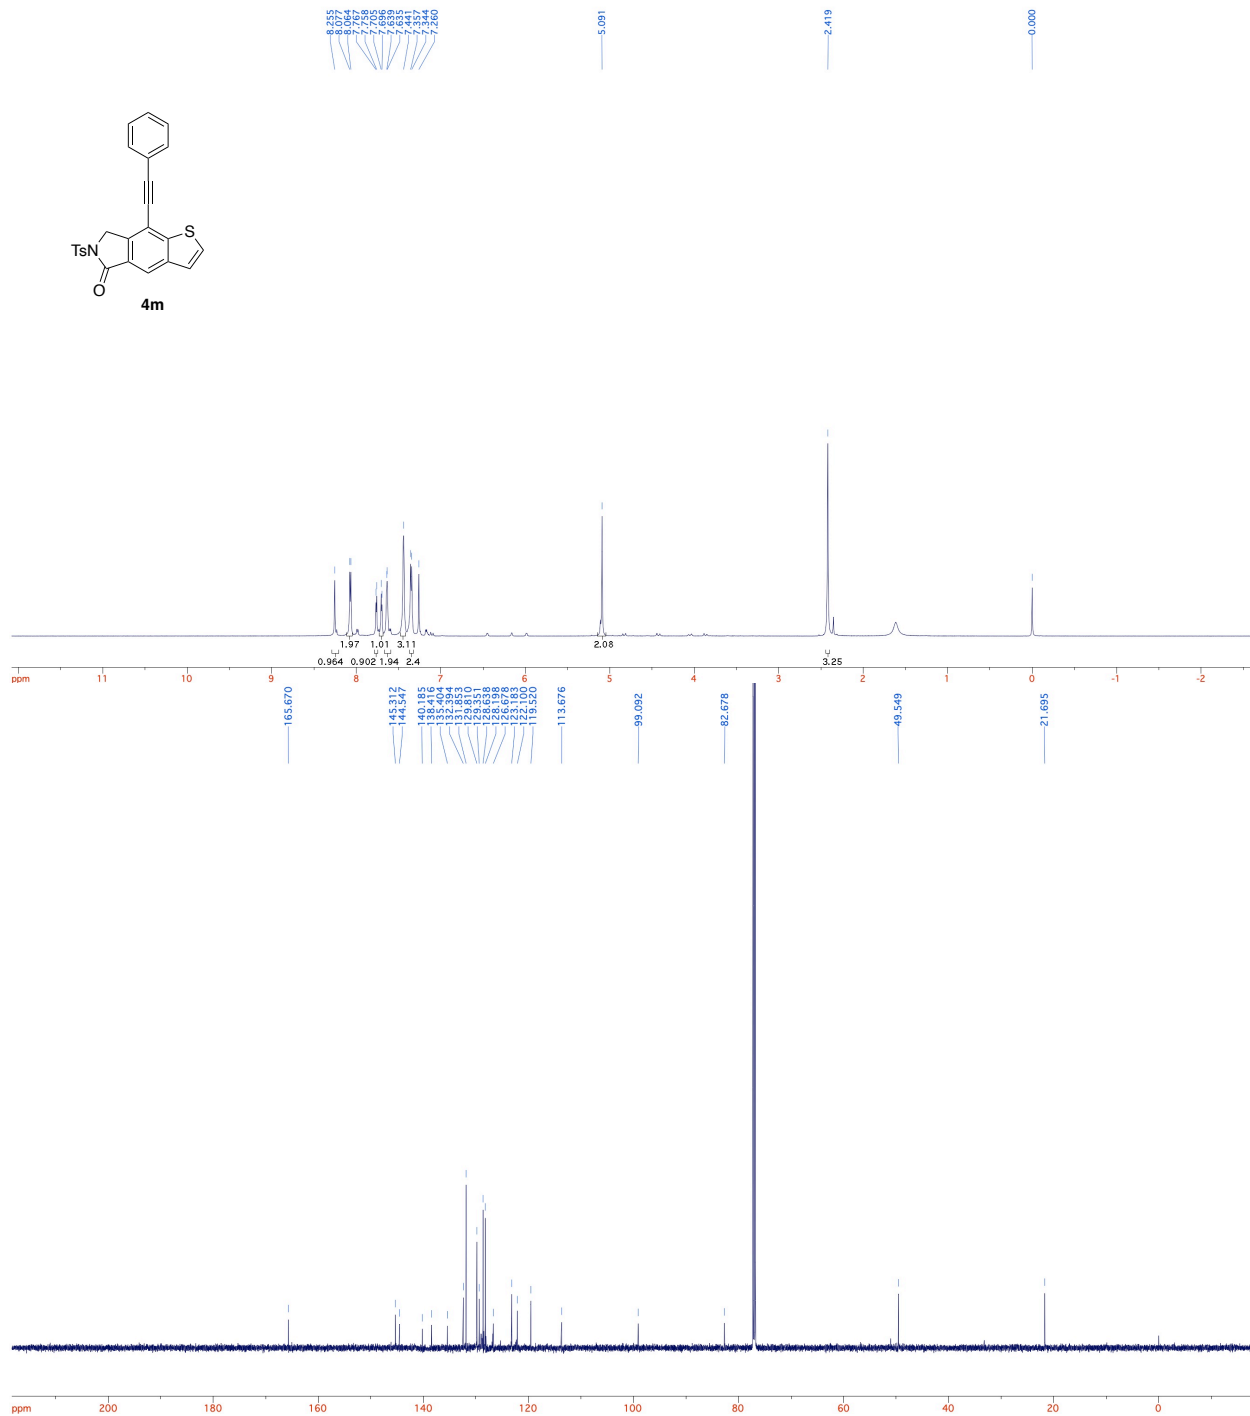

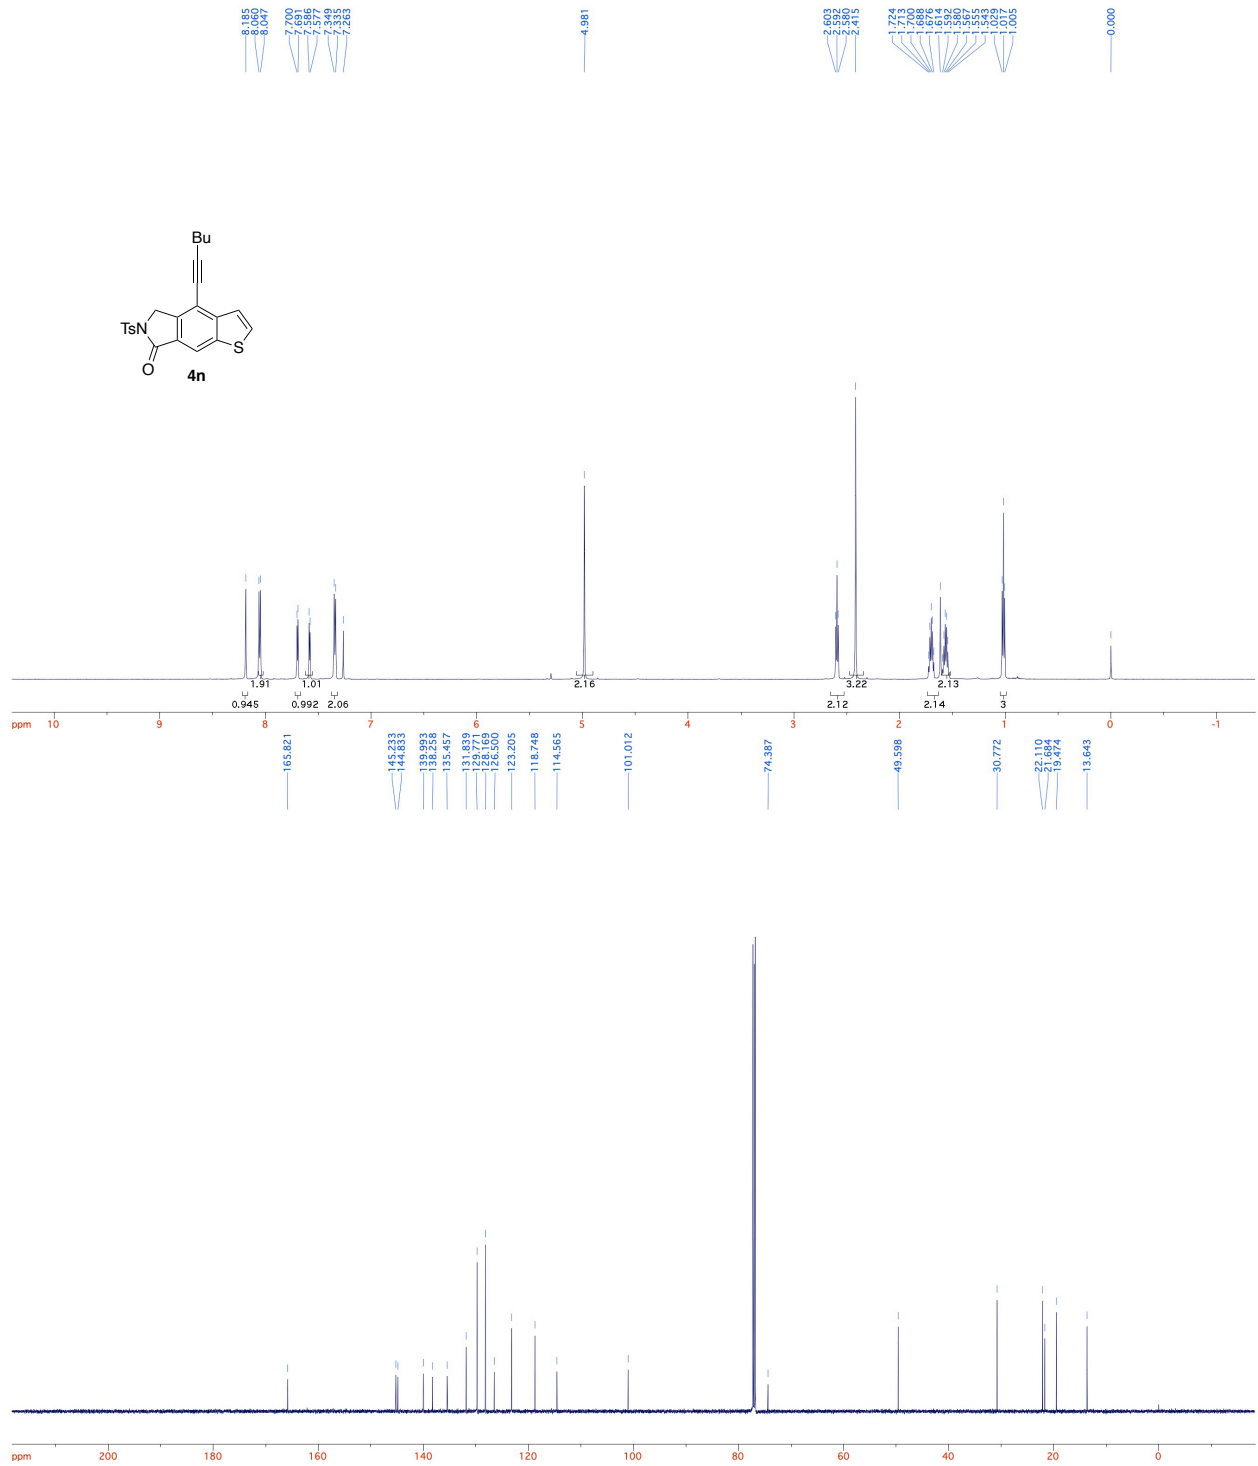

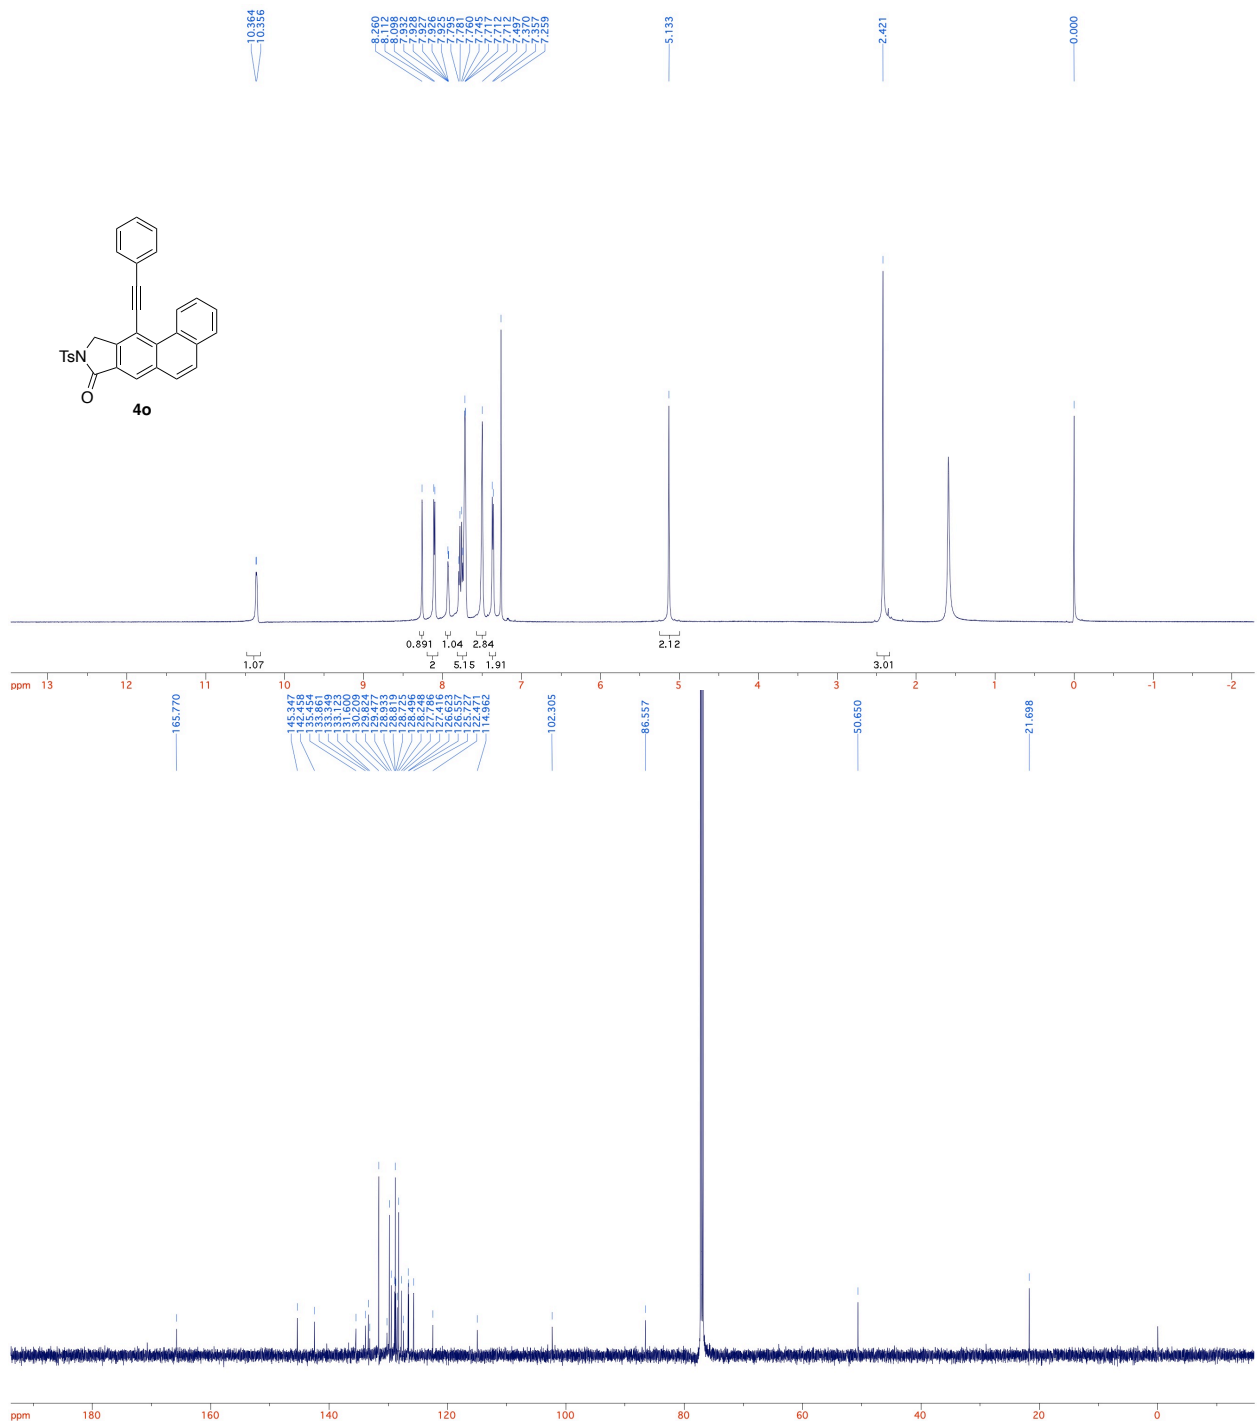

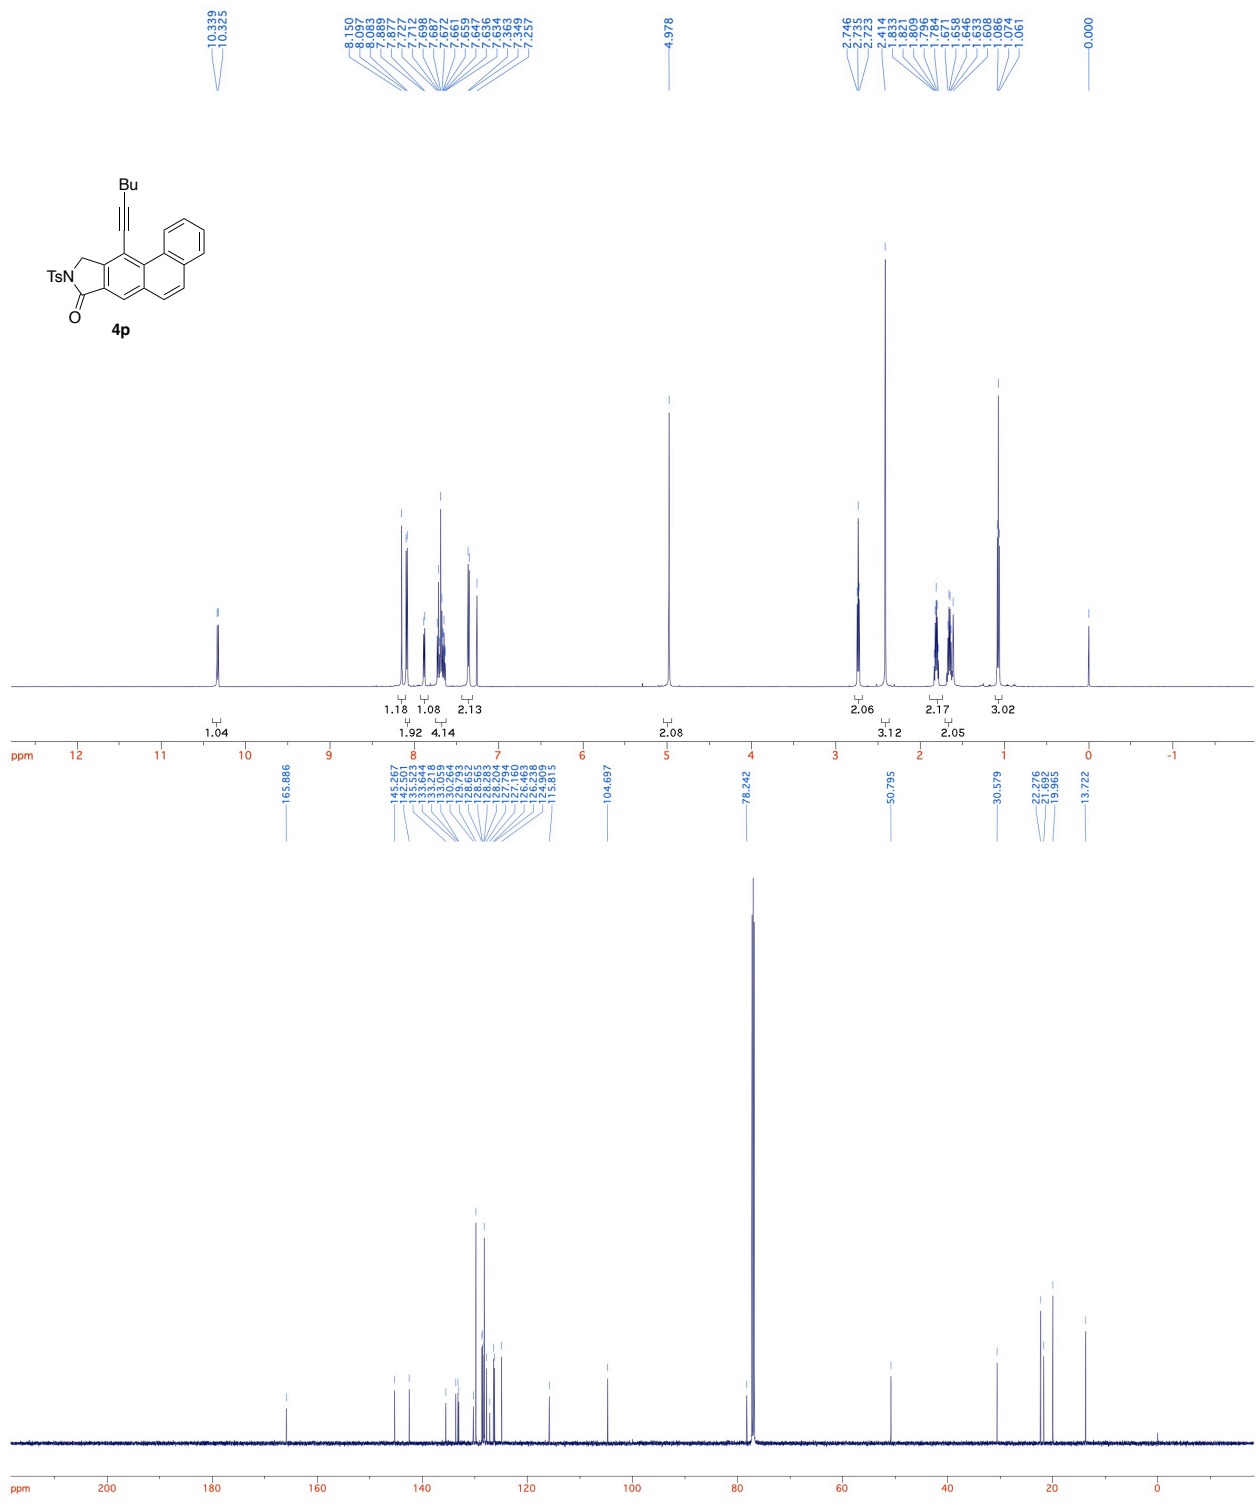

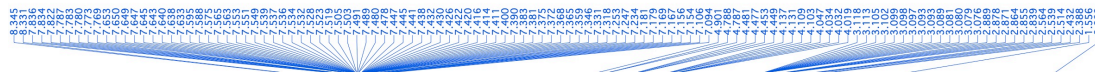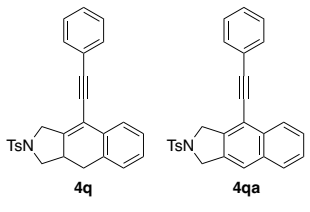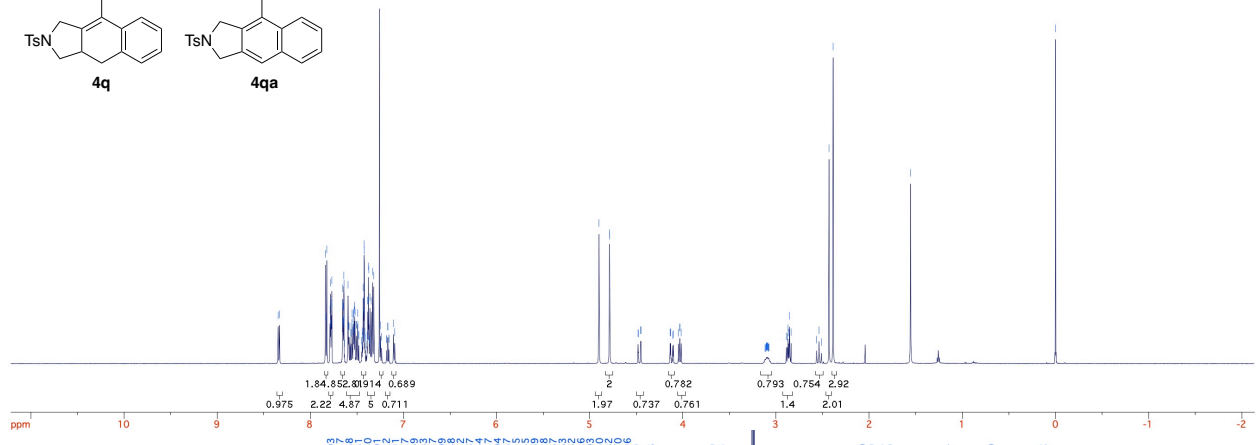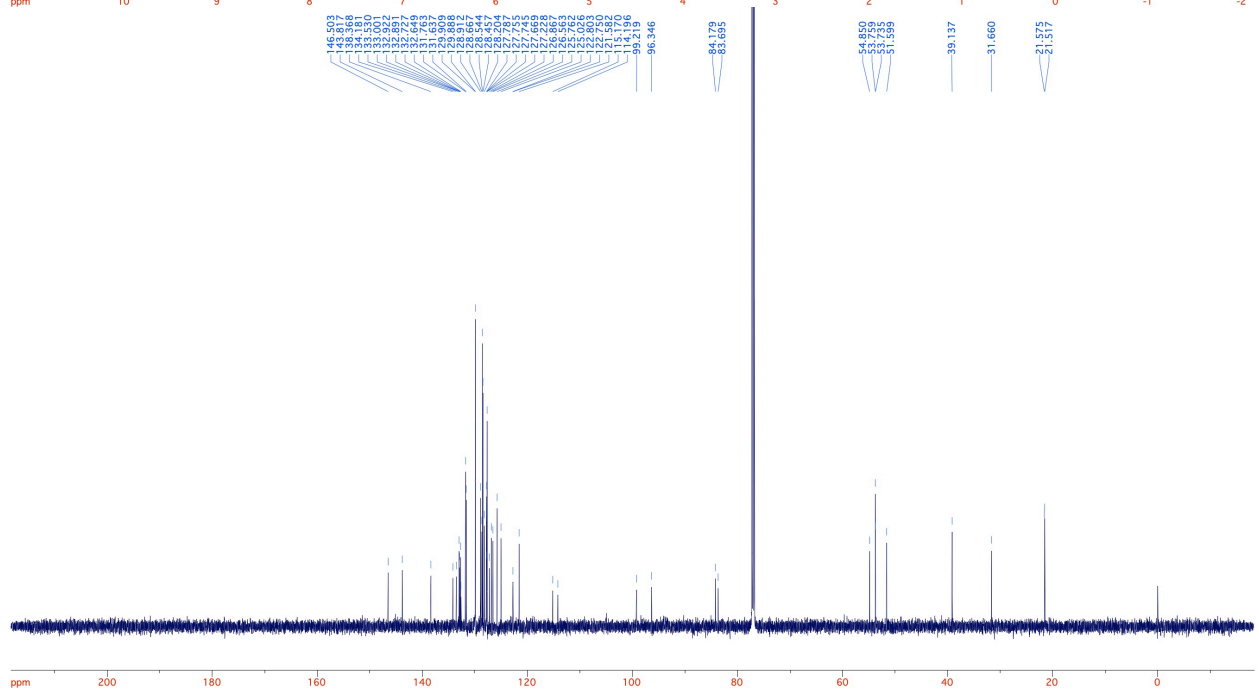

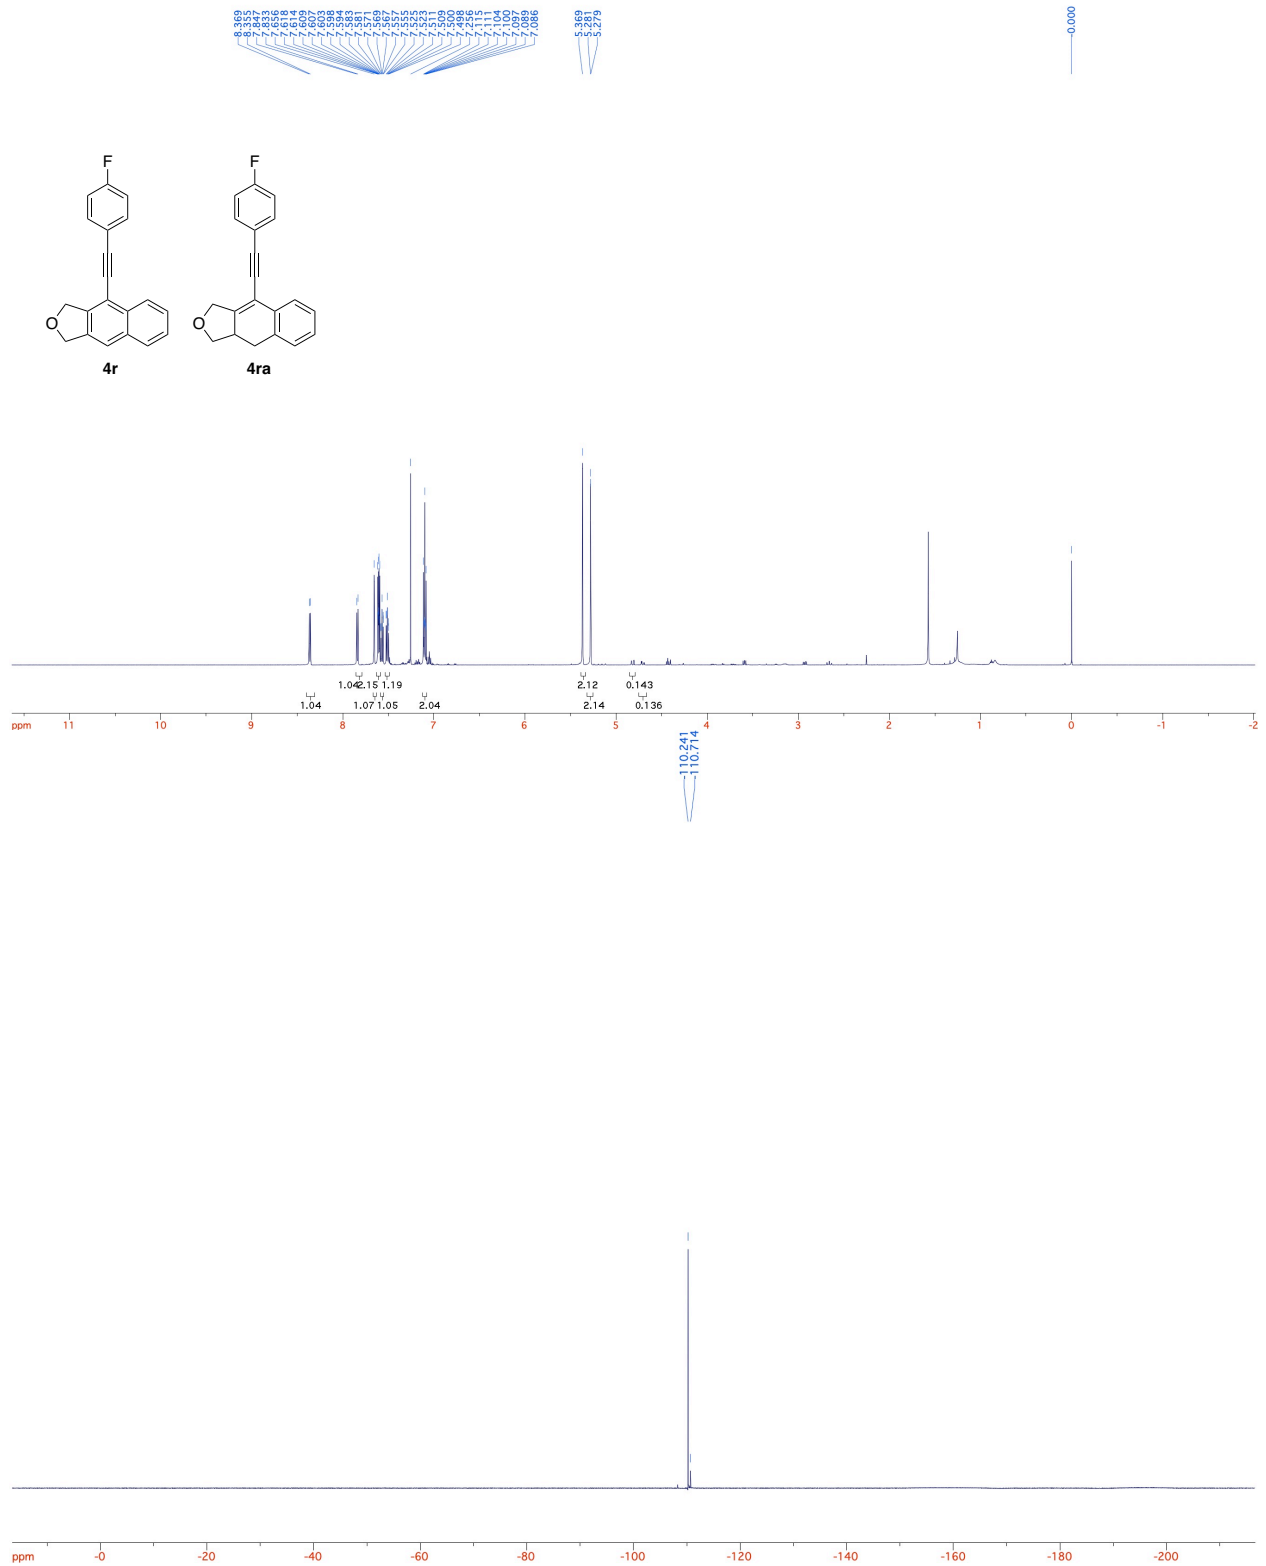

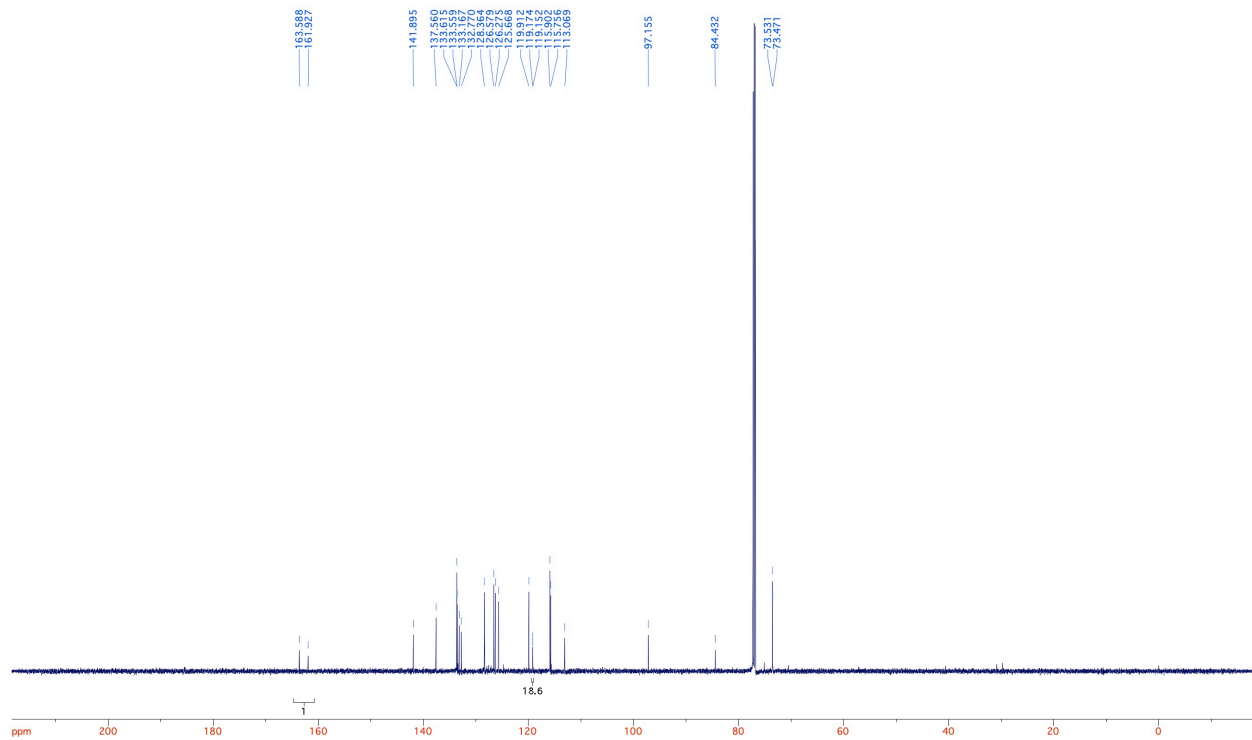

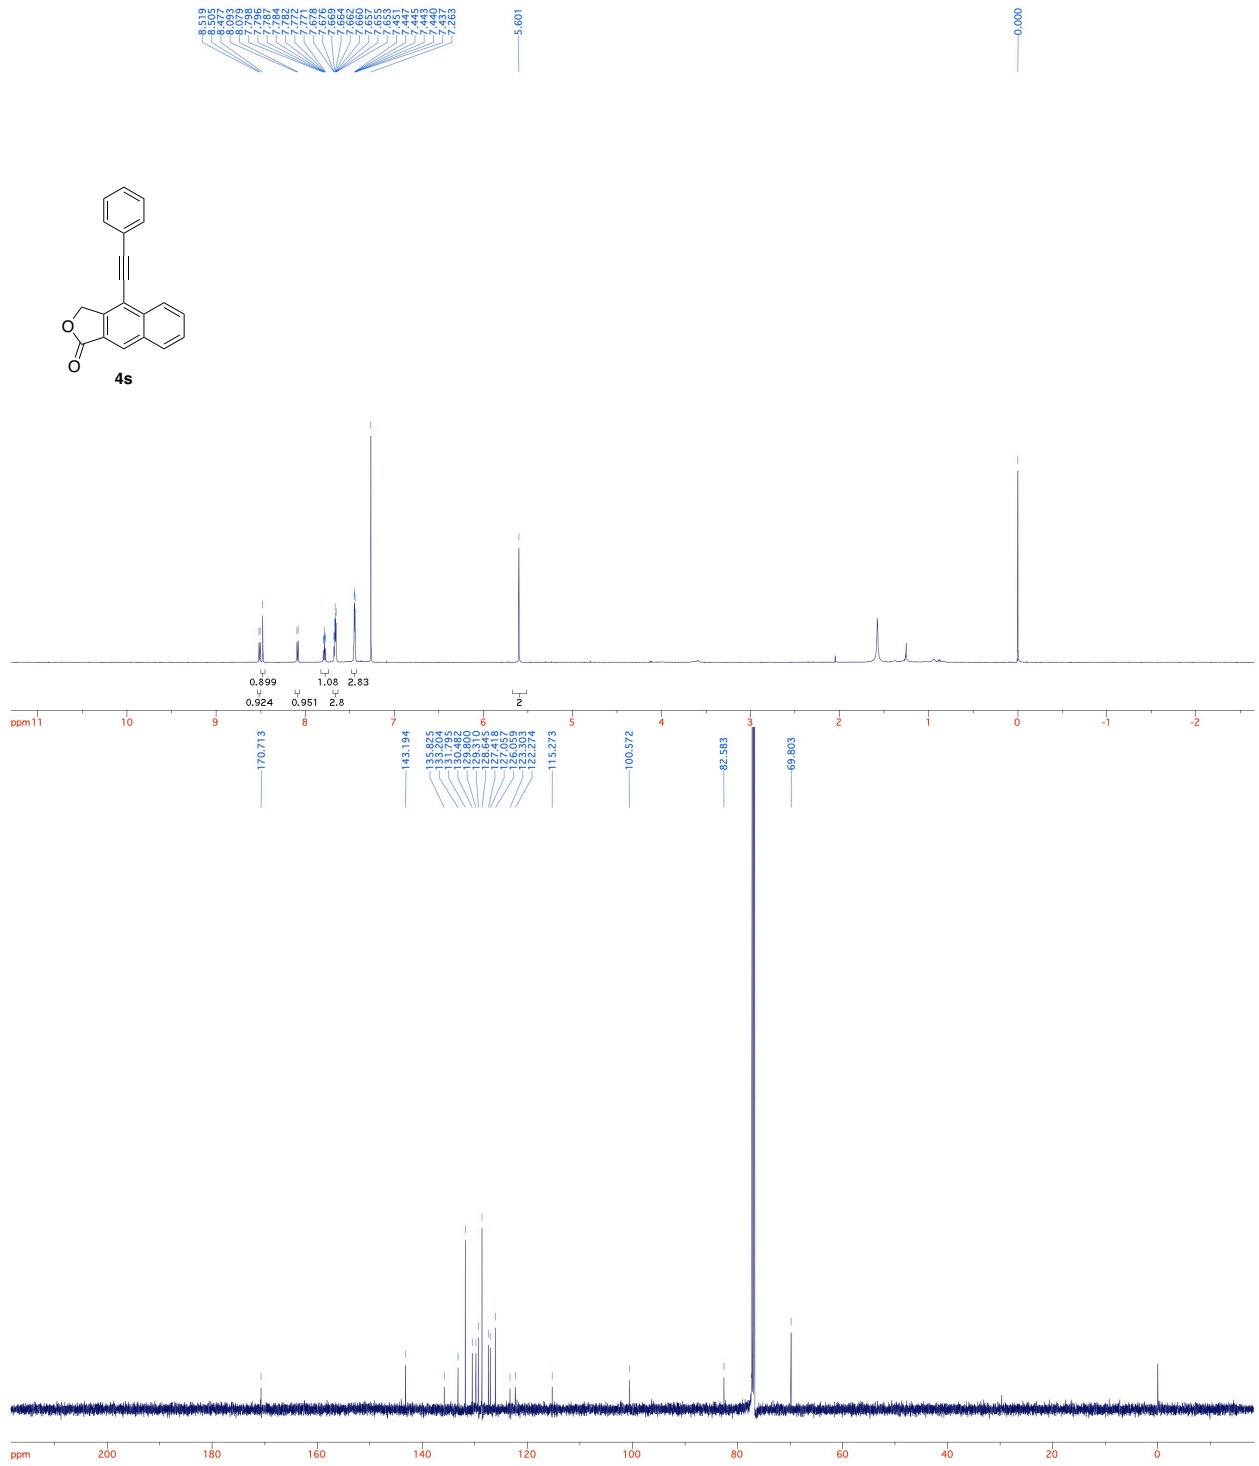





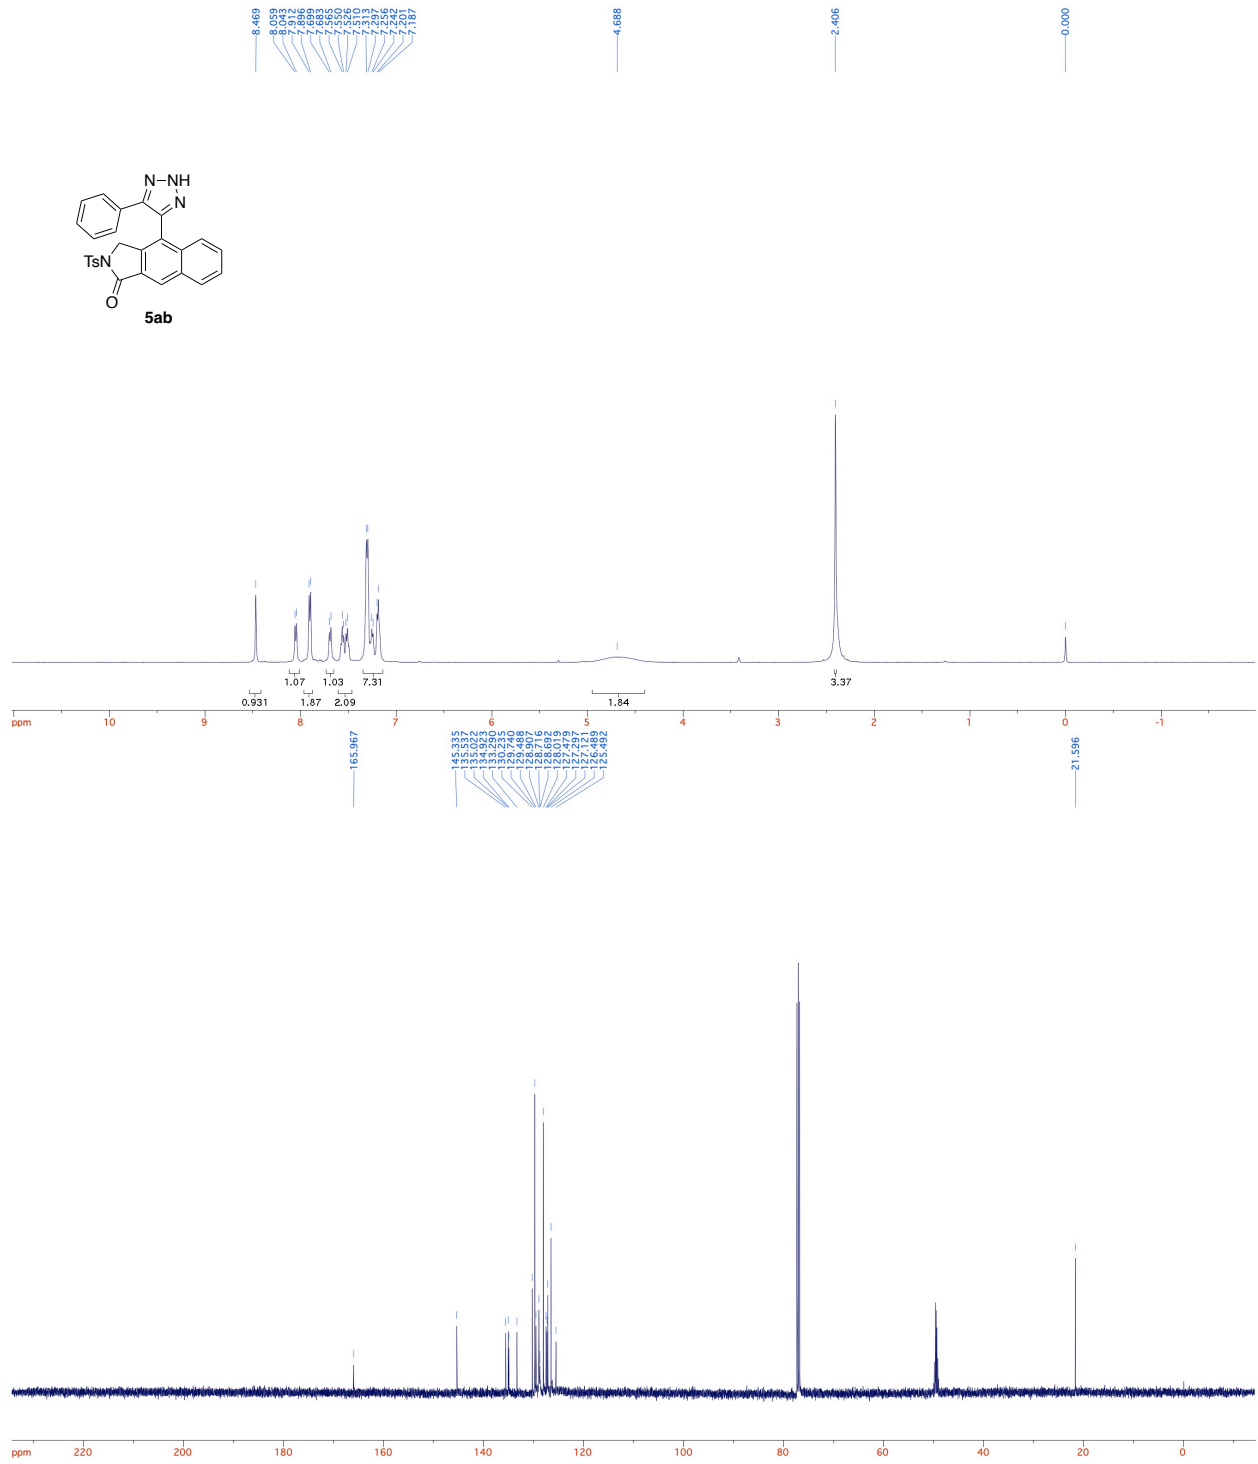

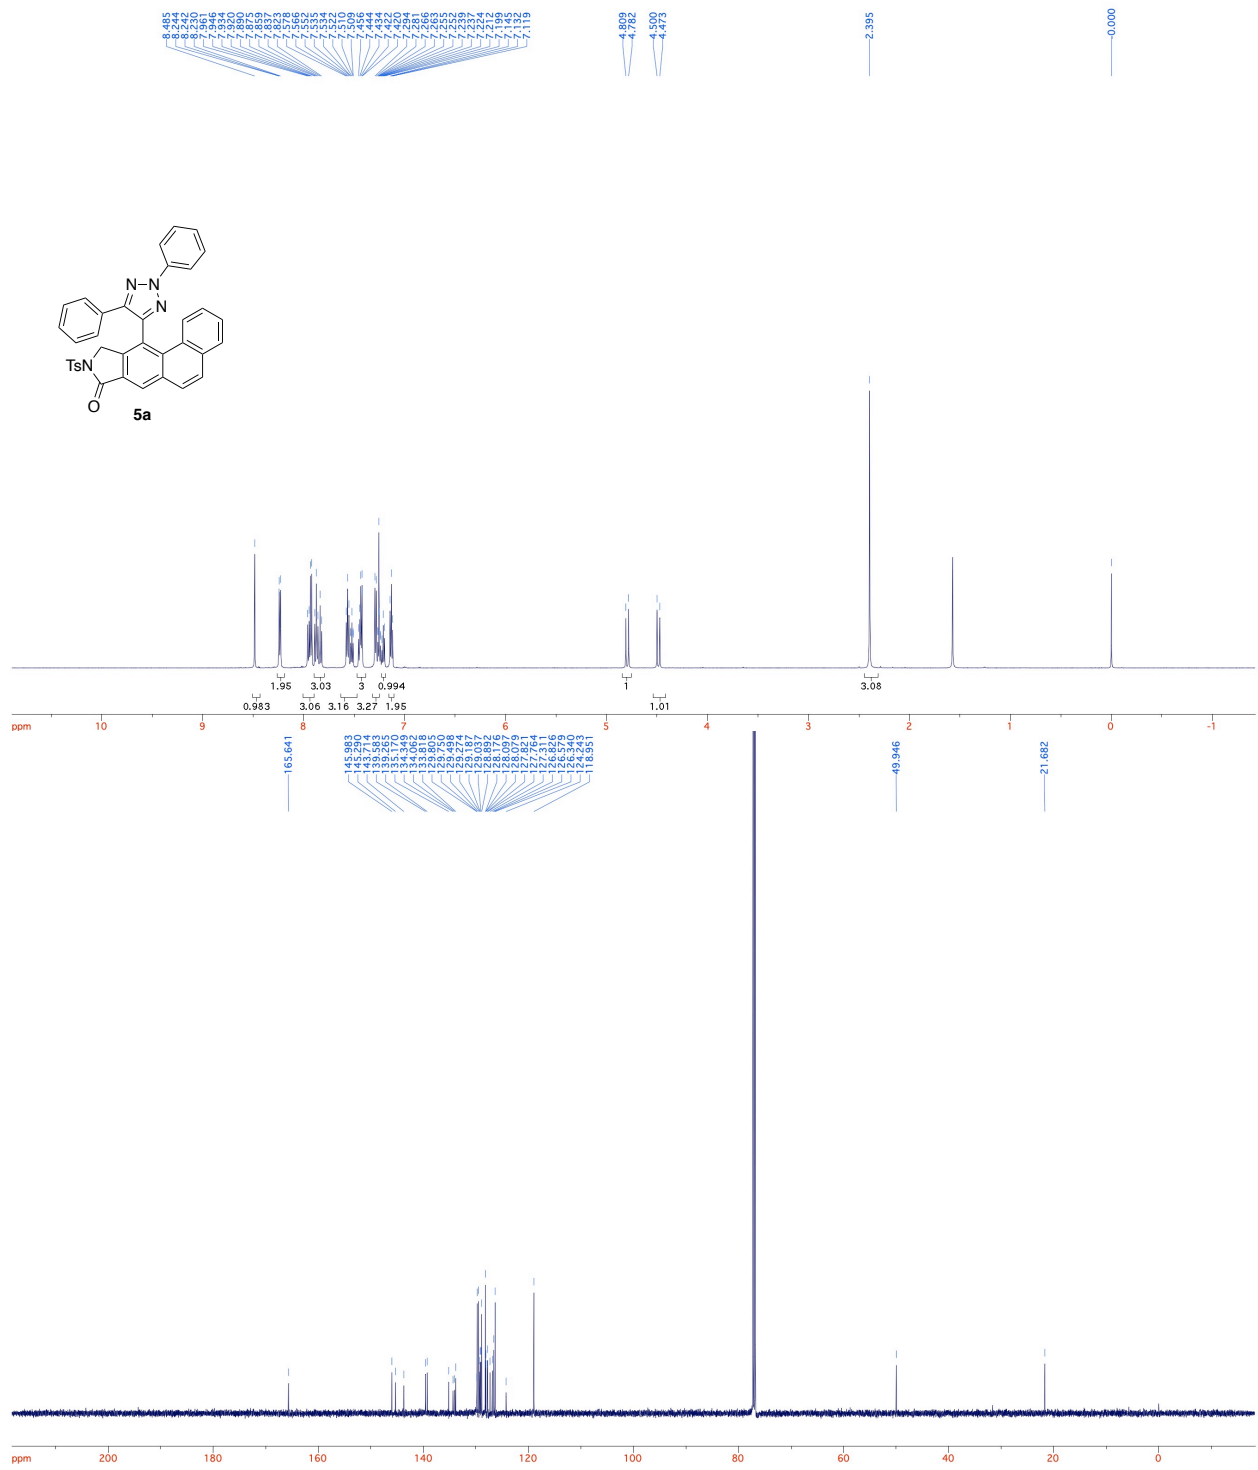

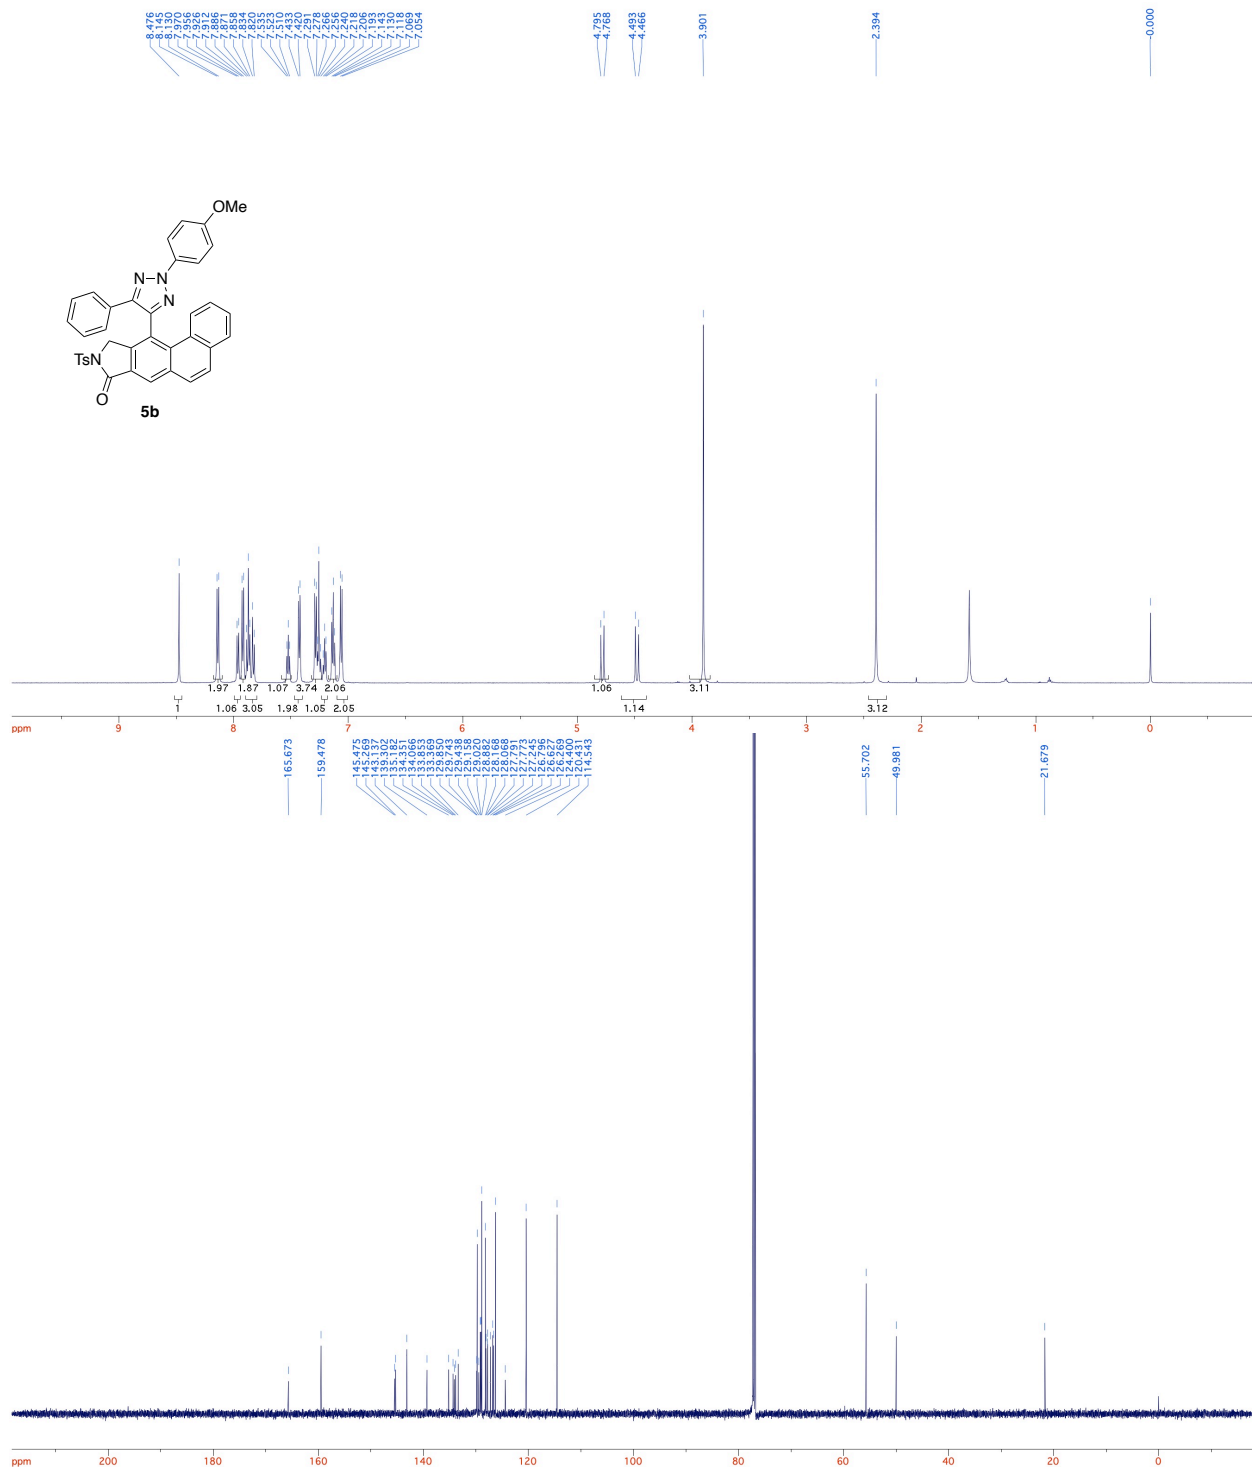

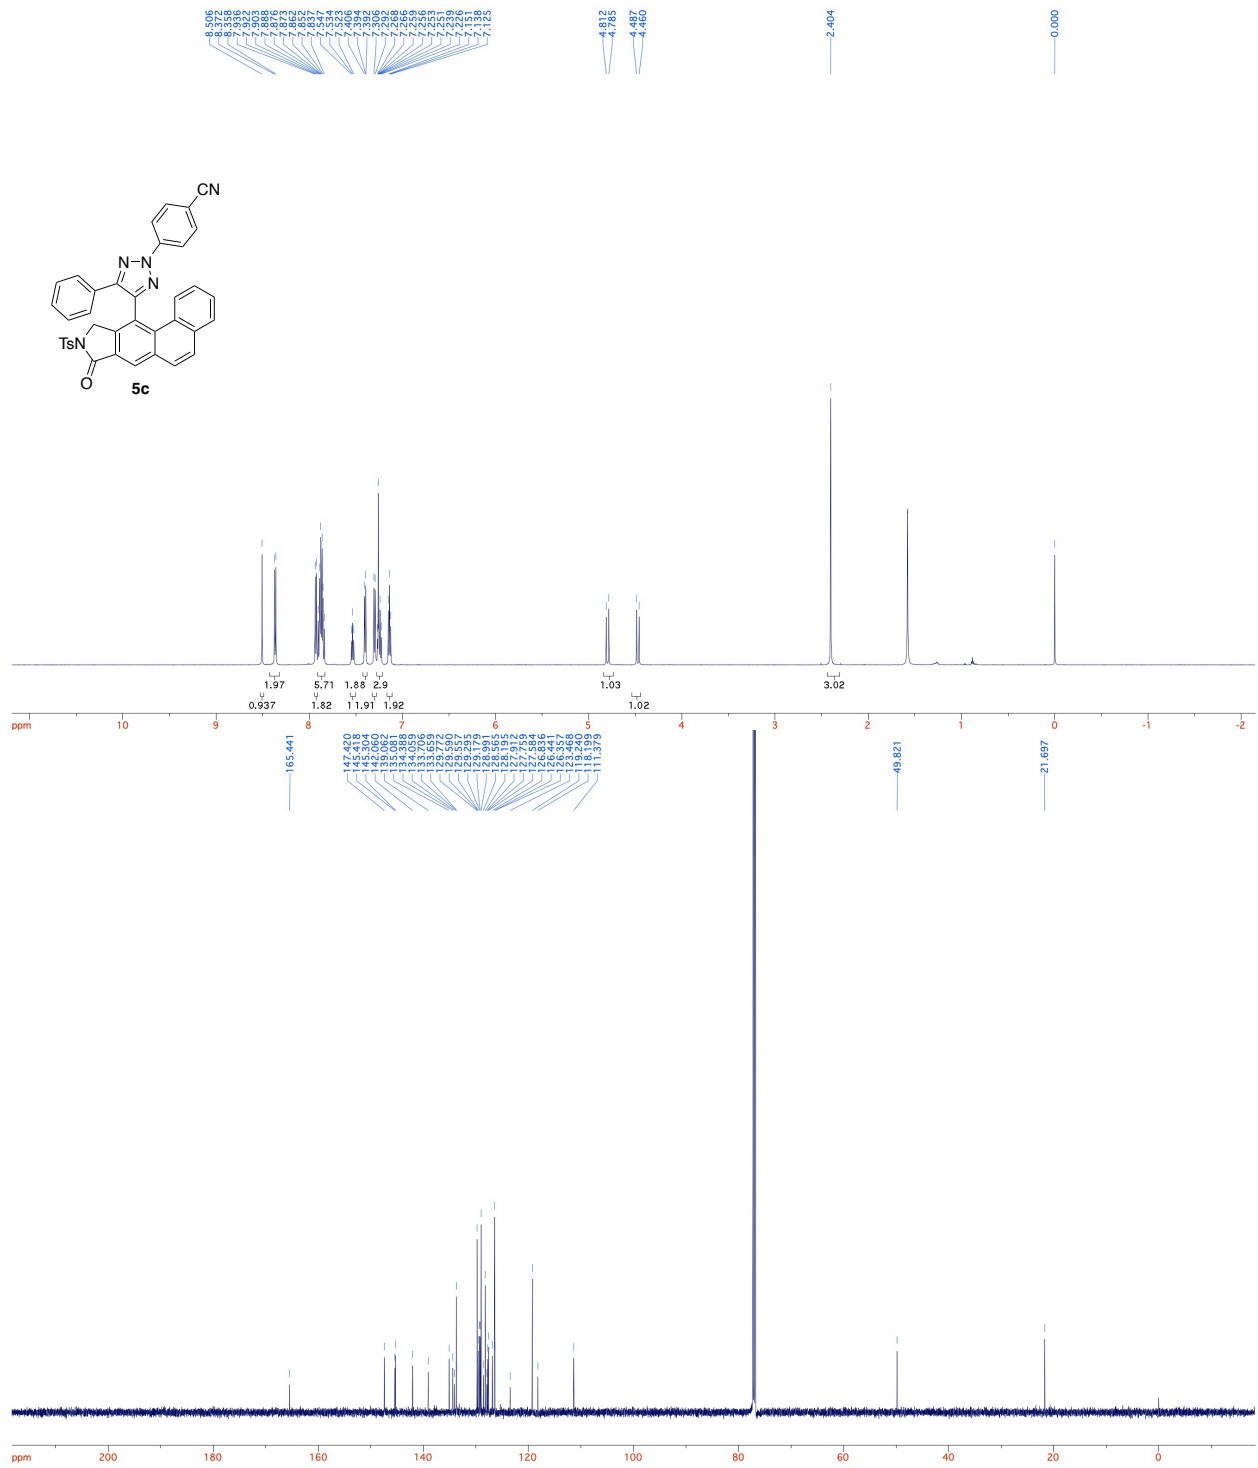

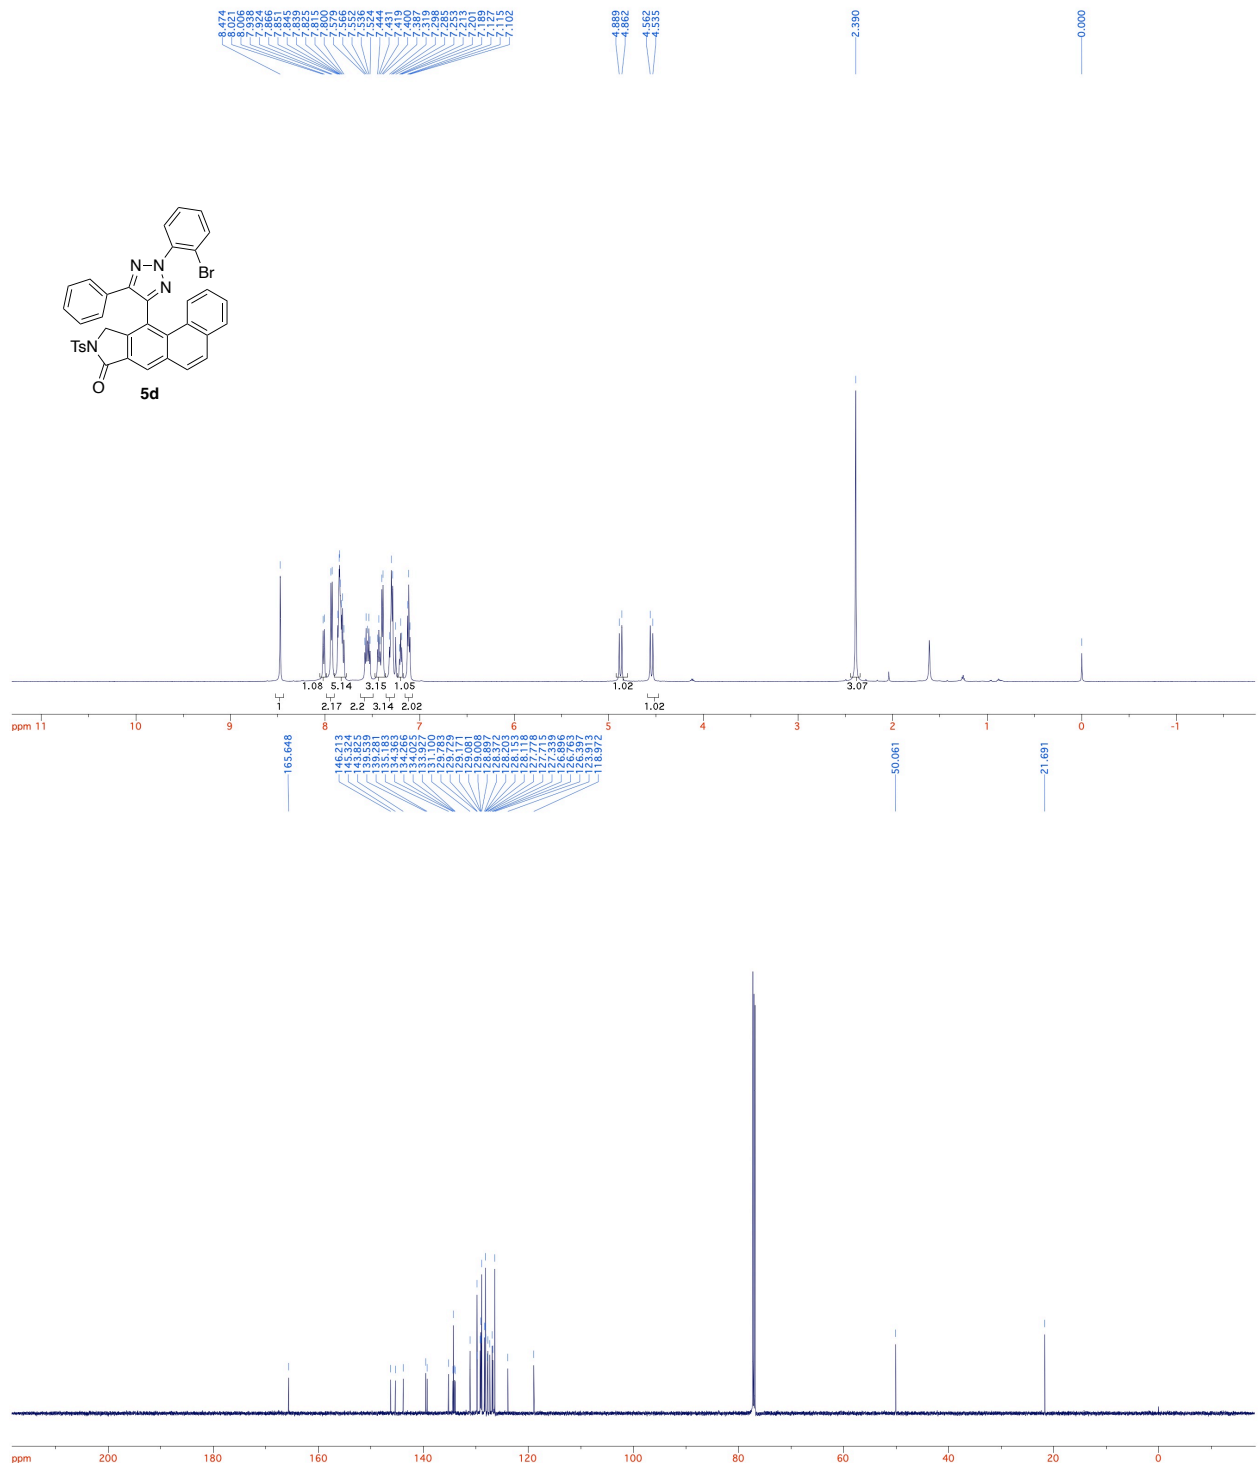

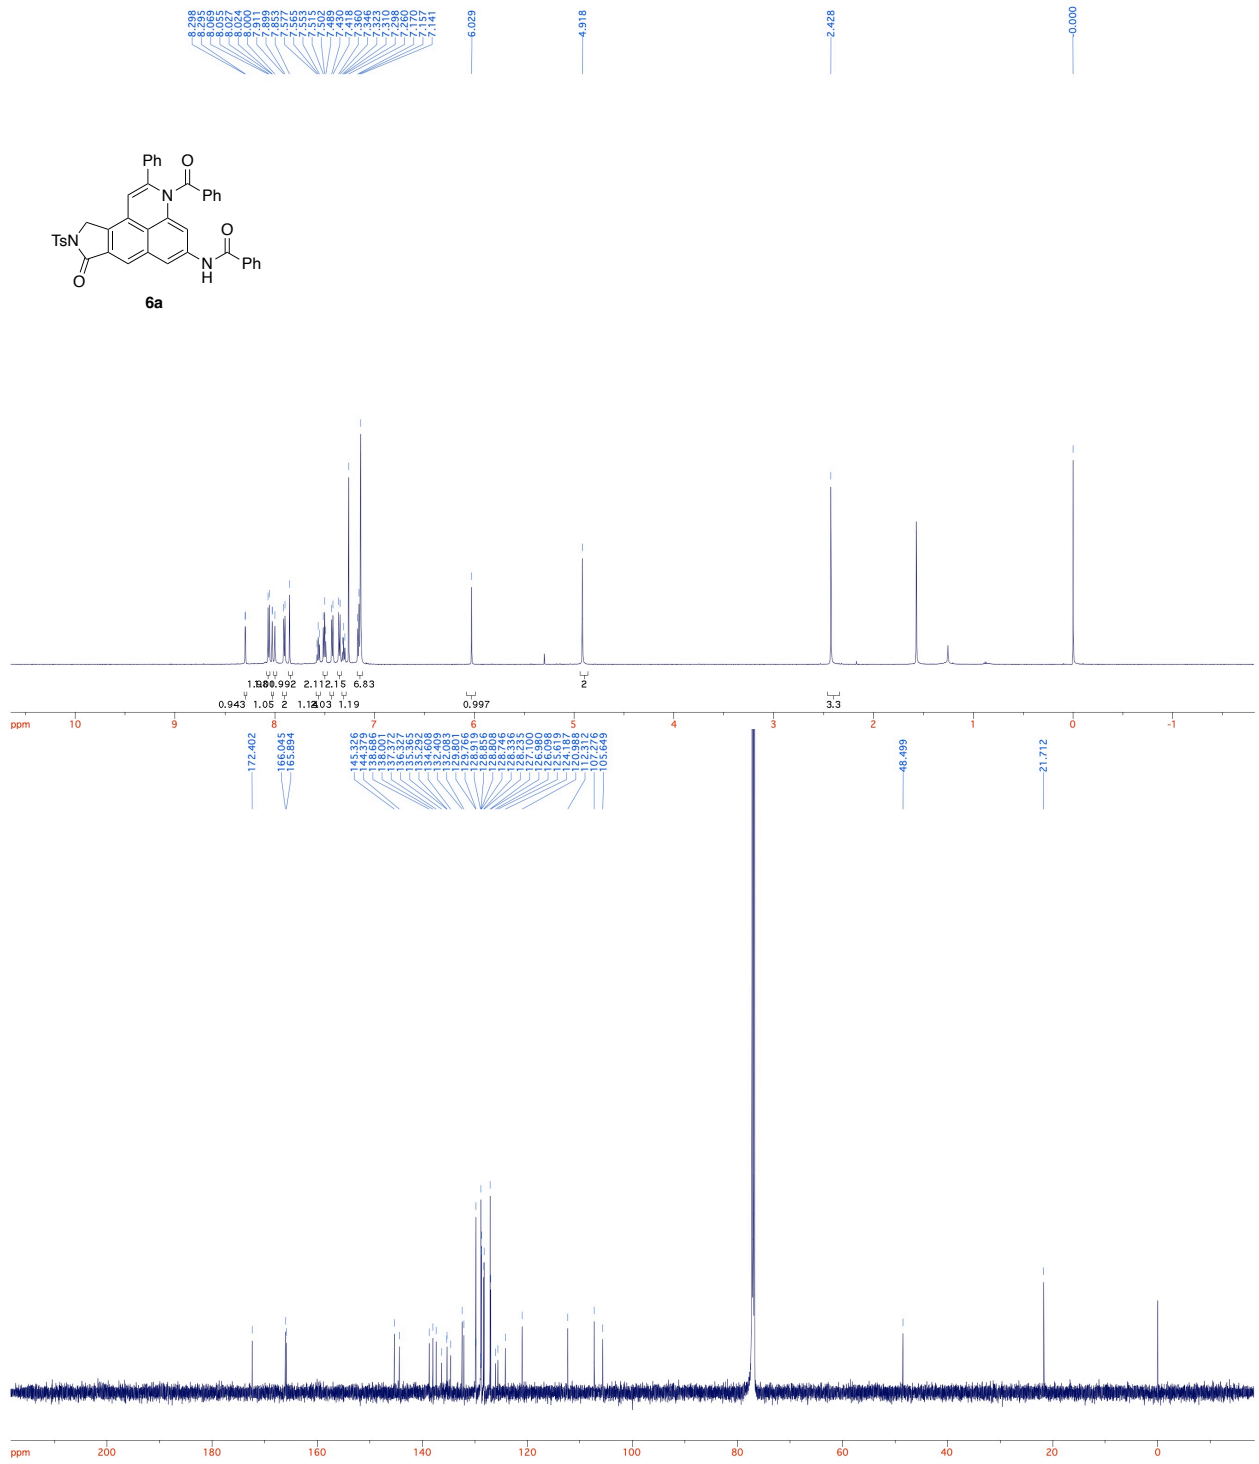

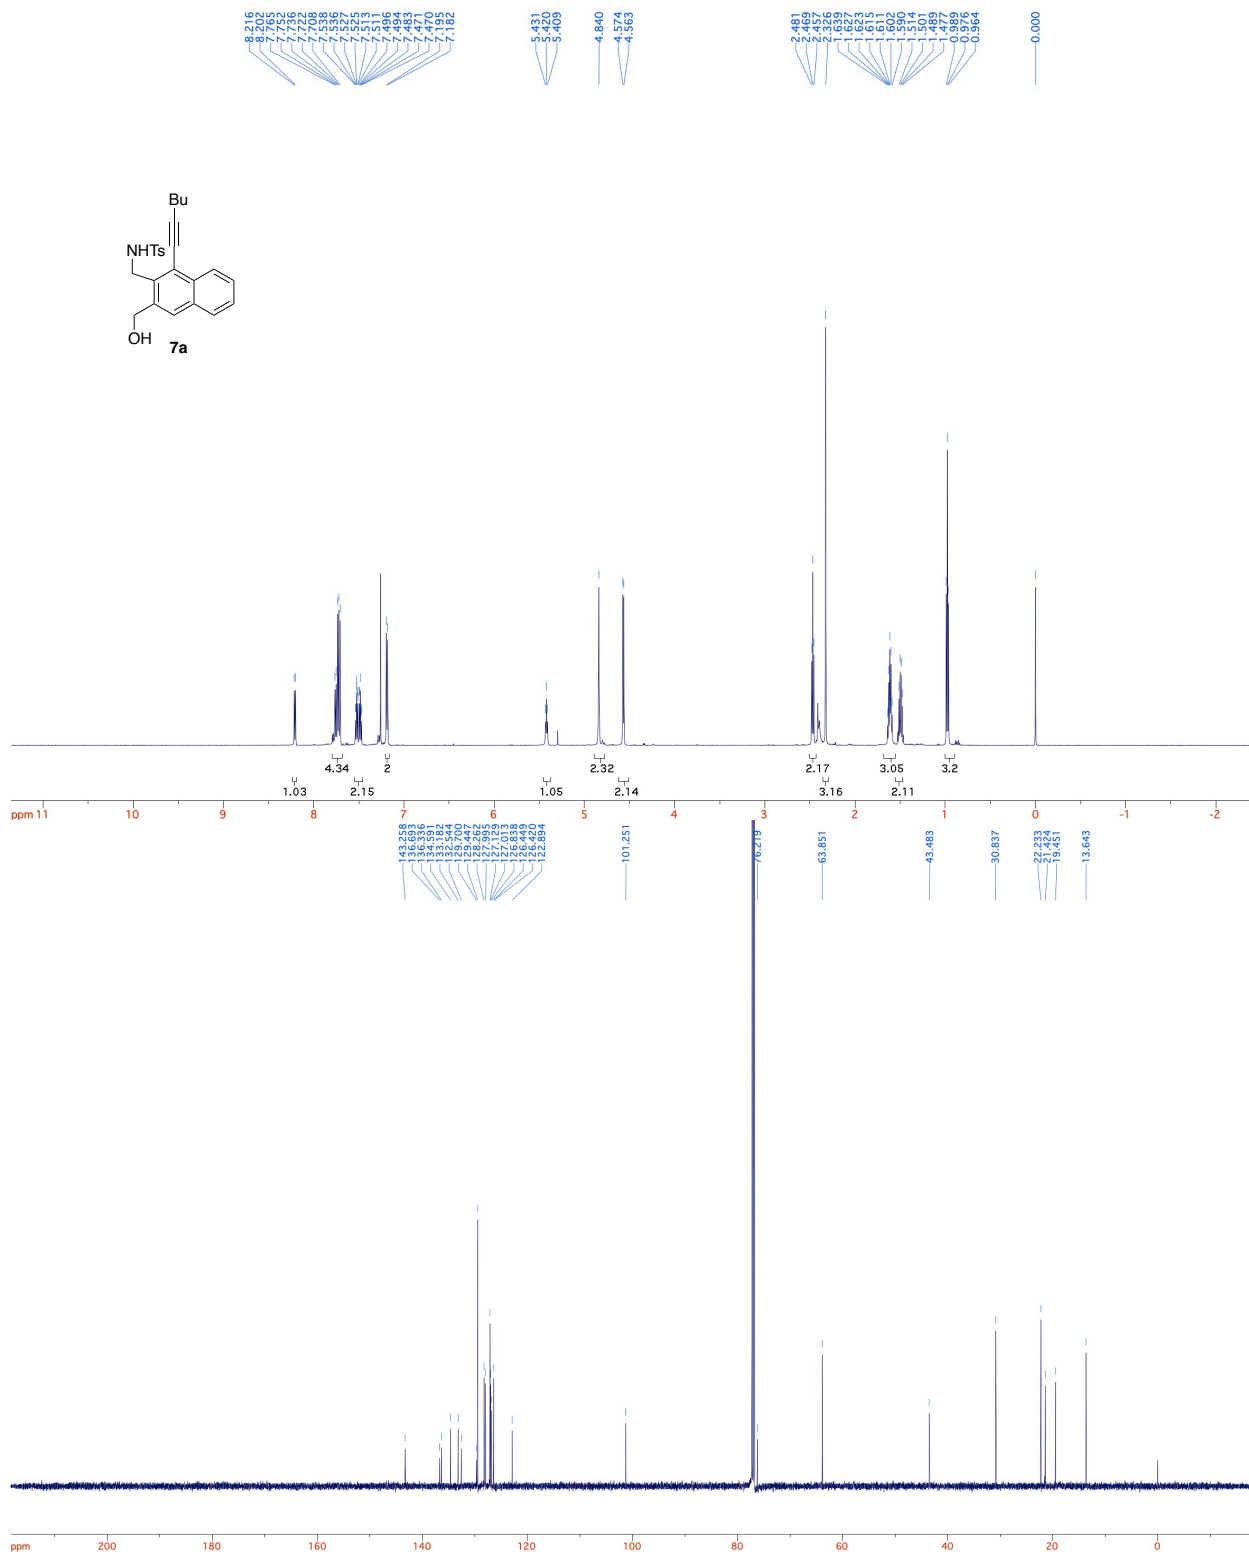



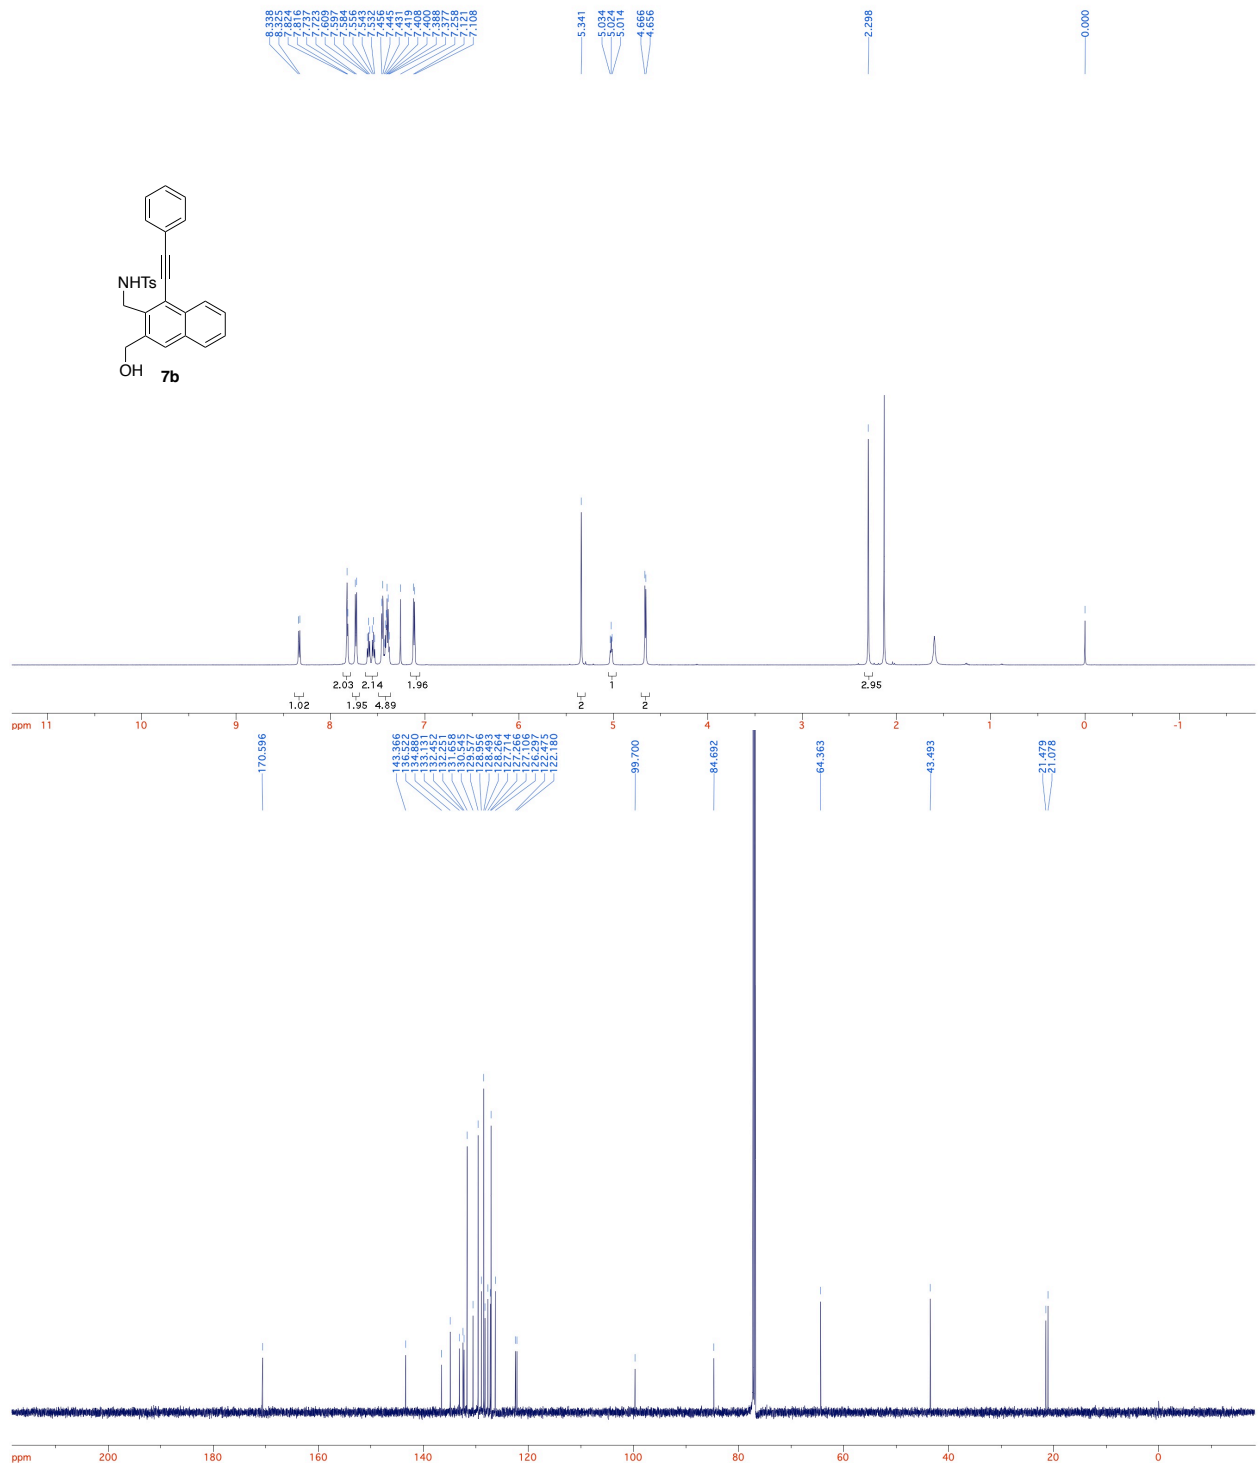

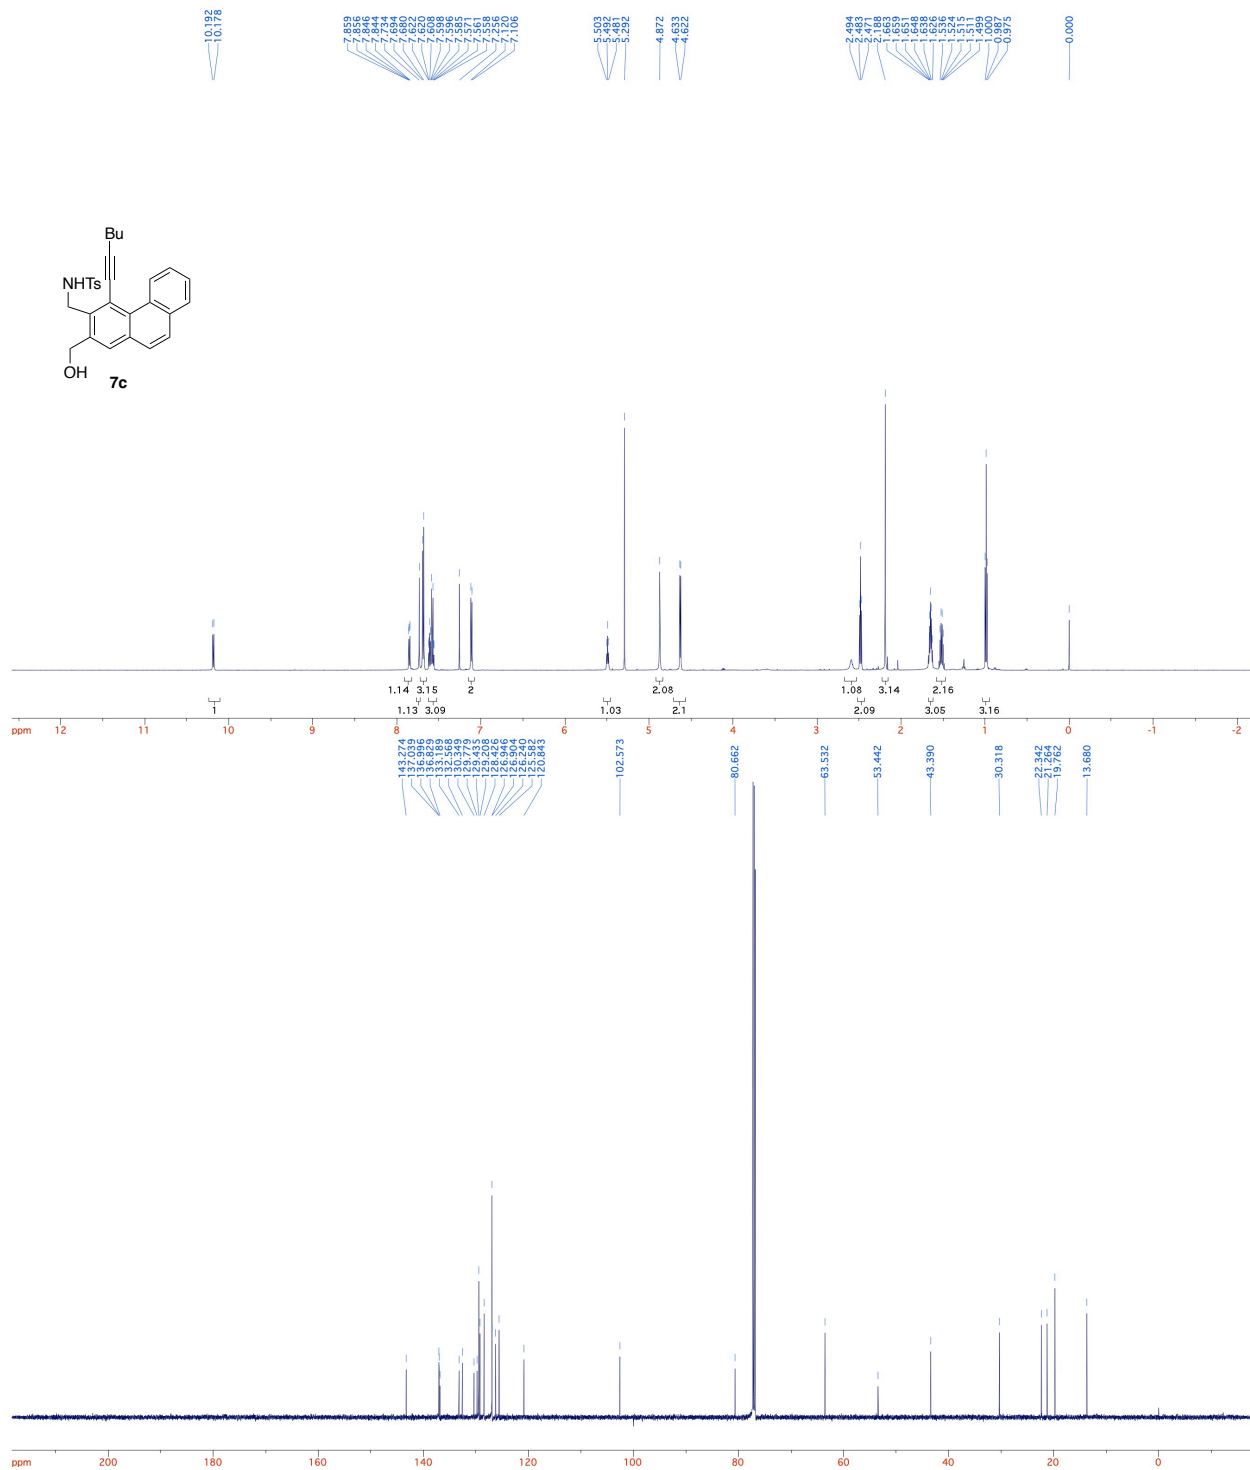

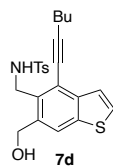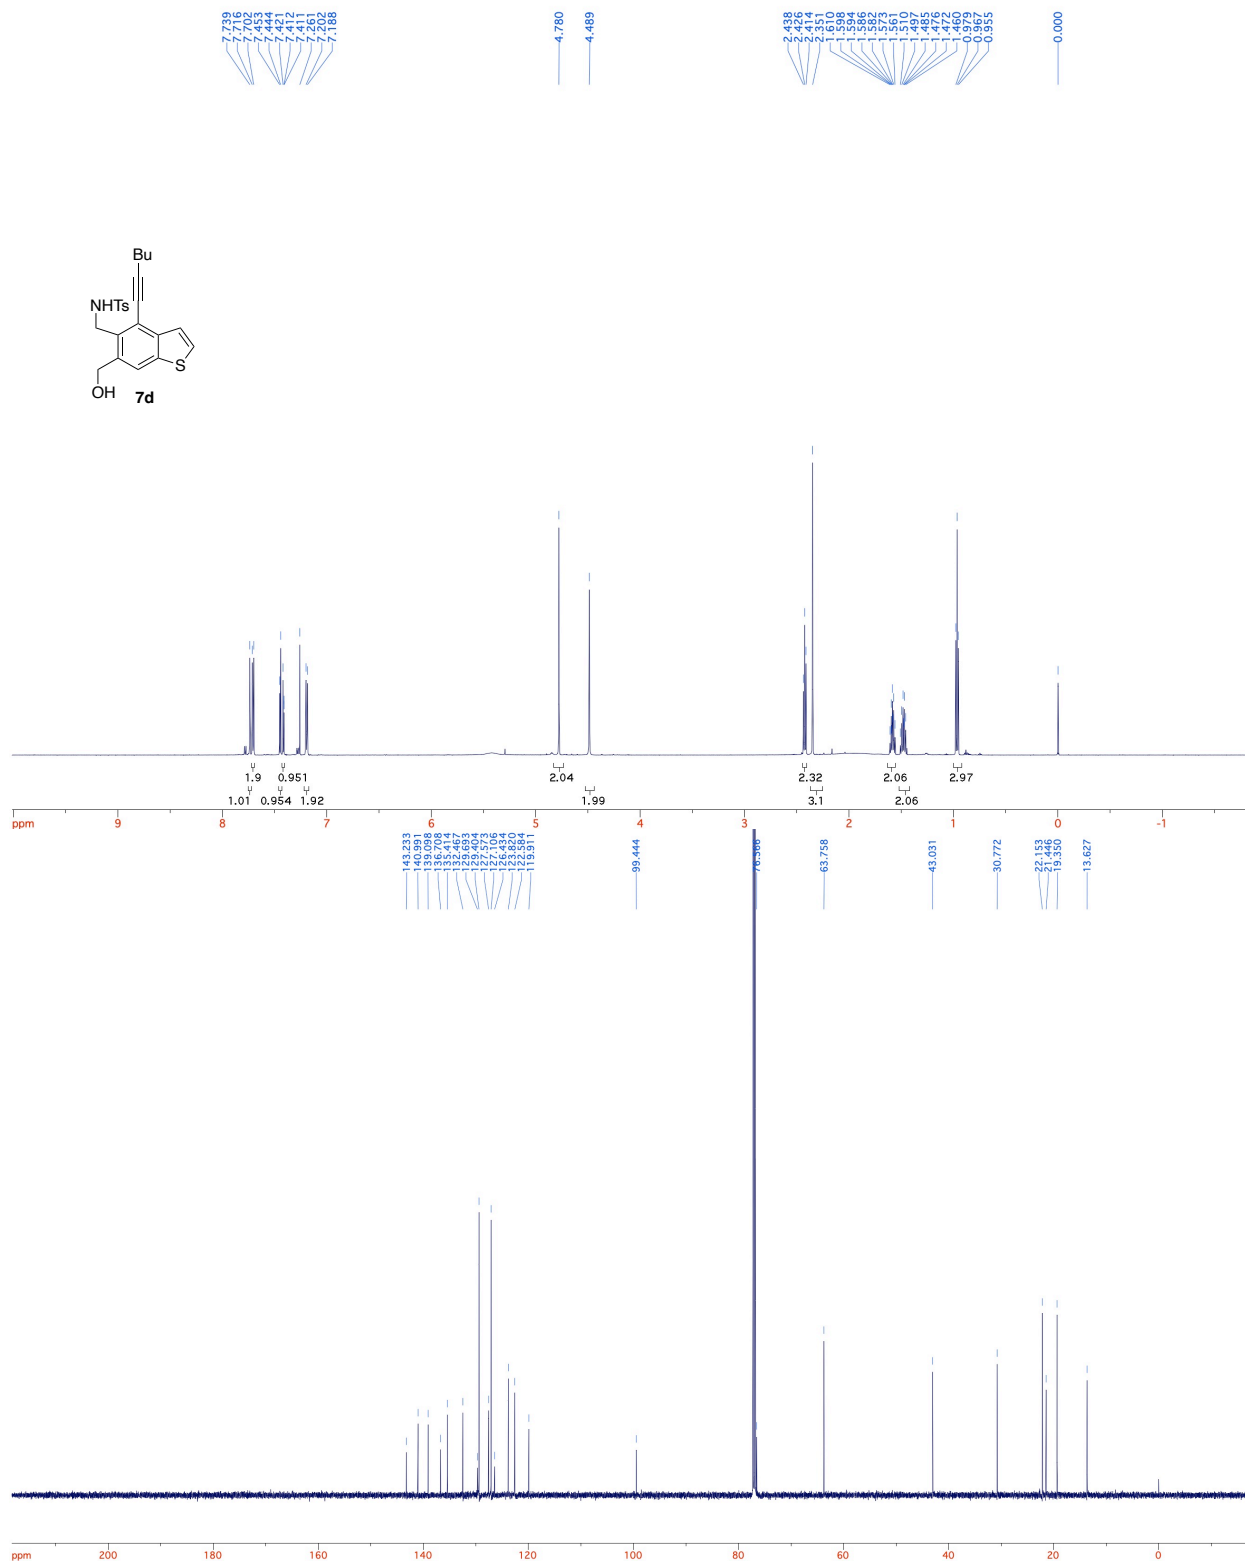

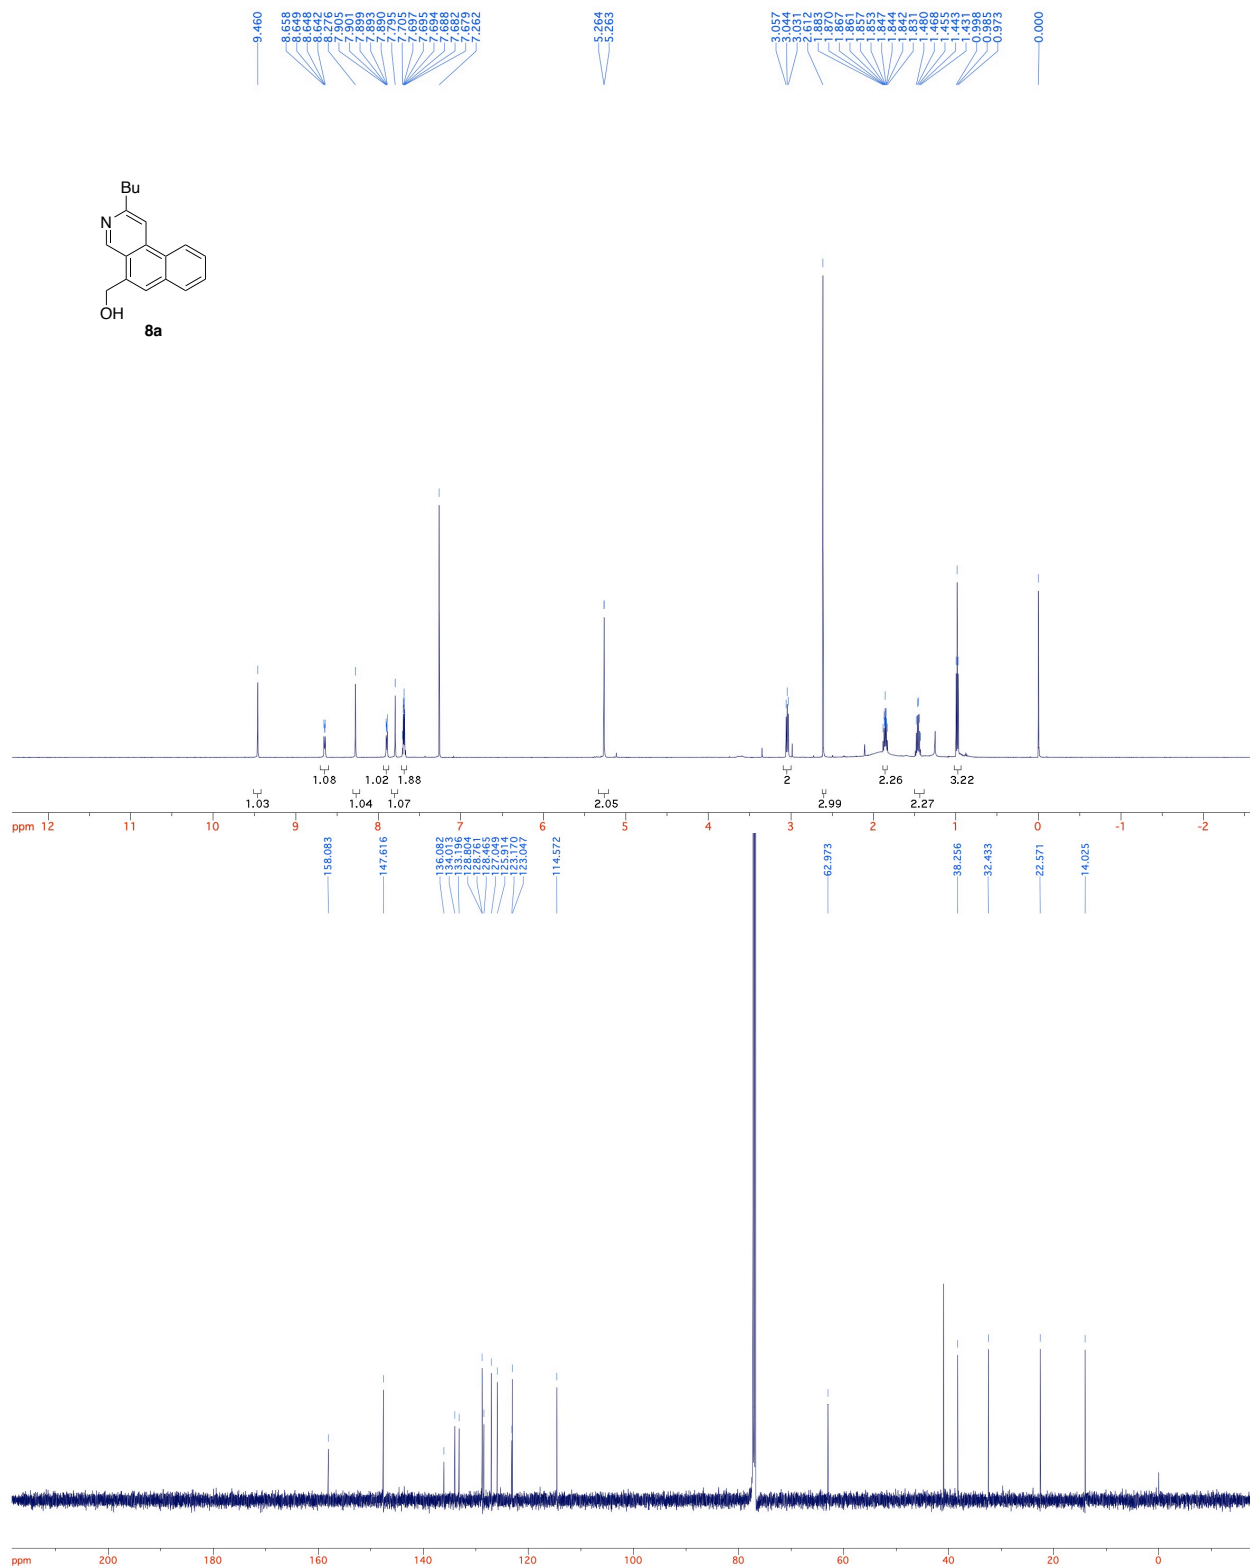

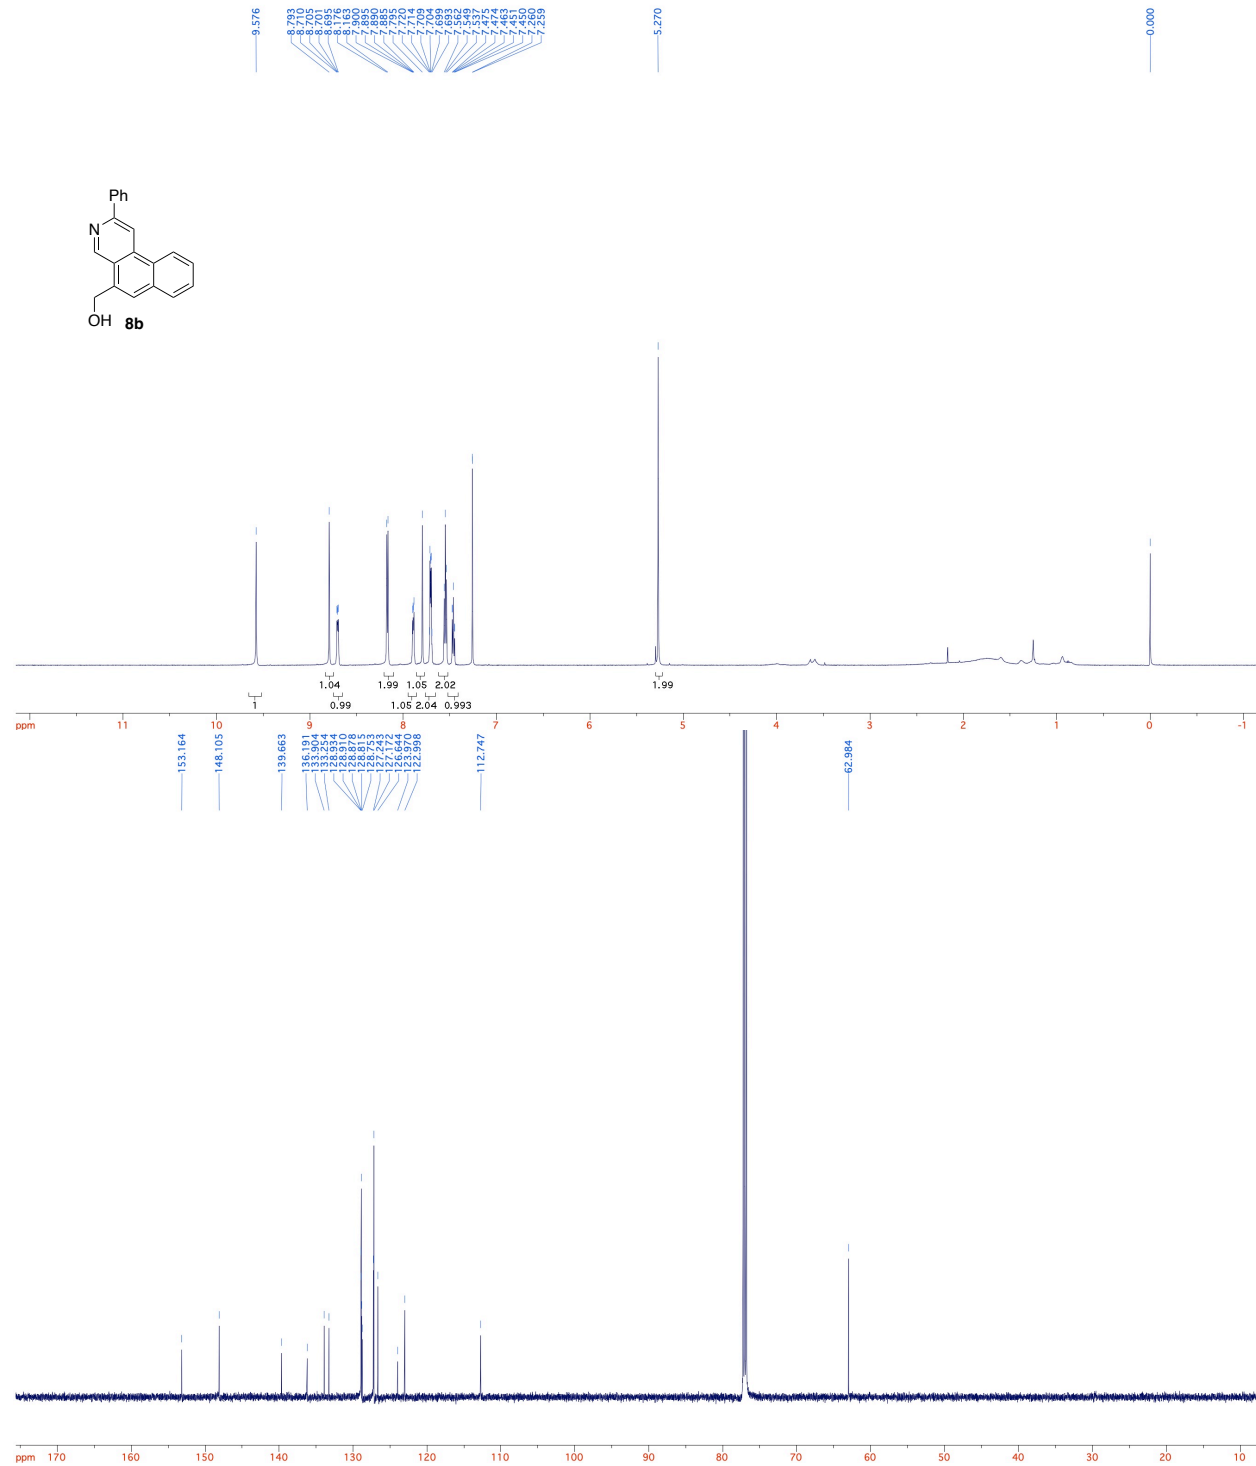

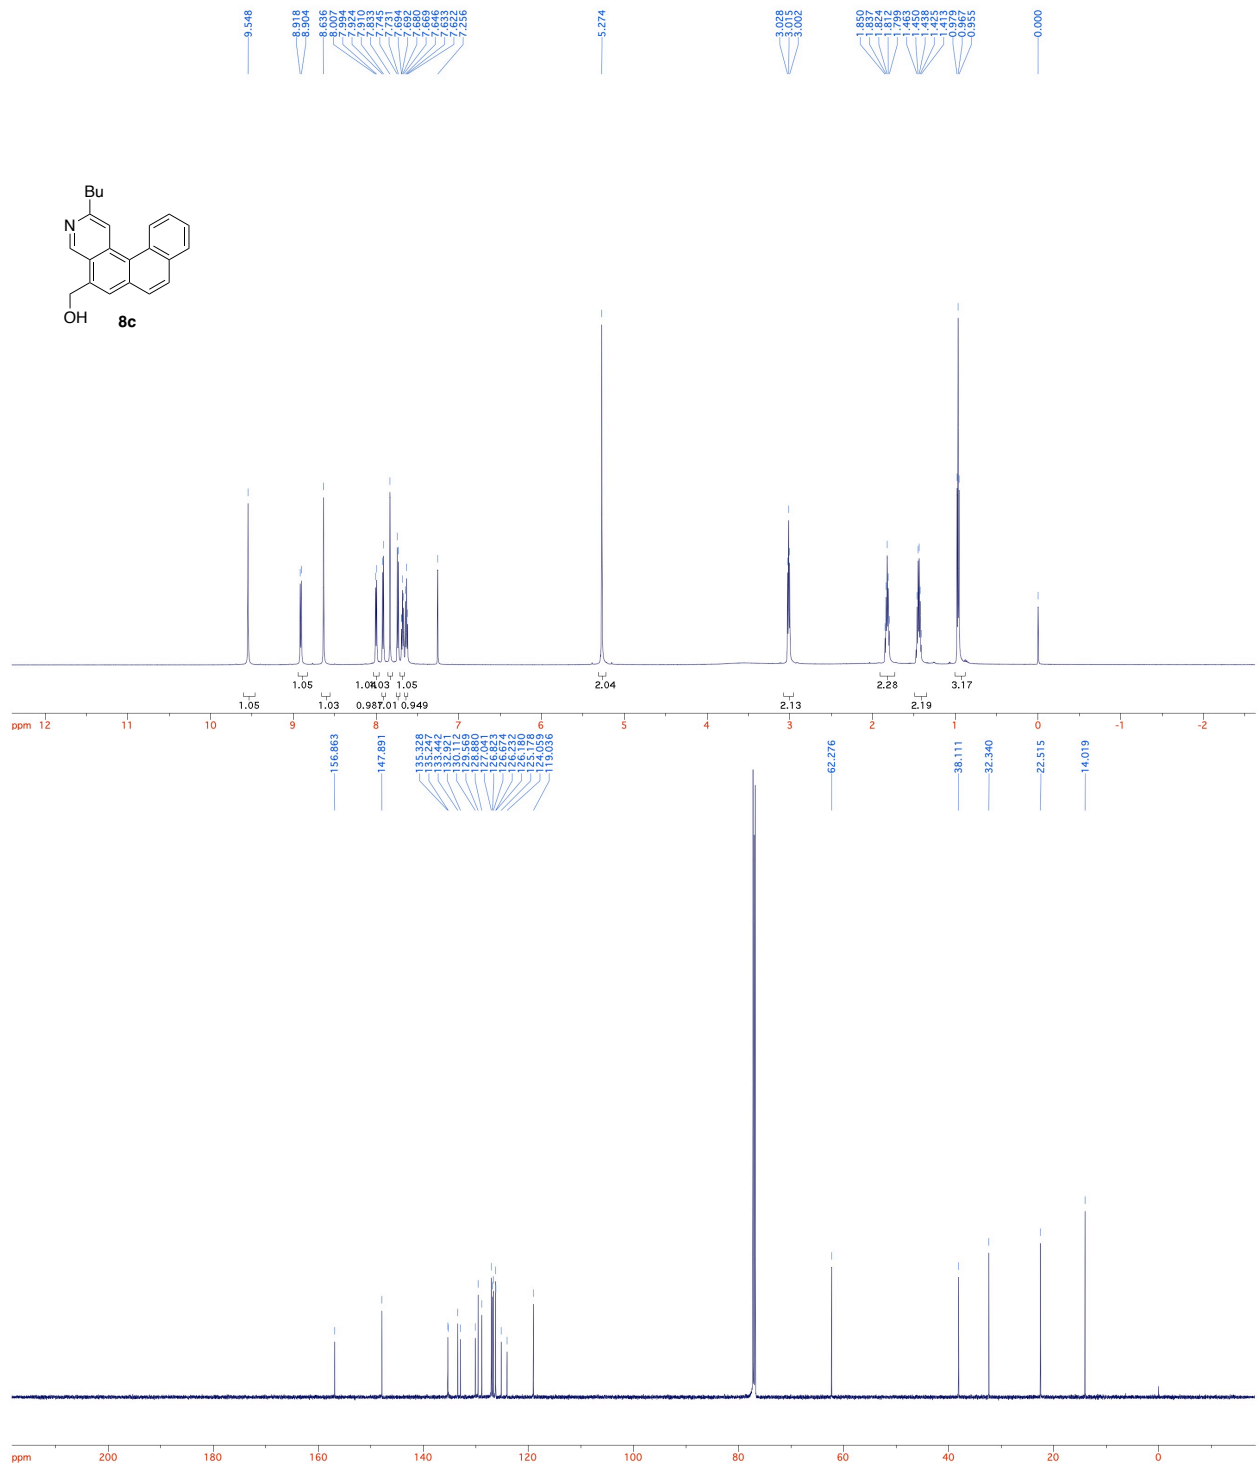

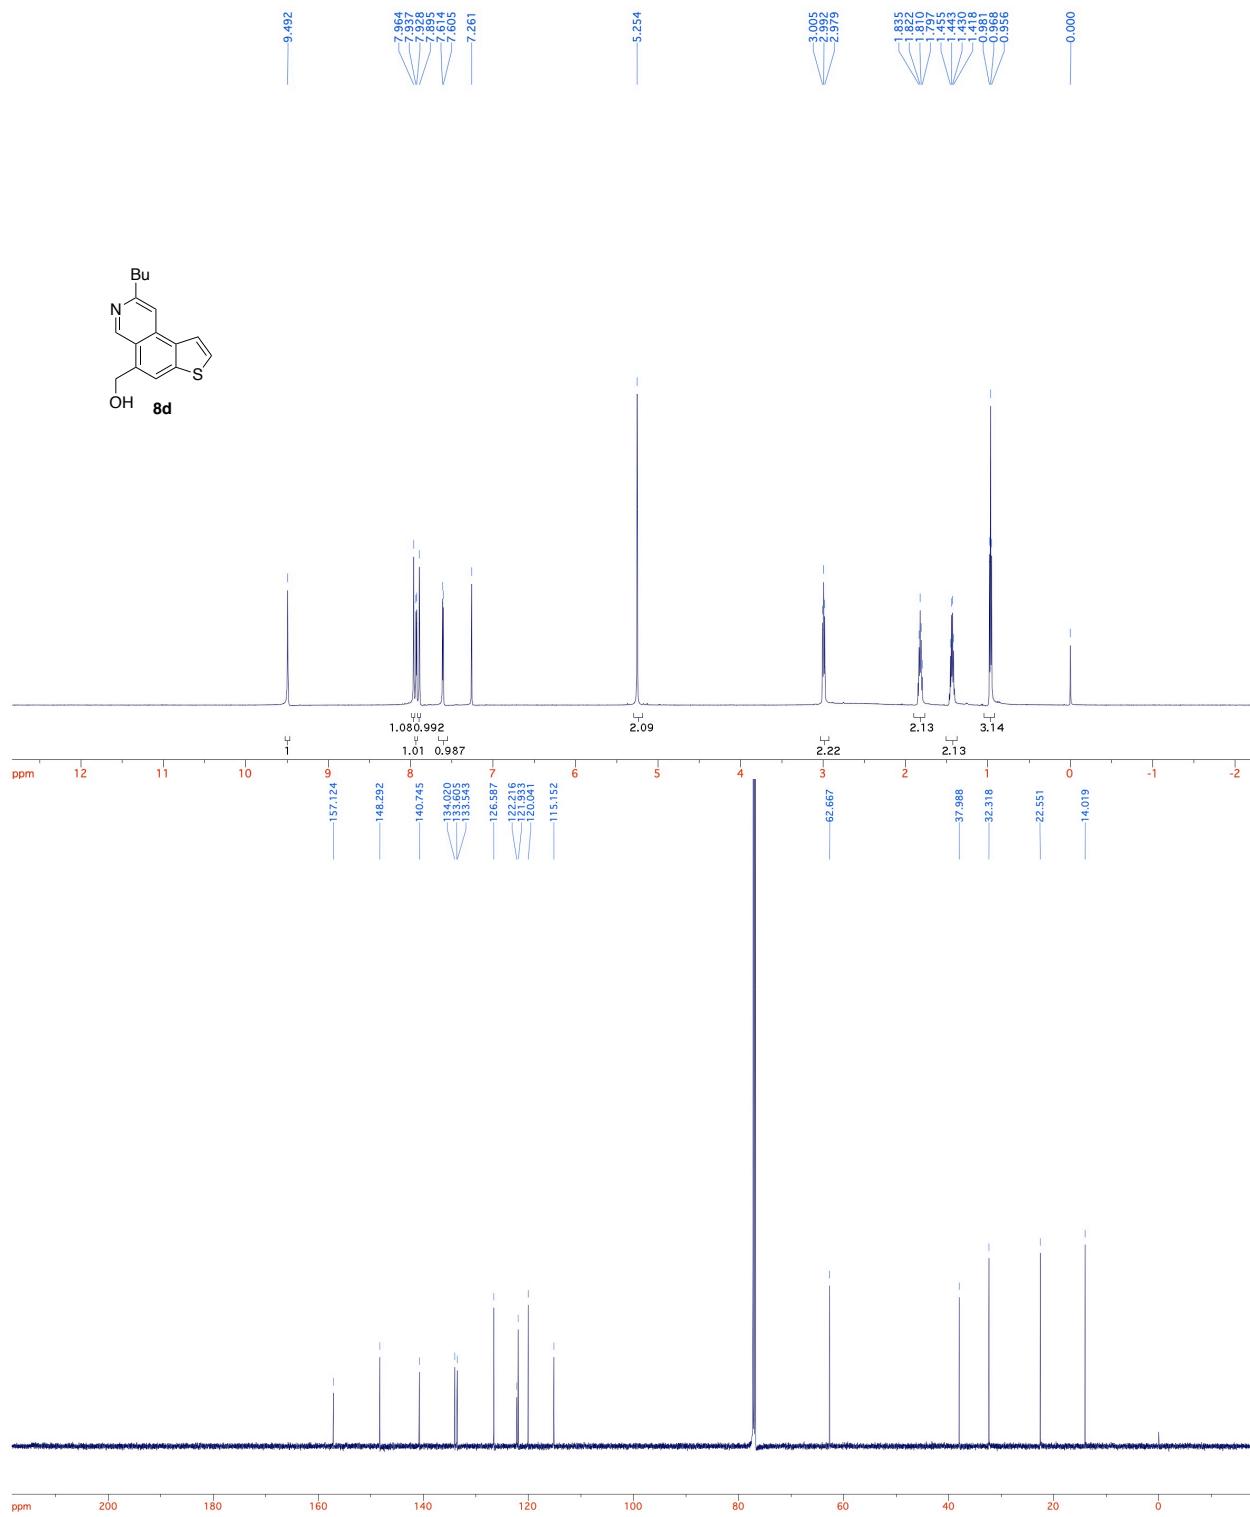

Supplement: d2qo00644h1.pdf [file d2qo00644h1.pdf]
